# Supplementary material for: Early Weaning Possibly Increases the Activity of Lipogenic and Adipogenic Pathways in Intramuscular Adipose Tissue of Nellore Calves
Source: MDPI journal article supplement (doi:10.3390/metabo13091028), 2023-09-21

Supplementary Material:

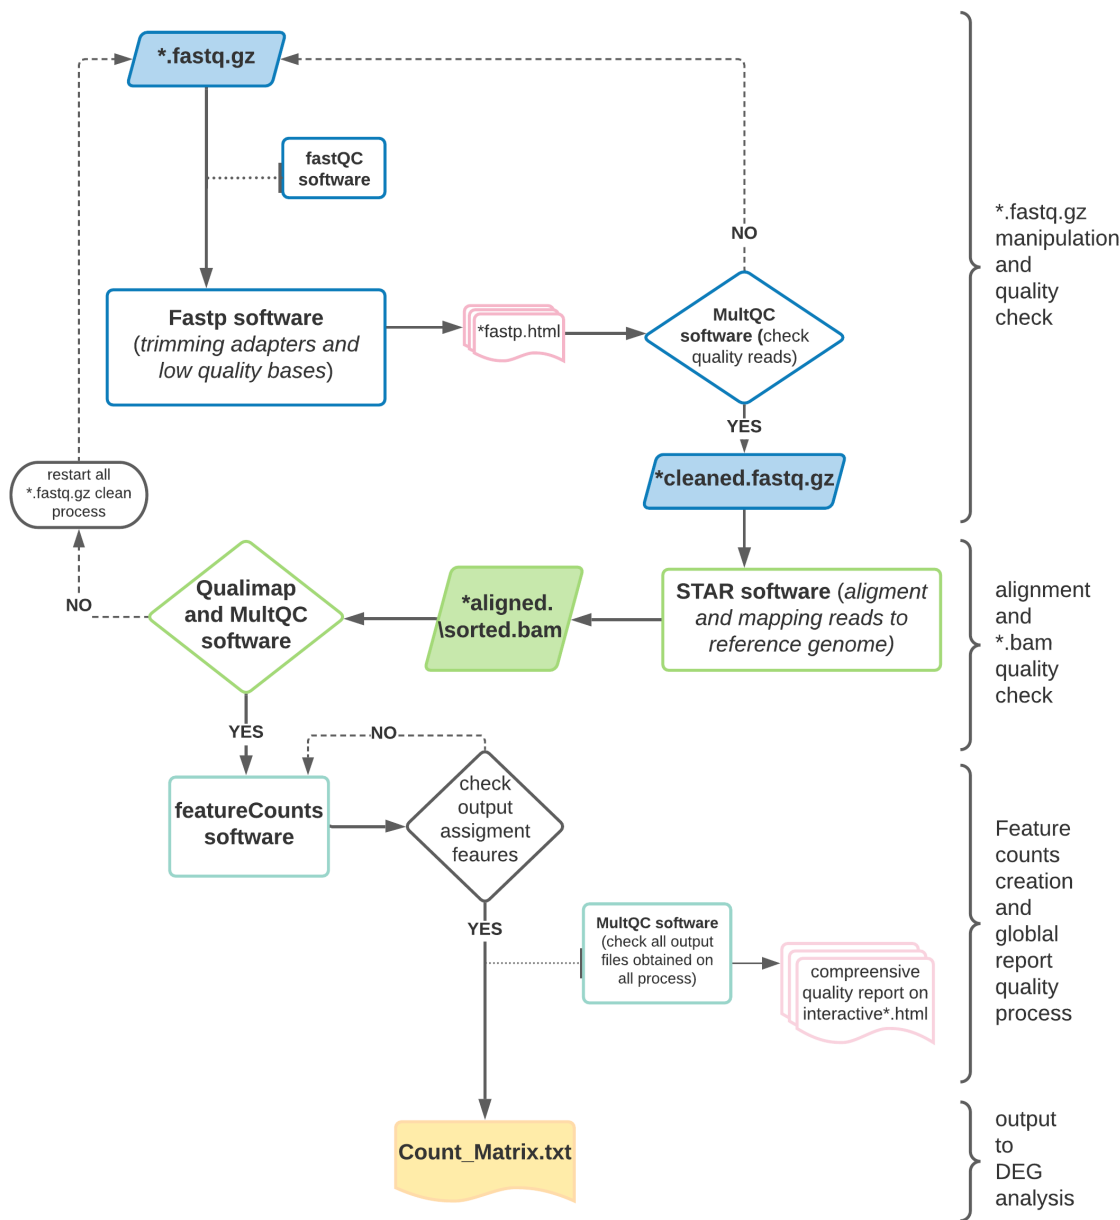

Figure S1 - Alignment and quality control at obtained raw count matrix fluxogram

Table S1 – Quality scores of reads after fastp QC control.

| Sample Name | Total Mb reads | Passed Filter (Mb) | Low Quality (Mb) | Too Many N (Mb) | % > Q30 | Mb Q30 bases | GC content | % PF   | % Adapter |
|-------------|----------------|--------------------|------------------|-----------------|---------|--------------|------------|--------|-----------|
| S10         | 24,55          | 23,25              | 1,30             | 1,82E-04        | 94,40%  | 2.185,30     | 52,20%     | 94,70% | 5,00%     |
| S11         | 22,36          | 21,26              | 1,10             | 4,48E-04        | 94,50%  | 1.993,60     | 52,20%     | 95,10% | 6,10%     |
| S12         | 24,26          | 23,15              | 1,10             | 3,16E-04        | 94,50%  | 2.175,70     | 51,10%     | 95,40% | 5,80%     |
| S13         | 23,64          | 22,44              | 1,20             | 3,20E-04        | 94,50%  | 2.109,20     | 52,40%     | 94,90% | 5,30%     |
| S14         | 19,14          | 17,98              | 1,15             | 2,42E-04        | 94,30%  | 1.687,60     | 52,60%     | 94,00% | 4,90%     |
| S15         | 24,44          | 23,01              | 1,43             | 3,56E-04        | 94,20%  | 2.156,40     | 52,10%     | 94,20% | 5,30%     |
| S16         | 22,93          | 21,64              | 1,29             | 1,96E-04        | 94,50%  | 2.034,40     | 54,40%     | 94,40% | 5,30%     |
| S17         | 21,41          | 20,12              | 1,29             | 5,16E-04        | 94,20%  | 1.885,60     | 52,30%     | 94,00% | 5,20%     |
| S18         | 24,44          | 22,80              | 1,64             | 1,68E-04        | 94,10%  | 2.137,00     | 52,70%     | 93,30% | 4,80%     |
| S19         | 25,64          | 24,19              | 1,45             | 3,60E-04        | 94,40%  | 2.268,80     | 52,80%     | 94,30% | 5,70%     |
| S1          | 22,45          | 21,09              | 1,36             | 3,44E-04        | 94,30%  | 1.970,00     | 52,50%     | 94,00% | 6,90%     |
| S20         | 25,12          | 23,72              | 1,39             | 1,86E-04        | 94,40%  | 2.228,80     | 53,70%     | 94,40% | 5,10%     |
| S21         | 22,96          | 21,59              | 1,36             | 4,04E-04        | 94,30%  | 2.017,70     | 52,10%     | 94,10% | 6,50%     |
| S22         | 23,00          | 21,63              | 1,37             | 3,20E-04        | 94,20%  | 2.029,30     | 52,00%     | 94,00% | 4,90%     |
| S23         | 23,24          | 21,95              | 1,29             | 3,28E-04        | 94,30%  | 2.055,00     | 51,90%     | 94,50% | 6,10%     |
| S24         | 24,44          | 22,90              | 1,53             | 3,08E-04        | 94,20%  | 2.146,90     | 52,10%     | 93,70% | 5,10%     |
| S25         | 25,77          | 24,38              | 1,39             | 4,18E-04        | 94,30%  | 2.284,60     | 51,60%     | 94,60% | 5,90%     |
| S26         | 27,93          | 26,48              | 1,45             | 4,68E-04        | 94,40%  | 2.485,50     | 52,40%     | 94,80% | 5,20%     |
| S27         | 23,34          | 21,95              | 1,39             | 4,24E-04        | 94,30%  | 2.052,30     | 51,90%     | 94,10% | 6,40%     |
| S28         | 26,34          | 24,86              | 1,48             | 4,24E-04        | 94,30%  | 2.329,30     | 51,50%     | 94,40% | 5,90%     |
| S29         | 22,83          | 21,36              | 1,47             | 3,40E-04        | 94,10%  | 2.002,10     | 52,20%     | 93,60% | 4,70%     |
| S2          | 23,87          | 22,82              | 1,05             | 3,58E-04        | 94,60%  | 2.142,80     | 52,20%     | 95,60% | 6,20%     |
| S30         | 24,35          | 23,03              | 1,31             | 4,14E-04        | 94,30%  | 2.161,40     | 51,70%     | 94,60% | 4,90%     |
| S31         | 25,04          | 23,62              | 1,42             | 4,58E-04        | 94,30%  | 2.210,30     | 52,00%     | 94,30% | 6,30%     |
| S32         | 25,53          | 24,05              | 1,47             | 4,06E-04        | 94,30%  | 2.246,00     | 52,40%     | 94,20% | 7,00%     |
| S3          | 22,52          | 21,11              | 1,41             | 2,84E-04        | 94,20%  | 1.974,80     | 52,30%     | 93,70% | 5,80%     |
| S4          | 21,57          | 20,28              | 1,29             | 2,54E-04        | 94,20%  | 1.895,80     | 52,80%     | 94,00% | 6,40%     |
| S5          | 20,58          | 19,21              | 1,37             | 2,88E-04        | 94,10%  | 1.793,10     | 52,40%     | 93,30% | 6,30%     |
| S6          | 22,11          | 20,76              | 1,35             | 2,46E-04        | 94,20%  | 1.943,90     | 52,90%     | 93,90% | 5,70%     |
| S7          | 23,86          | 22,68              | 1,18             | 3,04E-04        | 94,50%  | 2.127,20     | 51,70%     | 95,10% | 6,10%     |
| S8          | 23,20          | 22,04              | 1,17             | 2,20E-04        | 94,50%  | 2.073,00     | 52,10%     | 95,00% | 4,80%     |
| S9          | 22,21          | 20,76              | 1,45             | 4,24E-04        | 94,10%  | 1.932,40     | 52,40%     | 93,50% | 7,20%     |
| Total       | 755,05         | 712,14             | 42,90            | 0,01            |         | 66735,80     |            |        |           |
| Mean        | 23,60          | 22,25              | 1,34             | 3,35E-04        | 94,31%  | 2085,494     | 52,30%     | 94,30% | 5,71%     |
| SD          | 1,76           | 1,71               | 0,13             | 9,22E-05        | 0,14%   | 161,8689     | 0,61%      | 0,58%  | 0,70%     |
| Min.        | 19,14          | 17,98              | 1,05             | 1,68E-04        | 94,10%  | 1687,60      | 51,10%     | 93,30% | 4,70%     |
| Max.        | 27,93          | 26,48              | 1,64             | 5,16E-04        | 94,60%  | 2485,50      | 54,40%     | 95,60% | 7,20%     |

**Table S2 – Metrics of alignments and assigned exons.**

| Sample Name  | Total Mapped  | Total Unmapped | % Uniquely Aligned | M Uniquely Aligned <sup>1</sup> | % Uniquely Assigned | M Uniquely Assigned <sup>2</sup> |
|--------------|---------------|----------------|--------------------|---------------------------------|---------------------|----------------------------------|
| GLP-10_S10   | 10,53         | 1,09           | 89,20%             | 10,4                            | 69,30%              | 8,2                              |
| GLP-11_S11   | 9,73          | 0,90           | 90,00%             | 9,6                             | 70,60%              | 7,65                             |
| GLP-12_S12   | 10,65         | 0,92           | 90,60%             | 10,5                            | 69,80%              | 8,25                             |
| GLP-13_S13   | 10,27         | 0,94           | 90,10%             | 10,1                            | 71,70%              | 8,2                              |
| GLP-14_S14   | 8,07          | 0,92           | 88,30%             | 7,9                             | 70,50%              | 6,45                             |
| GLP-15_S15   | 10,35         | 1,15           | 88,60%             | 10,2                            | 69,50%              | 8,15                             |
| GLP-16_S16   | 9,87          | 0,95           | 89,40%             | 9,7                             | 75,90%              | 8,4                              |
| GLP-17_S17   | 9,01          | 1,05           | 88,10%             | 8,9                             | 68,10%              | 7                                |
| GLP-18_S18   | 10,13         | 1,27           | 87,50%             | 10                              | 67,10%              | 7,8                              |
| GLP-19_S19   | 10,89         | 1,20           | 88,70%             | 10,7                            | 68,60%              | 8,45                             |
| GLP-1_S1     | 9,51          | 1,04           | 88,80%             | 9,4                             | 70,30%              | 7,55                             |
| GLP-20_S20   | 10,73         | 1,13           | 88,90%             | 10,5                            | 70,70%              | 8,55                             |
| GLP-21_S21   | 9,74          | 1,05           | 88,60%             | 9,6                             | 66,90%              | 7,4                              |
| GLP-22_S22   | 9,72          | 1,10           | 88,50%             | 9,6                             | 69,30%              | 7,65                             |
| GLP-23_S23   | 9,93          | 1,04           | 88,90%             | 9,8                             | 68,20%              | 7,65                             |
| GLP-24_S24   | 10,26         | 1,19           | 88,20%             | 10,1                            | 67,80%              | 7,9                              |
| GLP-25_S25   | 11,06         | 1,13           | 89,30%             | 10,9                            | 69,00%              | 8,55                             |
| GLP-26_S26   | 12,04         | 1,19           | 89,30%             | 11,8                            | 66,70%              | 9                                |
| GLP-27_S27   | 9,80          | 1,17           | 87,90%             | 9,6                             | 67,20%              | 7,5                              |
| GLP-28_S28   | 11,17         | 1,26           | 88,40%             | 11                              | 67,10%              | 8,5                              |
| GLP-29_S29   | 9,48          | 1,20           | 87,30%             | 9,3                             | 66,10%              | 7,2                              |
| GLP-2_S2     | 10,62         | 0,79           | 91,60%             | 10,5                            | 73,10%              | 8,5                              |
| GLP-30_S30   | 10,45         | 1,06           | 89,20%             | 10,3                            | 68,00%              | 8                                |
| GLP-31_S31   | 10,59         | 1,22           | 88,20%             | 10,4                            | 65,70%              | 7,9                              |
| GLP-32_S32   | 10,84         | 1,19           | 88,30%             | 10,6                            | 71,70%              | 8,85                             |
| GLP-3_S3     | 9,46          | 1,09           | 88,20%             | 9,3                             | 69,80%              | 7,5                              |
| GLP-4_S4     | 9,10          | 1,03           | 88,40%             | 9                               | 68,10%              | 7,05                             |
| GLP-5_S5     | 8,57          | 1,03           | 87,90%             | 8,4                             | 69,60%              | 6,8                              |
| GLP-6_S6     | 9,33          | 1,05           | 88,50%             | 9,2                             | 70,70%              | 7,45                             |
| GLP-7_S7     | 10,35         | 0,99           | 89,90%             | 10,2                            | 70,80%              | 8,2                              |
| GLP-8_S8     | 10,05         | 0,97           | 89,70%             | 9,9                             | 72,90%              | 8,2                              |
| GLP-9_S9     | 9,22          | 1,16           | 87,30%             | 9,1                             | 68,00%              | 7,2                              |
| <b>Total</b> | <b>321,56</b> | <b>34,51</b>   |                    | <b>316,5</b>                    |                     | <b>251,65</b>                    |
| <b>Mean</b>  | <b>10,05</b>  | <b>1,08</b>    | <b>88,81%</b>      | <b>9,9</b>                      | <b>70,34%</b>       | <b>7,86</b>                      |
| <b>SD</b>    | <b>0,81</b>   | <b>0,11</b>    | <b>0,95%</b>       | <b>0,79</b>                     | <b>2,23%</b>        | <b>0,61</b>                      |
| <b>Min.</b>  | <b>8,07</b>   | <b>0,79</b>    | <b>87,30%</b>      | <b>7,90</b>                     | <b>65,70%</b>       | <b>6,45</b>                      |
| <b>Max .</b> | <b>12,04</b>  | <b>1,27</b>    | <b>91,60%</b>      | <b>11,80</b>                    | <b>75,90%</b>       | <b>9,00</b>                      |

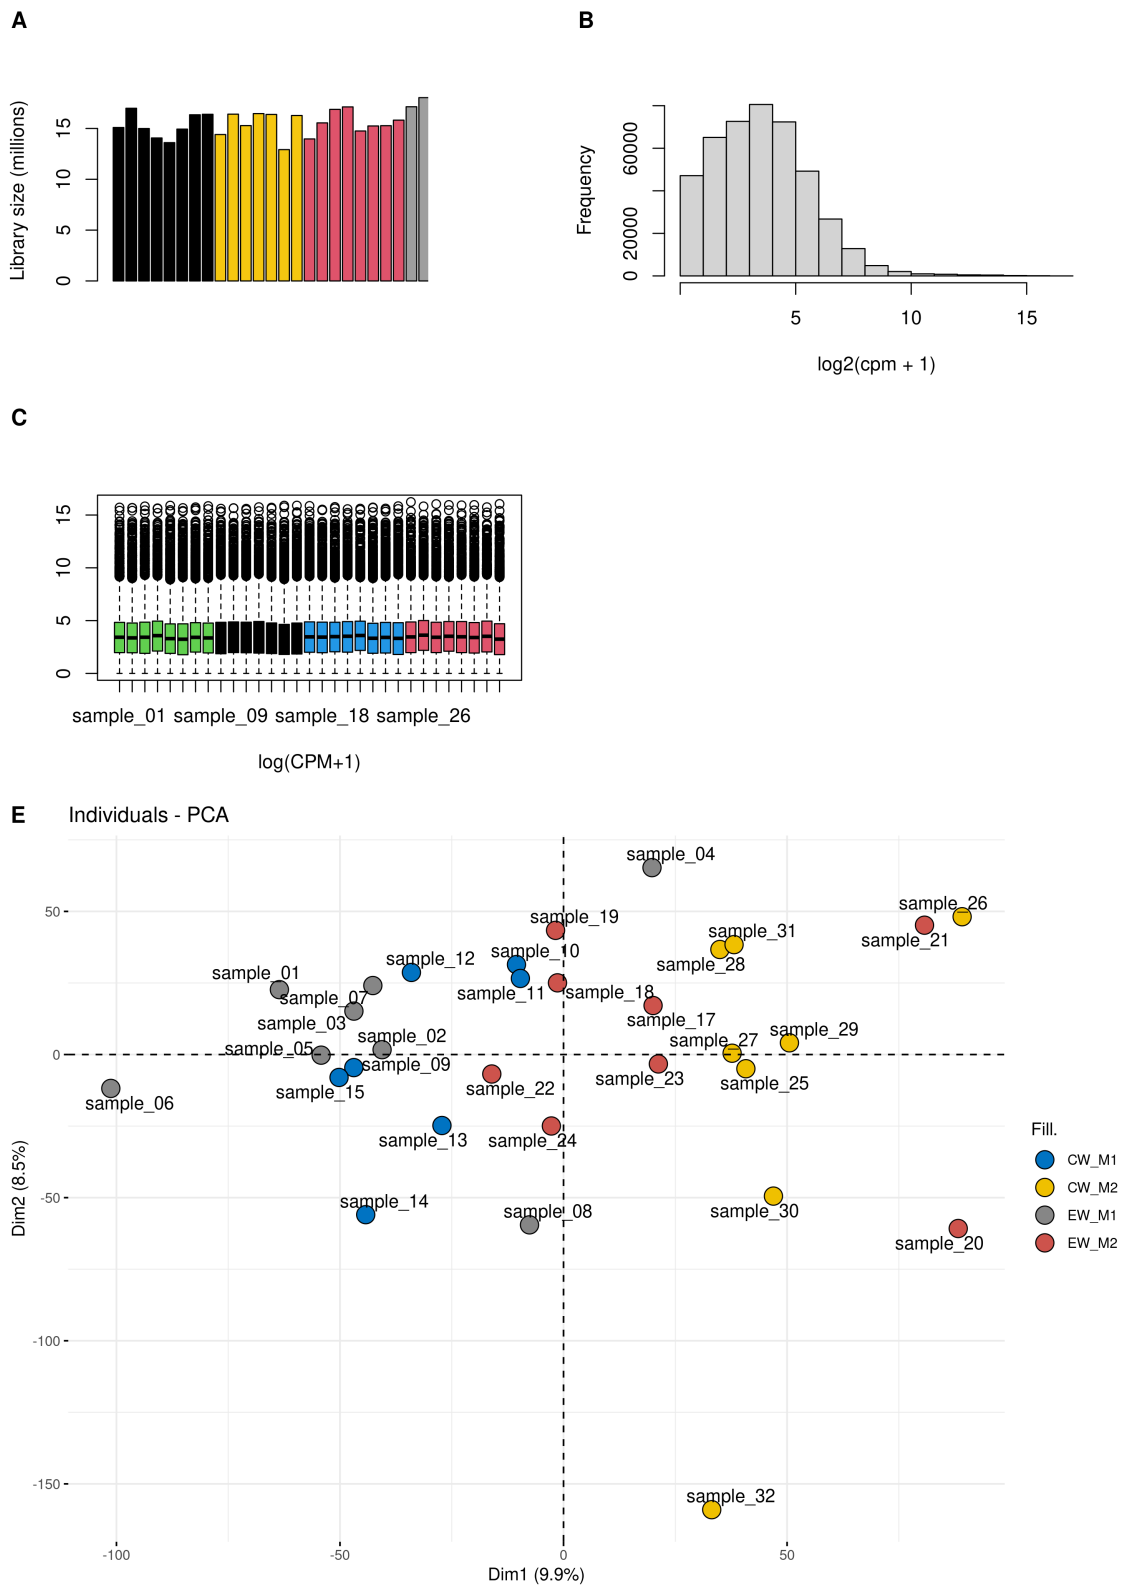

**Figure S2** – Size Library (A), distribution of all normalized scaled counts (B), boxplot of normalized scaled counts per sample (C) and PCA plot (E).

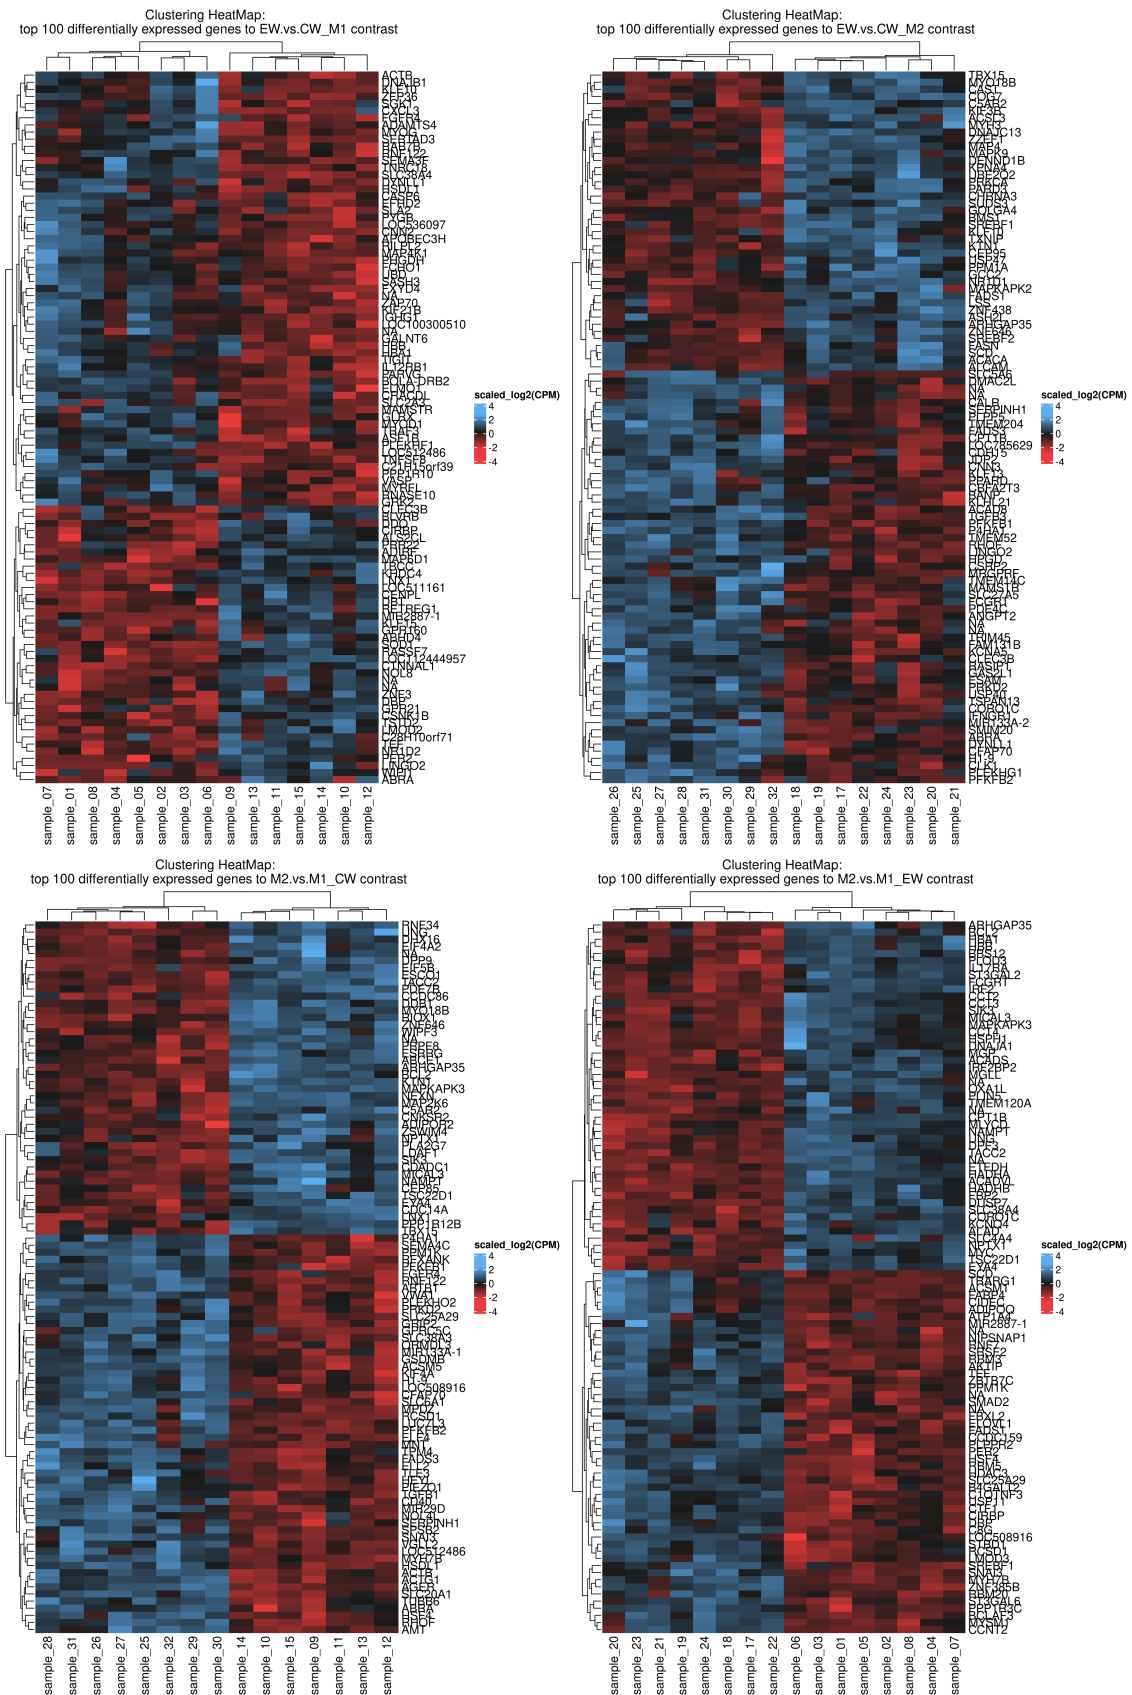

**Figure S3.** Clustergram of scaled log<sub>2</sub>(CPM) from 100 more expressed genes to each one contrast.

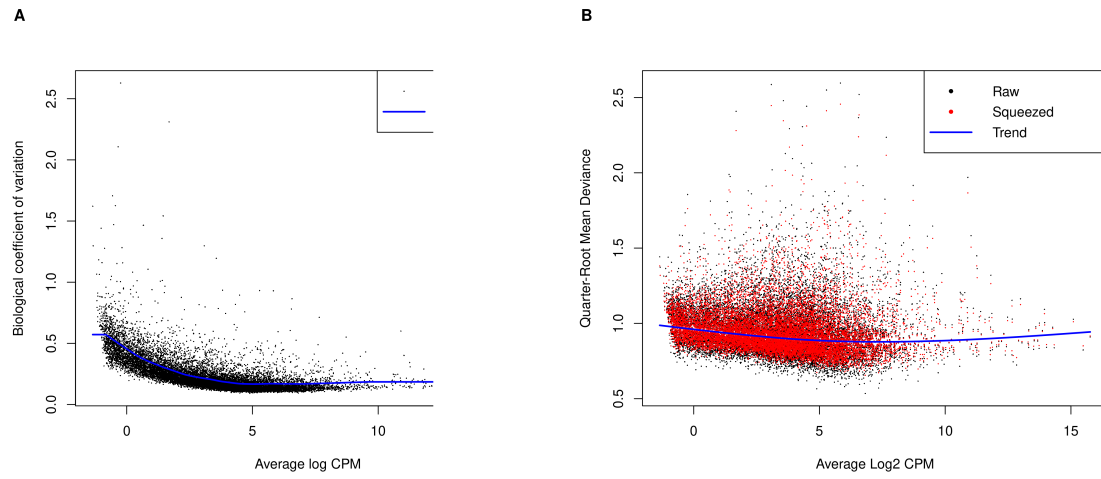

**Figure S4** – Biological variation and counts deviation.

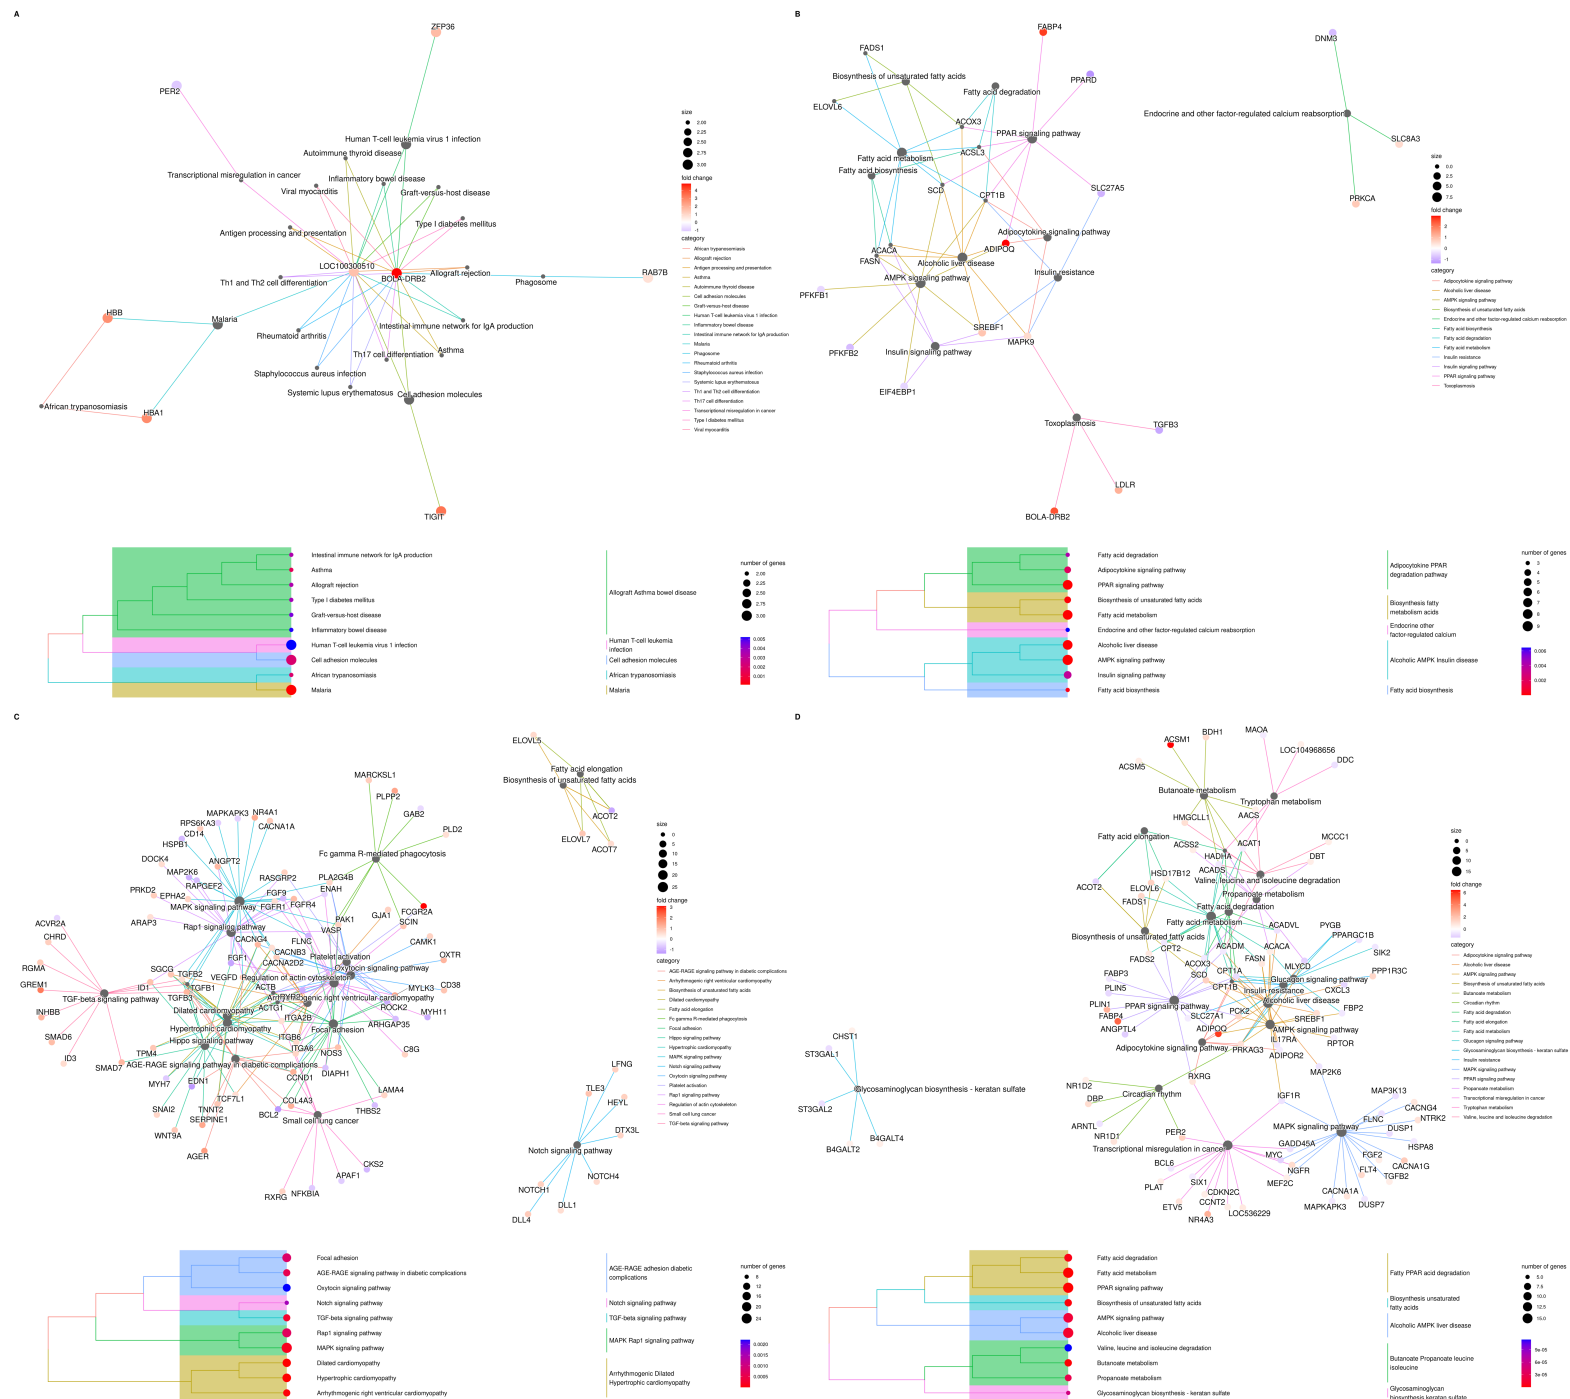

Supplement: s1 [file s1]
