# Supplementary material for: Early Weaning Possibly Increases the Activity of Lipogenic and Adipogenic Pathways in Intramuscular Adipose Tissue of Nellore Calves
Source: MDPI journal article supplement (doi:10.3390/metabo13091028), 2023-09-21
Supplement: s1 [file s1]

# 1. Enriched KEGG pathways to DEG prospect in EW vs CW into time 1

| ID       | Description                                  | count | terms | BgRatio  | pvalue   | p.adjust | qvalue   | Count.UpReg | geneID.UpReg                          | Count.DownReg | geneID.DownReg | GeneRatio.Up | GeneRatio.Down | GeneRatio |
|----------|----------------------------------------------|-------|-------|----------|----------|----------|----------|-------------|---------------------------------------|---------------|----------------|--------------|----------------|-----------|
| bta05144 | Malaria                                      | 3     | 14    | 61/9095  | 9.91e-05 | 9.91e-05 | 3.86e-03 | 3           | <i>HBA1; HBB; LOC100300510</i>        | 0             | 0              | 3/14         | 0/14           | 3/14      |
| bta05310 | Asthma                                       | 2     | 14    | 39/9095  | 1.58e-03 | 1.58e-03 | 1.92e-02 | 2           | <i>BOLA-DRB2; LOC100300510</i>        | 0             | 0              | 2/14         | 0/14           | 2/14      |
| bta05143 | African trypanosomiasis                      | 2     | 14    | 44/9095  | 2.01e-03 | 2.01e-03 | 1.92e-02 | 2           | <i>HBA1; HBB</i>                      | 0             | 0              | 2/14         | 0/14           | 2/14      |
| bta04514 | Cell adhesion molecules                      | 3     | 14    | 171/9095 | 2.04e-03 | 2.04e-03 | 1.92e-02 | 3           | <i>BOLA-DRB2; LOC100300510; TIGIT</i> | 0             | 0              | 3/14         | 0/14           | 3/14      |
| bta04672 | Intestinal immune network for IgA production | 2     | 14    | 58/9095  | 3.46e-03 | 3.46e-03 | 1.92e-02 | 2           | <i>BOLA-DRB2; LOC100300510</i>        | 0             | 0              | 2/14         | 0/14           | 2/14      |
| bta05330 | Allograft rejection                          | 2     | 14    | 58/9095  | 3.46e-03 | 3.46e-03 | 1.92e-02 | 2           | <i>BOLA-DRB2; LOC100300510</i>        | 0             | 0              | 2/14         | 0/14           | 2/14      |
| bta04940 | Type 1 diabetes mellitus                     | 2     | 14    | 60/9095  | 3.70e-03 | 3.70e-03 | 1.92e-02 | 2           | <i>BOLA-DRB2; LOC100300510</i>        | 0             | 0              | 2/14         | 0/14           | 2/14      |
| bta05332 | Graft-versus-host disease                    | 2     | 14    | 66/9095  | 4.46e-03 | 4.46e-03 | 1.92e-02 | 2           | <i>BOLA-DRB2; LOC100300510</i>        | 0             | 0              | 2/14         | 0/14           | 2/14      |
| bta05321 | Inflammatory bowel disease                   | 2     | 14    | 71/9095  | 5.15e-03 | 5.15e-03 | 1.92e-02 | 2           | <i>BOLA-DRB2; LOC100300510</i>        | 0             | 0              | 2/14         | 0/14           | 2/14      |
| bta05166 | Human T-cell leukemia virus 1 infection      | 3     | 14    | 238/9095 | 5.20e-03 | 5.20e-03 | 1.92e-02 | 3           | <i>BOLA-DRB2; LOC100300510; ZFP36</i> | 0             | 0              | 3/14         | 0/14           | 3/14      |
| bta05320 | Autoimmune thyroid disease                   | 2     | 14    | 73/9095  | 5.43e-03 | 5.43e-03 | 1.92e-02 | 2           | <i>BOLA-DRB2; LOC100300510</i>        | 0             | 0              | 2/14         | 0/14           | 2/14      |
| bta05416 | Viral myocarditis                            | 2     | 14    | 78/9095  | 6.18e-03 | 6.18e-03 | 2.01e-02 | 2           | <i>BOLA-DRB2; LOC100300510</i>        | 0             | 0              | 2/14         | 0/14           | 2/14      |
| bta04612 | Antigen processing and presentation          | 2     | 14    | 91/9095  | 8.33e-03 | 8.33e-03 | 2.50e-02 | 2           | <i>BOLA-DRB2; LOC100300510</i>        | 0             | 0              | 2/14         | 0/14           | 2/14      |
| bta04658 | Th1 and Th2 cell differentiation             | 2     | 14    | 99/9095  | 9.80e-03 | 9.80e-03 | 2.73e-02 | 2           | <i>BOLA-DRB2; LOC100300510</i>        | 0             | 0              | 2/14         | 0/14           | 2/14      |
| bta05323 | Rheumatoid arthritis                         | 2     | 14    | 106/9095 | 1.12e-02 | 1.12e-02 | 2.77e-02 | 2           | <i>BOLA-DRB2; LOC100300510</i>        | 0             | 0              | 2/14         | 0/14           | 2/14      |
| bta05150 | Staphylococcus aureus infection              | 2     | 14    | 107/9095 | 1.14e-02 | 1.14e-02 | 2.77e-02 | 2           | <i>BOLA-DRB2; LOC100300510</i>        | 0             | 0              | 2/14         | 0/14           | 2/14      |
| bta04659 | Th17 cell differentiation                    | 2     | 14    | 116/9095 | 1.33e-02 | 1.33e-02 | 3.04e-02 | 2           | <i>BOLA-DRB2; LOC100300510</i>        | 0             | 0              | 2/14         | 0/14           | 2/14      |
| bta04145 | Phagosome                                    | 2     | 14    | 172/9095 | 2.79e-02 | 2.79e-02 | 6.03e-02 | 2           | <i>BOLA-DRB2; RAB7B</i>               | 0             | 0              | 2/14         | 0/14           | 2/14      |
| bta05322 | Systemic lupus erythematosus                 | 2     | 14    | 190/9095 | 3.35e-02 | 3.35e-02 | 6.87e-02 | 2           | <i>BOLA-DRB2; LOC100300510</i>        | 0             | 0              | 2/14         | 0/14           | 2/14      |
| bta05202 | Transcriptional misregulation in cancer      | 2     | 14    | 200/9095 | 3.68e-02 | 3.68e-02 | 7.17e-02 | 1           | <i>LOC100300510</i>                   | 1             | PER2           | 1/14         | 1/14           | 2/14      |
| bta00640 | Propanoate metabolism                        | 1     | 14    | 31/9095  | 4.67e-02 | 4.67e-02 | 8.66e-02 | 0           | 0                                     | 1             | DBT            | 0/14         | 1/14           | 1/14      |
| bta05169 | Epstein-Barr virus infection                 | 2     | 14    | 235/9095 | 4.93e-02 | 4.93e-02 | 8.73e-02 | 2           | <i>BOLA-DRB2; LOC100300510</i>        | 0             | 0              | 2/14         | 0/14           | 2/14      |

2. Enriched KEGG pathways to DEG prospect in EW vs CW into time 2

| ID       | Description                                               | count | terms | BgRatio  | pvalue   | p.adjust | qvalue   | Count.UpReg | geneID.UpReg                            | Count.DownReg | geneID.DownReg                  | GeneRatio.Up | GeneRatio.Down | GeneRatio |
|----------|-----------------------------------------------------------|-------|-------|----------|----------|----------|----------|-------------|-----------------------------------------|---------------|---------------------------------|--------------|----------------|-----------|
| bta01212 | Fatty acid metabolism                                     | 8     | 68    | 58/9095  | 9.12e-09 | 9.12e-09 | 1.81e-06 | 6           | ACACA; ACSL3; ELOVL6; FADS1; FASN; SCD  | 2             | ACOX3; CPT1B                    | 6/68         | 2/68           | 8/68      |
| bta03320 | PPAR signaling pathway                                    | 8     | 68    | 84/9095  | 1.78e-07 | 1.78e-07 | 1.77e-05 | 4           | ACSL3; ADIPOQ; FABP4; SCD               | 4             | ACOX3; CPT1B; PPARG; SLC27A5    | 4/68         | 4/68           | 8/68      |
| bta04152 | AMPK signaling pathway                                    | 9     | 68    | 124/9095 | 3.04e-07 | 3.04e-07 | 2.02e-05 | 5           | ACACA; ADIPOQ; FASN; SCD; SREBF1        | 4             | CPT1B; EIF4EBP1; PFKFB1; PFKFB2 | 5/68         | 4/68           | 9/68      |
| bta04936 | Alcoholic liver disease                                   | 8     | 68    | 154/9095 | 1.76e-05 | 1.76e-05 | 8.76e-04 | 6           | ACACA; ADIPOQ; FASN; MAPK9; SCD; SREBF1 | 2             | ACOX3; CPT1B                    | 6/68         | 2/68           | 8/68      |
| bta01040 | Biosynthesis of unsaturated fatty acids                   | 4     | 68    | 30/9095  | 6.77e-05 | 6.77e-05 | 2.69e-03 | 3           | ELOVL6; FADS1; SCD                      | 1             | ACOX3                           | 3/68         | 1/68           | 4/68      |
| bta00061 | Fatty acid biosynthesis                                   | 3     | 68    | 18/9095  | 3.01e-04 | 3.01e-04 | 9.98e-03 | 3           | ACACA; ACSL3; FASN                      | 0             | 0                               | 3/68         | 0/68           | 3/68      |
| bta04920 | Adipocytokine signaling pathway                           | 4     | 68    | 72/9095  | 2.01e-03 | 2.01e-03 | 5.70e-02 | 3           | ACSL3; ADIPOQ; MAPK9                    | 1             | CPT1B                           | 3/68         | 1/68           | 4/68      |
| bta04910 | Insulin signaling pathway                                 | 5     | 68    | 138/9095 | 3.63e-03 | 3.63e-03 | 9.02e-02 | 4           | ACACA; FASN; MAPK9; SREBF1              | 1             | EIF4EBP1                        | 4/68         | 1/68           | 5/68      |
| bta00071 | Fatty acid degradation                                    | 3     | 68    | 44/9095  | 4.25e-03 | 4.25e-03 | 9.40e-02 | 1           | ACSL3                                   | 2             | ACOX3; CPT1B                    | 1/68         | 2/68           | 3/68      |
| bta04961 | Endocrine and other factor-regulated calcium reabsorption | 3     | 68    | 51/9095  | 6.44e-03 | 6.44e-03 | 1.28e-01 | 2           | PRKCA; SLC8A3                           | 1             | DNM3                            | 2/68         | 1/68           | 3/68      |
| bta04931 | Insulin resistance                                        | 4     | 68    | 110/9095 | 9.11e-03 | 9.11e-03 | 1.65e-01 | 2           | MAPK9; SREBF1                           | 2             | CPT1B; SLC27A5                  | 2/68         | 2/68           | 4/68      |
| bta05145 | Toxoplasmosis                                             | 4     | 68    | 114/9095 | 1.03e-02 | 1.03e-02 | 1.71e-01 | 3           | BOLA-DRB2; LDLR; MAPK9                  | 1             | TGFB3                           | 3/68         | 1/68           | 4/68      |
| bta05152 | Tuberculosis                                              | 5     | 68    | 205/9095 | 1.83e-02 | 1.83e-02 | 2.81e-01 | 3           | BOLA-DRB2; CEBPG; MAPK9                 | 2             | RFXANK; TGFB3                   | 3/68         | 2/68           | 5/68      |
| bta00640 | Propanoate metabolism                                     | 2     | 68    | 31/9095  | 2.23e-02 | 2.23e-02 | 2.97e-01 | 1           | ACACA                                   | 1             | ACOX3                           | 1/68         | 1/68           | 2/68      |
| bta05207 | Chemical carcinogenesis - receptor activation             | 5     | 68    | 216/9095 | 2.24e-02 | 2.24e-02 | 2.97e-01 | 3           | CHRNA3; KPNA4; PRKCA                    | 2             | ADRB2; EIF4EBP1                 | 3/68         | 2/68           | 5/68      |
| bta04012 | ErbB signaling pathway                                    | 3     | 68    | 84/9095  | 2.48e-02 | 2.48e-02 | 3.08e-01 | 2           | MAPK9; PRKCA                            | 1             | EIF4EBP1                        | 2/68         | 1/68           | 3/68      |
| bta00051 | Fructose and mannose metabolism                           | 2     | 68    | 34/9095  | 2.65e-02 | 2.65e-02 | 3.10e-01 | 0           | 0                                       | 2             | PFKFB1; PFKFB2                  | 0/68         | 2/68           | 2/68      |
| bta04211 | Longevity regulating pathway                              | 3     | 68    | 90/9095  | 2.96e-02 | 2.96e-02 | 3.27e-01 | 1           | ADIPOQ                                  | 2             | ATG101; EIF4EBP1                | 1/68         | 2/68           | 3/68      |
| bta04925 | Aldosterone synthesis and secretion                       | 3     | 68    | 96/9095  | 3.49e-02 | 3.49e-02 | 3.31e-01 | 2           | LDLR; PRKCA                             | 1             | PRKD2                           | 2/68         | 1/68           | 3/68      |
| bta05231 | Choline metabolism in cancer                              | 3     | 68    | 99/9095  | 3.77e-02 | 3.77e-02 | 3.31e-01 | 2           | MAPK9; PRKCA                            | 1             | EIF4EBP1                        | 2/68         | 1/68           | 3/68      |
| bta04514 | Cell adhesion molecules                                   | 4     | 68    | 171/9095 | 3.88e-02 | 3.88e-02 | 3.31e-01 | 2           | ALCAM; BOLA-DRB2                        | 2             | CDH15; LOC616254                | 2/68         | 2/68           | 4/68      |
| bta04020 | Calcium signaling pathway                                 | 5     | 68    | 252/9095 | 3.98e-02 | 3.98e-02 | 3.31e-01 | 2           | PRKCA; SLC8A3                           | 3             | ADRB2; CD38; MYLK4              | 2/68         | 3/68           | 5/68      |
| bta04970 | Salivary secretion                                        | 3     | 68    | 102/9095 | 4.06e-02 | 4.06e-02 | 3.31e-01 | 1           | PRKCA                                   | 2             | ADRB2; CD38                     | 1/68         | 2/68           | 3/68      |
| bta04922 | Glucagon signaling pathway                                | 3     | 68    | 103/9095 | 4.16e-02 | 4.16e-02 | 3.31e-01 | 1           | ACACA                                   | 2             | CPT1B; PFKFB1                   | 1/68         | 2/68           | 3/68      |
| bta04933 | AGE-RAGE signaling pathway in diabetic complications      | 3     | 68    | 103/9095 | 4.16e-02 | 4.16e-02 | 3.31e-01 | 2           | MAPK9; PRKCA                            | 1             | TGFB3                           | 2/68         | 1/68           | 3/68      |
| bta04930 | Type II diabetes mellitus                                 | 2     | 68    | 46/9095  | 4.62e-02 | 4.62e-02 | 3.53e-01 | 2           | ADIPOQ; MAPK9                           | 0             | 0                               | 2/68         | 0/68           | 2/68      |
| bta04066 | HIF-1 signaling pathway                                   | 3     | 68    | 110/9095 | 4.90e-02 | 4.90e-02 | 3.61e-01 | 1           | PRKCA                                   | 2             | ANGPT2; EIF4EBP1                | 1/68         | 2/68           | 3/68      |

### 3. Enriched KEGG pathways to DEG prospect in T2 vs T1 into conventional weaning group

| ID       | Description                                          | count | terms | BgRatio  | pvalue   | p.adjust | qvalue   | Count.UpReg | geneID.UpReg                                                                                                                    | Count.DownReg | geneID.DownReg                                              | GeneRatio.Up | GeneRatio.Down | GeneRatio |
|----------|------------------------------------------------------|-------|-------|----------|----------|----------|----------|-------------|---------------------------------------------------------------------------------------------------------------------------------|---------------|-------------------------------------------------------------|--------------|----------------|-----------|
| bta05410 | Hypertrophic cardiomyopathy                          | 17    | 349   | 92/9095  | 5.86e-08 | 5.86e-08 | 1.57e-05 | 14          | ACTB; ACTG1; CACNA2D2; CACNB3; CACNG4; ITGA2B; ITGA6; ITGB6; SGCG; TGFB1; TGFB2; TGFB3; TNNT2; TPM4                             | 3             | EDN1; MYH7; RYR2                                            | 14/349       | 3/349          | 17/349    |
| bta05414 | Dilated cardiomyopathy                               | 16    | 349   | 99/9095  | 9.71e-07 | 9.71e-07 | 1.30e-04 | 14          | ACTB; ACTG1; CACNA2D2; CACNB3; CACNG4; ITGA2B; ITGA6; ITGB6; SGCG; TGFB1; TGFB2; TGFB3; TNNT2; TPM4                             | 2             | MYH7; RYR2                                                  | 14/349       | 2/349          | 16/349    |
| bta05412 | Arrhythmogenic right ventricular cardiomyopathy      | 12    | 349   | 76/9095  | 2.85e-05 | 2.85e-05 | 2.54e-03 | 11          | ACTB; ACTG1; CACNA2D2; CACNB3; CACNG4; GJA1; ITGA2B; ITGA6; ITGB6; SGCG; TCF7L1                                                 | 1             | RYR2                                                        | 11/349       | 1/349          | 12/349    |
| bta04010 | MAPK signaling pathway                               | 25    | 349   | 292/9095 | 1.39e-04 | 1.39e-04 | 9.32e-03 | 17          | ANGPT2; CACNA1A; CACNA2D2; CACNB3; CACNG4; CD14; EPHA2; FGFR1; FGFR4; NR4A1; PAK1; PLA2G4B; RASGRP2; TGFB1; TGFB2; TGFB3; VEGFD | 8             | FGF1; FGF9; FLNC; HSPB1; MAP2K6; MAPKAPK3; RAPGEF2; RPS6KA3 | 17/349       | 8/349          | 25/349    |
| bta04350 | TGF-beta signaling pathway                           | 12    | 349   | 95/9095  | 2.61e-04 | 2.61e-04 | 1.40e-02 | 11          | CHRD; GREM1; ID1; ID3; INHBB; RGMA; SMAD6; SMAD7; TGFB1; TGFB2; TGFB3                                                           | 1             | ACVR2A                                                      | 11/349       | 1/349          | 12/349    |
| bta04933 | AGE-RAGE signaling pathway in diabetic complications | 12    | 349   | 103/9095 | 5.55e-04 | 5.55e-04 | 2.48e-02 | 9           | AGER; CCND1; COL4A3; NOS3; SERPINE1; TGFB1; TGFB2; TGFB3; VEGFD                                                                 | 3             | BCL2; DIAPH1; EDN1                                          | 9/349        | 3/349          | 12/349    |
| bta04015 | Rap1 signaling pathway                               | 19    | 349   | 217/9095 | 6.66e-04 | 6.66e-04 | 2.55e-02 | 14          | ACTB; ACTG1; ANGPT2; ARAP3; DOCK4; EPHA2; FGFR1; FGFR4; ID1; ITGA2B; PRKD2; RASGRP2; VASP; VEGFD                                | 5             | ENAH; FGF1; FGF9; MAP2K6; RAPGEF2                           | 14/349       | 5/349          | 19/349    |
| bta04510 | Focal adhesion                                       | 18    | 349   | 203/9095 | 7.92e-04 | 7.92e-04 | 2.65e-02 | 12          | ACTB; ACTG1; CCND1; COL4A3; ITGA2B; ITGA6; ITGB6; LAMA4; MYLK3; PAK1; VASP; VEGFD                                               | 6             | ARHGAP35; BCL2; DIAPH1; FLNC; ROCK2; THBS2                  | 12/349       | 6/349          | 18/349    |
| bta04330 | Notch signaling pathway                              | 8     | 349   | 58/9095  | 1.55e-03 | 1.55e-03 | 4.61e-02 | 8           | DLL1; DLL4; DTX3L; HEYL; LFNG; NOTCH1; NOTCH4; TLE3                                                                             | 0             | 0                                                           | 8/349        | 0/349          | 8/349     |
| bta04921 | Oxytocin signaling pathway                           | 14    | 349   | 153/9095 | 2.21e-03 | 2.21e-03 | 5.90e-02 | 12          | ACTB; ACTG1; CACNA2D2; CACNB3; CACNG4; CAMK1; CCND1; CD38; MYLK3; NOS3; OXTR; PLA2G4B                                           | 2             | ROCK2; RYR2                                                 | 12/349       | 2/349          | 14/349    |
| bta04810 | Regulation of actin cytoskeleton                     | 18    | 349   | 228/9095 | 2.93e-03 | 2.93e-03 | 6.98e-02 | 11          | ACTB; ACTG1; C8G; FGFR1; FGFR4; ITGA2B; ITGA6; ITGB6; MYLK3; PAK1; SCIN                                                         | 7             | ARHGAP35; DIAPH1; ENAH; FGF1; FGF9; MYH11; ROCK2            | 11/349       | 7/349          | 18/349    |
| bta05222 | Small cell lung cancer                               | 10    | 349   | 94/9095  | 3.13e-03 | 3.13e-03 | 6.98e-02 | 6           | CCND1; COL4A3; ITGA2B; ITGA6; LAMA4; RXRG                                                                                       | 4             | APAF1; BCL2; CKS2; NFKBIA                                   | 6/349        | 4/349          | 10/349    |
| bta00062 | Fatty acid elongation                                | 5     | 349   | 29/9095  | 4.49e-03 | 4.49e-03 | 9.23e-02 | 3           | ACOT7; ELOVL5; ELOVL7                                                                                                           | 4             | ACOT2; ACOT2; ACOT2; ACOT2                                  | 3/349        | 4/349          | 5/349     |
| bta01040 | Biosynthesis of unsaturated fatty acids              | 5     | 349   | 30/9095  | 5.22e-03 | 5.22e-03 | 9.97e-02 | 3           | ACOT7; ELOVL5; ELOVL7                                                                                                           | 4             | ACOT2; ACOT2; ACOT2; ACOT2                                  | 3/349        | 4/349          | 5/349     |
| bta04390 | Hippo signaling pathway                              | 13    | 349   | 156/9095 | 6.92e-03 | 6.92e-03 | 1.18e-01 | 12          | ACTB; ACTG1; CCND1; ID1; SERPINE1; SMAD7; SNAI2; TCF7L1; TGFB1; TGFB2; TGFB3; WNT9A                                             | 1             | FGF1                                                        | 12/349       | 1/349          | 13/349    |
| bta04611 | Platelet activation                                  | 11    | 349   | 122/9095 | 7.09e-03 | 7.09e-03 | 1.18e-01 | 9           | ACTB; ACTG1; FCGR2A; ITGA2B; MYLK3; NOS3; PLA2G4B; RASGRP2; VASP                                                                | 2             | ARHGAP35; ROCK2                                             | 9/349        | 2/349          | 11/349    |
| bta04666 | Fc gamma R-mediated phagocytosis                     | 9     | 349   | 97/9095  | 1.19e-02 | 1.19e-02 | 1.88e-01 | 8           | FCGR2A; MARCKSL1; PAK1; PLA2G4B; PLD2; PLPP2; SCIN; VASP                                                                        | 1             | GAB2                                                        | 8/349        | 1/349          | 9/349     |
| bta05221 | Acute myeloid leukemia                               | 7     | 349   | 68/9095  | 1.50e-02 | 1.50e-02 | 2.23e-01 | 6           | CCND1; CD14; PER2; PML; PPARD; TCF7L1                                                                                           | 1             | ZBTB16                                                      | 6/349        | 1/349          | 7/349     |
| bta00565 | Ether lipid metabolism                               | 6     | 349   | 54/9095  | 1.67e-02 | 1.67e-02 | 2.27e-01 | 5           | GDPD3; PLA2G4B; PLD2; PLPP2; TMEM86B                                                                                            | 1             | PLA2G7                                                      | 5/349        | 1/349          | 6/349     |
| bta04919 | Thyroid hormone signaling pathway                    | 10    | 349   | 121/9095 | 1.77e-02 | 1.77e-02 | 2.27e-01 | 7           | ACTB; ACTG1; CCND1; NOTCH1; NOTCH4; PFKFB2; RXRG                                                                                | 3             | ATP1B1; MYH7; RCAN2                                         | 7/349        | 3/349          | 10/349    |
| bta04142 | Lysosome                                             | 11    | 349   | 139/9095 | 1.78e-02 | 1.78e-02 | 2.27e-01 | 4           | ASAHI; CTSK; GM2A; LITAF                                                                                                        | 7             | AP4E1; ARSG; GNPTAB; IGF2R; NCOA7; SORT1; WDR7              | 4/349        | 7/349          | 11/349    |
| bta04530 | Tight junction                                       | 13    | 349   | 178/9095 | 1.94e-02 | 1.94e-02 | 2.35e-01 | 8           | ACTB; ACTG1; CCND1; MARVELD2; MICALL2; MPDZ; RAB8B; VASP                                                                        | 5             | MYH11; RAPGEF2; ROCK2; SYNPO; TUBA3E                        | 8/349        | 5/349          | 13/349    |
| bta04360 | Axon guidance                                        | 13    | 349   | 179/9095 | 2.02e-02 | 2.02e-02 | 2.35e-01 | 9           | EPHA2; PAK1; PLXNB3; RGMA; RND1; SEMA3F; SEMA4C; SEMA7A; UNC5B                                                                  | 4             | ENAH; NTN3; PTCH1; ROCK2                                    | 9/349        | 4/349          | 13/349    |

|          |                                                     |    |     |          |          |          |          |    |                                                                            |   |                                                                  |        |       |        |
|----------|-----------------------------------------------------|----|-----|----------|----------|----------|----------|----|----------------------------------------------------------------------------|---|------------------------------------------------------------------|--------|-------|--------|
| bta05132 | Salmonella infection                                | 17 | 349 | 261/9095 | 2.31e-02 | 2.31e-02 | 2.52e-01 | 8  | ACTB; ACTG1; CD14; MLKL; PAK1; PIK3C2B; TCF7L1; TUBB6                      | 9 | BCL2; FLNC; FYCO1; MAP2K6; NFKBIA; PLEKHM1; ROCK2; TUBA3E; VPS39 | 8/349  | 9/349 | 17/349 |
| bta05418 | Fluid shear stress and atherosclerosis              | 11 | 349 | 145/9095 | 2.36e-02 | 2.36e-02 | 2.52e-01 | 7  | ACTB; ACTG1; ITGA2B; KLF2; NOS3; NPPC; PLAT                                | 4 | ACVR2A; BCL2; EDN1; MAP2K6                                       | 7/349  | 4/349 | 11/349 |
| bta04260 | Cardiac muscle contraction                          | 8  | 349 | 93/9095  | 2.61e-02 | 2.61e-02 | 2.68e-01 | 5  | CACNA2D2; CACNB3; CACNG4; TNNT2; TPM4                                      | 3 | ATP1B1; MYH7; RYR2                                               | 5/349  | 3/349 | 8/349  |
| bta05224 | Breast cancer                                       | 11 | 349 | 150/9095 | 2.93e-02 | 2.93e-02 | 2.75e-01 | 9  | CCND1; DLL1; DLL4; FGFR1; HEYL; NOTCH1; NOTCH4; TCF7L1; WNT9A              | 2 | FGF1; FGF9                                                       | 9/349  | 2/349 | 11/349 |
| bta05416 | Viral myocarditis                                   | 7  | 349 | 78/9095  | 2.96e-02 | 2.96e-02 | 2.75e-01 | 6  | ACTB; ACTG1; CCND1; CD40; CD86; SGCG                                       | 1 | MYH7                                                             | 6/349  | 1/349 | 7/349  |
| bta00670 | One carbon pool by folate                           | 3  | 349 | 18/9095  | 2.98e-02 | 2.98e-02 | 2.75e-01 | 2  | AMT; MTHFR                                                                 | 1 | MTR                                                              | 2/349  | 1/349 | 3/349  |
| bta05145 | Toxoplasmosis                                       | 9  | 349 | 114/9095 | 3.09e-02 | 3.09e-02 | 2.75e-01 | 6  | CD40; ITGA6; LAMA4; TGFB1; TGFB2; TGFB3                                    | 3 | BCL2; MAP2K6; NFKBIA                                             | 6/349  | 3/349 | 9/349  |
| bta04020 | Calcium signaling pathway                           | 16 | 349 | 252/9095 | 3.31e-02 | 3.31e-02 | 2.79e-01 | 11 | CACNA1A; CAMK1; CD38; EDNRB; FGFR1; FGFR4; MYLK3; NOS3; OXTR; P2RX6; VEGFD | 5 | EDNRA; FGF1; FGF9; MCU; RYR2                                     | 11/349 | 5/349 | 16/349 |
| bta04115 | p53 signaling pathway                               | 7  | 349 | 80/9095  | 3.34e-02 | 3.34e-02 | 2.79e-01 | 4  | CCND1; RRM2; SERPINE1; SHISA5                                              | 3 | APAF1; BCL2; SESN1                                               | 4/349  | 3/349 | 7/349  |
| bta04621 | NOD-like receptor signaling pathway                 | 13 | 349 | 194/9095 | 3.59e-02 | 3.59e-02 | 2.91e-01 | 9  | GBP4; GBP4; GBP5; IFI16; IRF7; LOC512486; LOC781710; OAS1Y; OAS2           | 5 | BCL2; MCU; NAMPT; NFKBIA; TXNIP                                  | 9/349  | 5/349 | 13/349 |
| bta04071 | Sphingolipid signaling pathway                      | 9  | 349 | 120/9095 | 4.09e-02 | 4.09e-02 | 3.22e-01 | 5  | ASAHI; CERS1; NOS3; PLD2; SGPL1                                            | 4 | ABCC1; BCL2; GAB2; ROCK2                                         | 5/349  | 4/349 | 9/349  |
| bta04270 | Vascular smooth muscle contraction                  | 10 | 349 | 140/9095 | 4.28e-02 | 4.28e-02 | 3.25e-01 | 3  | MYLK3; NPPC; PLA2G4B                                                       | 7 | EDN1; EDNRA; KCNMA1; KCNMB4; MYH11; PPP1R14A; ROCK2              | 3/349  | 7/349 | 10/349 |
| bta05162 | Measles                                             | 11 | 349 | 160/9095 | 4.38e-02 | 4.38e-02 | 3.25e-01 | 8  | CCND1; DDX58; IFIH1; IRF7; MX1; MX2; OAS1Y; OAS2                           | 3 | APAF1; BCL2; NFKBIA                                              | 8/349  | 3/349 | 11/349 |
| bta04928 | Parathyroid hormone synthesis, secretion and action | 8  | 349 | 105/9095 | 4.84e-02 | 4.84e-02 | 3.43e-01 | 7  | FGFR1; MMP17; MMP25; NR4A2; PDE4C; PLD2; RXRG                              | 1 | BCL2                                                             | 7/349  | 1/349 | 8/349  |
| bta04152 | AMPK signaling pathway                              | 9  | 349 | 124/9095 | 4.87e-02 | 4.87e-02 | 3.43e-01 | 3  | CCND1; PFKFB1; PFKFB2                                                      | 6 | ADIPOR2; CAB39; FOXO3; MLYCD; PFKFB4; ULK1                       | 3/349  | 6/349 | 9/349  |

#### 4. Enriched KEGG pathways to DEG prospect in T2 vs T1 into early weaning group

| ID       | Description                                      | count | terms | BgRatio  | pvalue   | p.adjust | qvalue   | Count.UpReg | geneID.UpReg                                                         | Count.DownReg | geneID.DownReg                                                            | GeneRatio.Up | GeneRatio.Down | GeneRatio |
|----------|--------------------------------------------------|-------|-------|----------|----------|----------|----------|-------------|----------------------------------------------------------------------|---------------|---------------------------------------------------------------------------|--------------|----------------|-----------|
| bta01212 | Fatty acid metabolism                            | 16    | 270   | 58/9095  | 6.11e-12 | 6.11e-12 | 1.57e-09 | 7           | ACACA; ELOVL6; FADS1; FADS2; FASN; HSD17B12; SCD                     | 9             | ACADM; ACADS; ACADVL; ACAT1; ACOX3; CPT1A; CPT1B; CPT2; HADHA             | 7/270        | 9/270          | 16/270    |
| bta03320 | PPAR signaling pathway                           | 16    | 270   | 84/9095  | 2.44e-09 | 2.44e-09 | 3.13e-07 | 7           | ADIPOQ; FABP4; FADS2; PCK2; PLIN1; RXRG; SCD                         | 9             | ACADM; ACOX3; ANGPTL4; CPT1A; CPT1B; CPT2; FABP3; PLIN5; SLC27A1          | 7/270        | 9/270          | 16/270    |
| bta00650 | Butanoate metabolism                             | 8     | 270   | 27/9095  | 7.40e-07 | 7.40e-07 | 6.33e-05 | 5           | AACS; ACSM1; ACSM5; BDH1; HMGCLL1                                    | 3             | ACADS; ACAT1; HADHA                                                       | 5/270        | 3/270          | 8/270     |
| bta01040 | Biosynthesis of unsaturated fatty acids          | 8     | 270   | 30/9095  | 1.80e-06 | 1.80e-06 | 1.16e-04 | 5           | ELOVL6; FADS1; FADS2; HSD17B12; SCD                                  | 5             | ACOT2; ACOT2; ACOT2; ACOX3                                                | 5/270        | 5/270          | 8/270     |
| bta00071 | Fatty acid degradation                           | 9     | 270   | 44/9095  | 4.47e-06 | 4.47e-06 | 2.29e-04 | 0           | 0                                                                    | 9             | ACADM; ACADS; ACADVL; ACAT1; ACOX3; CPT1A; CPT1B; CPT2; HADHA             | 0/270        | 9/270          | 9/270     |
| bta04936 | Alcoholic liver disease                          | 16    | 270   | 154/9095 | 1.26e-05 | 1.26e-05 | 5.40e-04 | 6           | ACACA; ADIPOQ; FASN; PRKAG3; SCD; SREBF1                             | 10            | ACADM; ACADVL; ACOX3; ADIPOR2; CPT1A; CPT1B; CXCL3; IL17RA; MAP2K6; MLYCD | 6/270        | 10/270         | 16/270    |
| bta04152 | AMPK signaling pathway                           | 14    | 270   | 124/9095 | 1.72e-05 | 1.72e-05 | 6.32e-04 | 7           | ACACA; ADIPOQ; FASN; PCK2; PRKAG3; SCD; SREBF1                       | 7             | ADIPOR2; CPT1A; CPT1B; FBP2; IGF1R; MLYCD; RPTOR                          | 7/270        | 7/270          | 14/270    |
| bta00640 | Propanoate metabolism                            | 7     | 270   | 31/9095  | 2.68e-05 | 2.68e-05 | 8.61e-04 | 3           | ACACA; ACSS2; DBT                                                    | 4             | ACADS; ACOX3; HADHA; MLYCD                                                | 3/270        | 4/270          | 7/270     |
| bta00533 | Glycosaminoglycan biosynthesis - keratan sulfate | 5     | 270   | 15/9095  | 5.23e-05 | 5.23e-05 | 1.49e-03 | 3           | B4GALT2; B4GALT4; CHST1                                              | 2             | ST3GAL1; ST3GAL2                                                          | 3/270        | 2/270          | 5/270     |
| bta00280 | Valine, leucine and isoleucine degradation       | 8     | 270   | 51/9095  | 1.14e-04 | 1.14e-04 | 2.94e-03 | 4           | AACS; DBT; HMGCLL1; MCCCC1                                           | 4             | ACADM; ACADS; ACAT1; HADHA                                                | 4/270        | 4/270          | 8/270     |
| bta04710 | Circadian rhythm                                 | 6     | 270   | 35/9095  | 5.09e-04 | 5.09e-04 | 1.19e-02 | 5           | DBP; NR1D1; NR1D2; PER2; PRKAG3                                      | 1             | ARNTL                                                                     | 5/270        | 1/270          | 6/270     |
| bta05202 | Transcriptional misregulation in cancer          | 15    | 270   | 200/9095 | 8.88e-04 | 8.88e-04 | 1.90e-02 | 10          | CCNT2; CDKN2C; ETV5; LOC536229; MEF2C; NGFR; NR4A3; PER2; PLAT; RXRG | 5             | BCL6; GADD45A; IGF1R; MYC; SIX1                                           | 10/270       | 5/270          | 15/270    |
| bta04010 | MAPK signaling pathway                           | 19    | 270   | 292/9095 | 1.09e-03 | 1.09e-03 | 2.16e-02 | 9           | CACNA1A; CACNA1G; CACNG4; FGF2; FLT4; MEF2C; NGFR; NTRK2; TGFB2      | 10            | DUSP1; DUSP7; FLNC; GADD45A; HSPA8; IGF1R; MAP2K6; MAP3K13; MAPKAPK3; MYC | 9/270        | 10/270         | 19/270    |
| bta00062 | Fatty acid elongation                            | 5     | 270   | 29/9095  | 1.47e-03 | 1.47e-03 | 2.70e-02 | 2           | ELOVL6; HSD17B12                                                     | 5             | ACOT2; ACOT2; ACOT2; ACOT2; HADHA                                         | 2/270        | 5/270          | 5/270     |
| bta04931 | Insulin resistance                               | 9     | 270   | 110/9095 | 5.33e-03 | 5.33e-03 | 8.57e-02 | 4           | PCK2; PPP1R3C; PRKAG3; SREBF1                                        | 5             | CPT1A; CPT1B; PPARGC1B; PYGB; SLC27A1                                     | 4/270        | 5/270          | 9/270     |
| bta04920 | Adipocytokine signaling pathway                  | 7     | 270   | 72/9095  | 5.34e-03 | 5.34e-03 | 8.57e-02 | 4           | ADIPOQ; PCK2; PRKAG3; RXRG                                           | 3             | ADIPOR2; CPT1A; CPT1B                                                     | 4/270        | 3/270          | 7/270     |
| bta04922 | Glucagon signaling pathway                       | 8     | 270   | 103/9095 | 1.14e-02 | 1.14e-02 | 1.72e-01 | 3           | ACACA; PCK2; PRKAG3                                                  | 5             | CPT1A; CPT1B; FBP2; PYGB; SIK2                                            | 3/270        | 5/270          | 8/270     |
| bta00380 | Tryptophan metabolism                            | 5     | 270   | 48/9095  | 1.34e-02 | 1.34e-02 | 1.92e-01 | 1           | LOC104968656                                                         | 4             | ACAT1; DDC; HADHA; MAOA                                                   | 1/270        | 4/270          | 5/270     |
| bta04211 | Longevity regulating pathway                     | 7     | 270   | 90/9095  | 1.73e-02 | 1.73e-02 | 2.25e-01 | 3           | ADIPOQ; PRKAG3; SESN3                                                | 4             | ADIPOR2; IGF1R; RPTOR; SESN1                                              | 3/270        | 4/270          | 7/270     |
| bta00410 | beta-Alanine metabolism                          | 4     | 270   | 34/9095  | 1.75e-02 | 1.75e-02 | 2.25e-01 | 0           | 0                                                                    | 4             | ACADS; ACOX3; HADHA; MLYCD                                                | 0/270        | 4/270          | 4/270     |
| bta00100 | Steroid biosynthesis                             | 3     | 270   | 20/9095  | 2.03e-02 | 2.03e-02 | 2.41e-01 | 2           | CYP51A1; LSS                                                         | 1             | CYP2R1                                                                    | 2/270        | 1/270          | 3/270     |
| bta05222 | Small cell lung cancer                           | 7     | 270   | 94/9095  | 2.15e-02 | 2.15e-02 | 2.41e-01 | 2           | COL4A3; RXRG                                                         | 5             | BCL2; CKS2; COL4A1; GADD45A; MYC                                          | 2/270        | 5/270          | 7/270     |
| bta04910 | Insulin signaling pathway                        | 9     | 270   | 138/9095 | 2.16e-02 | 2.16e-02 | 2.41e-01 | 6           | ACACA; FASN; PCK2; PPP1R3C; PRKAG3; SREBF1                           | 3             | FBP2; PYGB; RPTOR                                                         | 6/270        | 3/270          | 9/270     |
| bta00760 | Nicotinate and nicotinamide metabolism           | 4     | 270   | 37/9095  | 2.33e-02 | 2.33e-02 | 2.49e-01 | 2           | NAPRT; NT5E                                                          | 2             | NAMPT; NMRK2                                                              | 2/270        | 2/270          | 4/270     |

|          |                                         |   |     |          |          |          |          |   |                                           |   |                                      |       |       |       |
|----------|-----------------------------------------|---|-----|----------|----------|----------|----------|---|-------------------------------------------|---|--------------------------------------|-------|-------|-------|
| bta04964 | Proximal tubule bicarbonate reclamation | 3 | 270 | 22/9095  | 2.63e-02 | 2.63e-02 | 2.70e-01 | 2 | <i>ATP1A4; PCK2</i>                       | 1 | <i>SLC4A4</i>                        | 2/270 | 1/270 | 3/270 |
| bta05418 | Fluid shear stress and atherosclerosis  | 9 | 270 | 145/9095 | 2.86e-02 | 2.86e-02 | 2.82e-01 | 5 | <i>BMPRI1B; GSTM3; MEF2C; MGST1; PLAT</i> | 4 | <i>BCL2; DUSP1; HSP90AB1; MAP2K6</i> | 5/270 | 4/270 | 9/270 |
| bta04923 | Regulation of lipolysis in adipocytes   | 5 | 270 | 59/9095  | 3.02e-02 | 3.02e-02 | 2.88e-01 | 3 | <i>CIDEA; FABP4; PLIN1</i>                | 2 | <i>ADORA1; MGLL</i>                  | 3/270 | 2/270 | 5/270 |
| bta00480 | Glutathione metabolism                  | 5 | 270 | 62/9095  | 3.64e-02 | 3.64e-02 | 3.34e-01 | 4 | <i>ANPEP; GSS; GSTM3; MGST1</i>           | 1 | <i>ODC1</i>                          | 4/270 | 1/270 | 5/270 |
| bta04614 | Renin-angiotensin system                | 3 | 270 | 26/9095  | 4.07e-02 | 4.07e-02 | 3.49e-01 | 1 | <i>ANPEP</i>                              | 2 | <i>AGTR1; LNPEP</i>                  | 1/270 | 2/270 | 3/270 |
| bta00620 | Pyruvate metabolism                     | 4 | 270 | 44/9095  | 4.07e-02 | 4.07e-02 | 3.49e-01 | 3 | <i>ACACA; ACSS2; PCK2</i>                 | 1 | <i>ACAT1</i>                         | 3/270 | 1/270 | 4/270 |
| bta04977 | Vitamin digestion and absorption        | 3 | 270 | 27/9095  | 4.48e-02 | 4.48e-02 | 3.71e-01 | 2 | <i>SLC19A2; SLC46A1</i>                   | 1 | <i>LOC100337457</i>                  | 2/270 | 1/270 | 3/270 |
| bta01200 | Carbon metabolism                       | 7 | 270 | 112/9095 | 4.88e-02 | 4.88e-02 | 3.86e-01 | 3 | <i>ACSS2; GLDC; PRPS2</i>                 | 4 | <i>ACADS; ACAT1; ACOX3; FBP2</i>     | 3/270 | 4/270 | 7/270 |
