# Supplementary material for: Early Weaning Possibly Increases the Activity of Lipogenic and Adipogenic Pathways in Intramuscular Adipose Tissue of Nellore Calves
Source: MDPI journal article supplement (doi:10.3390/metabo13091028), 2023-09-21
Supplement: s1 [file s1]

1. Enriched Biological Process of Gene Ontology terms to DEG prospect in EW vs CW into time 1

| ID         | Description                                                             | count | terms | BgRatio  | pvalue   | p.adjust | qvalue   | Count.UpReg | geneID.UpReg                | Count.DownReg | geneID.DownReg | GeneRatio.Up | GeneRatio.Down | GeneRatio |
|------------|-------------------------------------------------------------------------|-------|-------|----------|----------|----------|----------|-------------|-----------------------------|---------------|----------------|--------------|----------------|-----------|
| GO:0045597 | positive regulation of cell differentiation                             | 4     | 8     | 117/3649 | 6.36e-05 | 6.36e-05 | 1.65e-02 | 4           | MAMSTR; MYOD1; RAB7B; ZFP36 | 0             | 0              | 4/8          | 0/8            | 4/8       |
| GO:0051094 | positive regulation of developmental process                            | 4     | 8     | 174/3649 | 3.01e-04 | 3.01e-04 | 2.81e-02 | 4           | MAMSTR; MYOD1; RAB7B; ZFP36 | 0             | 0              | 4/8          | 0/8            | 4/8       |
| GO:0051149 | positive regulation of muscle cell differentiation                      | 2     | 8     | 13/3649  | 3.24e-04 | 3.24e-04 | 2.81e-02 | 2           | MAMSTR; MYOD1               | 0             | 0              | 2/8          | 0/8            | 2/8       |
| GO:0045595 | regulation of cell differentiation                                      | 4     | 8     | 199/3649 | 5.05e-04 | 5.05e-04 | 3.28e-02 | 4           | MAMSTR; MYOD1; RAB7B; ZFP36 | 0             | 0              | 4/8          | 0/8            | 4/8       |
| GO:0051147 | regulation of muscle cell differentiation                               | 2     | 8     | 19/3649  | 7.06e-04 | 7.06e-04 | 3.67e-02 | 2           | MAMSTR; MYOD1               | 0             | 0              | 2/8          | 0/8            | 2/8       |
| GO:0045637 | regulation of myeloid cell differentiation                              | 2     | 8     | 35/3649  | 2.41e-03 | 2.41e-03 | 1.05e-01 | 2           | RAB7B; ZFP36                | 0             | 0              | 2/8          | 0/8            | 2/8       |
| GO:0050793 | regulation of developmental process                                     | 4     | 8     | 338/3649 | 3.74e-03 | 3.74e-03 | 1.32e-01 | 4           | MAMSTR; MYOD1; RAB7B; ZFP36 | 0             | 0              | 4/8          | 0/8            | 4/8       |
| GO:0051146 | striated muscle cell differentiation                                    | 2     | 8     | 47/3649  | 4.33e-03 | 4.33e-03 | 1.32e-01 | 2           | MAMSTR; MYOD1               | 0             | 0              | 2/8          | 0/8            | 2/8       |
| GO:2000026 | regulation of multicellular organismal development                      | 3     | 8     | 182/3649 | 5.68e-03 | 5.68e-03 | 1.32e-01 | 3           | MYOD1; RAB7B; ZFP36         | 0             | 0              | 3/8          | 0/8            | 3/8       |
| GO:1903311 | regulation of mRNA metabolic process                                    | 2     | 8     | 55/3649  | 5.89e-03 | 5.89e-03 | 1.32e-01 | 2           | MYOD1; ZFP36                | 0             | 0              | 2/8          | 0/8            | 2/8       |
| GO:0030099 | myeloid cell differentiation                                            | 2     | 8     | 62/3649  | 7.45e-03 | 7.45e-03 | 1.32e-01 | 2           | RAB7B; ZFP36                | 0             | 0              | 2/8          | 0/8            | 2/8       |
| GO:1903706 | regulation of hemopoiesis                                               | 2     | 8     | 62/3649  | 7.45e-03 | 7.45e-03 | 1.32e-01 | 2           | RAB7B; ZFP36                | 0             | 0              | 2/8          | 0/8            | 2/8       |
| GO:0042692 | muscle cell differentiation                                             | 2     | 8     | 65/3649  | 8.16e-03 | 8.16e-03 | 1.32e-01 | 2           | MAMSTR; MYOD1               | 0             | 0              | 2/8          | 0/8            | 2/8       |
| GO:0071396 | cellular response to lipid                                              | 2     | 8     | 79/3649  | 1.19e-02 | 1.19e-02 | 1.32e-01 | 2           | MYOD1; ZFP36                | 0             | 0              | 2/8          | 0/8            | 2/8       |
| GO:0070887 | cellular response to chemical stimulus                                  | 4     | 8     | 483/3649 | 1.37e-02 | 1.37e-02 | 1.32e-01 | 4           | HBB; MYOD1; RAB7B; ZFP36    | 0             | 0              | 4/8          | 0/8            | 4/8       |
| GO:0051252 | regulation of RNA metabolic process                                     | 4     | 8     | 484/3649 | 1.38e-02 | 1.38e-02 | 1.32e-01 | 4           | MAMSTR; MYOD1; RAB7B; ZFP36 | 0             | 0              | 4/8          | 0/8            | 4/8       |
| GO:0071407 | cellular response to organic cyclic compound                            | 2     | 8     | 86/3649  | 1.40e-02 | 1.40e-02 | 1.32e-01 | 2           | MYOD1; ZFP36                | 0             | 0              | 2/8          | 0/8            | 2/8       |
| GO:0051254 | positive regulation of RNA metabolic process                            | 3     | 8     | 253/3649 | 1.42e-02 | 1.42e-02 | 1.32e-01 | 3           | MAMSTR; MYOD1; ZFP36        | 0             | 0              | 3/8          | 0/8            | 3/8       |
| GO:0014070 | response to organic cyclic compound                                     | 2     | 8     | 104/3649 | 2.01e-02 | 2.01e-02 | 1.32e-01 | 2           | MYOD1; ZFP36                | 0             | 0              | 2/8          | 0/8            | 2/8       |
| GO:0033993 | response to lipid                                                       | 2     | 8     | 106/3649 | 2.09e-02 | 2.09e-02 | 1.32e-01 | 2           | MYOD1; ZFP36                | 0             | 0              | 2/8          | 0/8            | 2/8       |
| GO:0009081 | branched-chain amino acid metabolic process                             | 1     | 8     | 10/3649  | 2.17e-02 | 2.17e-02 | 1.32e-01 | 0           | 0                           | 1             | DBT            | 0/8          | 1/8            | 1/8       |
| GO:0030219 | megakaryocyte differentiation                                           | 1     | 8     | 10/3649  | 2.17e-02 | 2.17e-02 | 1.32e-01 | 1           | RAB7B                       | 0             | 0              | 1/8          | 0/8            | 1/8       |
| GO:0031960 | response to corticosteroid                                              | 1     | 8     | 10/3649  | 2.17e-02 | 2.17e-02 | 1.32e-01 | 1           | ZFP36                       | 0             | 0              | 1/8          | 0/8            | 1/8       |
| GO:0032623 | interleukin-2 production                                                | 1     | 8     | 10/3649  | 2.17e-02 | 2.17e-02 | 1.32e-01 | 1           | ZFP36                       | 0             | 0              | 1/8          | 0/8            | 1/8       |
| GO:0032663 | regulation of interleukin-2 production                                  | 1     | 8     | 10/3649  | 2.17e-02 | 2.17e-02 | 1.32e-01 | 1           | ZFP36                       | 0             | 0              | 1/8          | 0/8            | 1/8       |
| GO:0045646 | regulation of erythrocyte differentiation                               | 1     | 8     | 10/3649  | 2.17e-02 | 2.17e-02 | 1.32e-01 | 1           | ZFP36                       | 0             | 0              | 1/8          | 0/8            | 1/8       |
| GO:0051155 | positive regulation of striated muscle cell differentiation             | 1     | 8     | 10/3649  | 2.17e-02 | 2.17e-02 | 1.32e-01 | 1           | MAMSTR                      | 0             | 0              | 1/8          | 0/8            | 1/8       |
| GO:0051384 | response to glucocorticoid                                              | 1     | 8     | 10/3649  | 2.17e-02 | 2.17e-02 | 1.32e-01 | 1           | ZFP36                       | 0             | 0              | 1/8          | 0/8            | 1/8       |
| GO:0060966 | regulation of gene silencing by RNA                                     | 1     | 8     | 10/3649  | 2.17e-02 | 2.17e-02 | 1.32e-01 | 1           | ZFP36                       | 0             | 0              | 1/8          | 0/8            | 1/8       |
| GO:0098781 | ncRNA transcription                                                     | 1     | 8     | 10/3649  | 2.17e-02 | 2.17e-02 | 1.32e-01 | 1           | MYOD1                       | 0             | 0              | 1/8          | 0/8            | 1/8       |
| GO:0061061 | muscle structure development                                            | 2     | 8     | 109/3649 | 2.20e-02 | 2.20e-02 | 1.32e-01 | 2           | MAMSTR; MYOD1               | 0             | 0              | 2/8          | 0/8            | 2/8       |
| GO:0045935 | positive regulation of nucleobase-containing compound metabolic process | 3     | 8     | 298/3649 | 2.22e-02 | 2.22e-02 | 1.32e-01 | 3           | MAMSTR; MYOD1; ZFP36        | 0             | 0              | 3/8          | 0/8            | 3/8       |
| GO:0019233 | sensory perception of pain                                              | 1     | 8     | 11/3649  | 2.39e-02 | 2.39e-02 | 1.32e-01 | 0           | 0                           | 1             | RETREG1        | 0/8          | 1/8            | 1/8       |
| GO:0030216 | keratinocyte differentiation                                            | 1     | 8     | 11/3649  | 2.39e-02 | 2.39e-02 | 1.32e-01 | 1           | ZFP36                       | 0             | 0              | 1/8          | 0/8            | 1/8       |
| GO:0038066 | p38MAPK cascade                                                         | 1     | 8     | 11/3649  | 2.39e-02 | 2.39e-02 | 1.32e-01 | 1           | ZFP36                       | 0             | 0              | 1/8          | 0/8            | 1/8       |
| GO:0043403 | skeletal muscle tissue regeneration                                     | 1     | 8     | 11/3649  | 2.39e-02 | 2.39e-02 | 1.32e-01 | 1           | MYOD1                       | 0             | 0              | 1/8          | 0/8            | 1/8       |
| GO:1904019 | epithelial cell apoptotic process                                       | 1     | 8     | 11/3649  | 2.39e-02 | 2.39e-02 | 1.32e-01 | 1           | ZFP36                       | 0             | 0              | 1/8          | 0/8            | 1/8       |
| GO:0001817 | regulation of cytokine production                                       | 2     | 8     | 116/3649 | 2.47e-02 | 2.47e-02 | 1.32e-01 | 2           | RAB7B; ZFP36                | 0             | 0              | 2/8          | 0/8            | 2/8       |

|            |                                                           |   |   |          |          |          |          |   |                            |   |   |     |     |     |
|------------|-----------------------------------------------------------|---|---|----------|----------|----------|----------|---|----------------------------|---|---|-----|-----|-----|
| GO:0001816 | cytokine production                                       | 2 | 8 | 118/3649 | 2.56e-02 | 2.56e-02 | 1.32e-01 | 2 | <i>RAB7B; ZFP36</i>        | 0 | 0 | 2/8 | 0/8 | 2/8 |
| GO:0043966 | histone H3 acetylation                                    | 1 | 8 | 12/3649  | 2.60e-02 | 2.60e-02 | 1.32e-01 | 1 | <i>MYOD1</i>               | 0 | 0 | 1/8 | 0/8 | 1/8 |
| GO:0048525 | negative regulation of viral process                      | 1 | 8 | 12/3649  | 2.60e-02 | 2.60e-02 | 1.32e-01 | 1 | <i>ZFP36</i>               | 0 | 0 | 1/8 | 0/8 | 1/8 |
| GO:0051153 | regulation of striated muscle cell differentiation        | 1 | 8 | 12/3649  | 2.60e-02 | 2.60e-02 | 1.32e-01 | 1 | <i>MAMSTR</i>              | 0 | 0 | 1/8 | 0/8 | 1/8 |
| GO:0000381 | regulation of alternative mRNA splicing, via spliceosome  | 1 | 8 | 13/3649  | 2.82e-02 | 2.82e-02 | 1.32e-01 | 1 | <i>MYOD1</i>               | 0 | 0 | 1/8 | 0/8 | 1/8 |
| GO:0019083 | viral transcription                                       | 1 | 8 | 13/3649  | 2.82e-02 | 2.82e-02 | 1.32e-01 | 1 | <i>ZFP36</i>               | 0 | 0 | 1/8 | 0/8 | 1/8 |
| GO:0071346 | cellular response to interferon-gamma                     | 1 | 8 | 13/3649  | 2.82e-02 | 2.82e-02 | 1.32e-01 | 1 | <i>RAB7B</i>               | 0 | 0 | 1/8 | 0/8 | 1/8 |
| GO:0071345 | cellular response to cytokine stimulus                    | 2 | 8 | 125/3649 | 2.85e-02 | 2.85e-02 | 1.32e-01 | 2 | <i>RAB7B; ZFP36</i>        | 0 | 0 | 2/8 | 0/8 | 2/8 |
| GO:0043967 | histone H4 acetylation                                    | 1 | 8 | 14/3649  | 3.03e-02 | 3.03e-02 | 1.32e-01 | 1 | <i>MYOD1</i>               | 0 | 0 | 1/8 | 0/8 | 1/8 |
| GO:0061157 | mRNA destabilization                                      | 1 | 8 | 14/3649  | 3.03e-02 | 3.03e-02 | 1.32e-01 | 1 | <i>ZFP36</i>               | 0 | 0 | 1/8 | 0/8 | 1/8 |
| GO:1903312 | negative regulation of mRNA metabolic process             | 1 | 8 | 14/3649  | 3.03e-02 | 3.03e-02 | 1.32e-01 | 1 | <i>ZFP36</i>               | 0 | 0 | 1/8 | 0/8 | 1/8 |
| GO:0030097 | hemopoiesis                                               | 2 | 8 | 130/3649 | 3.06e-02 | 3.06e-02 | 1.32e-01 | 2 | <i>RAB7B; ZFP36</i>        | 0 | 0 | 2/8 | 0/8 | 2/8 |
| GO:0044344 | cellular response to fibroblast growth factor stimulus    | 1 | 8 | 15/3649  | 3.24e-02 | 3.24e-02 | 1.32e-01 | 1 | <i>ZFP36</i>               | 0 | 0 | 1/8 | 0/8 | 1/8 |
| GO:0045638 | negative regulation of myeloid cell differentiation       | 1 | 8 | 15/3649  | 3.24e-02 | 3.24e-02 | 1.32e-01 | 1 | <i>ZFP36</i>               | 0 | 0 | 1/8 | 0/8 | 1/8 |
| GO:0050779 | RNA destabilization                                       | 1 | 8 | 15/3649  | 3.24e-02 | 3.24e-02 | 1.32e-01 | 1 | <i>ZFP36</i>               | 0 | 0 | 1/8 | 0/8 | 1/8 |
| GO:0071774 | response to fibroblast growth factor                      | 1 | 8 | 15/3649  | 3.24e-02 | 3.24e-02 | 1.32e-01 | 1 | <i>ZFP36</i>               | 0 | 0 | 1/8 | 0/8 | 1/8 |
| GO:0071310 | cellular response to organic substance                    | 3 | 8 | 346/3649 | 3.30e-02 | 3.30e-02 | 1.32e-01 | 3 | <i>MYOD1; RAB7B; ZFP36</i> | 0 | 0 | 3/8 | 0/8 | 3/8 |
| GO:0034097 | response to cytokine                                      | 2 | 8 | 136/3649 | 3.33e-02 | 3.33e-02 | 1.32e-01 | 2 | <i>RAB7B; ZFP36</i>        | 0 | 0 | 2/8 | 0/8 | 2/8 |
| GO:0048534 | hematopoietic or lymphoid organ development               | 2 | 8 | 136/3649 | 3.33e-02 | 3.33e-02 | 1.32e-01 | 2 | <i>RAB7B; ZFP36</i>        | 0 | 0 | 2/8 | 0/8 | 2/8 |
| GO:0042246 | tissue regeneration                                       | 1 | 8 | 16/3649  | 3.46e-02 | 3.46e-02 | 1.32e-01 | 1 | <i>MYOD1</i>               | 0 | 0 | 1/8 | 0/8 | 1/8 |
| GO:0045445 | myoblast differentiation                                  | 1 | 8 | 16/3649  | 3.46e-02 | 3.46e-02 | 1.32e-01 | 1 | <i>MYOD1</i>               | 0 | 0 | 1/8 | 0/8 | 1/8 |
| GO:0045944 | positive regulation of transcription by RNA polymerase II | 2 | 8 | 142/3649 | 3.61e-02 | 3.61e-02 | 1.32e-01 | 2 | <i>MAMSTR; MYOD1</i>       | 0 | 0 | 2/8 | 0/8 | 2/8 |
| GO:0002520 | immune system development                                 | 2 | 8 | 143/3649 | 3.66e-02 | 3.66e-02 | 1.32e-01 | 2 | <i>RAB7B; ZFP36</i>        | 0 | 0 | 2/8 | 0/8 | 2/8 |
| GO:0032755 | positive regulation of interleukin-6 production           | 1 | 8 | 17/3649  | 3.67e-02 | 3.67e-02 | 1.32e-01 | 1 | <i>RAB7B</i>               | 0 | 0 | 1/8 | 0/8 | 1/8 |
| GO:0034121 | regulation of toll-like receptor signaling pathway        | 1 | 8 | 17/3649  | 3.67e-02 | 3.67e-02 | 1.32e-01 | 1 | <i>RAB7B</i>               | 0 | 0 | 1/8 | 0/8 | 1/8 |
| GO:0034341 | response to interferon-gamma                              | 1 | 8 | 17/3649  | 3.67e-02 | 3.67e-02 | 1.32e-01 | 1 | <i>RAB7B</i>               | 0 | 0 | 1/8 | 0/8 | 1/8 |
| GO:0042147 | retrograde transport, endosome to Golgi                   | 1 | 8 | 17/3649  | 3.67e-02 | 3.67e-02 | 1.32e-01 | 1 | <i>RAB7B</i>               | 0 | 0 | 1/8 | 0/8 | 1/8 |
| GO:0045600 | positive regulation of fat cell differentiation           | 1 | 8 | 17/3649  | 3.67e-02 | 3.67e-02 | 1.32e-01 | 1 | <i>ZFP36</i>               | 0 | 0 | 1/8 | 0/8 | 1/8 |
| GO:0045639 | positive regulation of myeloid cell differentiation       | 1 | 8 | 17/3649  | 3.67e-02 | 3.67e-02 | 1.32e-01 | 1 | <i>RAB7B</i>               | 0 | 0 | 1/8 | 0/8 | 1/8 |
| GO:0061014 | positive regulation of mRNA catabolic process             | 1 | 8 | 17/3649  | 3.67e-02 | 3.67e-02 | 1.32e-01 | 1 | <i>ZFP36</i>               | 0 | 0 | 1/8 | 0/8 | 1/8 |
| GO:0031099 | regeneration                                              | 1 | 8 | 18/3649  | 3.88e-02 | 3.88e-02 | 1.32e-01 | 1 | <i>MYOD1</i>               | 0 | 0 | 1/8 | 0/8 | 1/8 |
| GO:0032635 | interleukin-6 production                                  | 1 | 8 | 18/3649  | 3.88e-02 | 3.88e-02 | 1.32e-01 | 1 | <i>RAB7B</i>               | 0 | 0 | 1/8 | 0/8 | 1/8 |
| GO:0032675 | regulation of interleukin-6 production                    | 1 | 8 | 18/3649  | 3.88e-02 | 3.88e-02 | 1.32e-01 | 1 | <i>RAB7B</i>               | 0 | 0 | 1/8 | 0/8 | 1/8 |
| GO:0000380 | alternative mRNA splicing, via spliceosome                | 1 | 8 | 19/3649  | 4.09e-02 | 4.09e-02 | 1.32e-01 | 1 | <i>MYOD1</i>               | 0 | 0 | 1/8 | 0/8 | 1/8 |
| GO:0009913 | epidermal cell differentiation                            | 1 | 8 | 19/3649  | 4.09e-02 | 4.09e-02 | 1.32e-01 | 1 | <i>ZFP36</i>               | 0 | 0 | 1/8 | 0/8 | 1/8 |
| GO:0048639 | positive regulation of developmental growth               | 1 | 8 | 19/3649  | 4.09e-02 | 4.09e-02 | 1.32e-01 | 1 | <i>MYOD1</i>               | 0 | 0 | 1/8 | 0/8 | 1/8 |
| GO:0019080 | viral gene expression                                     | 1 | 8 | 20/3649  | 4.31e-02 | 4.31e-02 | 1.32e-01 | 1 | <i>ZFP36</i>               | 0 | 0 | 1/8 | 0/8 | 1/8 |
| GO:0030856 | regulation of epithelial cell differentiation             | 1 | 8 | 20/3649  | 4.31e-02 | 4.31e-02 | 1.32e-01 | 1 | <i>ZFP36</i>               | 0 | 0 | 1/8 | 0/8 | 1/8 |
| GO:0032640 | tumor necrosis factor production                          | 1 | 8 | 20/3649  | 4.31e-02 | 4.31e-02 | 1.32e-01 | 1 | <i>ZFP36</i>               | 0 | 0 | 1/8 | 0/8 | 1/8 |
| GO:0032680 | regulation of tumor necrosis factor production            | 1 | 8 | 20/3649  | 4.31e-02 | 4.31e-02 | 1.32e-01 | 1 | <i>ZFP36</i>               | 0 | 0 | 1/8 | 0/8 | 1/8 |

|            |                                                                     |   |   |          |          |          |          |   |                            |   |         |     |     |     |
|------------|---------------------------------------------------------------------|---|---|----------|----------|----------|----------|---|----------------------------|---|---------|-----|-----|-----|
| GO:0035195 | miRNA-mediated gene silencing                                       | 1 | 8 | 20/3649  | 4.31e-02 | 4.31e-02 | 1.32e-01 | 1 | <i>ZFP36</i>               | 0 | 0       | 1/8 | 0/8 | 1/8 |
| GO:0048024 | regulation of mRNA splicing, via spliceosome                        | 1 | 8 | 20/3649  | 4.31e-02 | 4.31e-02 | 1.32e-01 | 1 | <i>MYOD1</i>               | 0 | 0       | 1/8 | 0/8 | 1/8 |
| GO:0071706 | tumor necrosis factor superfamily cytokine production               | 1 | 8 | 20/3649  | 4.31e-02 | 4.31e-02 | 1.32e-01 | 1 | <i>ZFP36</i>               | 0 | 0       | 1/8 | 0/8 | 1/8 |
| GO:1903555 | regulation of tumor necrosis factor superfamily cytokine production | 1 | 8 | 20/3649  | 4.31e-02 | 4.31e-02 | 1.32e-01 | 1 | <i>ZFP36</i>               | 0 | 0       | 1/8 | 0/8 | 1/8 |
| GO:0035194 | post-transcriptional gene silencing by RNA                          | 1 | 8 | 21/3649  | 4.52e-02 | 4.52e-02 | 1.32e-01 | 1 | <i>ZFP36</i>               | 0 | 0       | 1/8 | 0/8 | 1/8 |
| GO:0043488 | regulation of mRNA stability                                        | 1 | 8 | 21/3649  | 4.52e-02 | 4.52e-02 | 1.32e-01 | 1 | <i>ZFP36</i>               | 0 | 0       | 1/8 | 0/8 | 1/8 |
| GO:0043524 | negative regulation of neuron apoptotic process                     | 1 | 8 | 21/3649  | 4.52e-02 | 4.52e-02 | 1.32e-01 | 0 | <i>0</i>                   | 1 | RETREG1 | 0/8 | 1/8 | 1/8 |
| GO:0051239 | regulation of multicellular organismal process                      | 3 | 8 | 393/3649 | 4.60e-02 | 4.60e-02 | 1.32e-01 | 3 | <i>MYOD1; RAB7B; ZFP36</i> | 0 | 0       | 3/8 | 0/8 | 3/8 |
| GO:0016441 | post-transcriptional gene silencing                                 | 1 | 8 | 22/3649  | 4.73e-02 | 4.73e-02 | 1.32e-01 | 1 | <i>ZFP36</i>               | 0 | 0       | 1/8 | 0/8 | 1/8 |
| GO:0030218 | erythrocyte differentiation                                         | 1 | 8 | 22/3649  | 4.73e-02 | 4.73e-02 | 1.32e-01 | 1 | <i>ZFP36</i>               | 0 | 0       | 1/8 | 0/8 | 1/8 |
| GO:0062207 | regulation of pattern recognition receptor signaling pathway        | 1 | 8 | 22/3649  | 4.73e-02 | 4.73e-02 | 1.32e-01 | 1 | <i>RAB7B</i>               | 0 | 0       | 1/8 | 0/8 | 1/8 |
| GO:0034101 | erythrocyte homeostasis                                             | 1 | 8 | 23/3649  | 4.94e-02 | 4.94e-02 | 1.32e-01 | 1 | <i>ZFP36</i>               | 0 | 0       | 1/8 | 0/8 | 1/8 |

---

## 2. Enriched Biological Process of Gene Ontology terms to DEG prospect in EW vs CW into time 2

| ID         | Description                                     | count | terms | BgRatio  | pvalue   | p.adjust | qvalue   | Count.UpReg | geneID.UpReg                                                             | Count.DownReg | geneID.DownReg                                              | GeneRatio.Up | GeneRatio.Down | GeneRatio |
|------------|-------------------------------------------------|-------|-------|----------|----------|----------|----------|-------------|--------------------------------------------------------------------------|---------------|-------------------------------------------------------------|--------------|----------------|-----------|
| GO:0032787 | monocarboxylic acid metabolic process           | 12    | 42    | 142/3649 | 3.08e-08 | 3.08e-08 | 2.71e-05 | 7           | ACACA;<br>ADIPOQ;<br>FABP4; FASN;<br>INSIG1;<br>NR1D1; SCD               | 5             | CPT1B; FADS3;<br>HPGD; PFKFB2;<br>PRL                       | 7/42         | 5/42           | 12/42     |
| GO:0006631 | fatty acid metabolic process                    | 10    | 42    | 95/3649  | 6.56e-08 | 6.56e-08 | 2.89e-05 | 6           | ACACA;<br>ADIPOQ;<br>FABP4; FASN;<br>INSIG1; SCD                         | 4             | CPT1B; FADS3;<br>HPGD; PRL                                  | 6/42         | 4/42           | 10/42     |
| GO:0072330 | monocarboxylic acid biosynthetic process        | 7     | 42    | 55/3649  | 2.15e-06 | 2.15e-06 | 6.29e-04 | 5           | ACACA; FASN;<br>INSIG1;<br>NR1D1; SCD                                    | 2             | FADS3; PRL                                                  | 5/42         | 2/42           | 7/42      |
| GO:0019752 | carboxylic acid metabolic process               | 12    | 42    | 232/3649 | 6.58e-06 | 6.58e-06 | 9.05e-04 | 7           | ACACA;<br>ADIPOQ;<br>FABP4; FASN;<br>INSIG1;<br>NR1D1; SCD               | 5             | CPT1B; FADS3;<br>HPGD; PFKFB2;<br>PRL                       | 7/42         | 5/42           | 12/42     |
| GO:0043436 | oxoacid metabolic process                       | 12    | 42    | 232/3649 | 6.58e-06 | 6.58e-06 | 9.05e-04 | 7           | ACACA;<br>ADIPOQ;<br>FABP4; FASN;<br>INSIG1;<br>NR1D1; SCD               | 5             | CPT1B; FADS3;<br>HPGD; PFKFB2;<br>PRL                       | 7/42         | 5/42           | 12/42     |
| GO:0044255 | cellular lipid metabolic process                | 12    | 42    | 233/3649 | 6.89e-06 | 6.89e-06 | 9.05e-04 | 8           | ACACA;<br>ADIPOQ;<br>FABP4; FASN;<br>INSIG1; LDLR;<br>LSS; SCD           | 4             | CPT1B; FADS3;<br>HPGD; PRL                                  | 8/42         | 4/42           | 12/42     |
| GO:0006082 | organic acid metabolic process                  | 12    | 42    | 234/3649 | 7.20e-06 | 7.20e-06 | 9.05e-04 | 7           | ACACA;<br>ADIPOQ;<br>FABP4; FASN;<br>INSIG1;<br>NR1D1; SCD               | 5             | CPT1B; FADS3;<br>HPGD; PFKFB2;<br>PRL                       | 7/42         | 5/42           | 12/42     |
| GO:0006633 | fatty acid biosynthetic process                 | 6     | 42    | 48/3649  | 1.38e-05 | 1.38e-05 | 1.52e-03 | 4           | ACACA; FASN;<br>INSIG1; SCD                                              | 2             | FADS3; PRL                                                  | 4/42         | 2/42           | 6/42      |
| GO:0044281 | small molecule metabolic process                | 16    | 42    | 458/3649 | 2.14e-05 | 2.14e-05 | 2.10e-03 | 9           | ACACA;<br>ADIPOQ;<br>FABP4; FASN;<br>INSIG1; LDLR;<br>LSS; NR1D1;<br>SCD | 7             | CPT1B;<br>DMAC2L;<br>FADS3; HPGD;<br>PFKFB1;<br>PFKFB2; PRL | 9/42         | 7/42           | 16/42     |
| GO:0042632 | cholesterol homeostasis                         | 4     | 42    | 17/3649  | 3.24e-05 | 3.24e-05 | 2.55e-03 | 4           | FABP4;<br>INSIG1; LDLR;<br>NR1D1                                         | 0             | 0                                                           | 4/42         | 0/42           | 4/42      |
| GO:0055092 | sterol homeostasis                              | 4     | 42    | 17/3649  | 3.24e-05 | 3.24e-05 | 2.55e-03 | 4           | FABP4;<br>INSIG1; LDLR;<br>NR1D1                                         | 0             | 0                                                           | 4/42         | 0/42           | 4/42      |
| GO:0044283 | small molecule biosynthetic process             | 9     | 42    | 149/3649 | 3.48e-05 | 3.48e-05 | 2.55e-03 | 7           | ACACA;<br>ADIPOQ;<br>FASN; INSIG1;<br>LSS; NR1D1;<br>SCD                 | 2             | FADS3; PRL                                                  | 7/42         | 2/42           | 9/42      |
| GO:0006629 | lipid metabolic process                         | 13    | 42    | 325/3649 | 4.12e-05 | 4.12e-05 | 2.74e-03 | 9           | ACACA;<br>ADIPOQ;<br>FABP4; FASN;<br>INSIG1; LDLR;<br>LSS; NR1D1;<br>SCD | 4             | CPT1B; FADS3;<br>HPGD; PRL                                  | 9/42         | 4/42           | 13/42     |
| GO:0046394 | carboxylic acid biosynthetic process            | 7     | 42    | 86/3649  | 4.37e-05 | 4.37e-05 | 2.74e-03 | 5           | ACACA; FASN;<br>INSIG1;<br>NR1D1; SCD                                    | 2             | FADS3; PRL                                                  | 5/42         | 2/42           | 7/42      |
| GO:0016053 | organic acid biosynthetic process               | 7     | 42    | 87/3649  | 4.71e-05 | 4.71e-05 | 2.76e-03 | 5           | ACACA; FASN;<br>INSIG1;<br>NR1D1; SCD                                    | 2             | FADS3; PRL                                                  | 5/42         | 2/42           | 7/42      |
| GO:0008610 | lipid biosynthetic process                      | 9     | 42    | 156/3649 | 5.02e-05 | 5.02e-05 | 2.76e-03 | 7           | ACACA; FASN;<br>INSIG1; LDLR;<br>LSS; NR1D1;<br>SCD                      | 2             | FADS3; PRL                                                  | 7/42         | 2/42           | 9/42      |
| GO:0010565 | regulation of cellular ketone metabolic process | 4     | 42    | 23/3649  | 1.15e-04 | 1.15e-04 | 5.93e-03 | 3           | ADIPOQ;<br>INSIG1;<br>NR1D1                                              | 1             | PRL                                                         | 3/42         | 1/42           | 4/42      |
| GO:0050873 | brown fat cell differentiation                  | 3     | 42    | 10/3649  | 1.61e-04 | 1.61e-04 | 7.87e-03 | 2           | ADIPOQ;<br>FABP4                                                         | 1             | ADRB2                                                       | 2/42         | 1/42           | 3/42      |
| GO:0045444 | fat cell differentiation                        | 5     | 42    | 48/3649  | 1.88e-04 | 1.88e-04 | 8.71e-03 | 4           | ADIPOQ;<br>FABP4;<br>INSIG1;<br>NR1D1                                    | 1             | ADRB2                                                       | 4/42         | 1/42           | 5/42      |
| GO:0055088 | lipid homeostasis                               | 4     | 42    | 29/3649  | 2.92e-04 | 2.92e-04 | 1.29e-02 | 4           | FABP4;<br>INSIG1; LDLR;<br>NR1D1                                         | 0             | 0                                                           | 4/42         | 0/42           | 4/42      |
| GO:0045834 | positive regulation of lipid metabolic process  | 4     | 42    | 30/3649  | 3.35e-04 | 3.35e-04 | 1.40e-02 | 3           | ADIPOQ;<br>LDLR; NR1D1                                                   | 1             | PRL                                                         | 3/42         | 1/42           | 4/42      |
| GO:0062012 | regulation of small molecule metabolic process  | 5     | 42    | 58/3649  | 4.62e-04 | 4.62e-04 | 1.85e-02 | 4           | ADIPOQ;<br>INSIG1; LDLR;<br>NR1D1                                        | 1             | PRL                                                         | 4/42         | 1/42           | 5/42      |

|            |                                                         |    |    |          |          |          |          |   |                                           |   |                                                |      |      |       |
|------------|---------------------------------------------------------|----|----|----------|----------|----------|----------|---|-------------------------------------------|---|------------------------------------------------|------|------|-------|
| GO:0046890 | regulation of lipid biosynthetic process                | 4  | 42 | 34/3649  | 5.48e-04 | 5.48e-04 | 2.10e-02 | 3 | <i>INSIG1; LDLR; NR1D1</i>                | 1 | <i>PRL</i>                                     | 3/42 | 1/42 | 4/42  |
| GO:0019217 | regulation of fatty acid metabolic process              | 3  | 42 | 17/3649  | 8.62e-04 | 8.62e-04 | 3.16e-02 | 2 | <i>ADIPOQ; INSIG1</i>                     | 1 | <i>PRL</i>                                     | 2/42 | 1/42 | 3/42  |
| GO:2000026 | regulation of multicellular organismal development      | 8  | 42 | 182/3649 | 8.99e-04 | 8.99e-04 | 3.16e-02 | 4 | <i>ADIPOQ; LDLR; NR1D1; PRKCA</i>         | 4 | <i>ADRB2; ANGPT2; GJA1; PRL</i>                | 4/42 | 4/42 | 8/42  |
| GO:0019218 | regulation of steroid metabolic process                 | 3  | 42 | 18/3649  | 1.03e-03 | 1.03e-03 | 3.34e-02 | 3 | <i>INSIG1; LDLR; NR1D1</i>                | 0 | <i>0</i>                                       | 3/42 | 0/42 | 3/42  |
| GO:0046889 | positive regulation of lipid biosynthetic process       | 3  | 42 | 18/3649  | 1.03e-03 | 1.03e-03 | 3.34e-02 | 2 | <i>LDLR; NR1D1</i>                        | 1 | <i>PRL</i>                                     | 2/42 | 1/42 | 3/42  |
| GO:0060348 | bone development                                        | 4  | 42 | 41/3649  | 1.13e-03 | 1.13e-03 | 3.55e-02 | 1 | <i>INSIG1</i>                             | 3 | <i>GJA1; SERPINH1; TRIM45</i>                  | 1/42 | 3/42 | 4/42  |
| GO:0019216 | regulation of lipid metabolic process                   | 5  | 42 | 72/3649  | 1.25e-03 | 1.25e-03 | 3.80e-02 | 4 | <i>ADIPOQ; INSIG1; LDLR; NR1D1</i>        | 1 | <i>PRL</i>                                     | 4/42 | 1/42 | 5/42  |
| GO:0050728 | negative regulation of inflammatory response            | 3  | 42 | 20/3649  | 1.41e-03 | 1.41e-03 | 4.01e-02 | 3 | <i>ADIPOQ; LDLR; NR1D1</i>                | 0 | <i>0</i>                                       | 3/42 | 0/42 | 3/42  |
| GO:0062013 | positive regulation of small molecule metabolic process | 3  | 42 | 20/3649  | 1.41e-03 | 1.41e-03 | 4.01e-02 | 2 | <i>ADIPOQ; NR1D1</i>                      | 1 | <i>PRL</i>                                     | 2/42 | 1/42 | 3/42  |
| GO:0042180 | cellular ketone metabolic process                       | 4  | 42 | 46/3649  | 1.74e-03 | 1.74e-03 | 4.76e-02 | 3 | <i>ADIPOQ; INSIG1; NR1D1</i>              | 1 | <i>PRL</i>                                     | 3/42 | 1/42 | 4/42  |
| GO:0051093 | negative regulation of developmental process            | 6  | 42 | 115/3649 | 1.78e-03 | 1.78e-03 | 4.76e-02 | 4 | <i>ADIPOQ; INSIG1; LDLR; NR1D1</i>        | 2 | <i>ADRB2; ANGPT2</i>                           | 4/42 | 2/42 | 6/42  |
| GO:2000241 | regulation of reproductive process                      | 3  | 42 | 23/3649  | 2.14e-03 | 2.14e-03 | 5.54e-02 | 1 | <i>RNASE10</i>                            | 2 | <i>GJA1; PRL</i>                               | 1/42 | 2/42 | 3/42  |
| GO:0001659 | temperature homeostasis                                 | 3  | 42 | 26/3649  | 3.07e-03 | 3.07e-03 | 7.71e-02 | 1 | <i>NR1D1</i>                              | 2 | <i>ADRB2; GJA1</i>                             | 1/42 | 2/42 | 3/42  |
| GO:0032102 | negative regulation of response to external stimulus    | 4  | 42 | 54/3649  | 3.16e-03 | 3.16e-03 | 7.73e-02 | 3 | <i>ADIPOQ; LDLR; NR1D1</i>                | 1 | <i>ANGPT2</i>                                  | 3/42 | 1/42 | 4/42  |
| GO:0015833 | peptide transport                                       | 3  | 42 | 27/3649  | 3.42e-03 | 3.42e-03 | 7.93e-02 | 1 | <i>NR1D1</i>                              | 2 | <i>GJA1; PRL</i>                               | 1/42 | 2/42 | 3/42  |
| GO:0046879 | hormone secretion                                       | 3  | 42 | 27/3649  | 3.42e-03 | 3.42e-03 | 7.93e-02 | 1 | <i>NR1D1</i>                              | 2 | <i>GJA1; PRL</i>                               | 1/42 | 2/42 | 3/42  |
| GO:0009653 | anatomical structure morphogenesis                      | 11 | 42 | 390/3649 | 3.60e-03 | 3.60e-03 | 8.11e-02 | 5 | <i>ADIPOQ; ALCAM; INSIG1; LDLR; PRKCA</i> | 6 | <i>ANGPT2; FHL2; GJA1; HPGD; PRL; SERPINH1</i> | 5/42 | 6/42 | 11/42 |
| GO:0009914 | hormone transport                                       | 3  | 42 | 28/3649  | 3.80e-03 | 3.80e-03 | 8.25e-02 | 1 | <i>NR1D1</i>                              | 2 | <i>GJA1; PRL</i>                               | 1/42 | 2/42 | 3/42  |
| GO:0008202 | steroid metabolic process                               | 4  | 42 | 57/3649  | 3.85e-03 | 3.85e-03 | 8.25e-02 | 4 | <i>INSIG1; LDLR; LSS; NR1D1</i>           | 0 | <i>0</i>                                       | 4/42 | 0/42 | 4/42  |
| GO:1901700 | response to oxygen-containing compound                  | 8  | 42 | 230/3649 | 4.01e-03 | 4.01e-03 | 8.25e-02 | 5 | <i>ADIPOQ; LDLR; NR1D1; PRKCA; SCD</i>    | 3 | <i>ADRB2; GJA1; PRL</i>                        | 5/42 | 3/42 | 8/42  |
| GO:0050793 | regulation of developmental process                     | 10 | 42 | 338/3649 | 4.03e-03 | 4.03e-03 | 8.25e-02 | 5 | <i>ADIPOQ; INSIG1; LDLR; NR1D1; PRKCA</i> | 5 | <i>ADRB2; ANGPT2; GJA1; MAMSTR; PRL</i>        | 5/42 | 5/42 | 10/42 |
| GO:0033559 | unsaturated fatty acid metabolic process                | 3  | 42 | 29/3649  | 4.21e-03 | 4.21e-03 | 8.42e-02 | 1 | <i>SCD</i>                                | 2 | <i>FADS3; HPGD</i>                             | 1/42 | 2/42 | 3/42  |
| GO:0051241 | negative regulation of multicellular organismal process | 6  | 42 | 138/3649 | 4.48e-03 | 4.48e-03 | 8.63e-02 | 3 | <i>ADIPOQ; LDLR; NR1D1</i>                | 3 | <i>ADRB2; ANGPT2; GJA1</i>                     | 3/42 | 3/42 | 6/42  |
| GO:0050727 | regulation of inflammatory response                     | 4  | 42 | 60/3649  | 4.64e-03 | 4.64e-03 | 8.63e-02 | 4 | <i>ADIPOQ; FABP4; LDLR; NR1D1</i>         | 0 | <i>0</i>                                       | 4/42 | 0/42 | 4/42  |
| GO:0006694 | steroid biosynthetic process                            | 3  | 42 | 30/3649  | 4.64e-03 | 4.64e-03 | 8.63e-02 | 3 | <i>INSIG1; LSS; NR1D1</i>                 | 0 | <i>0</i>                                       | 3/42 | 0/42 | 3/42  |
| GO:0045598 | regulation of fat cell differentiation                  | 3  | 42 | 31/3649  | 5.10e-03 | 5.10e-03 | 8.63e-02 | 3 | <i>ADIPOQ; INSIG1; NR1D1</i>              | 0 | <i>0</i>                                       | 3/42 | 0/42 | 3/42  |
| GO:0010629 | negative regulation of gene expression                  | 6  | 42 | 143/3649 | 5.33e-03 | 5.33e-03 | 8.63e-02 | 3 | <i>ADIPOQ; FABP4; LDLR</i>                | 3 | <i>EIF4EBP1; GJA1; PRL</i>                     | 3/42 | 3/42 | 6/42  |
| GO:0034381 | plasma lipoprotein particle clearance                   | 2  | 42 | 10/3649  | 5.49e-03 | 5.49e-03 | 8.63e-02 | 2 | <i>ADIPOQ; LDLR</i>                       | 0 | <i>0</i>                                       | 2/42 | 0/42 | 2/42  |
| GO:0042116 | macrophage activation                                   | 2  | 42 | 10/3649  | 5.49e-03 | 5.49e-03 | 8.63e-02 | 2 | <i>LDLR; NR1D1</i>                        | 0 | <i>0</i>                                       | 2/42 | 0/42 | 2/42  |
| GO:0045599 | negative regulation of fat cell differentiation         | 2  | 42 | 10/3649  | 5.49e-03 | 5.49e-03 | 8.63e-02 | 2 | <i>ADIPOQ; INSIG1</i>                     | 0 | <i>0</i>                                       | 2/42 | 0/42 | 2/42  |
| GO:0060079 | excitatory postsynaptic potential                       | 2  | 42 | 10/3649  | 5.49e-03 | 5.49e-03 | 8.63e-02 | 1 | <i>CHRNA3</i>                             | 1 | <i>ADRB2</i>                                   | 1/42 | 1/42 | 2/42  |

|            |                                                        |    |    |          |          |          |          |   |                                           |   |                                            |      |      |       |
|------------|--------------------------------------------------------|----|----|----------|----------|----------|----------|---|-------------------------------------------|---|--------------------------------------------|------|------|-------|
| GO:0060840 | artery development                                     | 2  | 42 | 10/3649  | 5.49e-03 | 5.49e-03 | 8.63e-02 | 1 | <i>LDLR</i>                               | 1 | <i>HPGD</i>                                | 1/42 | 1/42 | 2/42  |
| GO:0120162 | positive regulation of cold-induced thermogenesis      | 2  | 42 | 10/3649  | 5.49e-03 | 5.49e-03 | 8.63e-02 | 0 | <i>0</i>                                  | 2 | <i>ADRB2; GJA1</i>                         | 0/42 | 2/42 | 2/42  |
| GO:0150076 | neuroinflammatory response                             | 2  | 42 | 10/3649  | 5.49e-03 | 5.49e-03 | 8.63e-02 | 2 | <i>LDLR; NR1D1</i>                        | 0 | <i>0</i>                                   | 2/42 | 0/42 | 2/42  |
| GO:0044262 | cellular carbohydrate metabolic process                | 4  | 42 | 64/3649  | 5.85e-03 | 5.85e-03 | 9.03e-02 | 2 | <i>ADIPOQ; NR1D1</i>                      | 2 | <i>PFKFB1; PFKFB2</i>                      | 2/42 | 2/42 | 4/42  |
| GO:0042886 | amide transport                                        | 3  | 42 | 34/3649  | 6.62e-03 | 6.62e-03 | 9.61e-02 | 1 | <i>NR1D1</i>                              | 2 | <i>GJA1; PRL</i>                           | 1/42 | 2/42 | 3/42  |
| GO:0042304 | regulation of fatty acid biosynthetic process          | 2  | 42 | 11/3649  | 6.66e-03 | 6.66e-03 | 9.61e-02 | 1 | <i>INSIG1</i>                             | 1 | <i>PRL</i>                                 | 1/42 | 1/42 | 2/42  |
| GO:0060078 | regulation of postsynaptic membrane potential          | 2  | 42 | 11/3649  | 6.66e-03 | 6.66e-03 | 9.61e-02 | 1 | <i>CHRNA3</i>                             | 1 | <i>ADRB2</i>                               | 1/42 | 1/42 | 2/42  |
| GO:0099565 | chemical synaptic transmission, postsynaptic           | 2  | 42 | 11/3649  | 6.66e-03 | 6.66e-03 | 9.61e-02 | 1 | <i>CHRNA3</i>                             | 1 | <i>ADRB2</i>                               | 1/42 | 1/42 | 2/42  |
| GO:0045595 | regulation of cell differentiation                     | 7  | 42 | 199/3649 | 6.82e-03 | 6.82e-03 | 9.68e-02 | 5 | <i>ADIPOQ; INSIG1; LDLR; NR1D1; PRKCA</i> | 2 | <i>GJA1; MAMSTR</i>                        | 5/42 | 2/42 | 7/42  |
| GO:0048468 | cell development                                       | 8  | 42 | 253/3649 | 7.14e-03 | 7.14e-03 | 9.88e-02 | 4 | <i>ADIPOQ; ALCAM; LDLR; NR1D1</i>         | 4 | <i>FHL2; GJA1; PRL; SERPINH1</i>           | 4/42 | 4/42 | 8/42  |
| GO:0043122 | regulation of I-kappaB kinase/NF-kappaB signaling      | 3  | 42 | 35/3649  | 7.19e-03 | 7.19e-03 | 9.88e-02 | 2 | <i>ADIPOQ; NR1D1</i>                      | 1 | <i>GJA1</i>                                | 2/42 | 1/42 | 3/42  |
| GO:0090317 | negative regulation of intracellular protein transport | 2  | 42 | 12/3649  | 7.94e-03 | 7.94e-03 | 1.07e-01 | 2 | <i>ADIPOQ; INSIG1</i>                     | 0 | <i>0</i>                                   | 2/42 | 0/42 | 2/42  |
| GO:0032101 | regulation of response to external stimulus            | 6  | 42 | 156/3649 | 8.11e-03 | 8.11e-03 | 1.08e-01 | 5 | <i>ADIPOQ; FABP4; LDLR; NR1D1; PRKCA</i>  | 1 | <i>ANGPT2</i>                              | 5/42 | 1/42 | 6/42  |
| GO:0031348 | negative regulation of defense response                | 3  | 42 | 37/3649  | 8.40e-03 | 8.40e-03 | 1.09e-01 | 3 | <i>ADIPOQ; LDLR; NR1D1</i>                | 0 | <i>0</i>                                   | 3/42 | 0/42 | 3/42  |
| GO:0009719 | response to endogenous stimulus                        | 7  | 42 | 207/3649 | 8.42e-03 | 8.42e-03 | 1.09e-01 | 3 | <i>ADIPOQ; LDLR; NR1D1</i>                | 4 | <i>ADRB2; FHL2; GJA1; HPGD</i>             | 3/42 | 4/42 | 7/42  |
| GO:0048514 | blood vessel morphogenesis                             | 5  | 42 | 112/3649 | 8.56e-03 | 8.56e-03 | 1.09e-01 | 2 | <i>LDLR; PRKCA</i>                        | 3 | <i>ANGPT2; GJA1; HPGD</i>                  | 2/42 | 3/42 | 5/42  |
| GO:0048708 | astrocyte differentiation                              | 2  | 42 | 13/3649  | 9.31e-03 | 9.31e-03 | 1.16e-01 | 2 | <i>LDLR; NR1D1</i>                        | 0 | <i>0</i>                                   | 2/42 | 0/42 | 2/42  |
| GO:0010033 | response to organic substance                          | 11 | 42 | 442/3649 | 9.34e-03 | 9.34e-03 | 1.16e-01 | 5 | <i>ADIPOQ; LDLR; NR1D1; PRKCA; SCD</i>    | 6 | <i>ACKR4; ADRB2; FHL2; GJA1; HPGD; PRL</i> | 5/42 | 6/42 | 11/42 |
| GO:0007267 | cell-cell signaling                                    | 6  | 42 | 162/3649 | 9.70e-03 | 9.70e-03 | 1.19e-01 | 3 | <i>ADIPOQ; CHRNA3; NR1D1</i>              | 3 | <i>ADRB2; GJA1; PRL</i>                    | 3/42 | 3/42 | 6/42  |
| GO:0030500 | regulation of bone mineralization                      | 2  | 42 | 14/3649  | 1.08e-02 | 1.08e-02 | 1.28e-01 | 0 | <i>0</i>                                  | 2 | <i>ADRB2; GJA1</i>                         | 0/42 | 2/42 | 2/42  |
| GO:0097006 | regulation of plasma lipoprotein particle levels       | 2  | 42 | 14/3649  | 1.08e-02 | 1.08e-02 | 1.28e-01 | 2 | <i>ADIPOQ; LDLR</i>                       | 0 | <i>0</i>                                   | 2/42 | 0/42 | 2/42  |
| GO:0023057 | negative regulation of signaling                       | 7  | 42 | 219/3649 | 1.13e-02 | 1.13e-02 | 1.33e-01 | 3 | <i>ADIPOQ; LDLR; NR1D1</i>                | 4 | <i>ADRB2; FHL2; GJA1; PRL</i>              | 3/42 | 4/42 | 7/42  |
| GO:0001501 | skeletal system development                            | 4  | 42 | 79/3649  | 1.22e-02 | 1.22e-02 | 1.36e-01 | 1 | <i>INSIG1</i>                             | 3 | <i>GJA1; SERPINH1; TRIM45</i>              | 1/42 | 3/42 | 4/42  |
| GO:0002695 | negative regulation of leukocyte activation            | 2  | 42 | 15/3649  | 1.24e-02 | 1.24e-02 | 1.36e-01 | 2 | <i>LDLR; NR1D1</i>                        | 0 | <i>0</i>                                   | 2/42 | 0/42 | 2/42  |
| GO:0070167 | regulation of biomineral tissue development            | 2  | 42 | 15/3649  | 1.24e-02 | 1.24e-02 | 1.36e-01 | 0 | <i>0</i>                                  | 2 | <i>ADRB2; GJA1</i>                         | 0/42 | 2/42 | 2/42  |
| GO:0110149 | regulation of biomineralization                        | 2  | 42 | 15/3649  | 1.24e-02 | 1.24e-02 | 1.36e-01 | 0 | <i>0</i>                                  | 2 | <i>ADRB2; GJA1</i>                         | 0/42 | 2/42 | 2/42  |
| GO:0044057 | regulation of system process                           | 4  | 42 | 81/3649  | 1.33e-02 | 1.33e-02 | 1.36e-01 | 2 | <i>ADIPOQ; PRKCA</i>                      | 2 | <i>ADRB2; GJA1</i>                         | 2/42 | 2/42 | 4/42  |
| GO:0051094 | positive regulation of developmental process           | 6  | 42 | 174/3649 | 1.35e-02 | 1.35e-02 | 1.36e-01 | 2 | <i>ADIPOQ; PRKCA</i>                      | 4 | <i>ADRB2; GJA1; MAMSTR; PRL</i>            | 2/42 | 4/42 | 6/42  |
| GO:0023061 | signal release                                         | 3  | 42 | 44/3649  | 1.35e-02 | 1.35e-02 | 1.36e-01 | 1 | <i>NR1D1</i>                              | 2 | <i>GJA1; PRL</i>                           | 1/42 | 2/42 | 3/42  |
| GO:0007589 | body fluid secretion                                   | 2  | 42 | 16/3649  | 1.40e-02 | 1.40e-02 | 1.36e-01 | 0 | <i>0</i>                                  | 2 | <i>GJA1; PRL</i>                           | 0/42 | 2/42 | 2/42  |
| GO:0032387 | negative regulation of intracellular transport         | 2  | 42 | 16/3649  | 1.40e-02 | 1.40e-02 | 1.36e-01 | 2 | <i>ADIPOQ; INSIG1</i>                     | 0 | <i>0</i>                                   | 2/42 | 0/42 | 2/42  |
| GO:0048659 | smooth muscle cell proliferation                       | 2  | 42 | 16/3649  | 1.40e-02 | 1.40e-02 | 1.36e-01 | 1 | <i>ADIPOQ</i>                             | 1 | <i>GJA1</i>                                | 1/42 | 1/42 | 2/42  |

|            |                                                      |    |    |          |          |          |          |   |                                          |   |                                   |      |      |       |
|------------|------------------------------------------------------|----|----|----------|----------|----------|----------|---|------------------------------------------|---|-----------------------------------|------|------|-------|
| GO:0048660 | regulation of smooth muscle cell proliferation       | 2  | 42 | 16/3649  | 1.40e-02 | 1.40e-02 | 1.36e-01 | 1 | ADIPOQ                                   | 1 | GJA1                              | 1/42 | 1/42 | 2/42  |
| GO:0050768 | negative regulation of neurogenesis                  | 2  | 42 | 16/3649  | 1.40e-02 | 1.40e-02 | 1.36e-01 | 2 | LDLR; NR1D1                              | 0 | 0                                 | 2/42 | 0/42 | 2/42  |
| GO:0051961 | negative regulation of nervous system development    | 2  | 42 | 16/3649  | 1.40e-02 | 1.40e-02 | 1.36e-01 | 2 | LDLR; NR1D1                              | 0 | 0                                 | 2/42 | 0/42 | 2/42  |
| GO:1901701 | cellular response to oxygen-containing compound      | 6  | 42 | 176/3649 | 1.43e-02 | 1.43e-02 | 1.36e-01 | 4 | ADIPOQ; LDLR; NR1D1; PRKCA               | 2 | ADRB2; GJA1                       | 4/42 | 2/42 | 6/42  |
| GO:0009896 | positive regulation of catabolic process             | 4  | 42 | 84/3649  | 1.50e-02 | 1.50e-02 | 1.36e-01 | 1 | LDLR                                     | 3 | ADRB2; ATG101; GJA1               | 1/42 | 3/42 | 4/42  |
| GO:0007249 | I-kappaB kinase/NF-kappaB signaling                  | 3  | 42 | 46/3649  | 1.53e-02 | 1.53e-02 | 1.36e-01 | 2 | ADIPOQ; NR1D1                            | 1 | GJA1                              | 2/42 | 1/42 | 3/42  |
| GO:0030336 | negative regulation of cell migration                | 3  | 42 | 46/3649  | 1.53e-02 | 1.53e-02 | 1.36e-01 | 1 | ADIPOQ                                   | 2 | ANGPT2; GJA1                      | 1/42 | 2/42 | 3/42  |
| GO:0042391 | regulation of membrane potential                     | 3  | 42 | 46/3649  | 1.53e-02 | 1.53e-02 | 1.36e-01 | 1 | CHRNA3                                   | 2 | ADRB2; GJA1                       | 1/42 | 2/42 | 3/42  |
| GO:0045596 | negative regulation of cell differentiation          | 4  | 42 | 85/3649  | 1.57e-02 | 1.57e-02 | 1.36e-01 | 4 | ADIPOQ; INSIG1; LDLR; NR1D1              | 0 | 0                                 | 4/42 | 0/42 | 4/42  |
| GO:0032879 | regulation of localization                           | 10 | 42 | 411/3649 | 1.57e-02 | 1.57e-02 | 1.36e-01 | 5 | ADIPOQ; INSIG1; NR1D1; PRKCA; RNASE10    | 5 | ADRB2; ANGPT2; GJA1; PRL; TSPAN13 | 5/42 | 5/42 | 10/42 |
| GO:0001568 | blood vessel development                             | 5  | 42 | 130/3649 | 1.57e-02 | 1.57e-02 | 1.36e-01 | 2 | LDLR; PRKCA                              | 3 | ANGPT2; GJA1; HPGD                | 2/42 | 3/42 | 5/42  |
| GO:0002761 | regulation of myeloid leukocyte differentiation      | 2  | 42 | 17/3649  | 1.58e-02 | 1.58e-02 | 1.36e-01 | 2 | ADIPOQ; PRKCA                            | 0 | 0                                 | 2/42 | 0/42 | 2/42  |
| GO:0006636 | unsaturated fatty acid biosynthetic process          | 2  | 42 | 17/3649  | 1.58e-02 | 1.58e-02 | 1.36e-01 | 1 | SCD                                      | 1 | FADS3                             | 1/42 | 1/42 | 2/42  |
| GO:0030879 | mammary gland development                            | 2  | 42 | 17/3649  | 1.58e-02 | 1.58e-02 | 1.36e-01 | 0 | 0                                        | 2 | GJA1; PRL                         | 0/42 | 2/42 | 2/42  |
| GO:0046849 | bone remodeling                                      | 2  | 42 | 17/3649  | 1.58e-02 | 1.58e-02 | 1.36e-01 | 0 | 0                                        | 2 | ADRB2; GJA1                       | 0/42 | 2/42 | 2/42  |
| GO:0060349 | bone morphogenesis                                   | 2  | 42 | 17/3649  | 1.58e-02 | 1.58e-02 | 1.36e-01 | 1 | INSIG1                                   | 1 | SERPINH1                          | 1/42 | 1/42 | 2/42  |
| GO:0072359 | circulatory system development                       | 6  | 42 | 180/3649 | 1.58e-02 | 1.58e-02 | 1.36e-01 | 2 | LDLR; PRKCA                              | 4 | ANGPT2; FHL2; GJA1; HPGD          | 2/42 | 4/42 | 6/42  |
| GO:0044242 | cellular lipid catabolic process                     | 3  | 42 | 47/3649  | 1.62e-02 | 1.62e-02 | 1.38e-01 | 2 | ADIPOQ; LDLR                             | 1 | CPT1B                             | 2/42 | 1/42 | 3/42  |
| GO:2000146 | negative regulation of cell motility                 | 3  | 42 | 48/3649  | 1.71e-02 | 1.71e-02 | 1.41e-01 | 1 | ADIPOQ                                   | 2 | ANGPT2; GJA1                      | 1/42 | 2/42 | 3/42  |
| GO:0009605 | response to external stimulus                        | 10 | 42 | 418/3649 | 1.75e-02 | 1.75e-02 | 1.41e-01 | 6 | ADIPOQ; ALCAM; FABP4; LDLR; NR1D1; PRKCA | 4 | ADRB2; ANGPT2; GJA1; PRL          | 6/42 | 4/42 | 10/42 |
| GO:0007565 | female pregnancy                                     | 2  | 42 | 18/3649  | 1.76e-02 | 1.76e-02 | 1.41e-01 | 0 | 0                                        | 2 | GJA1; HPGD                        | 0/42 | 2/42 | 2/42  |
| GO:0032091 | negative regulation of protein binding               | 2  | 42 | 18/3649  | 1.76e-02 | 1.76e-02 | 1.41e-01 | 1 | ADIPOQ                                   | 1 | ADRB2                             | 1/42 | 1/42 | 2/42  |
| GO:0032411 | positive regulation of transporter activity          | 2  | 42 | 18/3649  | 1.76e-02 | 1.76e-02 | 1.41e-01 | 1 | ADIPOQ                                   | 1 | ADRB2                             | 1/42 | 1/42 | 2/42  |
| GO:0044703 | multi-organism reproductive process                  | 2  | 42 | 18/3649  | 1.76e-02 | 1.76e-02 | 1.41e-01 | 0 | 0                                        | 2 | GJA1; HPGD                        | 0/42 | 2/42 | 2/42  |
| GO:0001944 | vasculature development                              | 5  | 42 | 134/3649 | 1.77e-02 | 1.77e-02 | 1.41e-01 | 2 | LDLR; PRKCA                              | 3 | ANGPT2; GJA1; HPGD                | 2/42 | 3/42 | 5/42  |
| GO:0040013 | negative regulation of locomotion                    | 3  | 42 | 49/3649  | 1.81e-02 | 1.81e-02 | 1.41e-01 | 1 | ADIPOQ                                   | 2 | ANGPT2; GJA1                      | 1/42 | 2/42 | 3/42  |
| GO:0051271 | negative regulation of cellular component movement   | 3  | 42 | 49/3649  | 1.81e-02 | 1.81e-02 | 1.41e-01 | 1 | ADIPOQ                                   | 2 | ANGPT2; GJA1                      | 1/42 | 2/42 | 3/42  |
| GO:0031667 | response to nutrient levels                          | 3  | 42 | 50/3649  | 1.91e-02 | 1.91e-02 | 1.41e-01 | 1 | LDLR                                     | 2 | ADRB2; PRL                        | 1/42 | 2/42 | 3/42  |
| GO:1901653 | cellular response to peptide                         | 3  | 42 | 50/3649  | 1.91e-02 | 1.91e-02 | 1.41e-01 | 1 | ADIPOQ                                   | 2 | ADRB2; GJA1                       | 1/42 | 2/42 | 3/42  |
| GO:0031327 | negative regulation of cellular biosynthetic process | 6  | 42 | 188/3649 | 1.92e-02 | 1.92e-02 | 1.41e-01 | 4 | ADIPOQ; FABP4; INSIG1; NR1D1             | 2 | EIF4EBP1; FHL2                    | 4/42 | 2/42 | 6/42  |
| GO:0010243 | response to organonitrogen compound                  | 5  | 42 | 137/3649 | 1.93e-02 | 1.93e-02 | 1.41e-01 | 2 | ADIPOQ; LDLR                             | 3 | ADRB2; GJA1; PRL                  | 2/42 | 3/42 | 5/42  |
| GO:0006635 | fatty acid beta-oxidation                            | 2  | 42 | 19/3649  | 1.95e-02 | 1.95e-02 | 1.41e-01 | 1 | ADIPOQ                                   | 1 | CPT1B                             | 1/42 | 1/42 | 2/42  |
| GO:0044706 | multi-multicellular organism process                 | 2  | 42 | 19/3649  | 1.95e-02 | 1.95e-02 | 1.41e-01 | 0 | 0                                        | 2 | GJA1; HPGD                        | 0/42 | 2/42 | 2/42  |

|            |                                                            |    |    |          |          |          |          |   |                                     |   |                                                         |      |      |       |
|------------|------------------------------------------------------------|----|----|----------|----------|----------|----------|---|-------------------------------------|---|---------------------------------------------------------|------|------|-------|
| GO:0046883 | regulation of hormone secretion                            | 2  | 42 | 19/3649  | 1.95e-02 | 1.95e-02 | 1.41e-01 | 1 | <i>NR1D1</i>                        | 1 | <i>GJA1</i>                                             | 1/42 | 1/42 | 2/42  |
| GO:0050866 | negative regulation of cell activation                     | 2  | 42 | 19/3649  | 1.95e-02 | 1.95e-02 | 1.41e-01 | 2 | <i>LDLR; NR1D1</i>                  | 0 | <i>0</i>                                                | 2/42 | 0/42 | 2/42  |
| GO:0106106 | cold-induced thermogenesis                                 | 2  | 42 | 19/3649  | 1.95e-02 | 1.95e-02 | 1.41e-01 | 0 | <i>0</i>                            | 2 | <i>ADRB2; GJA1</i>                                      | 0/42 | 2/42 | 2/42  |
| GO:0120161 | regulation of cold-induced thermogenesis                   | 2  | 42 | 19/3649  | 1.95e-02 | 1.95e-02 | 1.41e-01 | 0 | <i>0</i>                            | 2 | <i>ADRB2; GJA1</i>                                      | 0/42 | 2/42 | 2/42  |
| GO:0051049 | regulation of transport                                    | 7  | 42 | 246/3649 | 2.05e-02 | 2.05e-02 | 1.46e-01 | 3 | <i>ADIPOQ; INSIG1; NR1D1</i>        | 4 | <i>ADRB2; GJA1; PRL; TSPAN13</i>                        | 3/42 | 4/42 | 7/42  |
| GO:0009746 | response to hexose                                         | 2  | 42 | 20/3649  | 2.16e-02 | 2.16e-02 | 1.46e-01 | 2 | <i>ADIPOQ; NR1D1</i>                | 0 | <i>0</i>                                                | 2/42 | 0/42 | 2/42  |
| GO:0009749 | response to glucose                                        | 2  | 42 | 20/3649  | 2.16e-02 | 2.16e-02 | 1.46e-01 | 2 | <i>ADIPOQ; NR1D1</i>                | 0 | <i>0</i>                                                | 2/42 | 0/42 | 2/42  |
| GO:0030278 | regulation of ossification                                 | 2  | 42 | 20/3649  | 2.16e-02 | 2.16e-02 | 1.46e-01 | 0 | <i>0</i>                            | 2 | <i>ADRB2; GJA1</i>                                      | 0/42 | 2/42 | 2/42  |
| GO:0034284 | response to monosaccharide                                 | 2  | 42 | 20/3649  | 2.16e-02 | 2.16e-02 | 1.46e-01 | 2 | <i>ADIPOQ; NR1D1</i>                | 0 | <i>0</i>                                                | 2/42 | 0/42 | 2/42  |
| GO:0045931 | positive regulation of mitotic cell cycle                  | 2  | 42 | 20/3649  | 2.16e-02 | 2.16e-02 | 1.46e-01 | 1 | <i>PRKCA</i>                        | 1 | <i>EIF4EBP1</i>                                         | 1/42 | 1/42 | 2/42  |
| GO:0062014 | negative regulation of small molecule metabolic process    | 2  | 42 | 20/3649  | 2.16e-02 | 2.16e-02 | 1.46e-01 | 2 | <i>ADIPOQ; INSIG1</i>               | 0 | <i>0</i>                                                | 2/42 | 0/42 | 2/42  |
| GO:0098742 | cell-cell adhesion via plasma-membrane adhesion molecules  | 2  | 42 | 20/3649  | 2.16e-02 | 2.16e-02 | 1.46e-01 | 2 | <i>ADIPOQ; ALCAM</i>                | 0 | <i>0</i>                                                | 2/42 | 0/42 | 2/42  |
| GO:0035239 | tube morphogenesis                                         | 5  | 42 | 143/3649 | 2.28e-02 | 2.28e-02 | 1.53e-01 | 2 | <i>LDLR; PRKCA</i>                  | 3 | <i>ANGPT2; GJA1; HPGD</i>                               | 2/42 | 3/42 | 5/42  |
| GO:0019318 | hexose metabolic process                                   | 3  | 42 | 54/3649  | 2.34e-02 | 2.34e-02 | 1.54e-01 | 1 | <i>ADIPOQ</i>                       | 2 | <i>PFKFB1; PFKFB2</i>                                   | 1/42 | 2/42 | 3/42  |
| GO:0009062 | fatty acid catabolic process                               | 2  | 42 | 21/3649  | 2.37e-02 | 2.37e-02 | 1.54e-01 | 1 | <i>ADIPOQ</i>                       | 1 | <i>CPT1B</i>                                            | 1/42 | 1/42 | 2/42  |
| GO:0009743 | response to carbohydrate                                   | 2  | 42 | 21/3649  | 2.37e-02 | 2.37e-02 | 1.54e-01 | 2 | <i>ADIPOQ; NR1D1</i>                | 0 | <i>0</i>                                                | 2/42 | 0/42 | 2/42  |
| GO:0009890 | negative regulation of biosynthetic process                | 6  | 42 | 197/3649 | 2.37e-02 | 2.37e-02 | 1.54e-01 | 4 | <i>ADIPOQ; FABP4; INSIG1; NR1D1</i> | 2 | <i>EIF4EBP1; FHL2</i>                                   | 4/42 | 2/42 | 6/42  |
| GO:0009991 | response to extracellular stimulus                         | 3  | 42 | 55/3649  | 2.46e-02 | 2.46e-02 | 1.58e-01 | 1 | <i>LDLR</i>                         | 2 | <i>ADRB2; PRL</i>                                       | 1/42 | 2/42 | 3/42  |
| GO:0006897 | endocytosis                                                | 4  | 42 | 98/3649  | 2.51e-02 | 2.51e-02 | 1.58e-01 | 1 | <i>LDLR</i>                         | 3 | <i>ACKR4; ADRB2; PRL</i>                                | 1/42 | 3/42 | 4/42  |
| GO:0007186 | G protein-coupled receptor signaling pathway               | 4  | 42 | 98/3649  | 2.51e-02 | 2.51e-02 | 1.58e-01 | 1 | <i>PRKCA</i>                        | 3 | <i>ACKR4; ADRB2; HPGD</i>                               | 1/42 | 3/42 | 4/42  |
| GO:1902532 | negative regulation of intracellular signal transduction   | 4  | 42 | 98/3649  | 2.51e-02 | 2.51e-02 | 1.58e-01 | 2 | <i>ADIPOQ; NR1D1</i>                | 2 | <i>FHL2; PRL</i>                                        | 2/42 | 2/42 | 4/42  |
| GO:0002683 | negative regulation of immune system process               | 3  | 42 | 56/3649  | 2.58e-02 | 2.58e-02 | 1.58e-01 | 3 | <i>ADIPOQ; LDLR; NR1D1</i>          | 0 | <i>0</i>                                                | 3/42 | 0/42 | 3/42  |
| GO:0006869 | lipid transport                                            | 3  | 42 | 56/3649  | 2.58e-02 | 2.58e-02 | 1.58e-01 | 3 | <i>ADIPOQ; FABP4; LDLR</i>          | 0 | <i>0</i>                                                | 3/42 | 0/42 | 3/42  |
| GO:0008277 | regulation of G protein-coupled receptor signaling pathway | 2  | 42 | 22/3649  | 2.58e-02 | 2.58e-02 | 1.58e-01 | 1 | <i>PRKCA</i>                        | 1 | <i>ADRB2</i>                                            | 1/42 | 1/42 | 2/42  |
| GO:0021782 | glial cell development                                     | 2  | 42 | 22/3649  | 2.58e-02 | 2.58e-02 | 1.58e-01 | 2 | <i>LDLR; NR1D1</i>                  | 0 | <i>0</i>                                                | 2/42 | 0/42 | 2/42  |
| GO:0030072 | peptide hormone secretion                                  | 2  | 42 | 22/3649  | 2.58e-02 | 2.58e-02 | 1.58e-01 | 1 | <i>NR1D1</i>                        | 1 | <i>PRL</i>                                              | 1/42 | 1/42 | 2/42  |
| GO:0048585 | negative regulation of response to stimulus                | 7  | 42 | 259/3649 | 2.64e-02 | 2.64e-02 | 1.58e-01 | 3 | <i>ADIPOQ; LDLR; NR1D1</i>          | 4 | <i>ADRB2; ANGPT2; FHL2; PRL</i>                         | 3/42 | 4/42 | 7/42  |
| GO:0060284 | regulation of cell development                             | 3  | 42 | 57/3649  | 2.70e-02 | 2.70e-02 | 1.58e-01 | 3 | <i>ADIPOQ; LDLR; NR1D1</i>          | 0 | <i>0</i>                                                | 3/42 | 0/42 | 3/42  |
| GO:2000145 | regulation of cell motility                                | 5  | 42 | 150/3649 | 2.74e-02 | 2.74e-02 | 1.58e-01 | 3 | <i>ADIPOQ; PRKCA; RNASE10</i>       | 2 | <i>ANGPT2; GJA1</i>                                     | 3/42 | 2/42 | 5/42  |
| GO:0042127 | regulation of cell population proliferation                | 6  | 42 | 204/3649 | 2.76e-02 | 2.76e-02 | 1.58e-01 | 4 | <i>ADIPOQ; FABP4; NR1D1; PRKCA</i>  | 2 | <i>ATG101; GJA1</i>                                     | 4/42 | 2/42 | 6/42  |
| GO:0048513 | animal organ development                                   | 10 | 42 | 450/3649 | 2.81e-02 | 2.81e-02 | 1.58e-01 | 3 | <i>ADIPOQ; INSIG1; PRKCA</i>        | 7 | <i>ADRB2; ARID5B; FHL2; GJA1; PRL; SERPINH1; TRIM45</i> | 3/42 | 7/42 | 10/42 |
| GO:0002790 | peptide secretion                                          | 2  | 42 | 23/3649  | 2.81e-02 | 2.81e-02 | 1.58e-01 | 1 | <i>NR1D1</i>                        | 1 | <i>PRL</i>                                              | 1/42 | 1/42 | 2/42  |



|            |                                                            |   |    |          |          |          |          |   |                                           |   |                          |      |      |      |
|------------|------------------------------------------------------------|---|----|----------|----------|----------|----------|---|-------------------------------------------|---|--------------------------|------|------|------|
| GO:0003014 | renal system process                                       | 2 | 42 | 23/3649  | 2.81e-02 | 2.81e-02 | 1.58e-01 | 2 | <i>ADIPOQ; CHRNA3</i>                     | 0 | 0                        | 2/42 | 0/42 | 2/42 |
| GO:0006641 | triglyceride metabolic process                             | 2 | 42 | 23/3649  | 2.81e-02 | 2.81e-02 | 1.58e-01 | 2 | <i>INSIG1; LDLR</i>                       | 0 | 0                        | 2/42 | 0/42 | 2/42 |
| GO:1990845 | adaptive thermogenesis                                     | 2 | 42 | 23/3649  | 2.81e-02 | 2.81e-02 | 1.58e-01 | 0 | 0                                         | 2 | <i>ADRB2; GJA1</i>       | 0/42 | 2/42 | 2/42 |
| GO:0005996 | monosaccharide metabolic process                           | 3 | 42 | 58/3649  | 2.82e-02 | 2.82e-02 | 1.58e-01 | 1 | <i>ADIPOQ</i>                             | 2 | <i>PFKFB1; PFKFB2</i>    | 1/42 | 2/42 | 3/42 |
| GO:0007268 | chemical synaptic transmission                             | 3 | 42 | 58/3649  | 2.82e-02 | 2.82e-02 | 1.58e-01 | 2 | <i>ADIPOQ; CHRNA3</i>                     | 1 | <i>ADRB2</i>             | 2/42 | 1/42 | 3/42 |
| GO:0098916 | anterograde trans-synaptic signaling                       | 3 | 42 | 58/3649  | 2.82e-02 | 2.82e-02 | 1.58e-01 | 2 | <i>ADIPOQ; CHRNA3</i>                     | 1 | <i>ADRB2</i>             | 2/42 | 1/42 | 3/42 |
| GO:1901652 | response to peptide                                        | 3 | 42 | 58/3649  | 2.82e-02 | 2.82e-02 | 1.58e-01 | 1 | <i>ADIPOQ</i>                             | 2 | <i>ADRB2; GJA1</i>       | 1/42 | 2/42 | 3/42 |
| GO:0030155 | regulation of cell adhesion                                | 4 | 42 | 102/3649 | 2.86e-02 | 2.86e-02 | 1.58e-01 | 3 | <i>ADIPOQ; PRKCA; RNASE10</i>             | 1 | <i>ANGPT2</i>            | 3/42 | 1/42 | 4/42 |
| GO:0098609 | cell-cell adhesion                                         | 4 | 42 | 102/3649 | 2.86e-02 | 2.86e-02 | 1.58e-01 | 4 | <i>ADIPOQ; ALCAM; PRKCA; RNASE10</i>      | 0 | 0                        | 4/42 | 0/42 | 4/42 |
| GO:0031347 | regulation of defense response                             | 4 | 42 | 103/3649 | 2.95e-02 | 2.95e-02 | 1.60e-01 | 4 | <i>ADIPOQ; FABP4; LDLR; NR1D1</i>         | 0 | 0                        | 4/42 | 0/42 | 4/42 |
| GO:0099537 | trans-synaptic signaling                                   | 3 | 42 | 59/3649  | 2.95e-02 | 2.95e-02 | 1.60e-01 | 2 | <i>ADIPOQ; CHRNA3</i>                     | 1 | <i>ADRB2</i>             | 2/42 | 1/42 | 3/42 |
| GO:0040012 | regulation of locomotion                                   | 5 | 42 | 154/3649 | 3.03e-02 | 3.03e-02 | 1.60e-01 | 3 | <i>ADIPOQ; PRKCA; RNASE10</i>             | 2 | <i>ANGPT2; GJA1</i>      | 3/42 | 2/42 | 5/42 |
| GO:0007292 | female gamete generation                                   | 2 | 42 | 24/3649  | 3.04e-02 | 3.04e-02 | 1.60e-01 | 0 | 0                                         | 2 | <i>HPGD; PRL</i>         | 0/42 | 2/42 | 2/42 |
| GO:0007369 | gastrulation                                               | 2 | 42 | 24/3649  | 3.04e-02 | 3.04e-02 | 1.60e-01 | 1 | <i>ADIPOQ</i>                             | 1 | <i>GJA1</i>              | 1/42 | 1/42 | 2/42 |
| GO:0019395 | fatty acid oxidation                                       | 2 | 42 | 24/3649  | 3.04e-02 | 3.04e-02 | 1.60e-01 | 1 | <i>ADIPOQ</i>                             | 1 | <i>CPT1B</i>             | 1/42 | 1/42 | 2/42 |
| GO:0051100 | negative regulation of binding                             | 2 | 42 | 24/3649  | 3.04e-02 | 3.04e-02 | 1.60e-01 | 1 | <i>ADIPOQ</i>                             | 1 | <i>ADRB2</i>             | 1/42 | 1/42 | 2/42 |
| GO:0072329 | monocarboxylic acid catabolic process                      | 2 | 42 | 24/3649  | 3.04e-02 | 3.04e-02 | 1.60e-01 | 1 | <i>ADIPOQ</i>                             | 1 | <i>CPT1B</i>             | 1/42 | 1/42 | 2/42 |
| GO:0010817 | regulation of hormone levels                               | 3 | 42 | 61/3649  | 3.22e-02 | 3.22e-02 | 1.63e-01 | 1 | <i>NR1D1</i>                              | 2 | <i>GJA1; PRL</i>         | 1/42 | 2/42 | 3/42 |
| GO:0050878 | regulation of body fluid levels                            | 3 | 42 | 61/3649  | 3.22e-02 | 3.22e-02 | 1.63e-01 | 1 | <i>PRKCA</i>                              | 2 | <i>GJA1; PRL</i>         | 1/42 | 2/42 | 3/42 |
| GO:0051270 | regulation of cellular component movement                  | 5 | 42 | 157/3649 | 3.25e-02 | 3.25e-02 | 1.63e-01 | 3 | <i>ADIPOQ; PRKCA; RNASE10</i>             | 2 | <i>ANGPT2; GJA1</i>      | 3/42 | 2/42 | 5/42 |
| GO:0010508 | positive regulation of autophagy                           | 2 | 42 | 25/3649  | 3.28e-02 | 3.28e-02 | 1.63e-01 | 0 | 0                                         | 2 | <i>ADRB2; ATG101</i>     | 0/42 | 2/42 | 2/42 |
| GO:0010721 | negative regulation of cell development                    | 2 | 42 | 25/3649  | 3.28e-02 | 3.28e-02 | 1.63e-01 | 2 | <i>LDLR; NR1D1</i>                        | 0 | 0                        | 2/42 | 0/42 | 2/42 |
| GO:0033002 | muscle cell proliferation                                  | 2 | 42 | 25/3649  | 3.28e-02 | 3.28e-02 | 1.63e-01 | 1 | <i>ADIPOQ</i>                             | 1 | <i>GJA1</i>              | 1/42 | 1/42 | 2/42 |
| GO:0034440 | lipid oxidation                                            | 2 | 42 | 25/3649  | 3.28e-02 | 3.28e-02 | 1.63e-01 | 1 | <i>ADIPOQ</i>                             | 1 | <i>CPT1B</i>             | 1/42 | 1/42 | 2/42 |
| GO:0043123 | positive regulation of I-kappaB kinase/NF-kappaB signaling | 2 | 42 | 25/3649  | 3.28e-02 | 3.28e-02 | 1.63e-01 | 1 | <i>ADIPOQ</i>                             | 1 | <i>GJA1</i>              | 1/42 | 1/42 | 2/42 |
| GO:0046777 | protein autophosphorylation                                | 2 | 42 | 25/3649  | 3.28e-02 | 3.28e-02 | 1.63e-01 | 1 | <i>ADIPOQ</i>                             | 1 | <i>ATG101</i>            | 1/42 | 1/42 | 2/42 |
| GO:0048469 | cell maturation                                            | 2 | 42 | 25/3649  | 3.28e-02 | 3.28e-02 | 1.63e-01 | 0 | 0                                         | 2 | <i>GJA1; PRL</i>         | 0/42 | 2/42 | 2/42 |
| GO:0022407 | regulation of cell-cell adhesion                           | 3 | 42 | 62/3649  | 3.35e-02 | 3.35e-02 | 1.65e-01 | 3 | <i>ADIPOQ; PRKCA; RNASE10</i>             | 0 | 0                        | 3/42 | 0/42 | 3/42 |
| GO:0051051 | negative regulation of transport                           | 3 | 42 | 62/3649  | 3.35e-02 | 3.35e-02 | 1.65e-01 | 2 | <i>ADIPOQ; INSIG1</i>                     | 1 | <i>GJA1</i>              | 2/42 | 1/42 | 3/42 |
| GO:0042592 | homeostatic process                                        | 7 | 42 | 273/3649 | 3.40e-02 | 3.40e-02 | 1.66e-01 | 5 | <i>ADIPOQ; FABP4; INSIG1; LDLR; NR1D1</i> | 2 | <i>ADRB2; GJA1</i>       | 5/42 | 2/42 | 7/42 |
| GO:1901698 | response to nitrogen compound                              | 5 | 42 | 159/3649 | 3.41e-02 | 3.41e-02 | 1.66e-01 | 2 | <i>ADIPOQ; LDLR</i>                       | 3 | <i>ADRB2; GJA1; PRL</i>  | 2/42 | 3/42 | 5/42 |
| GO:0016192 | vesicle-mediated transport                                 | 7 | 42 | 274/3649 | 3.46e-02 | 3.46e-02 | 1.67e-01 | 4 | <i>ADIPOQ; COG7; INSIG1; LDLR</i>         | 3 | <i>ACKR4; ADRB2; PRL</i> | 4/42 | 3/42 | 7/42 |
| GO:0099536 | synaptic signaling                                         | 3 | 42 | 63/3649  | 3.49e-02 | 3.49e-02 | 1.67e-01 | 2 | <i>ADIPOQ; CHRNA3</i>                     | 1 | <i>ADRB2</i>             | 2/42 | 1/42 | 3/42 |
| GO:1902533 | positive regulation of intracellular signal transduction   | 5 | 42 | 160/3649 | 3.49e-02 | 3.49e-02 | 1.67e-01 | 2 | <i>ADIPOQ; PRKCA</i>                      | 3 | <i>ADRB2; GJA1; PRL</i>  | 2/42 | 3/42 | 5/42 |
| GO:0051224 | negative regulation of protein transport                   | 2 | 42 | 26/3649  | 3.53e-02 | 3.53e-02 | 1.68e-01 | 2 | <i>ADIPOQ; INSIG1</i>                     | 0 | 0                        | 2/42 | 0/42 | 2/42 |

|            |                                                              |   |    |          |          |          |          |   |                                   |   |                                                 |      |      |      |
|------------|--------------------------------------------------------------|---|----|----------|----------|----------|----------|---|-----------------------------------|---|-------------------------------------------------|------|------|------|
| GO:0010648 | negative regulation of cell communication                    | 6 | 42 | 218/3649 | 3.66e-02 | 3.66e-02 | 1.73e-01 | 2 | ADIPOQ;<br>NR1D1                  | 4 | ADRB2; FHL2;<br>GJA1; PRL                       | 2/42 | 4/42 | 6/42 |
| GO:0003008 | system process                                               | 6 | 42 | 219/3649 | 3.73e-02 | 3.73e-02 | 1.75e-01 | 4 | ADIPOQ;<br>CHRNA3;<br>LDLR; PRKCA | 2 | ADRB2; GJA1                                     | 4/42 | 2/42 | 6/42 |
| GO:0015748 | organophosphate ester transport                              | 2 | 42 | 27/3649  | 3.79e-02 | 3.79e-02 | 1.75e-01 | 1 | LDLR                              | 1 | GJA1                                            | 1/42 | 1/42 | 2/42 |
| GO:0030282 | bone mineralization                                          | 2 | 42 | 27/3649  | 3.79e-02 | 3.79e-02 | 1.75e-01 | 0 | 0                                 | 2 | ADRB2; GJA1                                     | 0/42 | 2/42 | 2/42 |
| GO:1904950 | negative regulation of establishment of protein localization | 2 | 42 | 27/3649  | 3.79e-02 | 3.79e-02 | 1.75e-01 | 2 | ADIPOQ;<br>INSIG1                 | 0 | 0                                               | 2/42 | 0/42 | 2/42 |
| GO:1902531 | regulation of intracellular signal transduction              | 7 | 42 | 280/3649 | 3.83e-02 | 3.83e-02 | 1.77e-01 | 3 | ADIPOQ;<br>NR1D1;<br>PRKCA        | 4 | ADRB2; FHL2;<br>GJA1; PRL                       | 3/42 | 4/42 | 7/42 |
| GO:0009894 | regulation of catabolic process                              | 5 | 42 | 165/3649 | 3.91e-02 | 3.91e-02 | 1.79e-01 | 1 | LDLR                              | 4 | ADRB2; ATG101;<br>GJA1; HPGD                    | 1/42 | 4/42 | 5/42 |
| GO:0019953 | sexual reproduction                                          | 4 | 42 | 113/3649 | 3.95e-02 | 3.95e-02 | 1.80e-01 | 1 | RNASE10                           | 3 | GJA1; HPGD;<br>PRL                              | 1/42 | 3/42 | 4/42 |
| GO:0048771 | tissue remodeling                                            | 2 | 42 | 28/3649  | 4.05e-02 | 4.05e-02 | 1.82e-01 | 0 | 0                                 | 2 | ADRB2; GJA1                                     | 0/42 | 2/42 | 2/42 |
| GO:0071310 | cellular response to organic substance                       | 8 | 42 | 346/3649 | 4.05e-02 | 4.05e-02 | 1.82e-01 | 4 | ADIPOQ;<br>LDLR; NR1D1;<br>PRKCA  | 4 | ACKR4; ADRB2;<br>GJA1; HPGD                     | 4/42 | 4/42 | 8/42 |
| GO:0007610 | behavior                                                     | 3 | 42 | 67/3649  | 4.08e-02 | 4.08e-02 | 1.82e-01 | 3 | CHRNA3;<br>LDLR; NR1D1            | 0 | 0                                               | 3/42 | 0/42 | 3/42 |
| GO:0048871 | multicellular organismal homeostasis                         | 3 | 42 | 67/3649  | 4.08e-02 | 4.08e-02 | 1.82e-01 | 1 | NR1D1                             | 2 | ADRB2; GJA1                                     | 1/42 | 2/42 | 3/42 |
| GO:0001503 | ossification                                                 | 3 | 42 | 68/3649  | 4.24e-02 | 4.24e-02 | 1.88e-01 | 0 | 0                                 | 3 | ADRB2; FHL2;<br>GJA1                            | 0/42 | 3/42 | 3/42 |
| GO:0001649 | osteoblast differentiation                                   | 2 | 42 | 29/3649  | 4.32e-02 | 4.32e-02 | 1.88e-01 | 0 | 0                                 | 2 | FHL2; GJA1                                      | 0/42 | 2/42 | 2/42 |
| GO:0034764 | positive regulation of transmembrane transport               | 2 | 42 | 29/3649  | 4.32e-02 | 4.32e-02 | 1.88e-01 | 1 | ADIPOQ                            | 1 | ADRB2                                           | 1/42 | 1/42 | 2/42 |
| GO:0050729 | positive regulation of inflammatory response                 | 2 | 42 | 29/3649  | 4.32e-02 | 4.32e-02 | 1.88e-01 | 2 | FABP4; LDLR                       | 0 | 0                                               | 2/42 | 0/42 | 2/42 |
| GO:0071356 | cellular response to tumor necrosis factor                   | 2 | 42 | 29/3649  | 4.32e-02 | 4.32e-02 | 1.88e-01 | 2 | ADIPOQ;<br>NR1D1                  | 0 | 0                                               | 2/42 | 0/42 | 2/42 |
| GO:0035295 | tube development                                             | 5 | 42 | 170/3649 | 4.36e-02 | 4.36e-02 | 1.89e-01 | 2 | LDLR; PRKCA                       | 3 | ANGPT2; GJA1;<br>HPGD                           | 2/42 | 3/42 | 5/42 |
| GO:0045597 | positive regulation of cell differentiation                  | 4 | 42 | 117/3649 | 4.40e-02 | 4.40e-02 | 1.90e-01 | 2 | ADIPOQ;<br>PRKCA                  | 2 | GJA1; MAMSTR                                    | 2/42 | 2/42 | 4/42 |
| GO:0048646 | anatomical structure formation involved in morphogenesis     | 5 | 42 | 172/3649 | 4.55e-02 | 4.55e-02 | 1.94e-01 | 1 | PRKCA                             | 4 | ANGPT2; FHL2;<br>GJA1; PRL                      | 1/42 | 4/42 | 5/42 |
| GO:0016042 | lipid catabolic process                                      | 3 | 42 | 70/3649  | 4.56e-02 | 4.56e-02 | 1.94e-01 | 2 | ADIPOQ;<br>LDLR                   | 1 | CPT1B                                           | 2/42 | 1/42 | 3/42 |
| GO:0008203 | cholesterol metabolic process                                | 2 | 42 | 30/3649  | 4.59e-02 | 4.59e-02 | 1.94e-01 | 2 | LDLR; LSS                         | 0 | 0                                               | 2/42 | 0/42 | 2/42 |
| GO:0048705 | skeletal system morphogenesis                                | 2 | 42 | 30/3649  | 4.59e-02 | 4.59e-02 | 1.94e-01 | 1 | INSIG1                            | 1 | SERPINH1                                        | 1/42 | 1/42 | 2/42 |
| GO:0048598 | embryonic morphogenesis                                      | 3 | 42 | 71/3649  | 4.72e-02 | 4.72e-02 | 1.98e-01 | 2 | ADIPOQ;<br>INSIG1                 | 1 | GJA1                                            | 2/42 | 1/42 | 3/42 |
| GO:0051046 | regulation of secretion                                      | 3 | 42 | 71/3649  | 4.72e-02 | 4.72e-02 | 1.98e-01 | 1 | NR1D1                             | 2 | GJA1; PRL                                       | 1/42 | 2/42 | 3/42 |
| GO:0035556 | intracellular signal transduction                            | 9 | 42 | 423/3649 | 4.75e-02 | 4.75e-02 | 1.98e-01 | 3 | ADIPOQ;<br>NR1D1;<br>PRKCA        | 6 | ADRB2;<br>EIF4EBP1; FHL2;<br>GJA1; PRL;<br>RHOF | 3/42 | 6/42 | 9/42 |
| GO:0006355 | regulation of transcription, DNA-templated                   | 9 | 42 | 425/3649 | 4.87e-02 | 4.87e-02 | 1.99e-01 | 4 | ADIPOQ;<br>CEBPG;<br>FABP4; NR1D1 | 5 | ADRB2; ARID5B;<br>FHL2; MAMSTR;<br>PRL          | 4/42 | 5/42 | 9/42 |
| GO:0002274 | myeloid leukocyte activation                                 | 2 | 42 | 31/3649  | 4.87e-02 | 4.87e-02 | 1.99e-01 | 2 | LDLR; NR1D1                       | 0 | 0                                               | 2/42 | 0/42 | 2/42 |
| GO:0006639 | acylglycerol metabolic process                               | 2 | 42 | 31/3649  | 4.87e-02 | 4.87e-02 | 1.99e-01 | 2 | INSIG1; LDLR                      | 0 | 0                                               | 2/42 | 0/42 | 2/42 |
| GO:0016125 | sterol metabolic process                                     | 2 | 42 | 31/3649  | 4.87e-02 | 4.87e-02 | 1.99e-01 | 2 | LDLR; LSS                         | 0 | 0                                               | 2/42 | 0/42 | 2/42 |
| GO:0050767 | regulation of neurogenesis                                   | 2 | 42 | 31/3649  | 4.87e-02 | 4.87e-02 | 1.99e-01 | 2 | LDLR; NR1D1                       | 0 | 0                                               | 2/42 | 0/42 | 2/42 |
| GO:1903506 | regulation of nucleic acid-templated transcription           | 9 | 42 | 426/3649 | 4.93e-02 | 4.93e-02 | 2.00e-01 | 4 | ADIPOQ;<br>CEBPG;<br>FABP4; NR1D1 | 5 | ADRB2; ARID5B;<br>FHL2; MAMSTR;<br>PRL          | 4/42 | 5/42 | 9/42 |
| GO:0051726 | regulation of cell cycle                                     | 5 | 42 | 176/3649 | 4.95e-02 | 4.95e-02 | 2.00e-01 | 1 | PRKCA                             | 4 | EIF4EBP1;<br>HPGD; KLHL21;<br>PRL               | 1/42 | 4/42 | 5/42 |

### 3. Enriched Biological Process of Gene Ontology terms to DEG prospect in T2 vs T1 into conventional weaning group

| ID         | Description                                        | count | terms | BgRatio  | pvalue   | p.adjust | qvalue   | Count.UpReg | geneID.UpReg                                                                                                                                                                                                                                     | Count.DownReg | geneID.DownReg                                                                                           | GeneRatio.Up | GeneRatio.Down | GeneRatio |
|------------|----------------------------------------------------|-------|-------|----------|----------|----------|----------|-------------|--------------------------------------------------------------------------------------------------------------------------------------------------------------------------------------------------------------------------------------------------|---------------|----------------------------------------------------------------------------------------------------------|--------------|----------------|-----------|
| GO:0009888 | tissue development                                 | 40    | 210   | 276/3649 | 1.75e-08 | 1.75e-08 | 2.88e-05 | 29          | ACTB; ACTG1; ASAH1; CD44; CTSK; EDNRB; FLCN; FRZB; GJA1; GPR4; HEYL; ID3; IGFBP5; ISG15; LFNG; MSTN; MYOD1; MYOG; NPPC; NR4A1; PAK1; PTER; SCIN; SERPINH1; SNAI2; TGFB1; TGFB2; TMEM100; TUFT1                                                   | 11            | ACVR2A; C1GALT1; CITED2; CSRP3; EDN1; EDNRA; FGF1; KCNMA1; MGP; MYO22; RAPGEF2                           | 29/210       | 11/210         | 40/210    |
| GO:0007166 | cell surface receptor signaling pathway            | 45    | 210   | 373/3649 | 5.67e-07 | 5.67e-07 | 4.68e-04 | 30          | ANGPT2; CD14; CD44; CHRNE; CHRNG; EDNRB; FLCN; FRZB; HEYL; IFI6; IGFBP5; INHBB; IRF1; ISG15; LFNG; MSTN; MX1; NFKBIZ; NOS3; NPPC; OAS2; PAK1; RHBDF1; SH2D1A; SNAI2; TGFB1; TGFB2; TMEM100; WFIKN2; ZC3H12A                                      | 15            | ACVR2A; ARL6; CCRL2; CIBAR1; CITED2; CSRP3; CYLD; EDN1; EDNRA; FGF1; HSPB1; NCEH1; RAPGEF2; RNF34; WDR12 | 30/210       | 15/210         | 45/210    |
| GO:0050793 | regulation of developmental process                | 41    | 210   | 338/3649 | 1.76e-06 | 1.76e-06 | 9.68e-04 | 29          | ANGPT2; CD44; CTSK; EDNRB; FLCN; FRZB; GAMT; GJA1; GPR4; HEYL; ID3; IGFBP5; IRF1; ISG15; LRRN1; MAMSTR; MSTN; MYOD1; MYOG; NFKBIZ; OAS2; SCIN; SNAI2; SPRY4; TGFB1; TGFB2; TMEM100; WARS1; ZC3H12A                                               | 12            | ACVR2A; CITED2; EDN1; FGF1; FITM2; GLUL; HSPB1; MGP; NAPEPLD; RAPGEF2; RIOX1; THBS2                      | 29/210       | 12/210         | 41/210    |
| GO:0051239 | regulation of multicellular organismal process     | 45    | 210   | 393/3649 | 2.54e-06 | 2.54e-06 | 9.97e-04 | 32          | ANGPT2; APLN; CD14; CGAS; CTSK; EDNRB; FLCN; FRZB; GAMT; GJA1; GPR4; IGFBP5; INHBB; IRF1; ISG15; ITGB6; LRRN1; MYOD1; MYOG; NFKBIZ; NR4A2; OAS2; ORMDL3; OXTR; SCIN; SNAI2; TGFB1; TGFB2; TMEM100; TNNT2; WARS1; ZC3H12A                         | 13            | ACVR2A; CITED2; CSRP3; EDN1; EDNRA; FGF1; GLUL; HSPB1; KCNMA1; MAP2K6; MGP; RAPGEF2; THBS2               | 32/210       | 13/210         | 45/210    |
| GO:0071310 | cellular response to organic substance             | 41    | 210   | 346/3649 | 3.26e-06 | 3.26e-06 | 9.97e-04 | 31          | ACTB; ACTG1; ASAH1; CD14; CD44; FLCN; GJA1; HEYL; ID3; IGFBP5; INHBB; IRF1; ISG15; MSTN; MX1; MYOD1; MYOG; NR4A1; NR4A2; NSG2; OAS2; PAK1; RBOX2; RXRG; SNAI2; SPRY4; TGFB1; TGFB2; TMEM100; WFIKN2; ZC3H12A                                     | 10            | ACVR2A; CCRL2; CITED2; CSRP3; CYLD; EDN1; EDNRA; FGF1; HSPB1; RAPGEF2                                    | 31/210       | 10/210         | 41/210    |
| GO:0048513 | animal organ development                           | 49    | 210   | 450/3649 | 3.62e-06 | 3.62e-06 | 9.97e-04 | 36          | APLN; ASAH1; CNN2; CTSK; EDNRB; ETV6; FLCN; FRZB; GAMT; GJA1; GNAT1; GPR4; HEYL; ID3; IGFBP5; IRF1; ISG15; LFNG; MSTN; MYOD1; MYOG; NFKBIZ; NPPC; NR4A1; NR4A2; OAS2; SCIN; SERPINH1; SNAI2; SOBP; TGFB1; TGFB2; TMEM100; TRIM45; TUFT1; ZC3H12A | 14            | ACVR2A; C1GALT1; CITED2; CSRP3; ECE2; ECE2; EDN1; EDNRA; FGF1; KCNMA1; MAP2K6; MGP; MYO22; RAPGEF2       | 36/210       | 14/210         | 49/210    |
| GO:0060429 | epithelium development                             | 24    | 210   | 155/3649 | 5.43e-06 | 5.43e-06 | 1.28e-03 | 17          | ACTB; ACTG1; ASAH1; CD44; EDNRB; FRZB; GJA1; GPR4; HEYL; ID3; IGFBP5; LFNG; PAK1; PTER; TGFB1; TGFB2; TMEM100                                                                                                                                    | 7             | C1GALT1; CITED2; EDN1; EDNRA; FGF1; KCNMA1; RAPGEF2                                                      | 17/210       | 7/210          | 24/210    |
| GO:0060537 | muscle tissue development                          | 15    | 210   | 71/3649  | 7.87e-06 | 7.87e-06 | 1.62e-03 | 10          | FLCN; GJA1; HEYL; IGFBP5; MSTN; MYOD1; MYOG; NR4A1; TGFB1; TGFB2                                                                                                                                                                                 | 5             | CITED2; CSRP3; EDN1; EDNRA; MYO22                                                                        | 10/210       | 5/210          | 15/210    |
| GO:2000026 | regulation of multicellular organismal development | 26    | 210   | 182/3649 | 9.89e-06 | 9.89e-06 | 1.81e-03 | 18          | ANGPT2; CTSK; FRZB; GJA1; GPR4; IRF1; ISG15; LRRN1; MYOD1; NFKBIZ; OAS2; SCIN; SNAI2; TGFB1; TGFB2; TMEM100; WARS1; ZC3H12A                                                                                                                      | 8             | ACVR2A; EDN1; FGF1; GLUL; HSPB1; MGP; RAPGEF2; THBS2                                                     | 18/210       | 8/210          | 26/210    |
| GO:0010033 | response to organic substance                      | 47    | 210   | 442/3649 | 1.18e-05 | 1.18e-05 | 1.94e-03 | 34          | ACTB; ACTG1; ASAH1; CD14; CD44; CXCL16; EDNRB; FLCN; GJA1;                                                                                                                                                                                       | 13            | ACVR2A; CCRL2; CITED2;                                                                                   | 34/210       | 13/210         | 47/210    |

|            |                                                                                            |    |     |          |              |              |              |    |                                                                                                                                                                                                                                                                 |                                                                                                                                                                                                   |                                                                                                                            |        |        |        |                                                                                           |
|------------|--------------------------------------------------------------------------------------------|----|-----|----------|--------------|--------------|--------------|----|-----------------------------------------------------------------------------------------------------------------------------------------------------------------------------------------------------------------------------------------------------------------|---------------------------------------------------------------------------------------------------------------------------------------------------------------------------------------------------|----------------------------------------------------------------------------------------------------------------------------|--------|--------|--------|-------------------------------------------------------------------------------------------|
|            |                                                                                            |    |     |          |              |              |              |    |                                                                                                                                                                                                                                                                 | HEYL; ID3; IGFBP5;<br>INHBB; IRF1; ISG15;<br>MSTN; MX1; MYOD1;<br>MYOG; NR4A1; NR4A2;<br>NSG2; OAS2; PAK1;<br>RBFOX2; RGS10; RXRG;<br>SNAI2; SPRY4; TGFB1;<br>TGFB2; TMEM100;<br>WFIKKN2; ZC3H12A |                                                                                                                            |        |        |        | CSRP3; CYLD;<br>EDN1; EDNRA;<br>FGF1; HSPB1;<br>KCNMA1;<br>MAPKAPK3;<br>RAPGEF2;<br>USP13 |
| GO:0007167 | enzyme linked<br>receptor protein<br>signaling<br>pathway                                  | 20 | 210 | 126/3649 | 2.39e-<br>05 | 2.39e-<br>05 | 3.58e-<br>03 | 13 | ANGPT2; FLCN; IFI6;<br>IGFBP5; INHBB; MSTN;<br>NPPC; PAK1; RHBDF1;<br>TGFB1; TGFB2;<br>TMEM100; WFIKKN2                                                                                                                                                         | 7                                                                                                                                                                                                 | ACVR2A;<br>CITED2;<br>CSRP3; FGF1;<br>HSPB1; NCEH1;<br>RAPGEF2                                                             | 13/210 | 7/210  | 20/210 |                                                                                           |
| GO:0009653 | anatomical<br>structure<br>morphogenesis                                                   | 42 | 210 | 390/3649 | 2.83e-<br>05 | 2.83e-<br>05 | 3.89e-<br>03 | 28 | ACTB; ACTG1; ANGPT2;<br>APLN; CD44; FRZB;<br>GAMT; GJA1; GNAT1;<br>GPR4; HEYL; ID3;<br>IGFBP5; LFNG; MYOG;<br>NPPC; NR4A1; NR4A2;<br>PAK1; SERPINH1; SOBP;<br>SPRY4; STXBP1; TGFB1;<br>TGFB2; TMEM100;<br>WARS1; ZC3H12A                                        | 14                                                                                                                                                                                                | C1GALT1;<br>CIBAR1;<br>CITED2;<br>CSRP3; EDN1;<br>EDNRA; FGF1;<br>FITM2; GLUL;<br>HSPB1; MYOZ2;<br>RAPGEF2;<br>RFX2; THBS2 | 28/210 | 14/210 | 42/210 |                                                                                           |
| GO:0001501 | skeletal system<br>development                                                             | 15 | 210 | 79/3649  | 3.07e-<br>05 | 3.07e-<br>05 | 3.90e-<br>03 | 10 | CTSK; FRZB; GJA1;<br>NPPC; SCIN; SERPINH1;<br>SNAI2; TGFB1; TRIM45;<br>WFIKKN2                                                                                                                                                                                  | 5                                                                                                                                                                                                 | CITED2; EDN1;<br>EDNRA;<br>MAP2K6; MGP                                                                                     | 10/210 | 5/210  | 15/210 |                                                                                           |
| GO:0071495 | cellular response<br>to endogenous<br>stimulus                                             | 25 | 210 | 184/3649 | 3.59e-<br>05 | 3.59e-<br>05 | 3.97e-<br>03 | 18 | ACTB; FLCN; GJA1;<br>HEYL; IGFBP5; INHBB;<br>MSTN; NR4A1; NR4A2;<br>NSG2; PAK1; RBFOX2;<br>RXRG; SNAI2; TGFB1;<br>TGFB2; TMEM100;<br>WFIKKN2                                                                                                                    | 7                                                                                                                                                                                                 | ACVR2A;<br>CITED2;<br>CSRP3; EDN1;<br>EDNRA; FGF1;<br>RAPGEF2                                                              | 18/210 | 7/210  | 25/210 |                                                                                           |
| GO:0061061 | muscle structure<br>development                                                            | 18 | 210 | 109/3649 | 3.60e-<br>05 | 3.60e-<br>05 | 3.97e-<br>03 | 13 | ACTG1; EDNRB; GJA1;<br>HEYL; ID3; IGFBP5;<br>MAMSTR; MSTN;<br>MYOD1; MYOG; NR4A1;<br>TGFB1; WFIKKN2                                                                                                                                                             | 5                                                                                                                                                                                                 | CITED2;<br>CSRP3; EDN1;<br>EDNRA; MYOZ2                                                                                    | 13/210 | 5/210  | 18/210 |                                                                                           |
| GO:0044057 | regulation of<br>system process                                                            | 15 | 210 | 81/3649  | 4.18e-<br>05 | 4.18e-<br>05 | 4.32e-<br>03 | 11 | APLN; EDNRB; GJA1;<br>IGFBP5; INHBB; MYOG;<br>ORMDL3; TGFB2;<br>TMEM100; TNNT2;<br>ZC3H12A                                                                                                                                                                      | 4                                                                                                                                                                                                 | CSRP3; EDN1;<br>EDNRA;<br>KCNMA1                                                                                           | 11/210 | 4/210  | 15/210 |                                                                                           |
| GO:0048469 | cell maturation                                                                            | 8  | 210 | 25/3649  | 4.87e-<br>05 | 4.87e-<br>05 | 4.55e-<br>03 | 5  | EDNRB; GJA1; NR4A2;<br>PGRMC1; RND1                                                                                                                                                                                                                             | 3                                                                                                                                                                                                 | EDN1; EDNRA;<br>KCNMA1                                                                                                     | 5/210  | 3/210  | 8/210  |                                                                                           |
| GO:0045595 | regulation of cell<br>differentiation                                                      | 26 | 210 | 199/3649 | 4.96e-<br>05 | 4.96e-<br>05 | 4.55e-<br>03 | 21 | EDNRB; FLCN; FRZB;<br>GJA1; HEYL; ID3;<br>IGFBP5; IRF1; ISG15;<br>MAMSTR; MSTN;<br>MYOD1; MYOG;<br>NFKBIZ; SCIN; SNAI2;<br>SPRY4; TGFB1; TGFB2;<br>TMEM100; ZC3H12A                                                                                             | 5                                                                                                                                                                                                 | ACVR2A; EDN1;<br>NAPEPLD;<br>RAPGEF2;<br>RIOX1                                                                             | 21/210 | 5/210  | 26/210 |                                                                                           |
| GO:0048514 | blood vessel<br>morphogenesis                                                              | 18 | 210 | 112/3649 | 5.24e-<br>05 | 5.24e-<br>05 | 4.56e-<br>03 | 9  | ACTG1; ANGPT2; APLN;<br>GJA1; GPR4; NR4A1;<br>TMEM100; WARS1;<br>ZC3H12A                                                                                                                                                                                        | 9                                                                                                                                                                                                 | C1GALT1;<br>CITED2; EDN1;<br>EDNRA; FGF1;<br>GLUL; HSPB1;<br>RAPGEF2;<br>THBS2                                             | 9/210  | 9/210  | 18/210 |                                                                                           |
| GO:0048762 | mesenchymal<br>cell<br>differentiation                                                     | 10 | 210 | 40/3649  | 5.94e-<br>05 | 5.94e-<br>05 | 4.91e-<br>03 | 7  | EDNRB; FRZB; HEYL;<br>SNAI2; TGFB1; TGFB2;<br>TMEM100                                                                                                                                                                                                           | 3                                                                                                                                                                                                 | CITED2; EDN1;<br>EDNRA                                                                                                     | 7/210  | 3/210  | 10/210 |                                                                                           |
| GO:0045934 | negative<br>regulation of<br>nucleobase-<br>containing<br>compound<br>metabolic<br>process | 24 | 210 | 179/3649 | 6.49e-<br>05 | 6.49e-<br>05 | 5.10e-<br>03 | 16 | BHLHE40; CCND1;<br>CGAS; CXXC5; EDNRB;<br>ETV6; FLCN; FOXP1;<br>HEYL; ID3; IRF1;<br>NR4A2; RBFOX2; SNAI2;<br>TGFB1; ZC3H12A                                                                                                                                     | 8                                                                                                                                                                                                 | CITED2;<br>CRYAB; EDN1;<br>MYOZ2;<br>PRMT6; RIOX1;<br>RNF168;<br>RNF169                                                    | 16/210 | 8/210  | 24/210 |                                                                                           |
| GO:0009605 | response to<br>external stimulus                                                           | 43 | 210 | 418/3649 | 6.88e-<br>05 | 6.88e-<br>05 | 5.16e-<br>03 | 33 | ACTG1; ANGPT2;<br>BHLHE40; C4A; CD14;<br>CD40; CGAS; CNN2;<br>CXCL16; EDNRB; FLCN;<br>GJA1; GNAT1; GPR4;<br>HMGB3; IFI6; INHBB;<br>IRF1; ISG15; MACIR;<br>MSTN; MX1; MX2;<br>MYOD1; NFKBIZ;<br>NR4A1; NR4A2; OAS2;<br>S100A14; SH2D1A;<br>SNAI2; TGFB1; ZC3H12A | 10                                                                                                                                                                                                | ABCC1; CSRP3;<br>CYLD; EDN1;<br>EDNRA; FGF1;<br>HSPB1;<br>KCNMA1;<br>MAPKAPK3;<br>NAPEPLD                                  | 33/210 | 10/210 | 43/210 |                                                                                           |
| GO:0035295 | tube<br>development                                                                        | 23 | 210 | 170/3649 | 8.07e-<br>05 | 8.07e-<br>05 | 5.43e-<br>03 | 14 | ACTG1; ANGPT2; APLN;<br>EDNRB; GJA1; GPR4;<br>HEYL; IGFBP5; NR4A1;<br>PAK1; TGFB2;<br>TMEM100; WARS1;<br>ZC3H12A                                                                                                                                                | 9                                                                                                                                                                                                 | C1GALT1;<br>CITED2; EDN1;<br>EDNRA; FGF1;<br>GLUL; HSPB1;<br>RAPGEF2;<br>THBS2                                             | 14/210 | 9/210  | 23/210 |                                                                                           |
| GO:0045892 | negative<br>regulation of                                                                  | 21 | 210 | 148/3649 | 8.33e-<br>05 | 8.33e-<br>05 | 5.43e-<br>03 | 14 | BHLHE40; CCND1;<br>CXXC5; EDNRB; ETV6;                                                                                                                                                                                                                          | 7                                                                                                                                                                                                 | CITED2;<br>CRYAB; EDN1;                                                                                                    | 14/210 | 7/210  | 21/210 |                                                                                           |

|            |                                                                             |    |     |          |              |              |              |    |  |                                                                                                                                                                                                                   |    |                                                                                                                       |        |        |        |
|------------|-----------------------------------------------------------------------------|----|-----|----------|--------------|--------------|--------------|----|--|-------------------------------------------------------------------------------------------------------------------------------------------------------------------------------------------------------------------|----|-----------------------------------------------------------------------------------------------------------------------|--------|--------|--------|
|            | transcription,<br>DNA-templated                                             |    |     |          |              |              |              |    |  | <i>FLCN; FOXP1; HEYL;<br/>ID3; IRF1; NR4A2;<br/>RBFOX2; SNAI2; TGFB1</i>                                                                                                                                          |    | <i>MYOZ2;<br/>PRMT6; RIOX1;<br/>RNF168</i>                                                                            |        |        |        |
| GO:0071407 | cellular response<br>to organic cyclic<br>compound                          | 15 | 210 | 86/3649  | 8.64e-<br>05 | 8.64e-<br>05 | 5.43e-<br>03 | 14 |  | <i>ACTB; HEYL; ID3;<br/>IGFBP5; MSTN; MYOD1;<br/>MYOG; NSG2; PAK1;<br/>RBFOX2; RXRG; SNAI2;<br/>TGFB1; ZC3H12A</i>                                                                                                | 1  | <i>RAPGEF2</i>                                                                                                        | 14/210 | 1/210  | 15/210 |
| GO:0051216 | cartilage<br>development                                                    | 9  | 210 | 34/3649  | 8.66e-<br>05 | 8.66e-<br>05 | 5.43e-<br>03 | 7  |  | <i>CTSK; FRZB; NPPC;<br/>SCIN; SERPINH1; SNAI2;<br/>TGFB1</i>                                                                                                                                                     | 2  | <i>EDN1; MGP</i>                                                                                                      | 7/210  | 2/210  | 9/210  |
| GO:1902679 | negative<br>regulation of<br>RNA<br>biosynthetic<br>process                 | 21 | 210 | 149/3649 | 9.21e-<br>05 | 9.21e-<br>05 | 5.43e-<br>03 | 14 |  | <i>BHLHE40; CCND1;<br/>CXXC5; EDNRB; ETV6;<br/>FLCN; FOXP1; HEYL;<br/>ID3; IRF1; NR4A2;<br/>RBFOX2; SNAI2; TGFB1</i>                                                                                              | 7  | <i>CITED2;<br/>CRYAB; EDN1;<br/>MYOZ2;<br/>PRMT6; RIOX1;<br/>RNF168</i>                                               | 14/210 | 7/210  | 21/210 |
| GO:1903507 | negative<br>regulation of<br>nucleic acid-<br>templated<br>transcription    | 21 | 210 | 149/3649 | 9.21e-<br>05 | 9.21e-<br>05 | 5.43e-<br>03 | 14 |  | <i>BHLHE40; CCND1;<br/>CXXC5; EDNRB; ETV6;<br/>FLCN; FOXP1; HEYL;<br/>ID3; IRF1; NR4A2;<br/>RBFOX2; SNAI2; TGFB1</i>                                                                                              | 7  | <i>CITED2;<br/>CRYAB; EDN1;<br/>MYOZ2;<br/>PRMT6; RIOX1;<br/>RNF168</i>                                               | 14/210 | 7/210  | 21/210 |
| GO:0048646 | anatomical<br>structure<br>formation<br>involved in<br>morphogenesis        | 23 | 210 | 172/3649 | 9.71e-<br>05 | 9.71e-<br>05 | 5.53e-<br>03 | 12 |  | <i>ACTG1; ANGPT2; APLN;<br/>GJA1; GPR4; HEYL;<br/>LFNG; MYOG; NR4A1;<br/>TMEM100; WARS1;<br/>ZC3H12A</i>                                                                                                          | 11 | <i>C1GALT1;<br/>CITED2;<br/>CSRP3; EDN1;<br/>EDNRA; FGF1;<br/>GLUL; HSPB1;<br/>MYOZ2; RFX2;<br/>THBS2</i>             | 12/210 | 11/210 | 23/210 |
| GO:0007517 | muscle organ<br>development                                                 | 12 | 210 | 60/3649  | 1.16e-<br>04 | 1.16e-<br>04 | 6.37e-<br>03 | 8  |  | <i>GJA1; HEYL; ID3;<br/>MSTN; MYOD1; MYOG;<br/>NR4A1; TGFB1</i>                                                                                                                                                   | 4  | <i>CITED2;<br/>CSRP3; EDNRA;<br/>MYOZ2</i>                                                                            | 8/210  | 4/210  | 12/210 |
| GO:0031324 | negative<br>regulation of<br>cellular<br>metabolic<br>process               | 37 | 210 | 348/3649 | 1.22e-<br>04 | 1.22e-<br>04 | 6.52e-<br>03 | 25 |  | <i>BHLHE40; CCND1;<br/>CGAS; CXXC5; EDNRB;<br/>ETV6; FLCN; FOXP1;<br/>HEYL; ID3; IFI6;<br/>IGFBP5; IRF1; ISG15;<br/>MSTN; NR4A1; NR4A2;<br/>PKIG; RBFOX2; SNAI2;<br/>TGFB1; TGFB2; WARS1;<br/>WFIKN2; ZC3H12A</i> | 12 | <i>BCL2; CITED2;<br/>CRYAB; EDN1;<br/>HSPB1; MYOZ2;<br/>PRMT6;<br/>RAPGEF2;<br/>RIOX1; RNF168;<br/>RNF169; RNF34</i>  | 25/210 | 12/210 | 37/210 |
| GO:0021700 | developmental<br>maturation                                                 | 10 | 210 | 44/3649  | 1.42e-<br>04 | 1.42e-<br>04 | 7.17e-<br>03 | 7  |  | <i>EDNRB; GJA1; NR4A2;<br/>PGRMC1; RND1;<br/>STXBP1; TGFB2</i>                                                                                                                                                    | 3  | <i>EDN1; EDNRA;<br/>KCNMA1</i>                                                                                        | 7/210  | 3/210  | 10/210 |
| GO:0031327 | negative<br>regulation of<br>cellular<br>biosynthetic<br>process            | 24 | 210 | 188/3649 | 1.43e-<br>04 | 1.43e-<br>04 | 7.17e-<br>03 | 16 |  | <i>BHLHE40; CCND1;<br/>CXXC5; EDNRB; ETV6;<br/>FLCN; FOXP1; HEYL;<br/>ID3; IGFBP5; IRF1;<br/>NR4A2; RBFOX2; SNAI2;<br/>TGFB1; ZC3H12A</i>                                                                         | 8  | <i>CITED2;<br/>CRYAB; EDN1;<br/>MYOZ2;<br/>PRMT6;<br/>RAPGEF2;<br/>RIOX1; RNF168</i>                                  | 16/210 | 8/210  | 24/210 |
| GO:0003012 | muscle system<br>process                                                    | 13 | 210 | 71/3649  | 1.55e-<br>04 | 1.55e-<br>04 | 7.55e-<br>03 | 6  |  | <i>EDNRB; IGFBP5;<br/>MYOG; ORMDL3;<br/>TNNT2; ZC3H12A</i>                                                                                                                                                        | 7  | <i>CSRP3; EDN1;<br/>EDNRA;<br/>KCNMA1;<br/>MAP2K6;<br/>MYOZ2; ROCK2</i>                                               | 6/210  | 7/210  | 13/210 |
| GO:0014031 | mesenchymal<br>cell development                                             | 6  | 210 | 16/3649  | 1.67e-<br>04 | 1.67e-<br>04 | 7.67e-<br>03 | 3  |  | <i>EDNRB; HEYL; SNAI2</i>                                                                                                                                                                                         | 3  | <i>CITED2; EDN1;<br/>EDNRA</i>                                                                                        | 3/210  | 3/210  | 6/210  |
| GO:0061448 | connective tissue<br>development                                            | 10 | 210 | 45/3649  | 1.73e-<br>04 | 1.73e-<br>04 | 7.67e-<br>03 | 8  |  | <i>CTSK; FRZB; GPR4;<br/>NPPC; SCIN; SERPINH1;<br/>SNAI2; TGFB1</i>                                                                                                                                               | 2  | <i>EDN1; MGP</i>                                                                                                      | 8/210  | 2/210  | 10/210 |
| GO:0071695 | anatomical<br>structure<br>maturation                                       | 9  | 210 | 37/3649  | 1.77e-<br>04 | 1.77e-<br>04 | 7.67e-<br>03 | 6  |  | <i>EDNRB; GJA1; NR4A2;<br/>PGRMC1; RND1; TGFB2</i>                                                                                                                                                                | 3  | <i>EDN1; EDNRA;<br/>KCNMA1</i>                                                                                        | 6/210  | 3/210  | 9/210  |
| GO:0071902 | positive<br>regulation of<br>protein<br>serine/threonine<br>kinase activity | 9  | 210 | 37/3649  | 1.77e-<br>04 | 1.77e-<br>04 | 7.67e-<br>03 | 4  |  | <i>CCND1; CD40; PAK1;<br/>TGFB1</i>                                                                                                                                                                               | 5  | <i>CAB39; CKS2;<br/>EDN1; MAP2K6;<br/>RAPGEF2</i>                                                                     | 4/210  | 5/210  | 9/210  |
| GO:0045860 | positive<br>regulation of<br>protein kinase<br>activity                     | 12 | 210 | 63/3649  | 1.89e-<br>04 | 1.89e-<br>04 | 7.83e-<br>03 | 6  |  | <i>CCND1; CD40; MOB3C;<br/>PAK1; TGFB1; TGFB2</i>                                                                                                                                                                 | 6  | <i>CAB39; CKS2;<br/>EDN1; FGF1;<br/>MAP2K6;<br/>RAPGEF2</i>                                                           | 6/210  | 6/210  | 12/210 |
| GO:0051253 | negative<br>regulation of<br>RNA metabolic<br>process                       | 22 | 210 | 168/3649 | 1.90e-<br>04 | 1.90e-<br>04 | 7.83e-<br>03 | 15 |  | <i>BHLHE40; CCND1;<br/>CXXC5; EDNRB; ETV6;<br/>FLCN; FOXP1; HEYL;<br/>ID3; IRF1; NR4A2;<br/>RBFOX2; SNAI2; TGFB1;<br/>ZC3H12A</i>                                                                                 | 7  | <i>CITED2;<br/>CRYAB; EDN1;<br/>MYOZ2;<br/>PRMT6; RIOX1;<br/>RNF168</i>                                               | 15/210 | 7/210  | 22/210 |
| GO:0072359 | circulatory<br>system<br>development                                        | 23 | 210 | 180/3649 | 1.96e-<br>04 | 1.96e-<br>04 | 7.90e-<br>03 | 12 |  | <i>ACTG1; ANGPT2; APLN;<br/>GJA1; GPR4; HEYL; ID3;<br/>NR4A1; TGFB2;<br/>TMEM100; WARS1;<br/>ZC3H12A</i>                                                                                                          | 12 | <i>C1GALT1;<br/>CITED2;<br/>CSRP3; ECE2;<br/>ECE2; EDN1;<br/>EDNRA; FGF1;<br/>GLUL; HSPB1;<br/>RAPGEF2;<br/>THBS2</i> | 12/210 | 12/210 | 23/210 |
| GO:1901861 | regulation of<br>muscle tissue<br>development                               | 5  | 210 | 11/3649  | 2.09e-<br>04 | 2.09e-<br>04 | 8.01e-<br>03 | 5  |  | <i>FLCN; GJA1; IGFBP5;<br/>MYOG; TGFB1</i>                                                                                                                                                                        | 0  | 0                                                                                                                     | 5/210  | 0/210  | 5/210  |

|            |                                                            |    |     |          |          |          |          |    |                                                                                                                                                                      |    |                                                                        |        |        |        |
|------------|------------------------------------------------------------|----|-----|----------|----------|----------|----------|----|----------------------------------------------------------------------------------------------------------------------------------------------------------------------|----|------------------------------------------------------------------------|--------|--------|--------|
| GO:0060485 | mesenchyme development                                     | 10 | 210 | 46/3649  | 2.11e-04 | 2.11e-04 | 8.01e-03 | 7  | EDNRB; FRZB; HEYL; SNAI2; TGFB1; TGFB2; TMEM100                                                                                                                      | 3  | CITED2; EDN1; EDNRA                                                    | 7/210  | 3/210  | 10/210 |
| GO:0010558 | negative regulation of macromolecule biosynthetic process  | 23 | 210 | 181/3649 | 2.13e-04 | 2.13e-04 | 8.01e-03 | 16 | BHLHE40; CCND1; CXXC5; EDNRB; ETV6; FLCN; FOXP1; HEYL; ID3; IGFBP5; IRF1; NR4A2; RBFOX2; SNAI2; TGFB1; ZC3H12A                                                       | 7  | CITED2; CRYAB; EDN1; MYOZ2; PRMT6; RIOX1; RNF168                       | 16/210 | 7/210  | 23/210 |
| GO:0014070 | response to organic cyclic compound                        | 16 | 210 | 104/3649 | 2.35e-04 | 2.35e-04 | 8.61e-03 | 15 | ACTB; HEYL; ID3; IGFBP5; MSTN; MYOD1; MYOG; NSG2; PAK1; RBFOX2; RXRG; SNAI2; TGFB1; TGFB2; ZC3H12A                                                                   | 1  | RAPGEF2                                                                | 15/210 | 1/210  | 16/210 |
| GO:0051093 | negative regulation of developmental process               | 17 | 210 | 115/3649 | 2.46e-04 | 2.46e-04 | 8.73e-03 | 14 | ANGPT2; CTSK; EDNRB; FLCN; FRZB; GPR4; ID3; IGFBP5; IRF1; MSTN; SNAI2; SPRY4; TGFB1; ZC3H12A                                                                         | 3  | RAPGEF2; RIOX1; THBS2                                                  | 14/210 | 3/210  | 17/210 |
| GO:0003008 | system process                                             | 26 | 210 | 219/3649 | 2.51e-04 | 2.51e-04 | 8.73e-03 | 18 | APLN; CHRNE; CHRNG; EDNRB; GJA1; GNAT1; GPR4; IGFBP5; INHBB; MYOG; ORMDL3; OXTR; SNAI2; SOBP; TGFB2; TMEM100; TNNT2; ZC3H12A                                         | 8  | ABCC1; CSRP3; EDN1; EDNRA; KCNMA1; MAP2K6; MYOZ2; ROCK2                | 18/210 | 8/210  | 26/210 |
| GO:0009719 | response to endogenous stimulus                            | 25 | 210 | 207/3649 | 2.54e-04 | 2.54e-04 | 8.73e-03 | 18 | ACTB; FLCN; GJA1; HEYL; IGFBP5; INHBB; MSTN; NR4A1; NR4A2; NSG2; PAK1; RBFOX2; RXRG; SNAI2; TGFB1; TGFB2; TMEM100; WFIKK2                                            | 7  | ACVR2A; CITED2; CSRP3; EDN1; EDNRA; FGF1; RAPGEF2                      | 18/210 | 7/210  | 25/210 |
| GO:0009890 | negative regulation of biosynthetic process                | 24 | 210 | 197/3649 | 2.97e-04 | 2.97e-04 | 1.00e-02 | 16 | BHLHE40; CCND1; CXXC5; EDNRB; ETV6; FLCN; FOXP1; HEYL; ID3; IGFBP5; IRF1; NR4A2; RBFOX2; SNAI2; TGFB1; ZC3H12A                                                       | 8  | CITED2; CRYAB; EDN1; MYOZ2; PRMT6; RAPGEF2; RIOX1; RNF168              | 16/210 | 8/210  | 24/210 |
| GO:0045597 | positive regulation of cell differentiation                | 17 | 210 | 117/3649 | 3.04e-04 | 3.04e-04 | 1.00e-02 | 13 | FRZB; GJA1; HEYL; ISG15; MAMSTR; MYOD1; MYOG; NFKBIZ; SCIN; TGFB1; TGFB2; TMEM100; ZC3H12A                                                                           | 4  | ACVR2A; EDN1; NAPEPLD; RAPGEF2                                         | 13/210 | 4/210  | 17/210 |
| GO:0051172 | negative regulation of nitrogen compound metabolic process | 34 | 210 | 324/3649 | 3.10e-04 | 3.10e-04 | 1.00e-02 | 24 | BHLHE40; CCND1; CGAS; CXXC5; EDNRB; ETV6; FLCN; FOXP1; HEYL; ID3; IFI6; IGFBP5; INHBB; IRF1; ISG15; NR4A1; NR4A2; PKIG; RBFOX2; SNAI2; TGFB1; WARS1; WFIKK2; ZC3H12A | 10 | CITED2; CRYAB; EDN1; HSPB1; MYOZ2; PRMT6; RIOX1; RNF168; RNF169; RNF34 | 24/210 | 10/210 | 34/210 |
| GO:0001525 | angiogenesis                                               | 15 | 210 | 97/3649  | 3.48e-04 | 3.48e-04 | 1.11e-02 | 8  | ACTG1; ANGPT2; APLN; GPR4; NR4A1; TMEM100; WARS1; ZC3H12A                                                                                                            | 7  | C1GALT1; EDN1; EDNRA; FGF1; GLUL; HSPB1; THBS2                         | 8/210  | 7/210  | 15/210 |
| GO:0008285 | negative regulation of cell population proliferation       | 14 | 210 | 87/3649  | 3.60e-04 | 3.60e-04 | 1.12e-02 | 13 | ATG101; FLCN; FRZB; GJA1; IGFBP5; IRF1; MSTN; MYOG; PAK1; SCIN; SNAI2; TGFB1; TGFB2                                                                                  | 1  | RAPGEF2                                                                | 13/210 | 1/210  | 14/210 |
| GO:0001568 | blood vessel development                                   | 18 | 210 | 130/3649 | 3.73e-04 | 3.73e-04 | 1.14e-02 | 9  | ACTG1; ANGPT2; APLN; GJA1; GPR4; NR4A1; TMEM100; WARS1; ZC3H12A                                                                                                      | 9  | C1GALT1; CITED2; EDN1; EDNRA; FGF1; GLUL; HSPB1; RAPGEF2; THBS2        | 9/210  | 9/210  | 18/210 |
| GO:0009725 | response to hormone                                        | 15 | 210 | 98/3649  | 3.90e-04 | 3.90e-04 | 1.17e-02 | 11 | HEYL; IGFBP5; INHBB; MSTN; NR4A1; NR4A2; PAK1; RBFOX2; RXRG; TGFB1; TGFB2                                                                                            | 4  | CITED2; CSRP3; EDN1; EDNRA                                             | 11/210 | 4/210  | 15/210 |
| GO:0001503 | ossification                                               | 12 | 210 | 68/3649  | 4.00e-04 | 4.00e-04 | 1.18e-02 | 8  | GJA1; ID3; IGFBP5; ISG15; NPPC; SNAI2; TGFB1; TGFB2                                                                                                                  | 4  | ACVR2A; MAP2K6; MGP; RIOX1                                             | 8/210  | 4/210  | 12/210 |
| GO:0008016 | regulation of heart contraction                            | 8  | 210 | 33/3649  | 4.18e-04 | 4.18e-04 | 1.21e-02 | 5  | APLN; EDNRB; GJA1; TGFB2; ZC3H12A                                                                                                                                    | 3  | CSRP3; EDN1; EDNRA                                                     | 5/210  | 3/210  | 8/210  |
| GO:0035239 | tube morphogenesis                                         | 19 | 210 | 143/3649 | 4.38e-04 | 4.38e-04 | 1.25e-02 | 10 | ACTG1; ANGPT2; APLN; GJA1; GPR4; NR4A1; PAK1; TMEM100; WARS1; ZC3H12A                                                                                                | 9  | C1GALT1; CITED2; EDN1; EDNRA; FGF1; GLUL; HSPB1; RAPGEF2; THBS2        | 10/210 | 9/210  | 19/210 |
| GO:0001837 | epithelial to mesenchymal transition                       | 7  | 210 | 26/3649  | 4.86e-04 | 4.86e-04 | 1.32e-02 | 5  | HEYL; SNAI2; TGFB1; TGFB2; TMEM100                                                                                                                                   | 2  | EDN1; EDNRA                                                            | 5/210  | 2/210  | 7/210  |

|            |                                                                          |    |     |          |          |          |          |    |                                                                                                                                                                                        |    |                                                                                                        |        |        |        |
|------------|--------------------------------------------------------------------------|----|-----|----------|----------|----------|----------|----|----------------------------------------------------------------------------------------------------------------------------------------------------------------------------------------|----|--------------------------------------------------------------------------------------------------------|--------|--------|--------|
| GO:0045216 | cell-cell junction organization                                          | 7  | 210 | 26/3649  | 4.86e-04 | 4.86e-04 | 1.32e-02 | 7  | ACTB; ACTG1; FLCN; GJA1; SNAI2; TGFB1; TGFB2                                                                                                                                           | 0  | 0                                                                                                      | 7/210  | 0/210  | 7/210  |
| GO:0014033 | neural crest cell differentiation                                        | 6  | 210 | 19/3649  | 4.88e-04 | 4.88e-04 | 1.32e-02 | 3  | EDNRB; FRZB; SNAI2                                                                                                                                                                     | 3  | CITED2; EDN1; EDNRA                                                                                    | 3/210  | 3/210  | 6/210  |
| GO:0007162 | negative regulation of cell adhesion                                     | 8  | 210 | 34/3649  | 5.20e-04 | 5.20e-04 | 1.39e-02 | 8  | ANGPT2; IRF1; NOS3; RND1; SNAI2; SPRY4; TGFB1; ZC3H12A                                                                                                                                 | 0  | 0                                                                                                      | 8/210  | 0/210  | 8/210  |
| GO:0001944 | vasculature development                                                  | 18 | 210 | 134/3649 | 5.44e-04 | 5.44e-04 | 1.43e-02 | 9  | ACTG1; ANGPT2; APLN; GJA1; GPR4; NR4A1; TMEM100; WARS1; ZC3H12A                                                                                                                        | 9  | C1GALT1; CITED2; EDN1; EDNRA; FGF1; GLUL; HSPB1; RAPGEF2; THBS2                                        | 9/210  | 9/210  | 18/210 |
| GO:0010648 | negative regulation of cell communication                                | 25 | 210 | 218/3649 | 5.67e-04 | 5.67e-04 | 1.46e-02 | 21 | APLN; FLCN; FRZB; GJA1; GRINA; HEYL; IFI6; IGFBP5; INHBB; ISG15; LFNG; MSTN; NOS3; NR4A2; RASA3; RGS10; RGS19; SH2D1A; SNAI2; SPRY4; ZC3H12A                                           | 4  | CYLD; HSPB1; MYOZ2; RNF34                                                                              | 21/210 | 4/210  | 25/210 |
| GO:0060047 | heart contraction                                                        | 9  | 210 | 43/3649  | 5.92e-04 | 5.92e-04 | 1.50e-02 | 5  | APLN; EDNRB; GJA1; TGFB2; ZC3H12A                                                                                                                                                      | 4  | CSRP3; EDN1; EDNRA; MAP2K6                                                                             | 5/210  | 4/210  | 9/210  |
| GO:0007178 | transmembrane receptor protein serine/threonine kinase signaling pathway | 10 | 210 | 52/3649  | 6.03e-04 | 6.03e-04 | 1.50e-02 | 7  | FLCN; INHBB; MSTN; TGFB1; TGFB2; TMEM100; WFIKK2                                                                                                                                       | 3  | ACVR2A; CITED2; NCEH1                                                                                  | 7/210  | 3/210  | 10/210 |
| GO:0023057 | negative regulation of signaling                                         | 25 | 210 | 219/3649 | 6.08e-04 | 6.08e-04 | 1.50e-02 | 21 | APLN; FLCN; FRZB; GJA1; GRINA; HEYL; IFI6; IGFBP5; INHBB; ISG15; LFNG; MSTN; NOS3; NR4A2; RASA3; RGS10; RGS19; SH2D1A; SNAI2; SPRY4; ZC3H12A                                           | 4  | CYLD; HSPB1; MYOZ2; RNF34                                                                              | 21/210 | 4/210  | 25/210 |
| GO:0071363 | cellular response to growth factor stimulus                              | 14 | 210 | 92/3649  | 6.49e-04 | 6.49e-04 | 1.56e-02 | 9  | FLCN; HEYL; MSTN; NR4A1; SNAI2; TGFB1; TGFB2; TMEM100; WFIKK2                                                                                                                          | 5  | ACVR2A; CITED2; FGF1; HSPB1; RAPGEF2                                                                   | 9/210  | 5/210  | 14/210 |
| GO:0006939 | smooth muscle contraction                                                | 6  | 210 | 20/3649  | 6.63e-04 | 6.63e-04 | 1.56e-02 | 2  | EDNRB; ORMDL3                                                                                                                                                                          | 4  | EDN1; EDNRA; KCNMA1; ROCK2                                                                             | 2/210  | 4/210  | 6/210  |
| GO:0030278 | regulation of ossification                                               | 6  | 210 | 20/3649  | 6.63e-04 | 6.63e-04 | 1.56e-02 | 4  | GJA1; ISG15; TGFB1; TGFB2                                                                                                                                                              | 2  | ACVR2A; MGP                                                                                            | 4/210  | 2/210  | 6/210  |
| GO:0009887 | animal organ morphogenesis                                               | 17 | 210 | 125/3649 | 6.72e-04 | 6.72e-04 | 1.56e-02 | 13 | FRZB; GJA1; GNAT1; HEYL; ID3; IGFBP5; NPPC; SERPINH1; SOBP; TGFB1; TGFB2; TMEM100                                                                                                      | 4  | CITED2; EDN1; EDNRA; FGF1                                                                              | 13/210 | 4/210  | 17/210 |
| GO:0003015 | heart process                                                            | 9  | 210 | 44/3649  | 7.07e-04 | 7.07e-04 | 1.62e-02 | 5  | APLN; EDNRB; GJA1; TGFB2; ZC3H12A                                                                                                                                                      | 4  | CSRP3; EDN1; EDNRA; MAP2K6                                                                             | 5/210  | 4/210  | 9/210  |
| GO:0009892 | negative regulation of metabolic process                                 | 41 | 210 | 436/3649 | 7.47e-04 | 7.47e-04 | 1.68e-02 | 27 | BHLHE40; CCND1; CGAS; CXXC5; EDNRB; ETV6; FLCN; FOXP1; GJA1; HEYL; ID3; IFI6; IGFBP5; INHBB; IRF1; ISG15; MSTN; NR4A1; NR4A2; PKIG; RBOX2; SNAI2; TGFB1; TGFB2; WARS1; WFIKK2; ZC3H12A | 14 | BCL2; CITED2; CRYAB; EDN1; FASTKD3; HSPB1; MAP2K6; MYOZ2; PRMT6; RAPGEF2; RIOX1; RNF168; RNF169; RNF34 | 27/210 | 14/210 | 41/210 |
| GO:0003013 | circulatory system process                                               | 13 | 210 | 83/3649  | 7.64e-04 | 7.64e-04 | 1.68e-02 | 7  | APLN; EDNRB; GJA1; GPR4; OXTR; TGFB2; ZC3H12A                                                                                                                                          | 6  | ABCC1; CSRP3; EDN1; EDNRA; KCNMA1; MAP2K6                                                              | 7/210  | 6/210  | 13/210 |
| GO:0048729 | tissue morphogenesis                                                     | 13 | 210 | 83/3649  | 7.64e-04 | 7.64e-04 | 1.68e-02 | 9  | ACTB; ACTG1; CD44; FRZB; GJA1; HEYL; IGFBP5; PAK1; TMEM100                                                                                                                             | 4  | CITED2; EDN1; EDNRA; FGF1                                                                              | 9/210  | 4/210  | 13/210 |
| GO:0033674 | positive regulation of kinase activity                                   | 12 | 210 | 73/3649  | 7.81e-04 | 7.81e-04 | 1.69e-02 | 6  | CCND1; CD40; MOB3C; PAK1; TGFB1; TGFB2                                                                                                                                                 | 6  | CAB39; CKS2; EDN1; FGF1; MAP2K6; RAPGEF2                                                               | 6/210  | 6/210  | 12/210 |
| GO:0030500 | regulation of bone mineralization                                        | 5  | 210 | 14/3649  | 7.86e-04 | 7.86e-04 | 1.69e-02 | 3  | GJA1; ISG15; TGFB1                                                                                                                                                                     | 2  | ACVR2A; MGP                                                                                            | 3/210  | 2/210  | 5/210  |
| GO:0051094 | positive regulation of developmental process                             | 21 | 210 | 174/3649 | 8.18e-04 | 8.18e-04 | 1.73e-02 | 14 | FRZB; GJA1; HEYL; ISG15; LRRN1; MAMSTR; MYOD1; MYOG; NFKB1; SCIN; TGFB1; TGFB2; TMEM100; ZC3H12A                                                                                       | 7  | ACVR2A; CITED2; EDN1; FGF1; HSPB1; NAPEPLD; RAPGEF2                                                    | 14/210 | 7/210  | 21/210 |
| GO:0002009 | morphogenesis of an epithelium                                           | 11 | 210 | 64/3649  | 8.79e-04 | 8.79e-04 | 1.84e-02 | 7  | ACTB; ACTG1; CD44; FRZB; GJA1; IGFBP5; PAK1                                                                                                                                            | 4  | CITED2; EDN1; EDNRA; FGF1                                                                              | 7/210  | 4/210  | 11/210 |

|            |                                             |    |     |          |          |          |          |    |                                                                                                                                                                                                                             |    |                                                                                         |        |        |        |
|------------|---------------------------------------------|----|-----|----------|----------|----------|----------|----|-----------------------------------------------------------------------------------------------------------------------------------------------------------------------------------------------------------------------------|----|-----------------------------------------------------------------------------------------|--------|--------|--------|
| GO:0070887 | cellular response to chemical stimulus      | 44 | 210 | 483/3649 | 9.19e-04 | 9.19e-04 | 1.90e-02 | 33 | ACTB; ACTG1; ASAH1; CD14; CD44; EDNRB; FLCN; GJA1; HEYL; ID3; IGFBP5; INHBB; IRF1; ISG15; MSTN; MX1; MYOD1; MYOG; NR4A1; NR4A2; NSG2; OAS2; PAK1; RBFOX2; RGS10; RXRG; SNAI2; SPRY4; TGFB1; TGFB2; TMEM100; WFIKK2; ZC3H12A | 11 | ACVR2A; CCRL2; CITED2; CSRP3; CYLD; EDN1; EDNRA; FGF1; HSPB1; NCEH1; RAPGEF2            | 33/210 | 11/210 | 44/210 |
| GO:0007519 | skeletal muscle tissue development          | 8  | 210 | 37/3649  | 9.53e-04 | 9.53e-04 | 1.92e-02 | 6  | HEYL; MSTN; MYOD1; MYOG; NR4A1; TGFB1                                                                                                                                                                                       | 2  | CITED2; MYOZ2                                                                           | 6/210  | 2/210  | 8/210  |
| GO:0060538 | skeletal muscle organ development           | 8  | 210 | 37/3649  | 9.53e-04 | 9.53e-04 | 1.92e-02 | 6  | HEYL; MSTN; MYOD1; MYOG; NR4A1; TGFB1                                                                                                                                                                                       | 2  | CITED2; MYOZ2                                                                           | 6/210  | 2/210  | 8/210  |
| GO:0045596 | negative regulation of cell differentiation | 13 | 210 | 85/3649  | 9.63e-04 | 9.63e-04 | 1.92e-02 | 11 | EDNRB; FLCN; FRZB; ID3; IGFBP5; IRF1; MSTN; SNAI2; SPRY4; TGFB1; ZC3H12A                                                                                                                                                    | 2  | RAPGEF2; RIOX1                                                                          | 11/210 | 2/210  | 13/210 |
| GO:0001649 | osteoblast differentiation                  | 7  | 210 | 29/3649  | 9.95e-04 | 9.95e-04 | 1.95e-02 | 4  | GJA1; ID3; IGFBP5; SNAI2                                                                                                                                                                                                    | 3  | ACVR2A; MAP2K6; RIOX1                                                                   | 4/210  | 3/210  | 7/210  |
| GO:0042692 | muscle cell differentiation                 | 11 | 210 | 65/3649  | 1.01e-03 | 1.01e-03 | 1.95e-02 | 7  | ACTG1; EDNRB; IGFBP5; MAMSTR; MYOD1; MYOG; WFIKK2                                                                                                                                                                           | 4  | CSRP3; EDN1; EDNRA; MYOZ2                                                               | 7/210  | 4/210  | 11/210 |
| GO:0048468 | cell development                            | 27 | 210 | 253/3649 | 1.06e-03 | 1.06e-03 | 2.02e-02 | 18 | ACTG1; ATAT1; EDNRB; FRZB; GJA1; GNAT1; GPR4; HEYL; MYOG; NR4A2; PGRMC1; RND1; SERPINH1; SNAI2; SPRY4; STXBP1; TGFB1; WFIKK2                                                                                                | 9  | C1GALT1; CITED2; CSRP3; EDN1; EDNRA; KCNMA1; MYOZ2; RAPGEF2; RFX2                       | 18/210 | 9/210  | 27/210 |
| GO:0030334 | regulation of cell migration                | 18 | 210 | 142/3649 | 1.10e-03 | 1.10e-03 | 2.02e-02 | 12 | ACTG1; ANGPT2; CNN2; FLCN; GJA1; IGFBP5; MSTN; PAK1; SNAI2; TGFB1; TGFB2; ZC3H12A                                                                                                                                           | 6  | CITED2; EDN1; FGF1; GLUL; HSPB1; RAPGEF2                                                | 12/210 | 6/210  | 18/210 |
| GO:0070848 | response to growth factor                   | 14 | 210 | 97/3649  | 1.11e-03 | 1.11e-03 | 2.02e-02 | 9  | FLCN; HEYL; MSTN; NR4A1; SNAI2; TGFB1; TGFB2; TMEM100; WFIKK2                                                                                                                                                               | 5  | ACVR2A; CITED2; FGF1; HSPB1; RAPGEF2                                                    | 9/210  | 5/210  | 14/210 |
| GO:0014032 | neural crest cell development               | 5  | 210 | 15/3649  | 1.12e-03 | 1.12e-03 | 2.02e-02 | 2  | EDNRB; SNAI2                                                                                                                                                                                                                | 3  | CITED2; EDN1; EDNRA                                                                     | 2/210  | 3/210  | 5/210  |
| GO:0043406 | positive regulation of MAP kinase activity  | 5  | 210 | 15/3649  | 1.12e-03 | 1.12e-03 | 2.02e-02 | 3  | CD40; PAK1; TGFB1                                                                                                                                                                                                           | 2  | EDN1; MAP2K6                                                                            | 3/210  | 2/210  | 5/210  |
| GO:0070167 | regulation of biomineral tissue development | 5  | 210 | 15/3649  | 1.12e-03 | 1.12e-03 | 2.02e-02 | 3  | GJA1; ISG15; TGFB1                                                                                                                                                                                                          | 2  | ACVR2A; MGP                                                                             | 3/210  | 2/210  | 5/210  |
| GO:0110149 | regulation of biomineralization             | 5  | 210 | 15/3649  | 1.12e-03 | 1.12e-03 | 2.02e-02 | 3  | GJA1; ISG15; TGFB1                                                                                                                                                                                                          | 2  | ACVR2A; MGP                                                                             | 3/210  | 2/210  | 5/210  |
| GO:0045859 | regulation of protein kinase activity       | 15 | 210 | 109/3649 | 1.23e-03 | 1.23e-03 | 2.19e-02 | 8  | CCND1; CD40; MOB3C; PAK1; PKIG; TGFB1; TGFB2; WARS1                                                                                                                                                                         | 7  | CAB39; CKS2; EDN1; FGF1; HSPB1; MAP2K6; RAPGEF2                                         | 8/210  | 7/210  | 15/210 |
| GO:0001667 | ameboidal-type cell migration               | 12 | 210 | 77/3649  | 1.27e-03 | 1.27e-03 | 2.24e-02 | 7  | ANGPT2; EDNRB; GJA1; NR4A1; TGFB1; TGFB2; ZC3H12A                                                                                                                                                                           | 5  | EDN1; EDNRA; FGF1; GLUL; HSPB1                                                          | 7/210  | 5/210  | 12/210 |
| GO:0016477 | cell migration                              | 24 | 210 | 218/3649 | 1.32e-03 | 1.32e-03 | 2.29e-02 | 17 | ACTG1; ANGPT2; CD44; CNN2; EDNRB; FLCN; GJA1; IGFBP5; MSTN; NR4A1; NR4A2; PAK1; RHBDL1; SNAI2; TGFB1; TGFB2; ZC3H12A                                                                                                        | 7  | CITED2; EDN1; EDNRA; FGF1; GLUL; HSPB1; RAPGEF2                                         | 17/210 | 7/210  | 24/210 |
| GO:0045444 | fat cell differentiation                    | 9  | 210 | 48/3649  | 1.37e-03 | 1.37e-03 | 2.34e-02 | 8  | ARL4A; FLCN; FRZB; INHBB; NR4A1; NR4A2; TGFB1; ZC3H12A                                                                                                                                                                      | 1  | NAPEPLD                                                                                 | 8/210  | 1/210  | 9/210  |
| GO:1903522 | regulation of blood circulation             | 8  | 210 | 39/3649  | 1.37e-03 | 1.37e-03 | 2.34e-02 | 5  | APLN; EDNRB; GJA1; TGFB2; ZC3H12A                                                                                                                                                                                           | 3  | CSRP3; EDN1; EDNRA                                                                      | 5/210  | 3/210  | 8/210  |
| GO:0008015 | blood circulation                           | 12 | 210 | 78/3649  | 1.43e-03 | 1.43e-03 | 2.40e-02 | 7  | APLN; EDNRB; GJA1; GPR4; OXTR; TGFB2; ZC3H12A                                                                                                                                                                               | 5  | CSRP3; EDN1; EDNRA; KCNMA1; MAP2K6                                                      | 7/210  | 5/210  | 12/210 |
| GO:0012501 | programmed cell death                       | 35 | 210 | 366/3649 | 1.44e-03 | 1.44e-03 | 2.40e-02 | 23 | ASAH1; BLCAP; ETV6; FLCN; FRZB; GJA1; GRINA; IFI6; IRF1; MFSD10; NOS3; NR4A1; NR4A2; ORMDL3; PAK1; S100A14; SCIN; SHISA5; SNAI2; TGFB1; TGFB2; XAF1; ZC3H12A                                                                | 12 | BCL2; CITED2; CRYAB; CYLD; EDNRA; HSPB1; IFT57; KCNMA1; MAP2K6; RAPGEF2; RNF144B; RNF34 | 23/210 | 12/210 | 35/210 |



|            |                                                         |    |     |          |          |          |          |    |                                                                                                                                                                                                       |    |                                                                                        |        |        |        |
|------------|---------------------------------------------------------|----|-----|----------|----------|----------|----------|----|-------------------------------------------------------------------------------------------------------------------------------------------------------------------------------------------------------|----|----------------------------------------------------------------------------------------|--------|--------|--------|
| GO:0048585 | negative regulation of response to stimulus             | 27 | 210 | 259/3649 | 1.51e-03 | 1.51e-03 | 2.47e-02 | 22 | ANGPT2; APLN; CGAS; FLCN; FRZB; GRINA; HEYL; IFI6; IGFBP5; ISG15; LFNG; MACIR; MSTN; NOS3; NR4A2; RASA3; RGS10; RGS19; SH2D1A; SNAI2; SPRY4; ZC3H12A                                                  | 5  | CYLD; HSPB1; MYOZ2; RNF169; RNF34                                                      | 22/210 | 5/210  | 27/210 |
| GO:0010605 | negative regulation of macromolecule metabolic process  | 37 | 210 | 395/3649 | 1.52e-03 | 1.52e-03 | 2.47e-02 | 26 | BHLHE40; CCND1; CGAS; CXXC5; EDNRB; ETV6; FLCN; FOXP1; GJA1; HEYL; ID3; IFI6; IGFBP5; INHBB; IRF1; ISG15; NR4A1; NR4A2; PKIG; RBFOX2; SNAI2; TGFB1; TGFB2; WARS1; WFIKK2; ZC3H12A                     | 11 | CITED2; CRYAB; EDN1; FASTKD3; HSPB1; MYOZ2; PRMT6; RIXO1; RNF168; RNF169; RNF34        | 26/210 | 11/210 | 37/210 |
| GO:0009966 | regulation of signal transduction                       | 41 | 210 | 452/3649 | 1.55e-03 | 1.55e-03 | 2.47e-02 | 29 | APLN; CD40; FLCN; FRZB; GJA1; GRINA; HEYL; IFI6; IGFBP5; IRF1; ISG15; LFNG; MSTN; NOS3; NR4A2; PAK1; RASA3; RELL2; RGS10; RGS19; RHBDF1; SH2D1A; SNAI2; SPRY4; TGFB1; TGFB2; TMEM100; WFIKK2; ZC3H12A | 12 | ACVR2A; CIBAR1; CITED2; CYLD; EDN1; FGF1; HCKTR1; HSPB1; MAP2K6; MYOZ2; RAPGEF2; RNF34 | 29/210 | 12/210 | 41/210 |
| GO:0045445 | myoblast differentiation                                | 5  | 210 | 16/3649  | 1.56e-03 | 1.56e-03 | 2.47e-02 | 5  | ID3; MSTN; MYOD1; MYOG; TGFB1                                                                                                                                                                         | 0  | 0                                                                                      | 5/210  | 0/210  | 5/210  |
| GO:0048864 | stem cell development                                   | 5  | 210 | 16/3649  | 1.56e-03 | 1.56e-03 | 2.47e-02 | 2  | EDNRB; SNAI2                                                                                                                                                                                          | 3  | CITED2; EDN1; EDNRA                                                                    | 2/210  | 3/210  | 5/210  |
| GO:0009968 | negative regulation of signal transduction              | 23 | 210 | 208/3649 | 1.57e-03 | 1.57e-03 | 2.47e-02 | 19 | APLN; FLCN; FRZB; GRINA; HEYL; IFI6; IGFBP5; ISG15; LFNG; MSTN; NOS3; NR4A2; RASA3; RGS10; RGS19; SH2D1A; SNAI2; SPRY4; ZC3H12A                                                                       | 4  | CYLD; HSPB1; MYOZ2; RNF34                                                              | 19/210 | 4/210  | 23/210 |
| GO:0071396 | cellular response to lipid                              | 12 | 210 | 79/3649  | 1.60e-03 | 1.60e-03 | 2.50e-02 | 12 | CD14; HEYL; ID3; MSTN; MYOD1; MYOG; PAK1; RBFOX2; RXRG; SNAI2; TGFB1; ZC3H12A                                                                                                                         | 0  | 0                                                                                      | 12/210 | 0/210  | 12/210 |
| GO:0007507 | heart development                                       | 11 | 210 | 69/3649  | 1.67e-03 | 1.67e-03 | 2.58e-02 | 6  | APLN; GJA1; HEYL; ID3; TGFB2; TMEM100                                                                                                                                                                 | 6  | CITED2; CSRP3; ECE2; ECE2; EDN1; EDNRA                                                 | 6/210  | 6/210  | 11/210 |
| GO:0035050 | embryonic heart tube development                        | 4  | 210 | 10/3649  | 1.70e-03 | 1.70e-03 | 2.60e-02 | 1  | GJA1                                                                                                                                                                                                  | 3  | CITED2; EDN1; EDNRA                                                                    | 1/210  | 3/210  | 4/210  |
| GO:0030335 | positive regulation of cell migration                   | 12 | 210 | 80/3649  | 1.79e-03 | 1.79e-03 | 2.71e-02 | 8  | ACTG1; IGFBP5; MSTN; PAK1; SNAI2; TGFB1; TGFB2; ZC3H12A                                                                                                                                               | 4  | EDN1; FGF1; HSPB1; RAPGEF2                                                             | 8/210  | 4/210  | 12/210 |
| GO:0030155 | regulation of cell adhesion                             | 14 | 210 | 102/3649 | 1.83e-03 | 1.83e-03 | 2.73e-02 | 13 | ACTG1; ANGPT2; FLCN; GPR4; IRF1; NFKBIZ; NOS3; RND1; SNAI2; SPRY4; TGFB1; TGFB2; ZC3H12A                                                                                                              | 1  | CITED2                                                                                 | 13/210 | 1/210  | 14/210 |
| GO:0048732 | gland development                                       | 9  | 210 | 50/3649  | 1.85e-03 | 1.85e-03 | 2.73e-02 | 6  | FRZB; GJA1; IGFBP5; OAS2; TGFB1; TGFB2                                                                                                                                                                | 3  | CITED2; EDN1; EDNRA                                                                    | 6/210  | 3/210  | 9/210  |
| GO:0055001 | muscle cell development                                 | 7  | 210 | 32/3649  | 1.85e-03 | 1.85e-03 | 2.73e-02 | 3  | ACTG1; MYOG; WFIKK2                                                                                                                                                                                   | 4  | CSRP3; EDN1; EDNRA; MYOZ2                                                              | 3/210  | 4/210  | 7/210  |
| GO:0035051 | cardiocyte differentiation                              | 6  | 210 | 24/3649  | 1.90e-03 | 1.90e-03 | 2.77e-02 | 1  | TGFB2                                                                                                                                                                                                 | 6  | CITED2; CSRP3; ECE2; ECE2; EDN1; EDNRA                                                 | 1/210  | 6/210  | 6/210  |
| GO:0051241 | negative regulation of multicellular organismal process | 17 | 210 | 138/3649 | 2.07e-03 | 2.07e-03 | 2.97e-02 | 13 | ANGPT2; CTSK; FLCN; FRZB; GJA1; GPR4; IGFBP5; INHBB; IRF1; SNAI2; TGFB1; TGFB2; ZC3H12A                                                                                                               | 4  | KCNMA1; MAP2K6; RAPGEF2; THBS2                                                         | 13/210 | 4/210  | 17/210 |
| GO:2000145 | regulation of cell motility                             | 18 | 210 | 150/3649 | 2.07e-03 | 2.07e-03 | 2.97e-02 | 12 | ACTG1; ANGPT2; CNN2; FLCN; GJA1; IGFBP5; MSTN; PAK1; SNAI2; TGFB1; TGFB2; ZC3H12A                                                                                                                     | 6  | CITED2; EDN1; FGF1; GLUL; HSPB1; RAPGEF2                                               | 12/210 | 6/210  | 18/210 |
| GO:0006936 | muscle contraction                                      | 9  | 210 | 51/3649  | 2.14e-03 | 2.14e-03 | 3.04e-02 | 4  | EDNRB; ORMDL3; TNNT2; ZC3H12A                                                                                                                                                                         | 5  | EDN1; EDNRA; KCNMA1; MAP2K6; ROCK2                                                     | 4/210  | 5/210  | 9/210  |
| GO:0071900 | regulation of protein serine/threonine kinase activity  | 10 | 210 | 61/3649  | 2.18e-03 | 2.18e-03 | 3.08e-02 | 5  | CCND1; CD40; PAK1; PKIG; TGFB1                                                                                                                                                                        | 5  | CAB39; CKS2; EDN1; MAP2K6; RAPGEF2                                                     | 5/210  | 5/210  | 10/210 |
| GO:1901701 | cellular response to oxygen-containing compound         | 20 | 210 | 176/3649 | 2.30e-03 | 2.30e-03 | 3.22e-02 | 16 | ACTB; CD14; GJA1; ID3; IGFBP5; INHBB; MSTN; MYOD1; MYOG; NR4A1; NR4A2; NSG2; RGS10; SNAI2; TGFB1; ZC3H12A                                                                                             | 4  | CSRP3; EDN1; EDNRA; RAPGEF2                                                            | 16/210 | 4/210  | 20/210 |

|            |                                                    |    |     |          |          |          |          |    |                                                                                                                                                       |    |                                                                                   |        |        |        |
|------------|----------------------------------------------------|----|-----|----------|----------|----------|----------|----|-------------------------------------------------------------------------------------------------------------------------------------------------------|----|-----------------------------------------------------------------------------------|--------|--------|--------|
| GO:0006357 | regulation of transcription by RNA polymerase II   | 25 | 210 | 241/3649 | 2.44e-03 | 2.44e-03 | 3.38e-02 | 16 | BHLHE40; CCND1; CXXC5; EDNRB; ETV6; FLCN; HEYL; IRF1; MAMSTR; MYOD1; MYOG; NR4A1; NR4A2; SNAI2; TGFB1; ZC3H12A                                        | 10 | ACVR2A; CITED2; CKS2; CSRP3; EDN1; FGF1; MYOZ2; RFX2; TSC22D1; TSC22D1            | 16/210 | 10/210 | 25/210 |
| GO:0061035 | regulation of cartilage development                | 4  | 210 | 11/3649  | 2.55e-03 | 2.55e-03 | 3.51e-02 | 4  | CTSK; FRZB; SCIN; SNAI2                                                                                                                               | 0  | 0                                                                                 | 4/210  | 0/210  | 4/210  |
| GO:0033993 | response to lipid                                  | 14 | 210 | 106/3649 | 2.65e-03 | 2.65e-03 | 3.58e-02 | 13 | CD14; HEYL; ID3; MSTN; MYOD1; MYOG; PAK1; RBFOX2; RXRG; SNAI2; TGFB1; TGFB2; ZC3H12A                                                                  | 1  | MAPKAPK3                                                                          | 13/210 | 1/210  | 14/210 |
| GO:0048863 | stem cell differentiation                          | 8  | 210 | 43/3649  | 2.66e-03 | 2.66e-03 | 3.58e-02 | 4  | EDNRB; FRZB; SNAI2; TGFB2                                                                                                                             | 5  | CITED2; ECE2; ECE2; EDN1; EDNRA                                                   | 4/210  | 5/210  | 8/210  |
| GO:0043410 | positive regulation of MAPK cascade                | 11 | 210 | 73/3649  | 2.66e-03 | 2.66e-03 | 3.58e-02 | 6  | CD40; PAK1; RELL2; TGFB1; TGFB2; ZC3H12A                                                                                                              | 5  | EDN1; FGF1; HCTR1; MAP2K6; RAPGEF2                                                | 6/210  | 5/210  | 11/210 |
| GO:0040017 | positive regulation of locomotion                  | 12 | 210 | 84/3649  | 2.74e-03 | 2.74e-03 | 3.59e-02 | 8  | ACTG1; IGFBP5; MSTN; PAK1; SNAI2; TGFB1; TGFB2; ZC3H12A                                                                                               | 4  | EDN1; FGF1; HSPB1; RAPGEF2                                                        | 8/210  | 4/210  | 12/210 |
| GO:2000147 | positive regulation of cell motility               | 12 | 210 | 84/3649  | 2.74e-03 | 2.74e-03 | 3.59e-02 | 8  | ACTG1; IGFBP5; MSTN; PAK1; SNAI2; TGFB1; TGFB2; ZC3H12A                                                                                               | 4  | EDN1; FGF1; HSPB1; RAPGEF2                                                        | 8/210  | 4/210  | 12/210 |
| GO:1901700 | response to oxygen-containing compound             | 24 | 210 | 230/3649 | 2.75e-03 | 2.75e-03 | 3.59e-02 | 17 | ACTB; CD14; GJA1; ID3; IGFBP5; INHBB; MSTN; MYOD1; MYOG; NR4A1; NR4A2; NSG2; RGS10; SNAI2; TGFB1; TGFB2; ZC3H12A                                      | 7  | CSRP3; EDN1; EDNRA; KCNMA1; MAPKAPK3; RAPGEF2; UCP3                               | 17/210 | 7/210  | 24/210 |
| GO:0006915 | apoptotic process                                  | 33 | 210 | 352/3649 | 2.77e-03 | 2.77e-03 | 3.59e-02 | 22 | BLCAP; ETV6; FLCN; FRZB; GJA1; GRINA; IFI6; IRF1; MFSD10; NOS3; NR4A1; NR4A2; ORMDL3; PAK1; S100A14; SCIN; SHISA5; SNAI2; TGFB1; TGFB2; XAF1; ZC3H12A | 11 | BCL2; CITED2; CRYAB; EDNRA; HSPB1; IFT57; KCNMA1; MAP2K6; RAPGEF2; RNF144B; RNF34 | 22/210 | 11/210 | 33/210 |
| GO:0040012 | regulation of locomotion                           | 18 | 210 | 154/3649 | 2.78e-03 | 2.78e-03 | 3.59e-02 | 12 | ACTG1; ANGPT2; CNN2; FLCN; GJA1; IGFBP5; MSTN; PAK1; SNAI2; TGFB1; TGFB2; ZC3H12A                                                                     | 6  | CITED2; EDN1; FGF1; GLUL; HSPB1; RAPGEF2                                          | 12/210 | 6/210  | 18/210 |
| GO:0043549 | regulation of kinase activity                      | 16 | 210 | 130/3649 | 2.81e-03 | 2.81e-03 | 3.60e-02 | 9  | CCND1; CD40; MOB3C; MSTN; PAK1; PKIG; TGFB1; TGFB2; WARS1                                                                                             | 7  | CAB39; CKS2; EDN1; FGF1; HSPB1; MAP2K6; RAPGEF2                                   | 9/210  | 7/210  | 16/210 |
| GO:0043408 | regulation of MAPK cascade                         | 14 | 210 | 107/3649 | 2.90e-03 | 2.90e-03 | 3.68e-02 | 8  | CD40; FLCN; PAK1; RELL2; SPRY4; TGFB1; TGFB2; ZC3H12A                                                                                                 | 6  | CYLD; EDN1; FGF1; HCTR1; MAP2K6; RAPGEF2                                          | 8/210  | 6/210  | 14/210 |
| GO:0048870 | cell motility                                      | 24 | 210 | 233/3649 | 3.27e-03 | 3.27e-03 | 4.09e-02 | 17 | ACTG1; ANGPT2; CD44; CNN2; EDNRB; FLCN; GJA1; IGFBP5; MSTN; NR4A1; NR4A2; PAK1; RHBDF1; SNAI2; TGFB1; TGFB2; ZC3H12A                                  | 7  | CITED2; EDN1; EDNRA; FGF1; GLUL; HSPB1; RAPGEF2                                   | 17/210 | 7/210  | 24/210 |
| GO:0051674 | localization of cell                               | 24 | 210 | 233/3649 | 3.27e-03 | 3.27e-03 | 4.09e-02 | 17 | ACTG1; ANGPT2; CD44; CNN2; EDNRB; FLCN; GJA1; IGFBP5; MSTN; NR4A1; NR4A2; PAK1; RHBDF1; SNAI2; TGFB1; TGFB2; ZC3H12A                                  | 7  | CITED2; EDN1; EDNRA; FGF1; GLUL; HSPB1; RAPGEF2                                   | 17/210 | 7/210  | 24/210 |
| GO:0051272 | positive regulation of cellular component movement | 12 | 210 | 86/3649  | 3.35e-03 | 3.35e-03 | 4.16e-02 | 8  | ACTG1; IGFBP5; MSTN; PAK1; SNAI2; TGFB2; ZC3H12A                                                                                                      | 4  | EDN1; FGF1; HSPB1; RAPGEF2                                                        | 8/210  | 4/210  | 12/210 |
| GO:0051270 | regulation of cellular component movement          | 18 | 210 | 157/3649 | 3.44e-03 | 3.44e-03 | 4.24e-02 | 12 | ACTG1; ANGPT2; CNN2; FLCN; GJA1; IGFBP5; MSTN; PAK1; SNAI2; TGFB1; TGFB2; ZC3H12A                                                                     | 6  | CITED2; EDN1; FGF1; GLUL; HSPB1; RAPGEF2                                          | 12/210 | 6/210  | 18/210 |
| GO:0030522 | intracellular receptor signaling pathway           | 8  | 210 | 45/3649  | 3.57e-03 | 3.57e-03 | 4.29e-02 | 6  | HEYL; NR4A1; NR4A2; PAK1; RBFOX2; SNAI2                                                                                                               | 2  | CITED2; RNF34                                                                     | 6/210  | 2/210  | 8/210  |
| GO:0010646 | regulation of cell communication                   | 42 | 210 | 487/3649 | 3.59e-03 | 3.59e-03 | 4.29e-02 | 30 | APLN; CD40; FLCN; FRZB; GJA1; GRINA; HEYL; IFI6; IGFBP5; INHBB; IRF1; ISG15; LFNG; MSTN; NOS3; NR4A2; PAK1; RASA3; RELL2; RGS10; RGS19;               | 12 | ACVR2A; CIBAR1; CITED2; CYLD; EDN1; FGF1; HCTR1; HSPB1; MAP2K6;                   | 30/210 | 12/210 | 42/210 |

|            |                                                                  |    |     |          |          |          |          |    |  |                                                                                                                                                                                                               |    |                                                                                                          |                       |        |        |  |
|------------|------------------------------------------------------------------|----|-----|----------|----------|----------|----------|----|--|---------------------------------------------------------------------------------------------------------------------------------------------------------------------------------------------------------------|----|----------------------------------------------------------------------------------------------------------|-----------------------|--------|--------|--|
|            |                                                                  |    |     |          |          |          |          |    |  | RHBDF1; SH2D1A; SNAI2; SPRY4; TGFB1; TGFB2; TMEM100; WFIKKN2; ZC3H12A                                                                                                                                         |    |                                                                                                          | MYOZ2; RAPGEF2; RNF34 |        |        |  |
| GO:0010927 | cellular component assembly involved in morphogenesis            | 5  | 210 | 19/3649  | 3.60e-03 | 3.60e-03 | 4.29e-02 | 1  |  | ACTG1                                                                                                                                                                                                         | 4  | CSRP3; EDN1; MYOZ2; RFX2                                                                                 | 1/210                 | 4/210  | 5/210  |  |
| GO:0045667 | regulation of osteoblast differentiation                         | 5  | 210 | 19/3649  | 3.60e-03 | 3.60e-03 | 4.29e-02 | 3  |  | ID3; IGFBP5; SNAI2                                                                                                                                                                                            | 2  | ACVR2A; RIOX1                                                                                            | 3/210                 | 2/210  | 5/210  |  |
| GO:0048584 | positive regulation of response to stimulus                      | 32 | 210 | 344/3649 | 3.64e-03 | 3.64e-03 | 4.29e-02 | 18 |  | ACTB; ACTG1; C4A; CD40; CGAS; FLCN; GJA1; GPR4; IGFBP5; MSTN; MYOG; NFKBIZ; PAK1; RELL2; SH2D1A; TGFB1; TGFB2; ZC3H12A                                                                                        | 14 | ABCC1; ACVR2A; CIBAR1; CITED2; EDN1; FGF1; HCRTR1; HSPB1; MAP2K6; NAPEPLD; RAPGEF2; RBBP8; RNF168; USP13 | 18/210                | 14/210 | 32/210 |  |
| GO:0003151 | outflow tract morphogenesis                                      | 4  | 210 | 12/3649  | 3.66e-03 | 3.66e-03 | 4.29e-02 | 1  |  | HEYL                                                                                                                                                                                                          | 3  | CITED2; EDN1; EDNRA                                                                                      | 1/210                 | 3/210  | 4/210  |  |
| GO:0045778 | positive regulation of ossification                              | 4  | 210 | 12/3649  | 3.66e-03 | 3.66e-03 | 4.29e-02 | 3  |  | ISG15; TGFB1; TGFB2                                                                                                                                                                                           | 1  | ACVR2A                                                                                                   | 3/210                 | 1/210  | 4/210  |  |
| GO:0008283 | cell population proliferation                                    | 26 | 210 | 262/3649 | 3.72e-03 | 3.72e-03 | 4.32e-02 | 20 |  | ATG101; CNN2; ETV6; FLCN; FRZB; GJA1; GNAT1; IGFBP5; IRF1; MARCKSL1; MSTN; MYOG; NPPC; NR4A1; PAK1; RHBDF1; SCIN; SNAI2; TGFB1; TGFB2                                                                         | 6  | CITED2; CKS2; EDN1; FGF1; RAPGEF2; USP13                                                                 | 20/210                | 6/210  | 26/210 |  |
| GO:0008219 | cell death                                                       | 35 | 210 | 387/3649 | 3.76e-03 | 3.76e-03 | 4.33e-02 | 23 |  | ASAH1; BLCAP; ETV6; FLCN; FRZB; GJA1; GRINA; IFI6; IRF1; MFSD10; NOS3; NR4A1; NR4A2; ORMDL3; PAK1; S100A14; SCIN; SHISA5; SNAI2; TGFB1; TGFB2; XAF1; ZC3H12A                                                  | 12 | BCL2; CITED2; CRYAB; CYLD; EDNRA; HSPB1; IFT57; KCNMA1; MAP2K6; RAPGEF2; RNF144B; RNF34                  | 23/210                | 12/210 | 35/210 |  |
| GO:0048545 | response to steroid hormone                                      | 7  | 210 | 36/3649  | 3.77e-03 | 3.77e-03 | 4.33e-02 | 7  |  | HEYL; MSTN; PAK1; RBFOX2; RXRG; TGFB1; TGFB2                                                                                                                                                                  | 0  | 0                                                                                                        | 7/210                 | 0/210  | 7/210  |  |
| GO:0023051 | regulation of signaling                                          | 42 | 210 | 489/3649 | 3.88e-03 | 3.88e-03 | 4.42e-02 | 30 |  | APLN; CD40; FLCN; FRZB; GJA1; GRINA; HEYL; IFI6; IGFBP5; INHBB; IRF1; ISG15; LFNG; MSTN; NOS3; NR4A2; PAK1; RASA3; RELL2; RGS10; RGS19; RHBDF1; SH2D1A; SNAI2; SPRY4; TGFB1; TGFB2; TMEM100; WFIKKN2; ZC3H12A | 12 | ACVR2A; CIBAR1; CITED2; CYLD; EDN1; FGF1; HCRTR1; HSPB1; MAP2K6; MYOZ2; RAPGEF2; RNF34                   | 30/210                | 12/210 | 42/210 |  |
| GO:0007169 | transmembrane receptor protein tyrosine kinase signaling pathway | 11 | 210 | 77/3649  | 4.08e-03 | 4.08e-03 | 4.60e-02 | 7  |  | ANGPT2; IFI6; IGFBP5; MSTN; PAK1; RHBDF1; TGFB1                                                                                                                                                               | 4  | CSRP3; FGF1; HSPB1; RAPGEF2                                                                              | 7/210                 | 4/210  | 11/210 |  |
| GO:0001822 | kidney development                                               | 8  | 210 | 46/3649  | 4.12e-03 | 4.12e-03 | 4.60e-02 | 5  |  | EDNRB; FLCN; GPR4; HEYL; ID3                                                                                                                                                                                  | 3  | C1GALT1; EDNRA; FGF1                                                                                     | 5/210                 | 3/210  | 8/210  |  |
| GO:0045765 | regulation of angiogenesis                                       | 8  | 210 | 46/3649  | 4.12e-03 | 4.12e-03 | 4.60e-02 | 4  |  | ANGPT2; GPR4; WARS1; ZC3H12A                                                                                                                                                                                  | 4  | FGF1; GLUL; HSPB1; THBS2                                                                                 | 4/210                 | 4/210  | 8/210  |  |
| GO:0044092 | negative regulation of molecular function                        | 20 | 210 | 186/3649 | 4.40e-03 | 4.40e-03 | 4.85e-02 | 16 |  | ACTB; BHLHE40; GNAT1; HEYL; ID3; IFI6; INKA2; MSTN; NR4A1; ORMDL3; PKIG; PPP1R1B; TGFB2; WARS1; WFIKKN2; ZC3H12A                                                                                              | 4  | ANXA9; CYLD; HSPB1; RNF34                                                                                | 16/210                | 4/210  | 20/210 |  |
| GO:0003007 | heart morphogenesis                                              | 7  | 210 | 37/3649  | 4.43e-03 | 4.43e-03 | 4.85e-02 | 4  |  | GJA1; HEYL; TGFB2; TMEM100                                                                                                                                                                                    | 3  | CITED2; EDN1; EDNRA                                                                                      | 4/210                 | 3/210  | 7/210  |  |
| GO:0001934 | positive regulation of protein phosphorylation                   | 14 | 210 | 112/3649 | 4.43e-03 | 4.43e-03 | 4.85e-02 | 7  |  | CCND1; CD40; FLCN; MOB3C; PAK1; TGFB1; TGFB2                                                                                                                                                                  | 7  | ACVR2A; CAB39; CKS2; EDN1; FGF1; MAP2K6; RAPGEF2                                                         | 7/210                 | 7/210  | 14/210 |  |
| GO:0002062 | chondrocyte differentiation                                      | 5  | 210 | 20/3649  | 4.58e-03 | 4.58e-03 | 4.98e-02 | 5  |  | NPPC; SCIN; SERPINH1; SNAI2; TGFB1                                                                                                                                                                            | 0  | 0                                                                                                        | 5/210                 | 0/210  | 5/210  |  |
| GO:0051146 | striated muscle cell differentiation                             | 8  | 210 | 47/3649  | 4.72e-03 | 4.72e-03 | 5.06e-02 | 5  |  | ACTG1; IGFBP5; MAMSTR; MYOD1; MYOG                                                                                                                                                                            | 3  | CSRP3; EDN1; MYOZ2                                                                                       | 5/210                 | 3/210  | 8/210  |  |
| GO:1901342 | regulation of vasculature development                            | 8  | 210 | 47/3649  | 4.72e-03 | 4.72e-03 | 5.06e-02 | 4  |  | ANGPT2; GPR4; WARS1; ZC3H12A                                                                                                                                                                                  | 4  | FGF1; GLUL; HSPB1; THBS2                                                                                 | 4/210                 | 4/210  | 8/210  |  |

|            |                                                           |    |     |          |          |          |          |    |                                                                                                                |    |                                                                                |        |        |        |
|------------|-----------------------------------------------------------|----|-----|----------|----------|----------|----------|----|----------------------------------------------------------------------------------------------------------------|----|--------------------------------------------------------------------------------|--------|--------|--------|
| GO:0051347 | positive regulation of transferase activity               | 12 | 210 | 90/3649  | 4.89e-03 | 4.89e-03 | 5.18e-02 | 6  | CCND1; CD40; MOB3C; PAK1; TGFB1; TGFB2                                                                         | 6  | CAB39; CKS2; EDN1; FGF1; MAP2K6; RAPGEF2                                       | 6/210  | 6/210  | 12/210 |
| GO:0071417 | cellular response to organonitrogen compound              | 12 | 210 | 90/3649  | 4.89e-03 | 4.89e-03 | 5.18e-02 | 8  | ACTB; GJA1; IGFBP5; INHBB; MSTN; NR4A1; NR4A2; NSG2                                                            | 4  | CSRP3; EDN1; EDNRA; RAPGEF2                                                    | 8/210  | 4/210  | 12/210 |
| GO:0030239 | myofibril assembly                                        | 4  | 210 | 13/3649  | 5.05e-03 | 5.05e-03 | 5.21e-02 | 1  | ACTG1                                                                                                          | 3  | CSRP3; EDN1; MYOZ2                                                             | 1/210  | 3/210  | 4/210  |
| GO:0045661 | regulation of myoblast differentiation                    | 4  | 210 | 13/3649  | 5.05e-03 | 5.05e-03 | 5.21e-02 | 4  | ID3; MSTN; MYOG; TGFB1                                                                                         | 0  | 0                                                                              | 4/210  | 0/210  | 4/210  |
| GO:0051149 | positive regulation of muscle cell differentiation        | 4  | 210 | 13/3649  | 5.05e-03 | 5.05e-03 | 5.21e-02 | 3  | MAMSTR; MYOD1; MYOG                                                                                            | 1  | EDN1                                                                           | 3/210  | 1/210  | 4/210  |
| GO:0055002 | striated muscle cell development                          | 4  | 210 | 13/3649  | 5.05e-03 | 5.05e-03 | 5.21e-02 | 1  | ACTG1                                                                                                          | 3  | CSRP3; EDN1; MYOZ2                                                             | 1/210  | 3/210  | 4/210  |
| GO:0045926 | negative regulation of growth                             | 7  | 210 | 38/3649  | 5.17e-03 | 5.17e-03 | 5.31e-02 | 7  | FLCN; FRZB; GJA1; IGFBP5; MSTN; TGFB1; TGFB2                                                                   | 0  | 0                                                                              | 7/210  | 0/210  | 7/210  |
| GO:1901652 | response to peptide                                       | 9  | 210 | 58/3649  | 5.27e-03 | 5.27e-03 | 5.37e-02 | 6  | GJA1; IGFBP5; INHBB; MSTN; NR4A1; NR4A2                                                                        | 3  | CSRP3; EDN1; EDNRA                                                             | 6/210  | 3/210  | 9/210  |
| GO:0072001 | renal system development                                  | 8  | 210 | 48/3649  | 5.39e-03 | 5.39e-03 | 5.46e-02 | 5  | EDNRB; FLCN; GPR4; HEYL; ID3                                                                                   | 3  | C1GALT1; EDNRA; FGF1                                                           | 5/210  | 3/210  | 8/210  |
| GO:0006366 | transcription by RNA polymerase II                        | 26 | 210 | 271/3649 | 5.86e-03 | 5.86e-03 | 5.90e-02 | 16 | BHLHE40; CCND1; CXXC5; EDNRB; ETV6; FLCN; HEYL; IRF1; MAMSTR; MYOD1; MYOG; NR4A1; NR4A2; SNAI2; TGFB1; ZC3H12A | 11 | ACVR2A; CITED2; CKS2; CSRP3; EDN1; FGF1; MYOZ2; RFX2; RNF168; TSC22D1; TSC22D1 | 16/210 | 11/210 | 26/210 |
| GO:0032870 | cellular response to hormone stimulus                     | 11 | 210 | 81/3649  | 6.05e-03 | 6.05e-03 | 6.06e-02 | 8  | HEYL; INHBB; MSTN; NR4A1; NR4A2; PAK1; RBOX2; RXRG                                                             | 3  | CSRP3; EDN1; EDNRA                                                             | 8/210  | 3/210  | 11/210 |
| GO:0043434 | response to peptide hormone                               | 8  | 210 | 49/3649  | 6.13e-03 | 6.13e-03 | 6.10e-02 | 5  | IGFBP5; INHBB; MSTN; NR4A1; NR4A2                                                                              | 3  | CSRP3; EDN1; EDNRA                                                             | 5/210  | 3/210  | 8/210  |
| GO:0000122 | negative regulation of transcription by RNA polymerase II | 12 | 210 | 93/3649  | 6.39e-03 | 6.39e-03 | 6.28e-02 | 9  | BHLHE40; CCND1; CXXC5; EDNRB; ETV6; FLCN; HEYL; NR4A2; SNAI2                                                   | 3  | CITED2; EDN1; MYOZ2                                                            | 9/210  | 3/210  | 12/210 |
| GO:0030855 | epithelial cell differentiation                           | 12 | 210 | 93/3649  | 6.39e-03 | 6.39e-03 | 6.28e-02 | 8  | ASAH1; EDNRB; FRZB; GJA1; GPR4; ID3; PTER; TMEM100                                                             | 4  | C1GALT1; EDNRA; KCNMA1; RAPGEF2                                                | 8/210  | 4/210  | 12/210 |
| GO:0006672 | ceramide metabolic process                                | 4  | 210 | 14/3649  | 6.75e-03 | 6.75e-03 | 6.58e-02 | 3  | ASAH1; ORMDL3; PLPP2                                                                                           | 1  | NEU3                                                                           | 3/210  | 1/210  | 4/210  |
| GO:0045944 | positive regulation of transcription by RNA polymerase II | 16 | 210 | 142/3649 | 6.78e-03 | 6.78e-03 | 6.58e-02 | 11 | ETV6; FLCN; HEYL; IRF1; MAMSTR; MYOD1; MYOG; NR4A1; NR4A2; TGFB1; ZC3H12A                                      | 5  | ACVR2A; CITED2; CSRP3; EDN1; FGF1                                              | 11/210 | 5/210  | 16/210 |
| GO:1901653 | cellular response to peptide                              | 8  | 210 | 50/3649  | 6.95e-03 | 6.95e-03 | 6.71e-02 | 5  | GJA1; INHBB; MSTN; NR4A1; NR4A2                                                                                | 3  | CSRP3; EDN1; EDNRA                                                             | 5/210  | 3/210  | 8/210  |
| GO:1901699 | cellular response to nitrogen compound                    | 13 | 210 | 106/3649 | 7.09e-03 | 7.09e-03 | 6.81e-02 | 9  | ACTB; GJA1; IGFBP5; INHBB; MSTN; NR4A1; NR4A2; NSG2; RGS10                                                     | 4  | CSRP3; EDN1; EDNRA; RAPGEF2                                                    | 9/210  | 4/210  | 13/210 |
| GO:0032101 | regulation of response to external stimulus               | 17 | 210 | 156/3649 | 7.43e-03 | 7.43e-03 | 7.09e-02 | 12 | ANGPT2; CGAS; GPR4; ISG15; MAC1; MSTN; MYOD1; NFKB1; SH2D1A; SNAI2; TGFB1; ZC3H12A                             | 5  | ABCC1; CYLD; FGF1; HSPB1; NAPEPLD                                              | 12/210 | 5/210  | 17/210 |
| GO:0051338 | regulation of transferase activity                        | 17 | 210 | 157/3649 | 7.91e-03 | 7.91e-03 | 7.49e-02 | 10 | CCND1; CD40; MOB3C; MSTN; ORMDL3; PAK1; PKIG; TGFB1; TGFB2; WARS1                                              | 7  | CAB39; CKS2; EDN1; FGF1; HSPB1; MAP2K6; RAPGEF2                                | 10/210 | 7/210  | 17/210 |
| GO:0071375 | cellular response to peptide hormone stimulus             | 7  | 210 | 41/3649  | 7.96e-03 | 7.96e-03 | 7.49e-02 | 4  | INHBB; MSTN; NR4A1; NR4A2                                                                                      | 3  | CSRP3; EDN1; EDNRA                                                             | 4/210  | 3/210  | 7/210  |
| GO:0001932 | regulation of protein phosphorylation                     | 18 | 210 | 170/3649 | 7.98e-03 | 7.98e-03 | 7.49e-02 | 10 | CCND1; CD40; FLCN; MOB3C; PAK1; PKIG; TGFB1; TGFB2; WARS1; ZC3H12A                                             | 8  | ACVR2A; CAB39; CKS2; EDN1; FGF1; HSPB1; MAP2K6; RAPGEF2                        | 10/210 | 8/210  | 18/210 |
| GO:0007423 | sensory organ development                                 | 9  | 210 | 62/3649  | 8.22e-03 | 8.22e-03 | 7.67e-02 | 5  | FRZB; GJA1; GNAT1; SOBP; TGFB2                                                                                 | 4  | CITED2; EDN1; EDNRA; KCNMA1                                                    | 5/210  | 4/210  | 9/210  |
| GO:0007179 | transforming growth factor beta receptor                  | 6  | 210 | 32/3649  | 8.69e-03 | 8.69e-03 | 7.88e-02 | 5  | FLCN; MSTN; TGFB1; TGFB2; WIFKKN2                                                                              | 1  | CITED2                                                                         | 5/210  | 1/210  | 6/210  |

[illegible]

|            |                                                     |    |     |          |          |          |          |    |                                                                                                                                                                      |    |                                                                              |        |        |        |
|------------|-----------------------------------------------------|----|-----|----------|----------|----------|----------|----|----------------------------------------------------------------------------------------------------------------------------------------------------------------------|----|------------------------------------------------------------------------------|--------|--------|--------|
| GO:0050790 | regulation of catalytic activity                    | 34 | 210 | 404/3649 | 1.30e-02 | 1.30e-02 | 1.06e-01 | 23 | CCND1; CD40; GNAT1; GPRC5C; IFI6; INKA2; MOB3C; MSTN; NOS3; NR4A1; NR4A2; ORMDL3; PAK1; PKIG; PPP1R1B; RABEP2; RASA3; RASGRP2; RGS10; TGFB1; TGFB2; WARS1; WFIKK2    | 11 | ANXA9; CAB39; CKS2; EDN1; FGF1; HSPB1; IFTS7; MAP2K6; RAPGEF2; RCAN2; RNF34  | 23/210 | 11/210 | 34/210 |
| GO:0070371 | ERK1 and ERK2 cascade                               | 7  | 210 | 45/3649  | 1.32e-02 | 1.32e-02 | 1.08e-01 | 3  | FLCN; SPRY4; TGFB1                                                                                                                                                   | 4  | EDN1; FGF1; HCRTR1; RAPGEF2                                                  | 3/210  | 4/210  | 7/210  |
| GO:0090257 | regulation of muscle system process                 | 7  | 210 | 45/3649  | 1.32e-02 | 1.32e-02 | 1.08e-01 | 5  | IGFBP5; MYOG; ORMDL3; TNNT2; ZC3H12A                                                                                                                                 | 2  | EDN1; KCNMA1                                                                 | 5/210  | 2/210  | 7/210  |
| GO:0031032 | actomyosin structure organization                   | 6  | 210 | 35/3649  | 1.35e-02 | 1.35e-02 | 1.09e-01 | 3  | ACTG1; CNN2; PAK1                                                                                                                                                    | 3  | CSRP3; EDN1; MYO22                                                           | 3/210  | 3/210  | 6/210  |
| GO:0048562 | embryonic organ morphogenesis                       | 6  | 210 | 35/3649  | 1.35e-02 | 1.35e-02 | 1.09e-01 | 3  | FRZB; GJA1; SOBP                                                                                                                                                     | 3  | CITED2; EDN1; EDNRA                                                          | 3/210  | 3/210  | 6/210  |
| GO:0001558 | regulation of cell growth                           | 8  | 210 | 56/3649  | 1.37e-02 | 1.37e-02 | 1.09e-01 | 7  | CXCL16; FLCN; FRZB; GJA1; IGFBP5; TGFB1; TGFB2                                                                                                                       | 1  | EDN1                                                                         | 7/210  | 1/210  | 8/210  |
| GO:0048568 | embryonic organ development                         | 8  | 210 | 56/3649  | 1.37e-02 | 1.37e-02 | 1.09e-01 | 5  | FRZB; GJA1; ID3; SOBP; TGFB2                                                                                                                                         | 3  | CITED2; EDN1; EDNRA                                                          | 5/210  | 3/210  | 8/210  |
| GO:0006636 | unsaturated fatty acid biosynthetic process         | 4  | 210 | 17/3649  | 1.40e-02 | 1.40e-02 | 1.10e-01 | 3  | ELOVL5; ELOVL7; FADS3                                                                                                                                                | 1  | EDN1                                                                         | 3/210  | 1/210  | 4/210  |
| GO:0007043 | cell-cell junction assembly                         | 4  | 210 | 17/3649  | 1.40e-02 | 1.40e-02 | 1.10e-01 | 4  | ACTB; ACTG1; FLCN; SNAI2                                                                                                                                             | 0  | 0                                                                            | 4/210  | 0/210  | 4/210  |
| GO:0030879 | mammary gland development                           | 4  | 210 | 17/3649  | 1.40e-02 | 1.40e-02 | 1.10e-01 | 4  | GJA1; IGFBP5; OAS2; TGFB1                                                                                                                                            | 0  | 0                                                                            | 4/210  | 0/210  | 4/210  |
| GO:0045639 | positive regulation of myeloid cell differentiation | 4  | 210 | 17/3649  | 1.40e-02 | 1.40e-02 | 1.10e-01 | 3  | ISG15; SCIN; TGFB1                                                                                                                                                   | 1  | ACVR2A                                                                       | 3/210  | 1/210  | 4/210  |
| GO:0140352 | export from cell                                    | 12 | 210 | 103/3649 | 1.41e-02 | 1.41e-02 | 1.10e-01 | 9  | EDNRB; EXOC3L1; GJA1; INHBB; PAK1; RHBDF1; SCIN; TGFB1; TGFB2                                                                                                        | 3  | ABCC1; EDN1; MICAL3                                                          | 9/210  | 3/210  | 12/210 |
| GO:0032989 | cellular component morphogenesis                    | 11 | 210 | 91/3649  | 1.43e-02 | 1.43e-02 | 1.11e-01 | 5  | ACTG1; CD44; GJA1; NR4A2; STXBP1                                                                                                                                     | 6  | CSRP3; EDN1; EDNRA; MYO22; RAPGEF2; RFX2                                     | 5/210  | 6/210  | 11/210 |
| GO:0001659 | temperature homeostasis                             | 5  | 210 | 26/3649  | 1.47e-02 | 1.47e-02 | 1.12e-01 | 3  | FLCN; GJA1; OXTR                                                                                                                                                     | 2  | MAP2K6; NAPEPLD                                                              | 3/210  | 2/210  | 5/210  |
| GO:0006665 | sphingolipid metabolic process                      | 5  | 210 | 26/3649  | 1.47e-02 | 1.47e-02 | 1.12e-01 | 4  | ASAH1; FADS3; ORMDL3; PLPP2                                                                                                                                          | 1  | NEU3                                                                         | 4/210  | 1/210  | 5/210  |
| GO:0072006 | nephron development                                 | 5  | 210 | 26/3649  | 1.47e-02 | 1.47e-02 | 1.12e-01 | 3  | EDNRB; GPR4; HEYL                                                                                                                                                    | 2  | EDNRA; FGF1                                                                  | 3/210  | 2/210  | 5/210  |
| GO:0046903 | secretion                                           | 13 | 210 | 116/3649 | 1.47e-02 | 1.47e-02 | 1.12e-01 | 10 | EDNRB; EXOC3L1; GJA1; INHBB; OAS2; PAK1; RHBDF1; SCIN; TGFB1; TGFB2                                                                                                  | 3  | EDN1; KCNMA1; MICAL3                                                         | 10/210 | 3/210  | 13/210 |
| GO:0006164 | purine nucleotide biosynthetic process              | 7  | 210 | 46/3649  | 1.49e-02 | 1.49e-02 | 1.12e-01 | 7  | ADSS1; ELOVL5; ELOVL7; FLCN; NOS3; NPPC; TGFB1                                                                                                                       | 0  | 0                                                                            | 7/210  | 0/210  | 7/210  |
| GO:0030336 | negative regulation of cell migration               | 7  | 210 | 46/3649  | 1.49e-02 | 1.49e-02 | 1.12e-01 | 6  | ANGPT2; CNN2; FLCN; GJA1; IGFBP5; TGFB1                                                                                                                              | 1  | CITED2                                                                       | 6/210  | 1/210  | 7/210  |
| GO:0071496 | cellular response to external stimulus              | 7  | 210 | 46/3649  | 1.49e-02 | 1.49e-02 | 1.12e-01 | 7  | CD40; CNN2; FLCN; INHBB; NR4A2; SNAI2; ZC3H12A                                                                                                                       | 0  | 0                                                                            | 7/210  | 0/210  | 7/210  |
| GO:0035556 | intracellular signal transduction                   | 35 | 210 | 423/3649 | 1.50e-02 | 1.50e-02 | 1.12e-01 | 24 | CCND1; CD40; CGAS; EDNRB; FLCN; GJA1; GRINA; IFI6; IGFBP5; MSTN; PAK1; PLD2; RASA3; RASGRP2; RELL2; RHOF; RND1; SHISA5; SNAI2; SPRY4; TGFB1; TGFB2; TMEM100; ZC3H12A | 11 | CSRP3; CYLD; EDN1; EDNRA; FGF1; HCRTR1; HSPB1; MAP2K6; MYO22; RAPGEF2; RNF34 | 24/210 | 11/210 | 35/210 |
| GO:0022603 | regulation of anatomical structure morphogenesis    | 14 | 210 | 129/3649 | 1.51e-02 | 1.51e-02 | 1.12e-01 | 7  | ANGPT2; CD44; GJA1; GPR4; SPRY4; WARS1; ZC3H12A                                                                                                                      | 7  | CITED2; FGF1; FITM2; GLUL; HSPB1; RAPGEF2; THBS2                             | 7/210  | 7/210  | 14/210 |
| GO:0003018 | vascular process in circulatory system              | 6  | 210 | 36/3649  | 1.54e-02 | 1.54e-02 | 1.13e-01 | 2  | EDNRB; GPR4                                                                                                                                                          | 4  | ABCC1; EDN1; EDNRA; KCNMA1                                                   | 2/210  | 4/210  | 6/210  |
| GO:0019932 | second-messenger-mediated signaling                 | 6  | 210 | 36/3649  | 1.54e-02 | 1.54e-02 | 1.13e-01 | 3  | CGAS; EDNRB; TMEM100                                                                                                                                                 | 3  | EDN1; MYO22; RAPGEF2                                                         | 3/210  | 3/210  | 6/210  |

|            |                                                             |    |     |          |          |          |          |    |                                                                                                                                                 |    |                                                                                                                         |        |        |        |
|------------|-------------------------------------------------------------|----|-----|----------|----------|----------|----------|----|-------------------------------------------------------------------------------------------------------------------------------------------------|----|-------------------------------------------------------------------------------------------------------------------------|--------|--------|--------|
| GO:0031214 | biomineral tissue development                               | 6  | 210 | 36/3649  | 1.54e-02 | 1.54e-02 | 1.13e-01 | 4  | <i>GJA1; ISG15; TGFB1; TUF1</i>                                                                                                                 | 2  | <i>ACVR2A; MGP</i>                                                                                                      | 4/210  | 2/210  | 6/210  |
| GO:0110148 | biomineralization                                           | 6  | 210 | 36/3649  | 1.54e-02 | 1.54e-02 | 1.13e-01 | 4  | <i>GJA1; ISG15; TGFB1; TUF1</i>                                                                                                                 | 2  | <i>ACVR2A; MGP</i>                                                                                                      | 4/210  | 2/210  | 6/210  |
| GO:0042325 | regulation of phosphorylation                               | 19 | 210 | 196/3649 | 1.61e-02 | 1.61e-02 | 1.14e-01 | 11 | <i>CCND1; CD40; FLCN; MOB3C; MSTN; PAK1; PKIG; TGFB1; TGFB2; WARS1; ZC3H12A</i>                                                                 | 8  | <i>ACVR2A; CAB39; CKS2; EDN1; FGF1; HSPB1; MAP2K6; RAPGEF2</i>                                                          | 11/210 | 8/210  | 19/210 |
| GO:0006355 | regulation of transcription, DNA-templated                  | 35 | 210 | 425/3649 | 1.61e-02 | 1.61e-02 | 1.14e-01 | 20 | <i>BHLHE40; CCND1; CXXC5; EDNRB; ETV6; FLCN; FOXF1; HEYL; ID3; IRF1; MAMSTR; MSTN; MYOD1; MYOG; NR4A1; NR4A2; RBFOX2; SNAI2; TGFB1; ZC3H12A</i> | 16 | <i>ACVR2A; CITED2; CKS2; CRYAB; CSRP3; CYLD; EDN1; FGF1; MYOZ2; PRMT6; RFX2; RIOX1; RNF168; TSC22D1; TSC22D1; USP13</i> | 20/210 | 16/210 | 35/210 |
| GO:0006928 | movement of cell or subcellular component                   | 25 | 210 | 280/3649 | 1.65e-02 | 1.65e-02 | 1.14e-01 | 18 | <i>ACTG1; ANGPT2; CD44; CNN2; EDNRB; FLCN; GJA1; IGFBP5; KIF3C; MSTN; NR4A1; NR4A2; PAK1; RHBDF1; SNAI2; TGFB1; TGFB2; ZC3H12A</i>              | 7  | <i>CITED2; EDN1; EDNRA; FGF1; GLUL; HSPB1; RAPGEF2</i>                                                                  | 18/210 | 7/210  | 25/210 |
| GO:2001234 | negative regulation of apoptotic signaling pathway          | 7  | 210 | 47/3649  | 1.66e-02 | 1.66e-02 | 1.14e-01 | 5  | <i>GRINA; IFI6; NOS3; NR4A2; SNAI2</i>                                                                                                          | 2  | <i>HSPB1; RNF34</i>                                                                                                     | 5/210  | 2/210  | 7/210  |
| GO:1903506 | regulation of nucleic acid-templated transcription          | 35 | 210 | 426/3649 | 1.66e-02 | 1.66e-02 | 1.14e-01 | 20 | <i>BHLHE40; CCND1; CXXC5; EDNRB; ETV6; FLCN; FOXF1; HEYL; ID3; IRF1; MAMSTR; MSTN; MYOD1; MYOG; NR4A1; NR4A2; RBFOX2; SNAI2; TGFB1; ZC3H12A</i> | 16 | <i>ACVR2A; CITED2; CKS2; CRYAB; CSRP3; CYLD; EDN1; FGF1; MYOZ2; PRMT6; RFX2; RIOX1; RNF168; TSC22D1; TSC22D1; USP13</i> | 20/210 | 16/210 | 35/210 |
| GO:0009994 | oocyte differentiation                                      | 3  | 210 | 10/3649  | 1.67e-02 | 1.67e-02 | 1.14e-01 | 1  | <i>PGRMC1</i>                                                                                                                                   | 2  | <i>EDN1; EDNRA</i>                                                                                                      | 1/210  | 2/210  | 3/210  |
| GO:0048599 | oocyte development                                          | 3  | 210 | 10/3649  | 1.67e-02 | 1.67e-02 | 1.14e-01 | 1  | <i>PGRMC1</i>                                                                                                                                   | 2  | <i>EDN1; EDNRA</i>                                                                                                      | 1/210  | 2/210  | 3/210  |
| GO:0050873 | brown fat cell differentiation                              | 3  | 210 | 10/3649  | 1.67e-02 | 1.67e-02 | 1.14e-01 | 2  | <i>ARL4A; FLCN</i>                                                                                                                              | 1  | <i>NAPEPLD</i>                                                                                                          | 2/210  | 1/210  | 3/210  |
| GO:0051155 | positive regulation of striated muscle cell differentiation | 3  | 210 | 10/3649  | 1.67e-02 | 1.67e-02 | 1.14e-01 | 2  | <i>MAMSTR; MYOG</i>                                                                                                                             | 1  | <i>EDN1</i>                                                                                                             | 2/210  | 1/210  | 3/210  |
| GO:0060389 | pathway-restricted SMAD protein phosphorylation             | 3  | 210 | 10/3649  | 1.67e-02 | 1.67e-02 | 1.14e-01 | 2  | <i>TGFB1; TGFB2</i>                                                                                                                             | 1  | <i>ACVR2A</i>                                                                                                           | 2/210  | 1/210  | 3/210  |
| GO:0060840 | artery development                                          | 3  | 210 | 10/3649  | 1.67e-02 | 1.67e-02 | 1.14e-01 | 0  | <i>0</i>                                                                                                                                        | 3  | <i>CITED2; EDN1; EDNRA</i>                                                                                              | 0/210  | 3/210  | 3/210  |
| GO:0070293 | renal absorption                                            | 3  | 210 | 10/3649  | 1.67e-02 | 1.67e-02 | 1.14e-01 | 1  | <i>EDNRB</i>                                                                                                                                    | 2  | <i>EDN1; EDNRA</i>                                                                                                      | 1/210  | 2/210  | 3/210  |
| GO:1900744 | regulation of p38MAPK cascade                               | 3  | 210 | 10/3649  | 1.67e-02 | 1.67e-02 | 1.14e-01 | 2  | <i>RELL2; ZC3H12A</i>                                                                                                                           | 1  | <i>CYLD</i>                                                                                                             | 2/210  | 1/210  | 3/210  |
| GO:1901568 | fatty acid derivative metabolic process                     | 3  | 210 | 10/3649  | 1.67e-02 | 1.67e-02 | 1.14e-01 | 2  | <i>ELOVL5; ELOVL7</i>                                                                                                                           | 1  | <i>FITM2</i>                                                                                                            | 2/210  | 1/210  | 3/210  |
| GO:1902414 | protein localization to cell junction                       | 3  | 210 | 10/3649  | 1.67e-02 | 1.67e-02 | 1.14e-01 | 2  | <i>ACTB; ACTG1</i>                                                                                                                              | 1  | <i>HSPB1</i>                                                                                                            | 2/210  | 1/210  | 3/210  |
| GO:0043086 | negative regulation of catalytic activity                   | 14 | 210 | 131/3649 | 1.71e-02 | 1.71e-02 | 1.16e-01 | 11 | <i>GNAT1; IFI6; INKA2; MSTN; NR4A1; ORMDL3; PKIG; PPP1R1B; TGFB2; WARS1; WFIKK2</i>                                                             | 3  | <i>ANXA9; HSPB1; RNF34</i>                                                                                              | 11/210 | 3/210  | 14/210 |
| GO:0030282 | bone mineralization                                         | 5  | 210 | 27/3649  | 1.72e-02 | 1.72e-02 | 1.16e-01 | 3  | <i>GJA1; ISG15; TGFB1</i>                                                                                                                       | 2  | <i>ACVR2A; MGP</i>                                                                                                      | 3/210  | 2/210  | 5/210  |
| GO:0030308 | negative regulation of cell growth                          | 5  | 210 | 27/3649  | 1.72e-02 | 1.72e-02 | 1.16e-01 | 5  | <i>FLCN; FRZB; GJA1; TGFB1; TGFB2</i>                                                                                                           | 0  | <i>0</i>                                                                                                                | 5/210  | 0/210  | 5/210  |
| GO:0019218 | regulation of steroid metabolic process                     | 4  | 210 | 18/3649  | 1.72e-02 | 1.72e-02 | 1.16e-01 | 2  | <i>ASAHI; SNAI2</i>                                                                                                                             | 2  | <i>FGF1; KCNMA1</i>                                                                                                     | 2/210  | 2/210  | 4/210  |
| GO:2001141 | regulation of RNA biosynthetic process                      | 35 | 210 | 428/3649 | 1.78e-02 | 1.78e-02 | 1.19e-01 | 20 | <i>BHLHE40; CCND1; CXXC5; EDNRB; ETV6; FLCN; FOXF1; HEYL; ID3; IRF1; MAMSTR; MSTN; MYOD1; MYOG;</i>                                             | 16 | <i>ACVR2A; CITED2; CKS2; CRYAB; CSRP3; CYLD; EDN1; FGF1; MYOZ2;</i>                                                     | 20/210 | 16/210 | 35/210 |

|            |                                                               |    |     |          |          |          |          |    | NR4A1; NR4A2;<br>RFX2; SNAI2; TGFB1;<br>ZC3H12A                                |   |                                         | PRMT6; RFX2;<br>RFX1; RNF168;<br>TSC22D1;<br>TSC22D1;<br>USP13 |       |        |  |
|------------|---------------------------------------------------------------|----|-----|----------|----------|----------|----------|----|--------------------------------------------------------------------------------|---|-----------------------------------------|----------------------------------------------------------------|-------|--------|--|
| GO:2000146 | negative regulation of cell motility                          | 7  | 210 | 48/3649  | 1.85e-02 | 1.85e-02 | 1.24e-01 | 6  | ANGPT2; CNN2; FLCN; GJA1; IGFBP5; TGFB1                                        | 1 | CITED2                                  | 6/210                                                          | 1/210 | 7/210  |  |
| GO:0008217 | regulation of blood pressure                                  | 5  | 210 | 28/3649  | 2.00e-02 | 2.00e-02 | 1.32e-01 | 3  | APLN; EDNRB; OXTR                                                              | 2 | EDN1; EDNRA                             | 3/210                                                          | 2/210 | 5/210  |  |
| GO:0010634 | positive regulation of epithelial cell migration              | 5  | 210 | 28/3649  | 2.00e-02 | 2.00e-02 | 1.32e-01 | 3  | TGFB1; TGFB2; ZC3H12A                                                          | 2 | FGF1; HSPB1                             | 3/210                                                          | 2/210 | 5/210  |  |
| GO:0048771 | tissue remodeling                                             | 5  | 210 | 28/3649  | 2.00e-02 | 2.00e-02 | 1.32e-01 | 4  | CTSK; GJA1; IGFBP5; TGFB1                                                      | 1 | EDNRA                                   | 4/210                                                          | 1/210 | 5/210  |  |
| GO:0010632 | regulation of epithelial cell migration                       | 7  | 210 | 49/3649  | 2.06e-02 | 2.06e-02 | 1.34e-01 | 4  | ANGPT2; TGFB1; TGFB2; ZC3H12A                                                  | 3 | FGF1; GLUL; HSPB1                       | 4/210                                                          | 3/210 | 7/210  |  |
| GO:0040013 | negative regulation of locomotion                             | 7  | 210 | 49/3649  | 2.06e-02 | 2.06e-02 | 1.34e-01 | 6  | ANGPT2; CNN2; FLCN; GJA1; IGFBP5; TGFB1                                        | 1 | CITED2                                  | 6/210                                                          | 1/210 | 7/210  |  |
| GO:0051271 | negative regulation of cellular component movement            | 7  | 210 | 49/3649  | 2.06e-02 | 2.06e-02 | 1.34e-01 | 6  | ANGPT2; CNN2; FLCN; GJA1; IGFBP5; TGFB1                                        | 1 | CITED2                                  | 6/210                                                          | 1/210 | 7/210  |  |
| GO:0043401 | steroid hormone mediated signaling pathway                    | 4  | 210 | 19/3649  | 2.09e-02 | 2.09e-02 | 1.34e-01 | 4  | HEYL; PAK1; RFX2; RXRG                                                         | 0 | 0                                       | 4/210                                                          | 0/210 | 4/210  |  |
| GO:0051147 | regulation of muscle cell differentiation                     | 4  | 210 | 19/3649  | 2.09e-02 | 2.09e-02 | 1.34e-01 | 3  | MAMSTR; MYOD1; MYOG                                                            | 1 | EDN1                                    | 3/210                                                          | 1/210 | 4/210  |  |
| GO:0106106 | cold-induced thermogenesis                                    | 4  | 210 | 19/3649  | 2.09e-02 | 2.09e-02 | 1.34e-01 | 3  | FLCN; GJA1; OXTR                                                               | 1 | MAP2K6                                  | 3/210                                                          | 1/210 | 4/210  |  |
| GO:0120161 | regulation of cold-induced thermogenesis                      | 4  | 210 | 19/3649  | 2.09e-02 | 2.09e-02 | 1.34e-01 | 3  | FLCN; GJA1; OXTR                                                               | 1 | MAP2K6                                  | 3/210                                                          | 1/210 | 4/210  |  |
| GO:0002027 | regulation of heart rate                                      | 3  | 210 | 11/3649  | 2.20e-02 | 2.20e-02 | 1.36e-01 | 1  | EDNRB                                                                          | 2 | EDN1; EDNRA                             | 1/210                                                          | 2/210 | 3/210  |  |
| GO:0007585 | respiratory gaseous exchange by respiratory system            | 3  | 210 | 11/3649  | 2.20e-02 | 2.20e-02 | 1.36e-01 | 1  | NR4A2                                                                          | 2 | EDN1; EDNRA                             | 1/210                                                          | 2/210 | 3/210  |  |
| GO:0030501 | positive regulation of bone mineralization                    | 3  | 210 | 11/3649  | 2.20e-02 | 2.20e-02 | 1.36e-01 | 2  | ISG15; TGFB1                                                                   | 1 | ACVR2A                                  | 2/210                                                          | 1/210 | 3/210  |  |
| GO:0035914 | skeletal muscle cell differentiation                          | 3  | 210 | 11/3649  | 2.20e-02 | 2.20e-02 | 1.36e-01 | 2  | HEYL; NR4A1                                                                    | 1 | CITED2                                  | 2/210                                                          | 1/210 | 3/210  |  |
| GO:0038066 | p38MAPK cascade                                               | 3  | 210 | 11/3649  | 2.20e-02 | 2.20e-02 | 1.36e-01 | 2  | RELL2; ZC3H12A                                                                 | 1 | CYLD                                    | 2/210                                                          | 1/210 | 3/210  |  |
| GO:0043403 | skeletal muscle tissue regeneration                           | 3  | 210 | 11/3649  | 2.20e-02 | 2.20e-02 | 1.36e-01 | 3  | GJA1; MSTN; MYOD1                                                              | 0 | 0                                       | 3/210                                                          | 0/210 | 3/210  |  |
| GO:0061028 | establishment of endothelial barrier                          | 3  | 210 | 11/3649  | 2.20e-02 | 2.20e-02 | 1.36e-01 | 1  | EDNRB                                                                          | 2 | EDNRA; RAPGEF2                          | 1/210                                                          | 2/210 | 3/210  |  |
| GO:0070169 | positive regulation of biomineral tissue development          | 3  | 210 | 11/3649  | 2.20e-02 | 2.20e-02 | 1.36e-01 | 2  | ISG15; TGFB1                                                                   | 1 | ACVR2A                                  | 2/210                                                          | 1/210 | 3/210  |  |
| GO:0110151 | positive regulation of biomineralization                      | 3  | 210 | 11/3649  | 2.20e-02 | 2.20e-02 | 1.36e-01 | 2  | ISG15; TGFB1                                                                   | 1 | ACVR2A                                  | 2/210                                                          | 1/210 | 3/210  |  |
| GO:0010817 | regulation of hormone levels                                  | 8  | 210 | 61/3649  | 2.22e-02 | 2.22e-02 | 1.37e-01 | 5  | CTSK; EDNRB; EXOC3L1; GJA1; INHBB                                              | 4 | ECE2; ECE2; EDN1; KCNMA1                | 5/210                                                          | 4/210 | 8/210  |  |
| GO:0007267 | cell-cell signaling                                           | 16 | 210 | 162/3649 | 2.24e-02 | 2.24e-02 | 1.37e-01 | 11 | CGAS; CHRNE; CHRNA; EDNRB; EXOC3L1; FRZB; GJA1; INHBB; RGS10; SH2D1A; SNAI2    | 5 | ARL6; CYLD; EDN1; EDNRA; KCNMA1         | 11/210                                                         | 5/210 | 16/210 |  |
| GO:0043491 | protein kinase B signaling                                    | 6  | 210 | 39/3649  | 2.24e-02 | 2.24e-02 | 1.37e-01 | 6  | CD40; FLCN; IGFBP5; MSTN; TGFB1; TMEM100                                       | 0 | 0                                       | 6/210                                                          | 0/210 | 6/210  |  |
| GO:0071560 | cellular response to transforming growth factor beta stimulus | 6  | 210 | 39/3649  | 2.24e-02 | 2.24e-02 | 1.37e-01 | 5  | FLCN; MSTN; TGFB1; TGFB2; WIFKKN2                                              | 1 | CITED2                                  | 5/210                                                          | 1/210 | 6/210  |  |
| GO:0019220 | regulation of phosphate metabolic process                     | 20 | 210 | 217/3649 | 2.27e-02 | 2.27e-02 | 1.38e-01 | 12 | CCND1; CD40; FLCN; MOB3C; MSTN; NOS3; PAK1; PKIG; TGFB1; TGFB2; WARS1; ZC3H12A | 8 | ACVR2A; CAB39; CKS2; EDN1; FGF1; HSPB1; | 12/210                                                         | 8/210 | 20/210 |  |



|            |                                                                     |    |     |          |          |          |          |    |                                                                                                            |    |                                                                            |        |        |        |
|------------|---------------------------------------------------------------------|----|-----|----------|----------|----------|----------|----|------------------------------------------------------------------------------------------------------------|----|----------------------------------------------------------------------------|--------|--------|--------|
| GO:0051174 | regulation of phosphorus metabolic process                          | 20 | 210 | 217/3649 | 2.27e-02 | 2.27e-02 | 1.38e-01 | 12 | CCND1; CD40; FLCN; MOB3C; MSTN; NOS3; PAK1; PKIG; TGFB1; TGFB2; WARS1; ZC3H12A                             | 8  | MAP2K6; RAPGEF2<br>ACVR2A; CAB39; CKS2; EDN1; FGF1; HSPB1; MAP2K6; RAPGEF2 | 12/210 | 8/210  | 20/210 |
| GO:0046942 | carboxylic acid transport                                           | 5  | 210 | 29/3649  | 2.30e-02 | 2.30e-02 | 1.38e-01 | 2  | GJA1; SLC25A29                                                                                             | 3  | ABCC1; SLC35D1; SLC43A2                                                    | 2/210  | 3/210  | 5/210  |
| GO:0034097 | response to cytokine                                                | 14 | 210 | 136/3649 | 2.30e-02 | 2.30e-02 | 1.38e-01 | 10 | ACTG1; ASAHI; CD44; CXCL16; IRF1; ISG15; MX1; OAS2; SPRY4; ZC3H12A                                         | 4  | CCRL2; CYLD; EDN1; MAPKAPK3                                                | 10/210 | 4/210  | 14/210 |
| GO:0010941 | regulation of cell death                                            | 24 | 210 | 274/3649 | 2.31e-02 | 2.31e-02 | 1.38e-01 | 14 | ASAH1; FLCN; FRZB; GJA1; GRINA; IFI6; NOS3; NR4A1; NR4A2; ORMDL3; SCIN; SNAI2; TGFB2; ZC3H12A              | 10 | BCL2; CITED2; CRYAB; CYLD; HSPB1; IFT57; KCNMA1; RAPGEF2; RNF144B; RNF34   | 14/210 | 10/210 | 24/210 |
| GO:0080135 | regulation of cellular response to stress                           | 13 | 210 | 123/3649 | 2.31e-02 | 2.31e-02 | 1.38e-01 | 7  | ACTB; CGAS; GRINA; RELL2; SNAI2; TGFB2; ZC3H12A                                                            | 6  | CYLD; HSPB1; RBBP8; RNF168; RNF169; USP13                                  | 7/210  | 6/210  | 13/210 |
| GO:0042981 | regulation of apoptotic process                                     | 22 | 210 | 246/3649 | 2.36e-02 | 2.36e-02 | 1.40e-01 | 13 | FLCN; FRZB; GJA1; GRINA; IFI6; NOS3; NR4A1; NR4A2; ORMDL3; SCIN; SNAI2; TGFB2; ZC3H12A                     | 9  | BCL2; CITED2; CRYAB; HSPB1; IFT57; KCNMA1; RAPGEF2; RNF144B; RNF34         | 13/210 | 9/210  | 22/210 |
| GO:0042127 | regulation of cell population proliferation                         | 19 | 210 | 204/3649 | 2.36e-02 | 2.36e-02 | 1.40e-01 | 16 | ATG101; CNN2; FLCN; FRZB; GJA1; IGFBP5; IRF1; MARCKSL1; MSTN; MYOG; NR4A1; PAK1; SCIN; SNAI2; TGFB1; TGFB2 | 3  | EDN1; FGF1; RAPGEF2                                                        | 16/210 | 3/210  | 19/210 |
| GO:1902532 | negative regulation of intracellular signal transduction            | 11 | 210 | 98/3649  | 2.38e-02 | 2.38e-02 | 1.41e-01 | 7  | FLCN; GRINA; MSTN; RASA3; SNAI2; SPRY4; ZC3H12A                                                            | 4  | CYLD; HSPB1; MYOZ2; RNF34                                                  | 7/210  | 4/210  | 11/210 |
| GO:0031401 | positive regulation of protein modification process                 | 15 | 210 | 150/3649 | 2.41e-02 | 2.41e-02 | 1.42e-01 | 8  | CCND1; CD40; FLCN; MOB3C; PAK1; TGFB1; TGFB2; ZC3H12A                                                      | 7  | ACVR2A; CAB39; CKS2; EDN1; FGF1; MAP2K6; RAPGEF2                           | 8/210  | 7/210  | 15/210 |
| GO:0032103 | positive regulation of response to external stimulus                | 9  | 210 | 74/3649  | 2.47e-02 | 2.47e-02 | 1.43e-01 | 6  | CGAS; GPR4; MSTN; NFKBIZ; SH2D1A; TGFB1                                                                    | 3  | ABCC1; HSPB1; NAPEPLD                                                      | 6/210  | 3/210  | 9/210  |
| GO:0018958 | phenol-containing compound metabolic process                        | 4  | 210 | 20/3649  | 2.49e-02 | 2.49e-02 | 1.43e-01 | 2  | CTSK; NR4A2                                                                                                | 2  | EDNRA; RAPGEF2                                                             | 2/210  | 2/210  | 4/210  |
| GO:0019724 | B cell mediated immunity                                            | 4  | 210 | 20/3649  | 2.49e-02 | 2.49e-02 | 1.43e-01 | 3  | C4A; CD40; TGFB1                                                                                           | 1  | RNF168                                                                     | 3/210  | 1/210  | 4/210  |
| GO:0032640 | tumor necrosis factor production                                    | 4  | 210 | 20/3649  | 2.49e-02 | 2.49e-02 | 1.43e-01 | 3  | CD14; OAS2; ZC3H12A                                                                                        | 1  | HSPB1                                                                      | 3/210  | 1/210  | 4/210  |
| GO:0032680 | regulation of tumor necrosis factor production                      | 4  | 210 | 20/3649  | 2.49e-02 | 2.49e-02 | 1.43e-01 | 3  | CD14; OAS2; ZC3H12A                                                                                        | 1  | HSPB1                                                                      | 3/210  | 1/210  | 4/210  |
| GO:0045446 | endothelial cell differentiation                                    | 4  | 210 | 20/3649  | 2.49e-02 | 2.49e-02 | 1.43e-01 | 2  | EDNRB; TMEM100                                                                                             | 2  | EDNRA; RAPGEF2                                                             | 2/210  | 2/210  | 4/210  |
| GO:0071706 | tumor necrosis factor superfamily cytokine production               | 4  | 210 | 20/3649  | 2.49e-02 | 2.49e-02 | 1.43e-01 | 3  | CD14; OAS2; ZC3H12A                                                                                        | 1  | HSPB1                                                                      | 3/210  | 1/210  | 4/210  |
| GO:1903555 | regulation of tumor necrosis factor superfamily cytokine production | 4  | 210 | 20/3649  | 2.49e-02 | 2.49e-02 | 1.43e-01 | 3  | CD14; OAS2; ZC3H12A                                                                                        | 1  | HSPB1                                                                      | 3/210  | 1/210  | 4/210  |
| GO:0043542 | endothelial cell migration                                          | 7  | 210 | 51/3649  | 2.52e-02 | 2.52e-02 | 1.44e-01 | 4  | ANGPT2; NR4A1; TGFB1; ZC3H12A                                                                              | 3  | FGF1; GLUL; HSPB1                                                          | 4/210  | 3/210  | 7/210  |
| GO:0072522 | purine-containing compound biosynthetic process                     | 7  | 210 | 51/3649  | 2.52e-02 | 2.52e-02 | 1.44e-01 | 7  | ADSS1; ELOVL5; ELOVL7; FLCN; NOS3; NPPC; TGFB1                                                             | 0  | 0                                                                          | 7/210  | 0/210  | 7/210  |
| GO:0032940 | secretion by cell                                                   | 11 | 210 | 99/3649  | 2.54e-02 | 2.54e-02 | 1.44e-01 | 9  | EDNRB; EXOC3L1; GJA1; INHBB; PAK1;                                                                         | 2  | EDN1; MICAL3                                                               | 9/210  | 2/210  | 11/210 |

|            |                                                                |    |     |          |          |          |          |    |                                                                                                                                                 |    |                                                                                                    |        |        |        |
|------------|----------------------------------------------------------------|----|-----|----------|----------|----------|----------|----|-------------------------------------------------------------------------------------------------------------------------------------------------|----|----------------------------------------------------------------------------------------------------|--------|--------|--------|
|            |                                                                |    |     |          |          |          |          |    | <i>RHBDF1; SCIN; TGFB1;<br/>TGFB2</i>                                                                                                           |    |                                                                                                    |        |        |        |
| GO:0031399 | regulation of protein modification process                     | 21 | 210 | 234/3649 | 2.58e-02 | 2.58e-02 | 1.46e-01 | 12 | <i>ATG101; CCND1; CD40; FLCN; ISG15; MOB3C; PAK1; PKIG; TGFB1; TGFB2; WARS1; ZC3H12A</i>                                                        | 9  | <i>ACVR2A; CAB39; CKS2; EDN1; FGF1; HSPB1; MAP2K6; PRMT6; RAPGEF2</i>                              | 12/210 | 9/210  | 21/210 |
| GO:0043405 | regulation of MAP kinase activity                              | 5  | 210 | 30/3649  | 2.64e-02 | 2.64e-02 | 1.47e-01 | 3  | <i>CD40; PAK1; TGFB1</i>                                                                                                                        | 2  | <i>EDN1; MAP2K6</i>                                                                                | 3/210  | 2/210  | 5/210  |
| GO:0051403 | stress-activated MAPK cascade                                  | 5  | 210 | 30/3649  | 2.64e-02 | 2.64e-02 | 1.47e-01 | 3  | <i>RELL2; TGFB2; ZC3H12A</i>                                                                                                                    | 2  | <i>CYLD; MAP2K6</i>                                                                                | 3/210  | 2/210  | 5/210  |
| GO:0071383 | cellular response to steroid hormone stimulus                  | 5  | 210 | 30/3649  | 2.64e-02 | 2.64e-02 | 1.47e-01 | 5  | <i>HEYL; MSTN; PAK1; RBFOX2; RXRG</i>                                                                                                           | 0  | 0                                                                                                  | 5/210  | 0/210  | 5/210  |
| GO:0010631 | epithelial cell migration                                      | 8  | 210 | 63/3649  | 2.65e-02 | 2.65e-02 | 1.47e-01 | 5  | <i>ANGPT2; NR4A1; TGFB1; TGFB2; ZC3H12A</i>                                                                                                     | 3  | <i>FGF1; GLUL; HSPB1</i>                                                                           | 5/210  | 3/210  | 8/210  |
| GO:0090132 | epithelium migration                                           | 8  | 210 | 63/3649  | 2.65e-02 | 2.65e-02 | 1.47e-01 | 5  | <i>ANGPT2; NR4A1; TGFB1; TGFB2; ZC3H12A</i>                                                                                                     | 3  | <i>FGF1; GLUL; HSPB1</i>                                                                           | 5/210  | 3/210  | 8/210  |
| GO:0080134 | regulation of response to stress                               | 21 | 210 | 235/3649 | 2.69e-02 | 2.69e-02 | 1.49e-01 | 13 | <i>ACTB; ACTG1; CGAS; GPR4; GRINA; ISG15; MAC1R; NFKBIZ; RELL2; SH2D1A; SNAI2; TGFB2; ZC3H12A</i>                                               | 8  | <i>ABCC1; CYLD; HSPB1; NAPEPLD; RBBP8; RNF168; RNF169; USP13</i>                                   | 13/210 | 8/210  | 21/210 |
| GO:0032879 | regulation of localization                                     | 33 | 210 | 411/3649 | 2.71e-02 | 2.71e-02 | 1.49e-01 | 20 | <i>ACTB; ACTG1; ANGPT2; APLN; CACNB3; CNN2; FLCN; GJA1; IGFBP5; INHBB; MSTN; OAS2; ORMDL3; PAK1; RHBDF1; SCIN; SNAI2; TGFB1; TGFB2; ZC3H12A</i> | 13 | <i>CCT3; CITED2; CRYAB; CSRP3; EDN1; EDNRA; FGF1; FITM2; GLUL; HSPB1; KCNMA1; RAPGEF2; SLC43A2</i> | 20/210 | 13/210 | 33/210 |
| GO:0010594 | regulation of endothelial cell migration                       | 6  | 210 | 41/3649  | 2.81e-02 | 2.81e-02 | 1.49e-01 | 3  | <i>ANGPT2; TGFB1; ZC3H12A</i>                                                                                                                   | 3  | <i>FGF1; GLUL; HSPB1</i>                                                                           | 3/210  | 3/210  | 6/210  |
| GO:0060348 | bone development                                               | 6  | 210 | 41/3649  | 2.81e-02 | 2.81e-02 | 1.49e-01 | 4  | <i>GJA1; NPPC; SERPINH1; TRIM45</i>                                                                                                             | 2  | <i>CITED2; MAP2K6</i>                                                                              | 4/210  | 2/210  | 6/210  |
| GO:0070372 | regulation of ERK1 and ERK2 cascade                            | 6  | 210 | 41/3649  | 2.81e-02 | 2.81e-02 | 1.49e-01 | 3  | <i>FLCN; SPRY4; TGFB1</i>                                                                                                                       | 3  | <i>FGF1; HCRTR1; RAPGEF2</i>                                                                       | 3/210  | 3/210  | 6/210  |
| GO:0071559 | response to transforming growth factor beta                    | 6  | 210 | 41/3649  | 2.81e-02 | 2.81e-02 | 1.49e-01 | 5  | <i>FLCN; MSTN; TGFB1; TGFB2; WFIKK2</i>                                                                                                         | 1  | <i>CITED2</i>                                                                                      | 5/210  | 1/210  | 6/210  |
| GO:0006809 | nitric oxide biosynthetic process                              | 3  | 210 | 12/3649  | 2.81e-02 | 2.81e-02 | 1.49e-01 | 3  | <i>DDAH2; NOS3; ZC3H12A</i>                                                                                                                     | 0  | 0                                                                                                  | 3/210  | 0/210  | 3/210  |
| GO:0021675 | nerve development                                              | 3  | 210 | 12/3649  | 2.81e-02 | 2.81e-02 | 1.49e-01 | 0  | 0                                                                                                                                               | 3  | <i>CITED2; EDN1; EDNRA</i>                                                                         | 0/210  | 3/210  | 3/210  |
| GO:0030042 | actin filament depolymerization                                | 3  | 210 | 12/3649  | 2.81e-02 | 2.81e-02 | 1.49e-01 | 1  | <i>SCIN</i>                                                                                                                                     | 2  | <i>DSTN; MICAL3</i>                                                                                | 1/210  | 2/210  | 3/210  |
| GO:0035270 | endocrine system development                                   | 3  | 210 | 12/3649  | 2.81e-02 | 2.81e-02 | 1.49e-01 | 0  | 0                                                                                                                                               | 3  | <i>CITED2; EDN1; EDNRA</i>                                                                         | 0/210  | 3/210  | 3/210  |
| GO:0035850 | epithelial cell differentiation involved in kidney development | 3  | 210 | 12/3649  | 2.81e-02 | 2.81e-02 | 1.49e-01 | 2  | <i>EDNRB; GPR4</i>                                                                                                                              | 1  | <i>EDNRA</i>                                                                                       | 2/210  | 1/210  | 3/210  |
| GO:0051153 | regulation of striated muscle cell differentiation             | 3  | 210 | 12/3649  | 2.81e-02 | 2.81e-02 | 1.49e-01 | 2  | <i>MAMSTR; MYOG</i>                                                                                                                             | 1  | <i>EDN1</i>                                                                                        | 2/210  | 1/210  | 3/210  |
| GO:1903038 | negative regulation of leukocyte cell-cell adhesion            | 3  | 210 | 12/3649  | 2.81e-02 | 2.81e-02 | 1.49e-01 | 3  | <i>IRF1; NOS3; ZC3H12A</i>                                                                                                                      | 0  | 0                                                                                                  | 3/210  | 0/210  | 3/210  |
| GO:2001021 | negative regulation of response to DNA damage stimulus         | 3  | 210 | 12/3649  | 2.81e-02 | 2.81e-02 | 1.49e-01 | 2  | <i>CGAS; SNAI2</i>                                                                                                                              | 1  | <i>RNF169</i>                                                                                      | 2/210  | 1/210  | 3/210  |
| GO:0040008 | regulation of growth                                           | 11 | 210 | 101/3649 | 2.90e-02 | 2.90e-02 | 1.52e-01 | 10 | <i>CXCL16; FLCN; FRZB; GALT; GJA1; IGFBP5; MSTN; MYOD1; TGFB1; TGFB2</i>                                                                        | 1  | <i>EDN1</i>                                                                                        | 10/210 | 1/210  | 11/210 |
| GO:1902531 | regulation of intracellular signal transduction                | 24 | 210 | 280/3649 | 2.91e-02 | 2.91e-02 | 1.52e-01 | 15 | <i>CD40; FLCN; GJA1; GRINA; IGFBP5; MSTN; PAK1; RASA3; RELL2; SNAI2; SPRY4; TGFB1; TGFB2; TMEM100; ZC3H12A</i>                                  | 9  | <i>CYLD; EDN1; FGF1; HCRTR1; HSPB1; MAP2K6; MYOZ2; RAPGEF2; RNF34</i>                              | 15/210 | 9/210  | 24/210 |

|            |                                                                                                                           |    |     |          |          |          |          |    |                                                                                  |   |                                                        |        |       |        |
|------------|---------------------------------------------------------------------------------------------------------------------------|----|-----|----------|----------|----------|----------|----|----------------------------------------------------------------------------------|---|--------------------------------------------------------|--------|-------|--------|
| GO:0097190 | apoptotic signaling pathway                                                                                               | 12 | 210 | 114/3649 | 2.93e-02 | 2.93e-02 | 1.52e-01 | 9  | <i>FLCN; GRINA; IFI6; NOS3; NR4A2; SHISA5; SNAI2; TGFB1; TGFB2</i>               | 3 | <i>BCL2; HSPB1; RNF34</i>                              | 9/210  | 3/210 | 12/210 |
| GO:0000018 | regulation of DNA recombination                                                                                           | 4  | 210 | 21/3649  | 2.95e-02 | 2.95e-02 | 1.52e-01 | 3  | <i>ACTB; CGAS; TGFB1</i>                                                         | 1 | <i>RBBP8</i>                                           | 3/210  | 1/210 | 4/210  |
| GO:0009755 | hormone-mediated signaling pathway                                                                                        | 4  | 210 | 21/3649  | 2.95e-02 | 2.95e-02 | 1.52e-01 | 4  | <i>HEYL; PAK1; RBFOX2; RXRG</i>                                                  | 0 | 0                                                      | 4/210  | 0/210 | 4/210  |
| GO:0019722 | calcium-mediated signaling                                                                                                | 4  | 210 | 21/3649  | 2.95e-02 | 2.95e-02 | 1.52e-01 | 2  | <i>EDNRB; TMEM100</i>                                                            | 2 | <i>EDN1; MYO22</i>                                     | 2/210  | 2/210 | 4/210  |
| GO:0022408 | negative regulation of cell-cell adhesion                                                                                 | 4  | 210 | 21/3649  | 2.95e-02 | 2.95e-02 | 1.52e-01 | 4  | <i>IRF1; NOS3; TGFB1; ZC3H12A</i>                                                | 0 | 0                                                      | 4/210  | 0/210 | 4/210  |
| GO:0032481 | positive regulation of type I interferon production                                                                       | 4  | 210 | 21/3649  | 2.95e-02 | 2.95e-02 | 1.52e-01 | 4  | <i>CGAS; IRF1; ISG15; OAS2</i>                                                   | 0 | 0                                                      | 4/210  | 0/210 | 4/210  |
| GO:0072009 | nephron epithelium development                                                                                            | 4  | 210 | 21/3649  | 2.95e-02 | 2.95e-02 | 1.52e-01 | 2  | <i>EDNRB; HEYL</i>                                                               | 2 | <i>EDNRA; FGF1</i>                                     | 2/210  | 2/210 | 4/210  |
| GO:0031098 | stress-activated protein kinase signaling cascade                                                                         | 5  | 210 | 31/3649  | 3.00e-02 | 3.00e-02 | 1.54e-01 | 3  | <i>RELL2; TGFB2; ZC3H12A</i>                                                     | 2 | <i>CYLD; MAP2K6</i>                                    | 3/210  | 2/210 | 5/210  |
| GO:0045598 | regulation of fat cell differentiation                                                                                    | 5  | 210 | 31/3649  | 3.00e-02 | 3.00e-02 | 1.54e-01 | 4  | <i>FLCN; FRZB; TGFB1; ZC3H12A</i>                                                | 1 | <i>NAPEPLD</i>                                         | 4/210  | 1/210 | 5/210  |
| GO:0050920 | regulation of chemotaxis                                                                                                  | 5  | 210 | 31/3649  | 3.00e-02 | 3.00e-02 | 1.54e-01 | 3  | <i>ANGPT2; MSTN; TGFB1</i>                                                       | 2 | <i>FGF1; HSPB1</i>                                     | 3/210  | 2/210 | 5/210  |
| GO:0043085 | positive regulation of catalytic activity                                                                                 | 16 | 210 | 168/3649 | 3.03e-02 | 3.03e-02 | 1.55e-01 | 9  | <i>CCND1; CD40; MOB3C; NOS3; NR4A2; PAK1; RGS10; TGFB1; TGFB2</i>                | 7 | <i>CAB39; CKS2; EDN1; FGF1; IFT57; MAP2K6; RAPGEF2</i> | 9/210  | 7/210 | 16/210 |
| GO:0002460 | adaptive immune response based on somatic recombination of immune receptors built from immunoglobulin superfamily domains | 6  | 210 | 42/3649  | 3.12e-02 | 3.12e-02 | 1.58e-01 | 5  | <i>C4A; CD40; NFKBIZ; TGFB1; ZC3H12A</i>                                         | 1 | <i>RNF168</i>                                          | 5/210  | 1/210 | 6/210  |
| GO:0034329 | cell junction assembly                                                                                                    | 6  | 210 | 42/3649  | 3.12e-02 | 3.12e-02 | 1.58e-01 | 5  | <i>ACTB; ACTG1; FLCN; LRRN1; SNAI2</i>                                           | 1 | <i>RAPGEF2</i>                                         | 5/210  | 1/210 | 6/210  |
| GO:0001817 | regulation of cytokine production                                                                                         | 12 | 210 | 116/3649 | 3.30e-02 | 3.30e-02 | 1.65e-01 | 11 | <i>CD14; CGAS; INHBB; IRF1; ISG15; ITGB6; OAS2; SNAI2; TGFB1; TGFB2; ZC3H12A</i> | 1 | <i>HSPB1</i>                                           | 11/210 | 1/210 | 12/210 |
| GO:0030036 | actin cytoskeleton organization                                                                                           | 12 | 210 | 116/3649 | 3.30e-02 | 3.30e-02 | 1.65e-01 | 6  | <i>ACTB; ACTG1; CNN2; PAK1; SCIN; VASP</i>                                       | 6 | <i>CSRP3; DSTN; EDN1; MICAL3; MYO22; ROCK2</i>         | 6/210  | 6/210 | 12/210 |
| GO:0019221 | cytokine-mediated signaling pathway                                                                                       | 8  | 210 | 66/3649  | 3.39e-02 | 3.39e-02 | 1.65e-01 | 5  | <i>CD44; IRF1; ISG15; MX1; OAS2</i>                                              | 3 | <i>CCRL2; CYLD; EDN1</i>                               | 5/210  | 3/210 | 8/210  |
| GO:0002285 | lymphocyte activation involved in immune response                                                                         | 5  | 210 | 32/3649  | 3.40e-02 | 3.40e-02 | 1.65e-01 | 4  | <i>LFNG; NFKBIZ; TGFB1; ZC3H12A</i>                                              | 1 | <i>RNF168</i>                                          | 4/210  | 1/210 | 5/210  |
| GO:0006937 | regulation of muscle contraction                                                                                          | 5  | 210 | 32/3649  | 3.40e-02 | 3.40e-02 | 1.65e-01 | 3  | <i>ORMDL3; TNNT2; ZC3H12A</i>                                                    | 2 | <i>EDN1; KCNMA1</i>                                    | 3/210  | 2/210 | 5/210  |
| GO:0051321 | meiotic cell cycle                                                                                                        | 5  | 210 | 32/3649  | 3.40e-02 | 3.40e-02 | 1.65e-01 | 1  | <i>PGRMC1</i>                                                                    | 4 | <i>CKS2; EDN1; EDNRA; RBBP8</i>                        | 1/210  | 4/210 | 5/210  |
| GO:0055067 | monovalent inorganic cation homeostasis                                                                                   | 5  | 210 | 32/3649  | 3.40e-02 | 3.40e-02 | 1.65e-01 | 1  | <i>EDNRB</i>                                                                     | 4 | <i>BCL2; EDN1; EDNRA; KCNMA1</i>                       | 1/210  | 4/210 | 5/210  |
| GO:0097191 | extrinsic apoptotic signaling pathway                                                                                     | 5  | 210 | 32/3649  | 3.40e-02 | 3.40e-02 | 1.65e-01 | 4  | <i>IFI6; NOS3; TGFB1; TGFB2</i>                                                  | 1 | <i>RNF34</i>                                           | 4/210  | 1/210 | 5/210  |
| GO:0010595 | positive regulation of endothelial cell migration                                                                         | 4  | 210 | 22/3649  | 3.44e-02 | 3.44e-02 | 1.65e-01 | 2  | <i>TGFB1; ZC3H12A</i>                                                            | 2 | <i>FGF1; HSPB1</i>                                     | 2/210  | 2/210 | 4/210  |
| GO:1901888 | regulation of cell junction assembly                                                                                      | 4  | 210 | 22/3649  | 3.44e-02 | 3.44e-02 | 1.65e-01 | 3  | <i>ACTG1; LRRN1; SNAI2</i>                                                       | 1 | <i>RAPGEF2</i>                                         | 3/210  | 1/210 | 4/210  |
| GO:1903046 | meiotic cell cycle process                                                                                                | 4  | 210 | 22/3649  | 3.44e-02 | 3.44e-02 | 1.65e-01 | 1  | <i>PGRMC1</i>                                                                    | 3 | <i>CKS2; EDN1; EDNRA</i>                               | 1/210  | 3/210 | 4/210  |
| GO:2000779 | regulation of double-strand break repair                                                                                  | 4  | 210 | 22/3649  | 3.44e-02 | 3.44e-02 | 1.65e-01 | 2  | <i>ACTB; CGAS</i>                                                                | 2 | <i>RBBP8; RNF169</i>                                   | 2/210  | 2/210 | 4/210  |

|            |                                                                  |    |     |          |          |          |          |    |                                                                                                                                                                                |   |                                                         |        |       |        |
|------------|------------------------------------------------------------------|----|-----|----------|----------|----------|----------|----|--------------------------------------------------------------------------------------------------------------------------------------------------------------------------------|---|---------------------------------------------------------|--------|-------|--------|
| GO:0009152 | purine ribonucleotide biosynthetic process                       | 6  | 210 | 43/3649  | 3.46e-02 | 3.46e-02 | 1.65e-01 | 6  | ADSS1; ELOVL5; ELOVL7; FLCN; NPPC; TGFB1                                                                                                                                       | 0 | 0                                                       | 6/210  | 0/210 | 6/210  |
| GO:0001570 | vasculogenesis                                                   | 3  | 210 | 13/3649  | 3.50e-02 | 3.50e-02 | 1.65e-01 | 1  | TMEM100                                                                                                                                                                        | 2 | CITED2; RAPGEF2                                         | 1/210  | 2/210 | 3/210  |
| GO:0002698 | negative regulation of immune effector process                   | 3  | 210 | 13/3649  | 3.50e-02 | 3.50e-02 | 1.65e-01 | 3  | TGFB1; TGFB2; ZC3H12A                                                                                                                                                          | 0 | 0                                                       | 3/210  | 0/210 | 3/210  |
| GO:0003231 | cardiac ventricle development                                    | 3  | 210 | 13/3649  | 3.50e-02 | 3.50e-02 | 1.65e-01 | 1  | HEYL                                                                                                                                                                           | 2 | CITED2; EDNRA                                           | 1/210  | 2/210 | 3/210  |
| GO:0032609 | interferon-gamma production                                      | 3  | 210 | 13/3649  | 3.50e-02 | 3.50e-02 | 1.65e-01 | 3  | CD14; ISG15; ZC3H12A                                                                                                                                                           | 0 | 0                                                       | 3/210  | 0/210 | 3/210  |
| GO:0032649 | regulation of interferon-gamma production                        | 3  | 210 | 13/3649  | 3.50e-02 | 3.50e-02 | 1.65e-01 | 3  | CD14; ISG15; ZC3H12A                                                                                                                                                           | 0 | 0                                                       | 3/210  | 0/210 | 3/210  |
| GO:0032728 | positive regulation of interferon-beta production                | 3  | 210 | 13/3649  | 3.50e-02 | 3.50e-02 | 1.65e-01 | 3  | IRF1; ISG15; OAS2                                                                                                                                                              | 0 | 0                                                       | 3/210  | 0/210 | 3/210  |
| GO:0033627 | cell adhesion mediated by integrin                               | 3  | 210 | 13/3649  | 3.50e-02 | 3.50e-02 | 1.65e-01 | 3  | ITGB6; SNAI2; TGFB2                                                                                                                                                            | 0 | 0                                                       | 3/210  | 0/210 | 3/210  |
| GO:0045911 | positive regulation of DNA recombination                         | 3  | 210 | 13/3649  | 3.50e-02 | 3.50e-02 | 1.65e-01 | 2  | ACTB; TGFB1                                                                                                                                                                    | 1 | RBBP8                                                   | 2/210  | 1/210 | 3/210  |
| GO:0048477 | oogenesis                                                        | 3  | 210 | 13/3649  | 3.50e-02 | 3.50e-02 | 1.65e-01 | 1  | PGRMC1                                                                                                                                                                         | 2 | EDN1; EDNRA                                             | 1/210  | 2/210 | 3/210  |
| GO:0071772 | response to BMP                                                  | 3  | 210 | 13/3649  | 3.50e-02 | 3.50e-02 | 1.65e-01 | 2  | HEYL; TMEM100                                                                                                                                                                  | 1 | ACVR2A                                                  | 2/210  | 1/210 | 3/210  |
| GO:0071773 | cellular response to BMP stimulus                                | 3  | 210 | 13/3649  | 3.50e-02 | 3.50e-02 | 1.65e-01 | 2  | HEYL; TMEM100                                                                                                                                                                  | 1 | ACVR2A                                                  | 2/210  | 1/210 | 3/210  |
| GO:0009615 | response to virus                                                | 9  | 210 | 79/3649  | 3.59e-02 | 3.59e-02 | 1.69e-01 | 8  | CGAS; IFI6; IRF1; ISG15; MX1; MX2; OAS2; ZC3H12A                                                                                                                               | 1 | HSPB1                                                   | 8/210  | 1/210 | 9/210  |
| GO:0090130 | tissue migration                                                 | 8  | 210 | 67/3649  | 3.67e-02 | 3.67e-02 | 1.72e-01 | 5  | ANGPT2; NR4A1; TGFB1; TGFB2; ZC3H12A                                                                                                                                           | 3 | FGF1; GLUL; HSPB1                                       | 5/210  | 3/210 | 8/210  |
| GO:0001816 | cytokine production                                              | 12 | 210 | 118/3649 | 3.70e-02 | 3.70e-02 | 1.73e-01 | 11 | CD14; CGAS; INHBB; IRF1; ISG15; ITGB6; OAS2; SNAI2; TGFB1; TGFB2; ZC3H12A                                                                                                      | 1 | HSPB1                                                   | 11/210 | 1/210 | 12/210 |
| GO:0040007 | growth                                                           | 14 | 210 | 145/3649 | 3.74e-02 | 3.74e-02 | 1.75e-01 | 11 | CXCL16; FLCN; FRZB; GALT; GJA1; IGFBP5; MSTN; MYOD1; NPPC; TGFB1; TGFB2                                                                                                        | 3 | EDN1; EDNRA; FGF1                                       | 11/210 | 3/210 | 14/210 |
| GO:0015711 | organic anion transport                                          | 6  | 210 | 44/3649  | 3.82e-02 | 3.82e-02 | 1.76e-01 | 3  | GJA1; SLC25A25; SLC25A29                                                                                                                                                       | 3 | ABCC1; SLC35D1; SLC43A2                                 | 3/210  | 3/210 | 6/210  |
| GO:0007219 | Notch signaling pathway                                          | 5  | 210 | 33/3649  | 3.83e-02 | 3.83e-02 | 1.76e-01 | 4  | HEYL; LFNG; SNAI2; TMEM100                                                                                                                                                     | 1 | WDR12                                                   | 4/210  | 1/210 | 5/210  |
| GO:0043433 | negative regulation of DNA-binding transcription factor activity | 5  | 210 | 33/3649  | 3.83e-02 | 3.83e-02 | 1.76e-01 | 4  | BHLHE40; HEYL; ID3; ZC3H12A                                                                                                                                                    | 1 | CYLD                                                    | 4/210  | 1/210 | 5/210  |
| GO:0060070 | canonical Wnt signaling pathway                                  | 5  | 210 | 33/3649  | 3.83e-02 | 3.83e-02 | 1.76e-01 | 2  | EDNRB; SNAI2                                                                                                                                                                   | 3 | CYLD; EDN1; EDNRA                                       | 2/210  | 3/210 | 5/210  |
| GO:0009628 | response to abiotic stimulus                                     | 17 | 210 | 187/3649 | 3.85e-02 | 3.85e-02 | 1.77e-01 | 9  | BHLHE40; CCND1; CD40; CNN2; GJA1; GNAT1; GPR4; MYOG; NR4A2                                                                                                                     | 8 | CITED2; CSRP3; EDN1; EDNRA; FGF1; KCNMA1; RNF168; RNF34 | 9/210  | 8/210 | 17/210 |
| GO:0002376 | immune system process                                            | 32 | 210 | 408/3649 | 3.93e-02 | 3.93e-02 | 1.80e-01 | 27 | ACTG1; C4A; CD14; CD40; CGAS; CNN2; CXCL16; EDNRB; ETV6; FLCN; GJA1; HMGB3; IFI6; IRF1; ISG15; LFNG; LGALS9; MSTN; MX1; MX2; NFKB1Z; OAS2; SCIN; SH2D1A; TGFB1; TGFB2; ZC3H12A | 5 | ACVR2A; CITED2; CYLD; MAPKAPK3; RNF168                  | 27/210 | 5/210 | 32/210 |
| GO:0003014 | renal system process                                             | 4  | 210 | 23/3649  | 3.98e-02 | 3.98e-02 | 1.80e-01 | 1  | EDNRB                                                                                                                                                                          | 3 | EDN1; EDNRA; KCNMA1                                     | 1/210  | 3/210 | 4/210  |
| GO:0043500 | muscle adaptation                                                | 4  | 210 | 23/3649  | 3.98e-02 | 3.98e-02 | 1.80e-01 | 2  | IGFBP5; MYOG                                                                                                                                                                   | 2 | EDN1; MYO22                                             | 2/210  | 2/210 | 4/210  |
| GO:0051781 | positive regulation of cell division                             | 4  | 210 | 23/3649  | 3.98e-02 | 3.98e-02 | 1.80e-01 | 2  | TGFB1; TGFB2                                                                                                                                                                   | 2 | FGF1; MAP10                                             | 2/210  | 2/210 | 4/210  |

|            |                                                      |    |     |          |          |          |          |    |                                                                                                                                    |   |                                                   |        |       |        |
|------------|------------------------------------------------------|----|-----|----------|----------|----------|----------|----|------------------------------------------------------------------------------------------------------------------------------------|---|---------------------------------------------------|--------|-------|--------|
| GO:1990845 | adaptive thermogenesis                               | 4  | 210 | 23/3649  | 3.98e-02 | 3.98e-02 | 1.80e-01 | 3  | <i>FLCN; GJA1; OXTR</i>                                                                                                            | 1 | <i>MAP2K6</i>                                     | 3/210  | 1/210 | 4/210  |
| GO:2000241 | regulation of reproductive process                   | 4  | 210 | 23/3649  | 3.98e-02 | 3.98e-02 | 1.80e-01 | 3  | <i>GJA1; INHBB; PLAT</i>                                                                                                           | 1 | <i>CITED2</i>                                     | 3/210  | 1/210 | 4/210  |
| GO:0034330 | cell junction organization                           | 9  | 210 | 81/3649  | 4.13e-02 | 4.13e-02 | 1.85e-01 | 8  | <i>ACTB; ACTG1; FLCN; GJA1; LRRN1; SNAI2; TGFB1; TGFB2</i>                                                                         | 1 | <i>RAPGEF2</i>                                    | 8/210  | 1/210 | 9/210  |
| GO:0043066 | negative regulation of apoptotic process             | 14 | 210 | 147/3649 | 4.13e-02 | 4.13e-02 | 1.85e-01 | 8  | <i>GRINA; IFI6; NOS3; NR4A1; NR4A2; ORMDL3; SNAI2; ZC3H12A</i>                                                                     | 6 | <i>BCL2; CITED2; CRYAB; HSPB1; RNF144B; RNF34</i> | 8/210  | 6/210 | 14/210 |
| GO:0045087 | innate immune response                               | 14 | 210 | 147/3649 | 4.13e-02 | 4.13e-02 | 1.85e-01 | 13 | <i>ACTG1; C4A; CD14; CGAS; CXCL16; HMGB3; IFI6; IRF1; ISG15; MX1; MX2; OAS2; SH2D1A</i>                                            | 1 | <i>CYLD</i>                                       | 13/210 | 1/210 | 14/210 |
| GO:0060562 | epithelial tube morphogenesis                        | 6  | 210 | 45/3649  | 4.21e-02 | 4.21e-02 | 1.85e-01 | 2  | <i>GJA1; PAK1</i>                                                                                                                  | 4 | <i>CITED2; EDN1; EDNRA; FGF1</i>                  | 2/210  | 4/210 | 6/210  |
| GO:0001885 | endothelial cell development                         | 3  | 210 | 14/3649  | 4.27e-02 | 4.27e-02 | 1.85e-01 | 1  | <i>EDNRB</i>                                                                                                                       | 2 | <i>EDNRA; RAPGEF2</i>                             | 1/210  | 2/210 | 3/210  |
| GO:0002312 | B cell activation involved in immune response        | 3  | 210 | 14/3649  | 4.27e-02 | 4.27e-02 | 1.85e-01 | 2  | <i>LFNG; TGFB1</i>                                                                                                                 | 1 | <i>RNF168</i>                                     | 2/210  | 1/210 | 3/210  |
| GO:0014896 | muscle hypertrophy                                   | 3  | 210 | 14/3649  | 4.27e-02 | 4.27e-02 | 1.85e-01 | 1  | <i>IGFBP5</i>                                                                                                                      | 2 | <i>CSRP3; EDN1</i>                                | 1/210  | 2/210 | 3/210  |
| GO:0014897 | striated muscle hypertrophy                          | 3  | 210 | 14/3649  | 4.27e-02 | 4.27e-02 | 1.85e-01 | 1  | <i>IGFBP5</i>                                                                                                                      | 2 | <i>CSRP3; EDN1</i>                                | 1/210  | 2/210 | 3/210  |
| GO:0032608 | interferon-beta production                           | 3  | 210 | 14/3649  | 4.27e-02 | 4.27e-02 | 1.85e-01 | 3  | <i>IRF1; ISG15; OAS2</i>                                                                                                           | 0 | <i>0</i>                                          | 3/210  | 0/210 | 3/210  |
| GO:0032648 | regulation of interferon-beta production             | 3  | 210 | 14/3649  | 4.27e-02 | 4.27e-02 | 1.85e-01 | 3  | <i>IRF1; ISG15; OAS2</i>                                                                                                           | 0 | <i>0</i>                                          | 3/210  | 0/210 | 3/210  |
| GO:0032874 | positive regulation of stress-activated MAPK cascade | 3  | 210 | 14/3649  | 4.27e-02 | 4.27e-02 | 1.85e-01 | 3  | <i>RELL2; TGFB2; ZC3H12A</i>                                                                                                       | 0 | <i>0</i>                                          | 3/210  | 0/210 | 3/210  |
| GO:0042310 | vasoconstriction                                     | 3  | 210 | 14/3649  | 4.27e-02 | 4.27e-02 | 1.85e-01 | 1  | <i>EDNRB</i>                                                                                                                       | 2 | <i>EDN1; EDNRA</i>                                | 1/210  | 2/210 | 3/210  |
| GO:0046209 | nitric oxide metabolic process                       | 3  | 210 | 14/3649  | 4.27e-02 | 4.27e-02 | 1.85e-01 | 3  | <i>DDAH2; NOS3; ZC3H12A</i>                                                                                                        | 0 | <i>0</i>                                          | 3/210  | 0/210 | 3/210  |
| GO:0046634 | regulation of alpha-beta T cell activation           | 3  | 210 | 14/3649  | 4.27e-02 | 4.27e-02 | 1.85e-01 | 3  | <i>IRF1; NFKBIZ; ZC3H12A</i>                                                                                                       | 0 | <i>0</i>                                          | 3/210  | 0/210 | 3/210  |
| GO:0061005 | cell differentiation involved in kidney development  | 3  | 210 | 14/3649  | 4.27e-02 | 4.27e-02 | 1.85e-01 | 2  | <i>EDNRB; GPR4</i>                                                                                                                 | 1 | <i>EDNRA</i>                                      | 2/210  | 1/210 | 3/210  |
| GO:1990868 | response to chemokine                                | 3  | 210 | 14/3649  | 4.27e-02 | 4.27e-02 | 1.85e-01 | 1  | <i>ZC3H12A</i>                                                                                                                     | 2 | <i>CCRL2; EDN1</i>                                | 1/210  | 2/210 | 3/210  |
| GO:1990869 | cellular response to chemokine                       | 3  | 210 | 14/3649  | 4.27e-02 | 4.27e-02 | 1.85e-01 | 1  | <i>ZC3H12A</i>                                                                                                                     | 2 | <i>CCRL2; EDN1</i>                                | 1/210  | 2/210 | 3/210  |
| GO:0046890 | regulation of lipid biosynthetic process             | 5  | 210 | 34/3649  | 4.28e-02 | 4.28e-02 | 1.85e-01 | 3  | <i>ASAH1; ELOVL5; SNAI2</i>                                                                                                        | 2 | <i>FGF1; FITM2</i>                                | 3/210  | 2/210 | 5/210  |
| GO:0006955 | immune response                                      | 22 | 210 | 262/3649 | 4.38e-02 | 4.38e-02 | 1.88e-01 | 19 | <i>ACTG1; C4A; CD14; CD40; CGAS; CXCL16; HMGB3; IFI6; IRF1; ISG15; LFNG; MX1; MX2; NFKBIZ; OAS2; SH2D1A; TGFB1; TGFB2; ZC3H12A</i> | 3 | <i>CYLD; MAPKAPK3; RNF168</i>                     | 19/210 | 3/210 | 22/210 |
| GO:0006935 | chemotaxis                                           | 9  | 210 | 82/3649  | 4.41e-02 | 4.41e-02 | 1.89e-01 | 5  | <i>ANGPT2; EDNRB; MSTN; NR4A1; TGFB1</i>                                                                                           | 4 | <i>EDN1; EDNRA; FGF1; HSPB1</i>                   | 5/210  | 4/210 | 9/210  |
| GO:0042330 | taxis                                                | 9  | 210 | 82/3649  | 4.41e-02 | 4.41e-02 | 1.89e-01 | 5  | <i>ANGPT2; EDNRB; MSTN; NR4A1; TGFB1</i>                                                                                           | 4 | <i>EDN1; EDNRA; FGF1; HSPB1</i>                   | 5/210  | 4/210 | 9/210  |
| GO:0032479 | regulation of type I interferon production           | 4  | 210 | 24/3649  | 4.57e-02 | 4.57e-02 | 1.94e-01 | 4  | <i>CGAS; IRF1; ISG15; OAS2</i>                                                                                                     | 0 | <i>0</i>                                          | 4/210  | 0/210 | 4/210  |
| GO:0032606 | type I interferon production                         | 4  | 210 | 24/3649  | 4.57e-02 | 4.57e-02 | 1.94e-01 | 4  | <i>CGAS; IRF1; ISG15; OAS2</i>                                                                                                     | 0 | <i>0</i>                                          | 4/210  | 0/210 | 4/210  |
| GO:0048754 | branching morphogenesis of an epithelial tube        | 4  | 210 | 24/3649  | 4.57e-02 | 4.57e-02 | 1.94e-01 | 1  | <i>PAK1</i>                                                                                                                        | 3 | <i>EDN1; EDNRA; FGF1</i>                          | 1/210  | 3/210 | 4/210  |
| GO:0072073 | kidney epithelium development                        | 4  | 210 | 24/3649  | 4.57e-02 | 4.57e-02 | 1.94e-01 | 2  | <i>EDNRB; HEYL</i>                                                                                                                 | 2 | <i>EDNRA; FGF1</i>                                | 2/210  | 2/210 | 4/210  |
| GO:0007249 | I-kappaB kinase/NF-kappaB signaling                  | 6  | 210 | 46/3649  | 4.62e-02 | 4.62e-02 | 1.95e-01 | 3  | <i>EDNRB; GJA1; ZC3H12A</i>                                                                                                        | 3 | <i>EDN1; EDNRA; HSPB1</i>                         | 3/210  | 3/210 | 6/210  |
| GO:0042391 | regulation of membrane potential                     | 6  | 210 | 46/3649  | 4.62e-02 | 4.62e-02 | 1.95e-01 | 4  | <i>CHRNE; CHRNG; GJA1; IFI6</i>                                                                                                    | 2 | <i>BCL2; KCNMA1</i>                               | 4/210  | 2/210 | 6/210  |

|            |                                                                         |    |     |          |          |          |          |    |                                                                                                       |    |                                                                                                           |        |        |        |
|------------|-------------------------------------------------------------------------|----|-----|----------|----------|----------|----------|----|-------------------------------------------------------------------------------------------------------|----|-----------------------------------------------------------------------------------------------------------|--------|--------|--------|
| GO:1905114 | cell surface receptor signaling pathway involved in cell-cell signaling | 9  | 210 | 83/3649  | 4.71e-02 | 4.71e-02 | 1.98e-01 | 5  | <i>CHRNE; CHRNG; EDNRB; FRZB; SNAI2</i>                                                               | 4  | <i>ARL6; CYLD; EDN1; EDNRA</i>                                                                            | 5/210  | 4/210  | 9/210  |
| GO:0033554 | cellular response to stress                                             | 29 | 210 | 370/3649 | 4.91e-02 | 4.91e-02 | 2.06e-01 | 14 | <i>ACTB; CCND1; CGAS; FLCN; GRINA; INHBB; NOS3; NR4A2; PAK1; RELL2; SHISA5; SNAI2; TGFB2; ZC3H12A</i> | 15 | <i>CITED2; CYLD; EDN1; EDNRA; ERCC6L2; FGF1; HSPB1; MAP2K6; PRMT6; RBBP8; RNF168; RNF34; SHLD1; USP13</i> | 14/210 | 15/210 | 29/210 |
| GO:0051046 | regulation of secretion                                                 | 8  | 210 | 71/3649  | 4.92e-02 | 4.92e-02 | 2.06e-01 | 7  | <i>GJA1; INHBB; OAS2; RHBDF1; SCIN; TGFB1; TGFB2</i>                                                  | 1  | <i>EDN1</i>                                                                                               | 7/210  | 1/210  | 8/210  |
| GO:0010243 | response to organonitrogen compound                                     | 13 | 210 | 137/3649 | 4.95e-02 | 4.95e-02 | 2.06e-01 | 8  | <i>ACTB; GJA1; IGFBP5; INHBB; MSTN; NR4A1; NR4A2; NSG2</i>                                            | 5  | <i>CSRP3; EDN1; EDNRA; RAPGEF2; USP13</i>                                                                 | 8/210  | 5/210  | 13/210 |

---

#### 4. Enriched Biological Process of Gene Ontology terms to DEG prospect in T2 vs T1 into early weaning group

| ID         | Description                                  | count | terms | BgRatio  | pvalue   | p.adjust | qvalue   | Count.UpReg | geneID.UpReg                                                                                                                         | Count.DownReg | geneID.DownReg                                                                                                   | GeneRatio.Up | GeneRatio.Down | GeneRatio |
|------------|----------------------------------------------|-------|-------|----------|----------|----------|----------|-------------|--------------------------------------------------------------------------------------------------------------------------------------|---------------|------------------------------------------------------------------------------------------------------------------|--------------|----------------|-----------|
| GO:0006631 | fatty acid metabolic process                 | 19    | 178   | 95/3649  | 8.09e-08 | 8.09e-08 | 1.33e-04 | 9           | ACACA; ACSM1; ADIPOQ; FABP4; FADS2; FASN; HSD17B12; PRKAG3; SCD                                                                      | 10            | ACADM; ACADVL; ACAT1; BRCA1; CPT1B; CPT2; PLIN5; PRL; SLC27A1; UCP3                                              | 9/178        | 10/178         | 19/178    |
| GO:0044255 | cellular lipid metabolic process             | 30    | 178   | 233/3649 | 4.82e-07 | 4.82e-07 | 3.95e-04 | 15          | ACACA; ACSM1; ADIPOQ; FABP4; FADS2; FASN; FGF2; HSD17B12; LSS; ORMDL3; PMVK; PRKAG3; SCD; SPTSSA; ST3GAL6                            | 15            | ACADM; ACADVL; ACAT1; AGTR1; BRCA1; CASZ1; CPT1B; CPT2; FITM2; NCEH1; PLA2G7; PLIN5; PRL; SLC27A1; UCP3          | 15/178       | 15/178         | 30/178    |
| GO:0006629 | lipid metabolic process                      | 35    | 178   | 325/3649 | 3.69e-06 | 3.69e-06 | 2.02e-03 | 19          | ACACA; ACSM1; ADIPOQ; BDH1; CYP51A1; FABP4; FADS2; FAH; FASN; FGF2; HSD17B12; LSS; NR1D1; ORMDL3; PMVK; PRKAG3; SCD; SPTSSA; ST3GAL6 | 16            | ACADM; ACADVL; ACAT1; AGTR1; ANGPTL4; BRCA1; CASZ1; CPT1B; CPT2; FITM2; NCEH1; PLA2G7; PLIN5; PRL; SLC27A1; UCP3 | 19/178       | 16/178         | 35/178    |
| GO:0044283 | small molecule biosynthetic process          | 21    | 178   | 149/3649 | 7.28e-06 | 7.28e-06 | 2.99e-03 | 15          | ACACA; ACSM1; ADIPOQ; CYP51A1; FADS2; FASN; FGF2; HSD17B12; LSS; NR1D1; PMVK; PRKAG3; PYCR1; SCD; SPTSSA                             | 6             | ACADM; ACADVL; BRCA1; FBP2; PRL; SLC39A14                                                                        | 15/178       | 6/178          | 21/178    |
| GO:0032787 | monocarboxylic acid metabolic process        | 20    | 178   | 142/3649 | 1.24e-05 | 1.24e-05 | 4.06e-03 | 10          | ACACA; ACSM1; ADIPOQ; FABP4; FADS2; FASN; HSD17B12; NR1D1; PRKAG3; SCD                                                               | 10            | ACADM; ACADVL; ACAT1; BRCA1; CPT1B; CPT2; PLIN5; PRL; SLC27A1; UCP3                                              | 10/178       | 10/178         | 20/178    |
| GO:0008610 | lipid biosynthetic process                   | 21    | 178   | 156/3649 | 1.52e-05 | 1.52e-05 | 4.14e-03 | 14          | ACACA; ACSM1; CYP51A1; FADS2; FASN; FGF2; HSD17B12; LSS; NR1D1; ORMDL3; PMVK; PRKAG3; SCD; SPTSSA                                    | 7             | ACADVL; ACAT1; BRCA1; FITM2; PLIN5; PRL; SLC27A1                                                                 | 14/178       | 7/178          | 21/178    |
| GO:0006635 | fatty acid beta-oxidation                    | 7     | 178   | 19/3649  | 1.79e-05 | 1.79e-05 | 4.19e-03 | 1           | ADIPOQ                                                                                                                               | 6             | ACADM; ACADVL; ACAT1; CPT1B; CPT2; PLIN5                                                                         | 1/178        | 6/178          | 7/178     |
| GO:0009062 | fatty acid catabolic process                 | 7     | 178   | 21/3649  | 3.80e-05 | 3.80e-05 | 6.53e-03 | 1           | ADIPOQ                                                                                                                               | 6             | ACADM; ACADVL; ACAT1; CPT1B; CPT2; PLIN5                                                                         | 1/178        | 6/178          | 7/178     |
| GO:0019752 | carboxylic acid metabolic process            | 26    | 178   | 232/3649 | 3.98e-05 | 3.98e-05 | 6.53e-03 | 14          | ACACA; ACSM1; ADIPOQ; DBT; DDAH2; FABP4; FADS2; FAH; FASN; HSD17B12; NR1D1; PRKAG3; PYCR1; SCD                                       | 12            | ACADM; ACADVL; ACAT1; BRCA1; CPT1B; CPT2; DDC; ODC1; PLIN5; PRL; SLC27A1; UCP3                                   | 14/178       | 12/178         | 26/178    |
| GO:0043436 | oxoacid metabolic process                    | 26    | 178   | 232/3649 | 3.98e-05 | 3.98e-05 | 6.53e-03 | 14          | ACACA; ACSM1; ADIPOQ; DBT; DDAH2; FABP4; FADS2; FAH; FASN; HSD17B12; NR1D1; PRKAG3; PYCR1; SCD                                       | 12            | ACADM; ACADVL; ACAT1; BRCA1; CPT1B; CPT2; DDC; ODC1; PLIN5; PRL; SLC27A1; UCP3                                   | 14/178       | 12/178         | 26/178    |
| GO:0006082 | organic acid metabolic process               | 26    | 178   | 234/3649 | 4.62e-05 | 4.62e-05 | 6.83e-03 | 14          | ACACA; ACSM1; ADIPOQ; DBT; DDAH2; FABP4; FADS2; FAH; FASN; HSD17B12; NR1D1; PRKAG3; PYCR1; SCD                                       | 12            | ACADM; ACADVL; ACAT1; BRCA1; CPT1B; CPT2; DDC; ODC1; PLIN5; PRL; SLC27A1; UCP3                                   | 14/178       | 12/178         | 26/178    |
| GO:0072330 | monocarboxylic acid biosynthetic process     | 11    | 178   | 55/3649  | 4.99e-05 | 4.99e-05 | 6.83e-03 | 8           | ACACA; ACSM1; FADS2; FASN; HSD17B12; NR1D1; PRKAG3; SCD                                                                              | 3             | ACADVL; BRCA1; PRL                                                                                               | 8/178        | 3/178          | 11/178    |
| GO:0030258 | lipid modification                           | 9     | 178   | 38/3649  | 6.10e-05 | 6.10e-05 | 7.70e-03 | 1           | ADIPOQ                                                                                                                               | 8             | ACADM; ACADVL; ACAT1; AGTR1; CASZ1; CPT1B; CPT2; PLIN5                                                           | 1/178        | 8/178          | 9/178     |
| GO:0006633 | fatty acid biosynthetic process              | 10    | 178   | 48/3649  | 7.69e-05 | 7.69e-05 | 9.02e-03 | 7           | ACACA; ACSM1; FADS2; FASN; HSD17B12; PRKAG3; SCD                                                                                     | 3             | ACADVL; BRCA1; PRL                                                                                               | 7/178        | 3/178          | 10/178    |
| GO:0033692 | cellular polysaccharide biosynthetic process | 5     | 178   | 11/3649  | 9.50e-05 | 9.50e-05 | 9.63e-03 | 3           | NR1D1; PPP1R3C; PRKAG3                                                                                                               | 2             | ACADM; UGP2                                                                                                      | 3/178        | 2/178          | 5/178     |
| GO:0019395 | fatty acid oxidation                         | 7     | 178   | 24/3649  | 9.98e-05 | 9.98e-05 | 9.63e-03 | 1           | ADIPOQ                                                                                                                               | 6             | ACADM; ACADVL; ACAT1; CPT1B; CPT2; PLIN5                                                                         | 1/178        | 6/178          | 7/178     |

|            |                                                         |    |     |          |          |          |          |    |                                                                                                                                               |    |                                                                                                                      |        |        |        |
|------------|---------------------------------------------------------|----|-----|----------|----------|----------|----------|----|-----------------------------------------------------------------------------------------------------------------------------------------------|----|----------------------------------------------------------------------------------------------------------------------|--------|--------|--------|
| GO:0072329 | monocarboxylic acid catabolic process                   | 7  | 178 | 24/3649  | 9.98e-05 | 9.98e-05 | 9.63e-03 | 1  | ADIPOQ                                                                                                                                        | 6  | ACADM; ACADVL; ACAT1; CPT1B; CPT2; PLIN5                                                                             | 1/178  | 6/178  | 7/178  |
| GO:0034440 | lipid oxidation                                         | 7  | 178 | 25/3649  | 1.33e-04 | 1.33e-04 | 1.21e-02 | 1  | ADIPOQ                                                                                                                                        | 6  | ACADM; ACADVL; ACAT1; CPT1B; CPT2; PLIN5                                                                             | 1/178  | 6/178  | 7/178  |
| GO:0000271 | polysaccharide biosynthetic process                     | 5  | 178 | 13/3649  | 2.44e-04 | 2.44e-04 | 2.11e-02 | 3  | NR1D1; PPP1R3C; PRKAG3                                                                                                                        | 2  | ACADM; UGP2                                                                                                          | 3/178  | 2/178  | 5/178  |
| GO:0016051 | carbohydrate biosynthetic process                       | 8  | 178 | 37/3649  | 3.13e-04 | 3.13e-04 | 2.57e-02 | 4  | ADIPOQ; NR1D1; PPP1R3C; PRKAG3                                                                                                                | 4  | ACADM; FBP2; SLC39A14; UGP2                                                                                          | 4/178  | 4/178  | 8/178  |
| GO:0016054 | organic acid catabolic process                          | 10 | 178 | 57/3649  | 3.46e-04 | 3.46e-04 | 2.58e-02 | 4  | ADIPOQ; DBT; DDAH2; FAH                                                                                                                       | 6  | ACADM; ACADVL; ACAT1; CPT1B; CPT2; PLIN5                                                                             | 4/178  | 6/178  | 10/178 |
| GO:0046395 | carboxylic acid catabolic process                       | 10 | 178 | 57/3649  | 3.46e-04 | 3.46e-04 | 2.58e-02 | 4  | ADIPOQ; DBT; DDAH2; FAH                                                                                                                       | 6  | ACADM; ACADVL; ACAT1; CPT1B; CPT2; PLIN5                                                                             | 4/178  | 6/178  | 10/178 |
| GO:0045834 | positive regulation of lipid metabolic process          | 7  | 178 | 30/3649  | 4.57e-04 | 4.57e-04 | 3.26e-02 | 3  | ADIPOQ; FGF2; NR1D1                                                                                                                           | 4  | AGTR1; PLIN5; PRL; SLC27A1                                                                                           | 3/178  | 4/178  | 7/178  |
| GO:0044281 | small molecule metabolic process                        | 38 | 178 | 458/3649 | 5.05e-04 | 5.05e-04 | 3.45e-02 | 21 | ACACA; ACSM1; ADIPOQ; CYP51A1; DBT; DDAH2; FABP4; FADS2; FAH; FASN; FGF2; HSD17B12; LSS; MTHFR; NR1D1; NT5E; PMVK; PRKAG3; PYCR1; SCD; SPTSSA | 17 | ACADM; ACADVL; ACAT1; BRCA1; CPT1B; CPT2; DDC; FBP2; FITM2; NCEH1; ODC1; PLA2G7; PLIN5; PRL; SLC27A1; SLC39A14; UCP3 | 21/178 | 17/178 | 38/178 |
| GO:0019216 | regulation of lipid metabolic process                   | 11 | 178 | 72/3649  | 6.10e-04 | 6.10e-04 | 3.94e-02 | 3  | ADIPOQ; FGF2; NR1D1                                                                                                                           | 8  | ACADVL; AGTR1; BRCA1; CASZ1; FITM2; PLIN5; PRL; SLC27A1                                                              | 3/178  | 8/178  | 11/178 |
| GO:0010565 | regulation of cellular ketone metabolic process         | 6  | 178 | 23/3649  | 6.24e-04 | 6.24e-04 | 3.94e-02 | 2  | ADIPOQ; NR1D1                                                                                                                                 | 4  | ACADVL; BRCA1; PLIN5; PRL                                                                                            | 2/178  | 4/178  | 6/178  |
| GO:0034637 | cellular carbohydrate biosynthetic process              | 5  | 178 | 16/3649  | 7.35e-04 | 7.35e-04 | 4.47e-02 | 3  | NR1D1; PPP1R3C; PRKAG3                                                                                                                        | 2  | ACADM; UGP2                                                                                                          | 3/178  | 2/178  | 5/178  |
| GO:0046394 | carboxylic acid biosynthetic process                    | 12 | 178 | 86/3649  | 8.05e-04 | 8.05e-04 | 4.72e-02 | 9  | ACACA; ACSM1; FADS2; FASN; HSD17B12; NR1D1; PRKAG3; PYCR1; SCD                                                                                | 3  | ACADVL; BRCA1; PRL                                                                                                   | 9/178  | 3/178  | 12/178 |
| GO:0016053 | organic acid biosynthetic process                       | 12 | 178 | 87/3649  | 8.95e-04 | 8.95e-04 | 4.99e-02 | 9  | ACACA; ACSM1; FADS2; FASN; HSD17B12; NR1D1; PRKAG3; PYCR1; SCD                                                                                | 3  | ACADVL; BRCA1; PRL                                                                                                   | 9/178  | 3/178  | 12/178 |
| GO:0055017 | cardiac muscle tissue growth                            | 4  | 178 | 10/3649  | 9.12e-04 | 9.12e-04 | 4.99e-02 | 4  | FGF2; MEF2C; PI16; TGFB2                                                                                                                      | 0  | 0                                                                                                                    | 4/178  | 0/178  | 4/178  |
| GO:0019217 | regulation of fatty acid metabolic process              | 5  | 178 | 17/3649  | 1.00e-03 | 1.00e-03 | 5.25e-02 | 1  | ADIPOQ                                                                                                                                        | 4  | ACADVL; BRCA1; PLIN5; PRL                                                                                            | 1/178  | 4/178  | 5/178  |
| GO:0046890 | regulation of lipid biosynthetic process                | 7  | 178 | 34/3649  | 1.02e-03 | 1.02e-03 | 5.25e-02 | 1  | NR1D1                                                                                                                                         | 6  | ACADVL; BRCA1; FITM2; PLIN5; PRL; SLC27A1                                                                            | 1/178  | 6/178  | 7/178  |
| GO:0060419 | heart growth                                            | 4  | 178 | 11/3649  | 1.38e-03 | 1.38e-03 | 6.86e-02 | 4  | FGF2; MEF2C; PI16; TGFB2                                                                                                                      | 0  | 0                                                                                                                    | 4/178  | 0/178  | 4/178  |
| GO:0044242 | cellular lipid catabolic process                        | 8  | 178 | 47/3649  | 1.68e-03 | 1.68e-03 | 7.50e-02 | 1  | ADIPOQ                                                                                                                                        | 7  | ACADM; ACADVL; ACAT1; CPT1B; CPT2; PLA2G7; PLIN5                                                                     | 1/178  | 7/178  | 8/178  |
| GO:0005977 | glycogen metabolic process                              | 5  | 178 | 19/3649  | 1.74e-03 | 1.74e-03 | 7.50e-02 | 3  | NR1D1; PPP1R3C; PRKAG3                                                                                                                        | 2  | ACADM; UGP2                                                                                                          | 3/178  | 2/178  | 5/178  |
| GO:0006073 | cellular glucan metabolic process                       | 5  | 178 | 19/3649  | 1.74e-03 | 1.74e-03 | 7.50e-02 | 3  | NR1D1; PPP1R3C; PRKAG3                                                                                                                        | 2  | ACADM; UGP2                                                                                                          | 3/178  | 2/178  | 5/178  |
| GO:0044042 | glucan metabolic process                                | 5  | 178 | 19/3649  | 1.74e-03 | 1.74e-03 | 7.50e-02 | 3  | NR1D1; PPP1R3C; PRKAG3                                                                                                                        | 2  | ACADM; UGP2                                                                                                          | 3/178  | 2/178  | 5/178  |
| GO:0071466 | cellular response to xenobiotic stimulus                | 5  | 178 | 19/3649  | 1.74e-03 | 1.74e-03 | 7.50e-02 | 3  | ADIPOQ; ANKRD1; MEF2C                                                                                                                         | 2  | MYC; NCEH1                                                                                                           | 3/178  | 2/178  | 5/178  |
| GO:0006112 | energy reserve metabolic process                        | 5  | 178 | 20/3649  | 2.22e-03 | 2.22e-03 | 9.36e-02 | 3  | NR1D1; PPP1R3C; PRKAG3                                                                                                                        | 2  | ACADM; UGP2                                                                                                          | 3/178  | 2/178  | 5/178  |
| GO:0048738 | cardiac muscle tissue development                       | 6  | 178 | 29/3649  | 2.30e-03 | 2.30e-03 | 9.43e-02 | 5  | ANKRD1; FGF2; MEF2C; PI16; TGFB2                                                                                                              | 1  | ACADM                                                                                                                | 5/178  | 1/178  | 6/178  |
| GO:0051241 | negative regulation of multicellular organismal process | 15 | 178 | 138/3649 | 2.58e-03 | 2.58e-03 | 1.03e-01 | 8  | ADIPOQ; FGF2; INHBB; MEF2C; NR1D1; PFN2; PI16; TGFB2                                                                                          | 7  | ASPEN; CDK5R1; GADD45A; HSP90AB1; LAPTM4B; MAP2K6; MYC                                                               | 8/178  | 7/178  | 15/178 |
| GO:0051403 | stress-activated MAPK cascade                           | 6  | 178 | 30/3649  | 2.76e-03 | 2.76e-03 | 1.05e-01 | 1  | TGFB2                                                                                                                                         | 5  | DNAJAI; GADD45A; IGF1R; MAP2K6; MYC                                                                                  | 1/178  | 5/178  | 6/178  |
| GO:0044264 | cellular polysaccharide metabolic process               | 5  | 178 | 21/3649  | 2.81e-03 | 2.81e-03 | 1.05e-01 | 3  | NR1D1; PPP1R3C; PRKAG3                                                                                                                        | 2  | ACADM; UGP2                                                                                                          | 3/178  | 2/178  | 5/178  |



|            |                                                                 |    |     |          |          |          |          |    |                                                                                             |   |                                                         |        |       |        |
|------------|-----------------------------------------------------------------|----|-----|----------|----------|----------|----------|----|---------------------------------------------------------------------------------------------|---|---------------------------------------------------------|--------|-------|--------|
| GO:2000278 | regulation of DNA biosynthetic process                          | 5  | 178 | 21/3649  | 2.81e-03 | 2.81e-03 | 1.05e-01 | 3  | ADIPOQ; ANKRD1; FGF2                                                                        | 2 | CCT3; MYC                                               | 3/178  | 2/178 | 5/178  |
| GO:0031098 | stress-activated protein kinase signaling cascade               | 6  | 178 | 31/3649  | 3.29e-03 | 3.29e-03 | 1.20e-01 | 1  | TGFB2                                                                                       | 5 | DNAJA1; GADD45A; IGF1R; MAP2K6; MYC                     | 1/178  | 5/178 | 6/178  |
| GO:0060191 | regulation of lipase activity                                   | 4  | 178 | 14/3649  | 3.73e-03 | 3.73e-03 | 1.33e-01 | 1  | FGF2                                                                                        | 3 | AGTR1; ANGPTL4; PLIN5                                   | 1/178  | 3/178 | 4/178  |
| GO:0043065 | positive regulation of apoptotic process                        | 11 | 178 | 91/3649  | 4.26e-03 | 4.26e-03 | 1.44e-01 | 6  | ADIPOQ; ANKRD1; CLU; MEF2C; MLLT11; TGFB2                                                   | 5 | CDK5R1; DNAJA1; GADD45A; MYC; SHQ1                      | 6/178  | 5/178 | 11/178 |
| GO:0005976 | polysaccharide metabolic process                                | 5  | 178 | 23/3649  | 4.29e-03 | 4.29e-03 | 1.44e-01 | 3  | NR1D1; PPP1R3C; PRKAG3                                                                      | 2 | ACADM; UGP2                                             | 3/178  | 2/178 | 5/178  |
| GO:0003008 | system process                                                  | 20 | 178 | 219/3649 | 4.30e-03 | 4.30e-03 | 1.44e-01 | 13 | ADIPOQ; CHRNA3; CHRNE; INHBB; LMCD1; LUM; MEF2C; NPR3; ORMDL3; PI16; PRKAG3; RETREG1; TGFB2 | 7 | ACTA2; AGTR1; MAP2K6; RIPOR2; SCN3B; SCN4B; TMEM120A    | 13/178 | 7/178 | 20/178 |
| GO:0009410 | response to xenobiotic stimulus                                 | 6  | 178 | 33/3649  | 4.56e-03 | 4.56e-03 | 1.46e-01 | 4  | ADIPOQ; ANKRD1; MEF2C; TGFB2                                                                | 2 | MYC; NCEH1                                              | 4/178  | 2/178 | 6/178  |
| GO:0014706 | striated muscle tissue development                              | 6  | 178 | 33/3649  | 4.56e-03 | 4.56e-03 | 1.46e-01 | 5  | ANKRD1; FGF2; MEF2C; PI16; TGFB2                                                            | 1 | ACADM                                                   | 5/178  | 1/178 | 6/178  |
| GO:0043068 | positive regulation of programmed cell death                    | 11 | 178 | 92/3649  | 4.63e-03 | 4.63e-03 | 1.46e-01 | 6  | ADIPOQ; ANKRD1; CLU; MEF2C; MLLT11; TGFB2                                                   | 5 | CDK5R1; DNAJA1; GADD45A; MYC; SHQ1                      | 6/178  | 5/178 | 11/178 |
| GO:0035051 | cardiocyte differentiation                                      | 5  | 178 | 24/3649  | 5.20e-03 | 5.20e-03 | 1.61e-01 | 4  | ECE2; MEF2C; PI16; TGFB2                                                                    | 2 | ACADM; ECE2                                             | 4/178  | 2/178 | 5/178  |
| GO:0044057 | regulation of system process                                    | 10 | 178 | 81/3649  | 5.45e-03 | 5.45e-03 | 1.64e-01 | 7  | ADIPOQ; INHBB; LMCD1; ORMDL3; PI16; PRKAG3; TGFB2                                           | 3 | AGTR1; SCN3B; SCN4B                                     | 7/178  | 3/178 | 10/178 |
| GO:1901617 | organic hydroxy compound biosynthetic process                   | 7  | 178 | 45/3649  | 5.49e-03 | 5.49e-03 | 1.64e-01 | 6  | CYP51A1; FGF2; LSS; NR1D1; PMVK; SPTSSA                                                     | 1 | DDC                                                     | 6/178  | 1/178 | 7/178  |
| GO:0032872 | regulation of stress-activated MAPK cascade                     | 5  | 178 | 25/3649  | 6.25e-03 | 6.25e-03 | 1.76e-01 | 1  | TGFB2                                                                                       | 4 | DNAJA1; GADD45A; IGF1R; MYC                             | 1/178  | 4/178 | 5/178  |
| GO:0006637 | acyl-CoA metabolic process                                      | 4  | 178 | 16/3649  | 6.28e-03 | 6.28e-03 | 1.76e-01 | 2  | ACACA; PMVK                                                                                 | 2 | ACAT1; FITM2                                            | 2/178  | 2/178 | 4/178  |
| GO:0035383 | thioester metabolic process                                     | 4  | 178 | 16/3649  | 6.28e-03 | 6.28e-03 | 1.76e-01 | 2  | ACACA; PMVK                                                                                 | 2 | ACAT1; FITM2                                            | 2/178  | 2/178 | 4/178  |
| GO:0016042 | lipid catabolic process                                         | 9  | 178 | 70/3649  | 6.32e-03 | 6.32e-03 | 1.76e-01 | 1  | ADIPOQ                                                                                      | 8 | ACADM; ACADVL; ACAT1; CPT1B; CPT2; NCEH1; PLA2G7; PLIN5 | 1/178  | 8/178 | 9/178  |
| GO:0044282 | small molecule catabolic process                                | 10 | 178 | 84/3649  | 7.06e-03 | 7.06e-03 | 1.93e-01 | 4  | ADIPOQ; DBT; DDAH2; FAH                                                                     | 6 | ACADM; ACADVL; ACAT1; CPT1B; CPT2; PLIN5                | 4/178  | 6/178 | 10/178 |
| GO:0070302 | regulation of stress-activated protein kinase signaling cascade | 5  | 178 | 26/3649  | 7.44e-03 | 7.44e-03 | 1.98e-01 | 1  | TGFB2                                                                                       | 4 | DNAJA1; GADD45A; IGF1R; MYC                             | 1/178  | 4/178 | 5/178  |
| GO:0009725 | response to hormone                                             | 11 | 178 | 98/3649  | 7.49e-03 | 7.49e-03 | 1.98e-01 | 7  | ADIPOQ; INHBB; MEF2C; NR1D1; RBOX2; RXRG; TGFB2                                             | 4 | AGTR1; DNAJA1; IGF1R; SLC39A14                          | 7/178  | 4/178 | 11/178 |
| GO:0071900 | regulation of protein serine/threonine kinase activity          | 8  | 178 | 61/3649  | 8.77e-03 | 8.77e-03 | 2.29e-01 | 2  | ADIPOQ; PRKAG3                                                                              | 6 | CDK5R1; CHORDC1; CKS2; DNAJA1; GADD45A; MAP2K6          | 2/178  | 6/178 | 8/178  |
| GO:0006094 | gluconeogenesis                                                 | 4  | 178 | 18/3649  | 9.78e-03 | 9.78e-03 | 2.32e-01 | 1  | ADIPOQ                                                                                      | 3 | ACADM; FBP2; SLC39A14                                   | 1/178  | 3/178 | 4/178  |
| GO:0019319 | hexose biosynthetic process                                     | 4  | 178 | 18/3649  | 9.78e-03 | 9.78e-03 | 2.32e-01 | 1  | ADIPOQ                                                                                      | 3 | ACADM; FBP2; SLC39A14                                   | 1/178  | 3/178 | 4/178  |
| GO:0046889 | positive regulation of lipid biosynthetic process               | 4  | 178 | 18/3649  | 9.78e-03 | 9.78e-03 | 2.32e-01 | 1  | NR1D1                                                                                       | 3 | PLIN5; PRL; SLC27A1                                     | 1/178  | 3/178 | 4/178  |
| GO:0061077 | chaperone-mediated protein folding                              | 4  | 178 | 18/3649  | 9.78e-03 | 9.78e-03 | 2.32e-01 | 1  | CLU                                                                                         | 3 | CCT3; CHORDC1; HSPH1                                    | 1/178  | 3/178 | 4/178  |
| GO:0010942 | positive regulation of cell death                               | 11 | 178 | 102/3649 | 1.01e-02 | 1.01e-02 | 2.32e-01 | 6  | ADIPOQ; ANKRD1; CLU; MEF2C; MLLT11; TGFB2                                                   | 5 | CDK5R1; DNAJA1; GADD45A; MYC; SHQ1                      | 6/178  | 5/178 | 11/178 |
| GO:0001818 | negative regulation of cytokine production                      | 5  | 178 | 28/3649  | 1.03e-02 | 1.03e-02 | 2.32e-01 | 3  | ADIPOQ; INHBB; TGFB2                                                                        | 2 | HSP90AB1; LAPTM4B                                       | 3/178  | 2/178 | 5/178  |
| GO:0046165 | alcohol biosynthetic process                                    | 5  | 178 | 28/3649  | 1.03e-02 | 1.03e-02 | 2.32e-01 | 5  | CYP51A1; FGF2; LSS; PMVK; SPTSSA                                                            | 0 | 0                                                       | 5/178  | 0/178 | 5/178  |
| GO:0071560 | cellular response to transforming growth factor beta stimulus   | 6  | 178 | 39/3649  | 1.05e-02 | 1.05e-02 | 2.32e-01 | 3  | ANKRD1; MEF2C; TGFB2                                                                        | 3 | ASPN; HSP90AB1; NRROS                                   | 3/178  | 3/178 | 6/178  |
| GO:0006084 | acetyl-CoA metabolic process                                    | 3  | 178 | 10/3649  | 1.06e-02 | 1.06e-02 | 2.32e-01 | 2  | ACACA; PMVK                                                                                 | 1 | ACAT1                                                   | 2/178  | 1/178 | 3/178  |

|            |                                                                 |    |     |          |          |          |          |    |                                                                               |    |                                                                                                                               |        |        |        |
|------------|-----------------------------------------------------------------|----|-----|----------|----------|----------|----------|----|-------------------------------------------------------------------------------|----|-------------------------------------------------------------------------------------------------------------------------------|--------|--------|--------|
| GO:0014855 | striated muscle cell proliferation                              | 3  | 178 | 10/3649  | 1.06e-02 | 1.06e-02 | 2.32e-01 | 3  | <i>FGF2; MEF2C; TGFB2</i>                                                     | 0  | 0                                                                                                                             | 3/178  | 0/178  | 3/178  |
| GO:0033344 | cholesterol efflux                                              | 3  | 178 | 10/3649  | 1.06e-02 | 1.06e-02 | 2.32e-01 | 3  | <i>ADIPOQ; APOE; EEPD1</i>                                                    | 0  | 0                                                                                                                             | 3/178  | 0/178  | 3/178  |
| GO:0034389 | lipid droplet organization                                      | 3  | 178 | 10/3649  | 1.06e-02 | 1.06e-02 | 2.32e-01 | 1  | <i>CIDEA</i>                                                                  | 2  | <i>FITM2; PLIN5</i>                                                                                                           | 1/178  | 2/178  | 3/178  |
| GO:0071692 | protein localization to extracellular region                    | 6  | 178 | 40/3649  | 1.19e-02 | 1.19e-02 | 2.42e-01 | 5  | <i>ANKRD1; INHBB; NR1D1; RHBDF1; TGFB2</i>                                    | 1  | <i>NRROS</i>                                                                                                                  | 5/178  | 1/178  | 6/178  |
| GO:0033865 | nucleoside bisphosphate metabolic process                       | 4  | 178 | 19/3649  | 1.19e-02 | 1.19e-02 | 2.42e-01 | 2  | <i>ACACA; PMVK</i>                                                            | 2  | <i>ACAT1; FITM2</i>                                                                                                           | 2/178  | 2/178  | 4/178  |
| GO:0033875 | ribonucleoside bisphosphate metabolic process                   | 4  | 178 | 19/3649  | 1.19e-02 | 1.19e-02 | 2.42e-01 | 2  | <i>ACACA; PMVK</i>                                                            | 2  | <i>ACAT1; FITM2</i>                                                                                                           | 2/178  | 2/178  | 4/178  |
| GO:0034032 | purine nucleoside bisphosphate metabolic process                | 4  | 178 | 19/3649  | 1.19e-02 | 1.19e-02 | 2.42e-01 | 2  | <i>ACACA; PMVK</i>                                                            | 2  | <i>ACAT1; FITM2</i>                                                                                                           | 2/178  | 2/178  | 4/178  |
| GO:0071901 | negative regulation of protein serine/threonine kinase activity | 4  | 178 | 19/3649  | 1.19e-02 | 1.19e-02 | 2.42e-01 | 1  | <i>ADIPOQ</i>                                                                 | 3  | <i>CHORDC1; DNAJA1; GADD45A</i>                                                                                               | 1/178  | 3/178  | 4/178  |
| GO:0050708 | regulation of protein secretion                                 | 5  | 178 | 29/3649  | 1.19e-02 | 1.19e-02 | 2.42e-01 | 5  | <i>ANKRD1; INHBB; NR1D1; RHBDF1; TGFB2</i>                                    | 0  | 0                                                                                                                             | 5/178  | 0/178  | 5/178  |
| GO:0045892 | negative regulation of transcription, DNA-templated             | 14 | 178 | 148/3649 | 1.21e-02 | 1.21e-02 | 2.42e-01 | 8  | <i>ADIPOQ; ANKRD1; FABP4; LMCD1; MEF2C; NR1D1; NUPR2; RBFOX2</i>              | 6  | <i>CDK5R1; GADD45A; HSPA8; MYC; RNF168; THAP1</i>                                                                             | 8/178  | 6/178  | 14/178 |
| GO:1902679 | negative regulation of RNA biosynthetic process                 | 14 | 178 | 149/3649 | 1.28e-02 | 1.28e-02 | 2.50e-01 | 8  | <i>ADIPOQ; ANKRD1; FABP4; LMCD1; MEF2C; NR1D1; NUPR2; RBFOX2</i>              | 6  | <i>CDK5R1; GADD45A; HSPA8; MYC; RNF168; THAP1</i>                                                                             | 8/178  | 6/178  | 14/178 |
| GO:1903507 | negative regulation of nucleic acid-templated transcription     | 14 | 178 | 149/3649 | 1.28e-02 | 1.28e-02 | 2.50e-01 | 8  | <i>ADIPOQ; ANKRD1; FABP4; LMCD1; MEF2C; NR1D1; NUPR2; RBFOX2</i>              | 6  | <i>CDK5R1; GADD45A; HSPA8; MYC; RNF168; THAP1</i>                                                                             | 8/178  | 6/178  | 14/178 |
| GO:0071559 | response to transforming growth factor beta                     | 6  | 178 | 41/3649  | 1.34e-02 | 1.34e-02 | 2.53e-01 | 3  | <i>ANKRD1; MEF2C; TGFB2</i>                                                   | 3  | <i>ASPN; HSP90AB1; NRROS</i>                                                                                                  | 3/178  | 3/178  | 6/178  |
| GO:0006694 | steroid biosynthetic process                                    | 5  | 178 | 30/3649  | 1.38e-02 | 1.38e-02 | 2.53e-01 | 5  | <i>CYP51A1; HSD17B12; LSS; NR1D1; PMVK</i>                                    | 0  | 0                                                                                                                             | 5/178  | 0/178  | 5/178  |
| GO:0009166 | nucleotide catabolic process                                    | 3  | 178 | 11/3649  | 1.41e-02 | 1.41e-02 | 2.53e-01 | 1  | <i>NT5E</i>                                                                   | 2  | <i>ACAT1; FITM2</i>                                                                                                           | 1/178  | 2/178  | 3/178  |
| GO:0010866 | regulation of triglyceride biosynthetic process                 | 3  | 178 | 11/3649  | 1.41e-02 | 1.41e-02 | 2.53e-01 | 0  | 0                                                                             | 3  | <i>FITM2; PLIN5; SLC27A1</i>                                                                                                  | 0/178  | 3/178  | 3/178  |
| GO:0042304 | regulation of fatty acid biosynthetic process                   | 3  | 178 | 11/3649  | 1.41e-02 | 1.41e-02 | 2.53e-01 | 0  | 0                                                                             | 3  | <i>ACADVL; BRCA1; PRL</i>                                                                                                     | 0/178  | 3/178  | 3/178  |
| GO:0046328 | regulation of JNK cascade                                       | 3  | 178 | 11/3649  | 1.41e-02 | 1.41e-02 | 2.53e-01 | 0  | 0                                                                             | 3  | <i>DNAJA1; GADD45A; IGF1R</i>                                                                                                 | 0/178  | 3/178  | 3/178  |
| GO:0046364 | monosaccharide biosynthetic process                             | 4  | 178 | 20/3649  | 1.43e-02 | 1.43e-02 | 2.53e-01 | 1  | <i>ADIPOQ</i>                                                                 | 3  | <i>ACADM; FBP2; SLC39A14</i>                                                                                                  | 1/178  | 3/178  | 4/178  |
| GO:0062013 | positive regulation of small molecule metabolic process         | 4  | 178 | 20/3649  | 1.43e-02 | 1.43e-02 | 2.53e-01 | 2  | <i>ADIPOQ; NR1D1</i>                                                          | 2  | <i>PLIN5; PRL</i>                                                                                                             | 2/178  | 2/178  | 4/178  |
| GO:0062014 | negative regulation of small molecule metabolic process         | 4  | 178 | 20/3649  | 1.43e-02 | 1.43e-02 | 2.53e-01 | 1  | <i>ADIPOQ</i>                                                                 | 3  | <i>ACADVL; BRCA1; PLIN5</i>                                                                                                   | 1/178  | 3/178  | 4/178  |
| GO:0051253 | negative regulation of RNA metabolic process                    | 15 | 178 | 168/3649 | 1.57e-02 | 1.57e-02 | 2.75e-01 | 8  | <i>ADIPOQ; ANKRD1; FABP4; LMCD1; MEF2C; NR1D1; NUPR2; RBFOX2</i>              | 7  | <i>CDK5R1; GADD45A; HSPA8; MYC; RNF168; SHQ1; THAP1</i>                                                                       | 8/178  | 7/178  | 15/178 |
| GO:0032870 | cellular response to hormone stimulus                           | 9  | 178 | 81/3649  | 1.60e-02 | 1.60e-02 | 2.76e-01 | 5  | <i>ADIPOQ; INHBB; MEF2C; RBFOX2; RXRG</i>                                     | 4  | <i>AGTR1; DNAJA1; IGF1R; SLC39A14</i>                                                                                         | 5/178  | 4/178  | 9/178  |
| GO:0071495 | cellular response to endogenous stimulus                        | 16 | 178 | 184/3649 | 1.62e-02 | 1.62e-02 | 2.76e-01 | 8  | <i>ADIPOQ; ANKRD1; FGF2; INHBB; MEF2C; RBFOX2; RXRG; TGFB2</i>                | 8  | <i>AGTR1; ASPN; COL4A1; DNAJA1; HSP90AB1; IGF1R; NRROS; SLC39A14</i>                                                          | 8/178  | 8/178  | 16/178 |
| GO:0031324 | negative regulation of cellular metabolic process               | 26 | 178 | 348/3649 | 1.67e-02 | 1.67e-02 | 2.82e-01 | 10 | <i>ADIPOQ; ANKRD1; FABP4; LMCD1; MEF2C; NR1D1; NUPR2; PI16; RBFOX2; TGFB2</i> | 16 | <i>ACADVL; ALAD; BCL2; BRCA1; CDK5R1; CHORDC1; DNAJA1; GADD45A; HSP90AB1; HSPA8; LAPTM4B; MYC; PLIN5; RNF168; SHQ1; THAP1</i> | 10/178 | 16/178 | 26/178 |
| GO:0070201 | regulation of establishment of protein localization             | 9  | 178 | 82/3649  | 1.73e-02 | 1.73e-02 | 2.83e-01 | 6  | <i>ADIPOQ; ANKRD1; INHBB; NR1D1; RHBDF1; TGFB2</i>                            | 3  | <i>CCT3; CDK5R1; DNAJA1</i>                                                                                                   | 6/178  | 3/178  | 9/178  |
| GO:0009892 | negative regulation of metabolic process                        | 31 | 178 | 436/3649 | 1.77e-02 | 1.77e-02 | 2.83e-01 | 13 | <i>ADIPOQ; ANKRD1; APOE; CLU; FABP4; INHBB; LMCD1;</i>                        | 18 | <i>ACADVL; ALAD; BCL2; BRCA1; CDK5R1;</i>                                                                                     | 13/178 | 18/178 | 31/178 |

|            |                                                                |    |     |          |          |          |          |    |                                                                                                                        |    |                                                                                                                          |        |        |        |
|------------|----------------------------------------------------------------|----|-----|----------|----------|----------|----------|----|------------------------------------------------------------------------------------------------------------------------|----|--------------------------------------------------------------------------------------------------------------------------|--------|--------|--------|
|            |                                                                |    |     |          |          |          |          |    | MEF2C; NR1D1;<br>NUPR2; PI16;<br>RBFox2; TGFB2                                                                         |    | CHORDC1;<br>DNAJA1;<br>GADD45A;<br>HSP90AB1; HSPA8;<br>LAPTM4B;<br>MAP2K6; MYC;<br>PLIN5; PRL;<br>RNF168; SHQ1;<br>THAP1 |        |        |        |
| GO:0010921 | regulation of phosphatase activity                             | 3  | 178 | 12/3649  | 1.81e-02 | 1.81e-02 | 2.83e-01 | 2  | MEF2C; TGFB2                                                                                                           | 1  | CASZ1                                                                                                                    | 2/178  | 1/178  | 3/178  |
| GO:0035850 | epithelial cell differentiation involved in kidney development | 3  | 178 | 12/3649  | 1.81e-02 | 1.81e-02 | 2.83e-01 | 2  | ADIPOQ; MEF2C                                                                                                          | 1  | ACTA2                                                                                                                    | 2/178  | 1/178  | 3/178  |
| GO:0046620 | regulation of organ growth                                     | 3  | 178 | 12/3649  | 1.81e-02 | 1.81e-02 | 2.83e-01 | 3  | FGF2; MEF2C; PI16                                                                                                      | 0  | 0                                                                                                                        | 3/178  | 0/178  | 3/178  |
| GO:0051153 | regulation of striated muscle cell differentiation             | 3  | 178 | 12/3649  | 1.81e-02 | 1.81e-02 | 2.83e-01 | 2  | MEF2C; PI16                                                                                                            | 1  | MAMSTR                                                                                                                   | 2/178  | 1/178  | 3/178  |
| GO:0060193 | positive regulation of lipase activity                         | 3  | 178 | 12/3649  | 1.81e-02 | 1.81e-02 | 2.83e-01 | 1  | FGF2                                                                                                                   | 2  | AGTR1; PLIN5                                                                                                             | 1/178  | 2/178  | 3/178  |
| GO:0098739 | import across plasma membrane                                  | 3  | 178 | 12/3649  | 1.81e-02 | 1.81e-02 | 2.83e-01 | 1  | SLC46A1                                                                                                                | 2  | SLC39A14;<br>SLC43A2                                                                                                     | 1/178  | 2/178  | 3/178  |
| GO:0007167 | enzyme linked receptor protein signaling pathway               | 12 | 178 | 126/3649 | 1.87e-02 | 1.87e-02 | 2.89e-01 | 4  | ADIPOQ; INHBB;<br>RHBDF1; TGFB2                                                                                        | 8  | ASP; CDK5R1;<br>COL4A1;<br>HSP90AB1; IGF1R;<br>NCEH1; NRROS;<br>SLC39A14                                                 | 4/178  | 8/178  | 12/178 |
| GO:0031327 | negative regulation of cellular biosynthetic process           | 16 | 178 | 188/3649 | 1.95e-02 | 1.95e-02 | 2.98e-01 | 8  | ADIPOQ; ANKRD1;<br>FABP4; LMCD1;<br>MEF2C; NR1D1;<br>NUPR2; RBFox2                                                     | 8  | ACADVL; BRCA1;<br>CDK5R1;<br>GADD45A; HSPA8;<br>MYC; RNF168;<br>THAP1                                                    | 8/178  | 8/178  | 16/178 |
| GO:0008202 | steroid metabolic process                                      | 7  | 178 | 57/3649  | 1.96e-02 | 1.96e-02 | 2.98e-01 | 5  | CYP51A1; HSD17B12;<br>LSS; NR1D1; PMVK                                                                                 | 2  | ACADVL; AGTR1                                                                                                            | 5/178  | 2/178  | 7/178  |
| GO:0061448 | connective tissue development                                  | 6  | 178 | 45/3649  | 2.07e-02 | 2.07e-02 | 3.11e-01 | 3  | FGF2; MEF2C; MYF5                                                                                                      | 3  | ACTA2; MGP;<br>SLC39A14                                                                                                  | 3/178  | 3/178  | 6/178  |
| GO:0060537 | muscle tissue development                                      | 8  | 178 | 71/3649  | 2.10e-02 | 2.10e-02 | 3.13e-01 | 5  | ANKRD1; FGF2;<br>MEF2C; PI16; TGFB2                                                                                    | 3  | ACADM; ACTA2;<br>RIPOR2                                                                                                  | 5/178  | 3/178  | 8/178  |
| GO:0062012 | regulation of small molecule metabolic process                 | 7  | 178 | 58/3649  | 2.14e-02 | 2.14e-02 | 3.14e-01 | 2  | ADIPOQ; NR1D1                                                                                                          | 5  | ACADM; ACADVL;<br>BRCA1; PLIN5;<br>PRL                                                                                   | 2/178  | 5/178  | 7/178  |
| GO:0009719 | response to endogenous stimulus                                | 17 | 178 | 207/3649 | 2.24e-02 | 2.24e-02 | 3.14e-01 | 9  | ADIPOQ; ANKRD1;<br>FGF2; INHBB;<br>MEF2C; NR1D1;<br>RBFox2; RXRG;<br>TGFB2                                             | 8  | AGTR1; ASPN;<br>COL4A1; DNAJA1;<br>HSP90AB1; IGF1R;<br>NRROS; SLC39A14                                                   | 9/178  | 8/178  | 17/178 |
| GO:0001676 | long-chain fatty acid metabolic process                        | 3  | 178 | 13/3649  | 2.27e-02 | 2.27e-02 | 3.14e-01 | 1  | ACSM1                                                                                                                  | 2  | CPT2; SLC27A1                                                                                                            | 1/178  | 2/178  | 3/178  |
| GO:0007254 | JNK cascade                                                    | 3  | 178 | 13/3649  | 2.27e-02 | 2.27e-02 | 3.14e-01 | 0  | 0                                                                                                                      | 3  | DNAJA1;<br>GADD45A; IGF1R                                                                                                | 0/178  | 3/178  | 3/178  |
| GO:0090207 | regulation of triglyceride metabolic process                   | 3  | 178 | 13/3649  | 2.27e-02 | 2.27e-02 | 3.14e-01 | 0  | 0                                                                                                                      | 3  | FITM2; PLIN5;<br>SLC27A1                                                                                                 | 0/178  | 3/178  | 3/178  |
| GO:1901292 | nucleoside phosphate catabolic process                         | 3  | 178 | 13/3649  | 2.27e-02 | 2.27e-02 | 3.14e-01 | 1  | NT5E                                                                                                                   | 2  | ACAT1; FITM2                                                                                                             | 1/178  | 2/178  | 3/178  |
| GO:0030336 | negative regulation of cell migration                          | 6  | 178 | 46/3649  | 2.29e-02 | 2.29e-02 | 3.14e-01 | 3  | ADIPOQ; FGF2;<br>PFN2                                                                                                  | 3  | GADD45A;<br>PTGER4; RIPOR2                                                                                               | 3/178  | 3/178  | 6/178  |
| GO:0042180 | cellular ketone metabolic process                              | 6  | 178 | 46/3649  | 2.29e-02 | 2.29e-02 | 3.14e-01 | 2  | ADIPOQ; NR1D1                                                                                                          | 4  | ACADVL; BRCA1;<br>PLIN5; PRL                                                                                             | 2/178  | 4/178  | 6/178  |
| GO:0042391 | regulation of membrane potential                               | 6  | 178 | 46/3649  | 2.29e-02 | 2.29e-02 | 3.14e-01 | 3  | CHRNA3; CHRNE;<br>MLLT11                                                                                               | 3  | BCL2; SCN3B;<br>SCN4B                                                                                                    | 3/178  | 3/178  | 6/178  |
| GO:0051216 | cartilage development                                          | 5  | 178 | 34/3649  | 2.30e-02 | 2.30e-02 | 3.14e-01 | 3  | FGF2; MEF2C; MYF5                                                                                                      | 2  | MGP; SLC39A14                                                                                                            | 3/178  | 2/178  | 5/178  |
| GO:0051172 | negative regulation of nitrogen compound metabolic process     | 24 | 178 | 324/3649 | 2.33e-02 | 2.33e-02 | 3.14e-01 | 12 | ADIPOQ; ANKRD1;<br>APOE; CLU; FABP4;<br>INHBB; LMCD1;<br>MEF2C; NR1D1;<br>NUPR2; PI16;<br>RBFox2                       | 12 | ALAD; CDK5R1;<br>CHORDC1;<br>DNAJA1;<br>GADD45A;<br>HSP90AB1; HSPA8;<br>LAPTM4B; MYC;<br>RNF168; SHQ1;<br>THAP1          | 12/178 | 12/178 | 24/178 |
| GO:0098657 | import into cell                                               | 4  | 178 | 23/3649  | 2.34e-02 | 2.34e-02 | 3.14e-01 | 1  | SLC46A1                                                                                                                | 3  | SLC27A1;<br>SLC39A14;<br>SLC43A2                                                                                         | 1/178  | 3/178  | 4/178  |
| GO:0051239 | regulation of multicellular organismal process                 | 28 | 178 | 393/3649 | 2.35e-02 | 2.35e-02 | 3.14e-01 | 15 | ADIPOQ; APOE;<br>FGF2; INHBB; ITGB6;<br>LMCD1; LRRN1;<br>LUM; MEF2C;<br>NR1D1; ORMDL3;<br>PFN2; PI16; PRKAG3;<br>TGFB2 | 13 | AGTR1; ASPN;<br>CDK5R1;<br>GADD45A;<br>HSP90AB1;<br>LAPTM4B;<br>MAP2K6; MGP;<br>MYC; PRL; RAB7B;<br>SCN3B; SCN4B         | 15/178 | 13/178 | 28/178 |

|            |                                                                         |    |     |          |          |          |          |   |                                                            |   |                                                           |       |       |        |
|------------|-------------------------------------------------------------------------|----|-----|----------|----------|----------|----------|---|------------------------------------------------------------|---|-----------------------------------------------------------|-------|-------|--------|
| GO:0043086 | negative regulation of catalytic activity                               | 12 | 178 | 131/3649 | 2.46e-02 | 2.46e-02 | 3.26e-01 | 6 | ADIPOQ; FABP4; ORMDL3; PI16; PPP1R1B; TGFB2                | 6 | ANGPTL4; CHORDC1; DNAJA1; GADD45A; PLIN5; SLC39A14        | 6/178 | 6/178 | 12/178 |
| GO:0051146 | striated muscle cell differentiation                                    | 6  | 178 | 47/3649  | 2.52e-02 | 2.52e-02 | 3.30e-01 | 2 | MEF2C; PI16                                                | 4 | ACADM; ACTA2; MAMSTR; RIPOR2                              | 2/178 | 4/178 | 6/178  |
| GO:0015849 | organic acid transport                                                  | 5  | 178 | 35/3649  | 2.58e-02 | 2.58e-02 | 3.36e-01 | 3 | FABP4; SLC25A29; SLC46A1                                   | 2 | SLC27A1; SLC43A2                                          | 3/178 | 2/178 | 5/178  |
| GO:0045934 | negative regulation of nucleobase-containing compound metabolic process | 15 | 178 | 179/3649 | 2.65e-02 | 2.65e-02 | 3.42e-01 | 8 | ADIPOQ; ANKRD1; FABP4; LMC1D1; MEF2C; NR1D1; NUPR2; RBFOX2 | 7 | CDK5R1; GADD45A; HSPA8; MYC; RNF168; SHQ1; THAP1          | 8/178 | 7/178 | 15/178 |
| GO:0009612 | response to mechanical stimulus                                         | 4  | 178 | 24/3649  | 2.70e-02 | 2.70e-02 | 3.42e-01 | 1 | ANKRD1                                                     | 3 | GADD45A; PRL; TMEM120A                                    | 1/178 | 3/178 | 4/178  |
| GO:0010817 | regulation of hormone levels                                            | 7  | 178 | 61/3649  | 2.75e-02 | 2.75e-02 | 3.42e-01 | 5 | CPQ; ECE2; HSD17B12; INHBB; NR1D1                          | 3 | ECE2; PRL; SLC39A14                                       | 5/178 | 3/178 | 7/178  |
| GO:0072001 | renal system development                                                | 6  | 178 | 48/3649  | 2.76e-02 | 2.76e-02 | 3.42e-01 | 3 | ADIPOQ; FGF2; MEF2C                                        | 3 | ACTA2; AGTR1; COL4A1                                      | 3/178 | 3/178 | 6/178  |
| GO:2000146 | negative regulation of cell motility                                    | 6  | 178 | 48/3649  | 2.76e-02 | 2.76e-02 | 3.42e-01 | 3 | ADIPOQ; FGF2; PFN2                                         | 3 | GADD45A; PTGER4; RIPOR2                                   | 3/178 | 3/178 | 6/178  |
| GO:0014066 | regulation of phosphatidylinositol 3-kinase signaling                   | 3  | 178 | 14/3649  | 2.79e-02 | 2.79e-02 | 3.42e-01 | 3 | FBXL2; FGF2; TGFB2                                         | 0 | 0                                                         | 3/178 | 0/178 | 3/178  |
| GO:0019432 | triglyceride biosynthetic process                                       | 3  | 178 | 14/3649  | 2.79e-02 | 2.79e-02 | 3.42e-01 | 0 | 0                                                          | 3 | FITM2; PLIN5; SLC27A1                                     | 0/178 | 3/178 | 3/178  |
| GO:0061005 | cell differentiation involved in kidney development                     | 3  | 178 | 14/3649  | 2.79e-02 | 2.79e-02 | 3.42e-01 | 2 | ADIPOQ; MEF2C                                              | 1 | ACTA2                                                     | 2/178 | 1/178 | 3/178  |
| GO:0071897 | DNA biosynthetic process                                                | 5  | 178 | 36/3649  | 2.88e-02 | 2.88e-02 | 3.46e-01 | 3 | ADIPOQ; ANKRD1; FGF2                                       | 2 | CCT3; MYC                                                 | 3/178 | 2/178 | 5/178  |
| GO:1903828 | negative regulation of protein localization                             | 5  | 178 | 36/3649  | 2.88e-02 | 2.88e-02 | 3.46e-01 | 3 | ADIPOQ; INHBB; RHBDF1                                      | 2 | DNAJA1; RIPOR2                                            | 3/178 | 2/178 | 5/178  |
| GO:0009890 | negative regulation of biosynthetic process                             | 16 | 178 | 197/3649 | 2.89e-02 | 2.89e-02 | 3.46e-01 | 8 | ADIPOQ; ANKRD1; FABP4; LMC1D1; MEF2C; NR1D1; NUPR2; RBFOX2 | 8 | ACADVL; BRCA1; CDK5R1; GADD45A; HSPA8; MYC; RNF168; THAP1 | 8/178 | 8/178 | 16/178 |
| GO:0040013 | negative regulation of locomotion                                       | 6  | 178 | 49/3649  | 3.03e-02 | 3.03e-02 | 3.55e-01 | 3 | ADIPOQ; FGF2; PFN2                                         | 3 | GADD45A; PTGER4; RIPOR2                                   | 3/178 | 3/178 | 6/178  |
| GO:0051271 | negative regulation of cellular component movement                      | 6  | 178 | 49/3649  | 3.03e-02 | 3.03e-02 | 3.55e-01 | 3 | ADIPOQ; FGF2; PFN2                                         | 3 | GADD45A; PTGER4; RIPOR2                                   | 3/178 | 3/178 | 6/178  |
| GO:0051223 | regulation of protein transport                                         | 8  | 178 | 76/3649  | 3.03e-02 | 3.03e-02 | 3.55e-01 | 6 | ADIPOQ; ANKRD1; INHBB; NR1D1; RHBDF1; TGFB2                | 2 | CDK5R1; DNAJA1                                            | 6/178 | 2/178 | 8/178  |
| GO:0033002 | muscle cell proliferation                                               | 4  | 178 | 25/3649  | 3.10e-02 | 3.10e-02 | 3.58e-01 | 4 | ADIPOQ; FGF2; MEF2C; TGFB2                                 | 0 | 0                                                         | 4/178 | 0/178 | 4/178  |
| GO:0035265 | organ growth                                                            | 4  | 178 | 25/3649  | 3.10e-02 | 3.10e-02 | 3.58e-01 | 4 | FGF2; MEF2C; PI16; TGFB2                                   | 0 | 0                                                         | 4/178 | 0/178 | 4/178  |
| GO:0030198 | extracellular matrix organization                                       | 5  | 178 | 37/3649  | 3.20e-02 | 3.20e-02 | 3.65e-01 | 4 | LUM; MYF5; OLFML2B; TGFB2                                  | 1 | COL4A1                                                    | 4/178 | 1/178 | 5/178  |
| GO:0045229 | external encapsulating structure organization                           | 5  | 178 | 37/3649  | 3.20e-02 | 3.20e-02 | 3.65e-01 | 4 | LUM; MYF5; OLFML2B; TGFB2                                  | 1 | COL4A1                                                    | 4/178 | 1/178 | 5/178  |
| GO:0006695 | cholesterol biosynthetic process                                        | 3  | 178 | 15/3649  | 3.37e-02 | 3.37e-02 | 3.66e-01 | 3 | CYP51A1; LSS; PMVK                                         | 0 | 0                                                         | 3/178 | 0/178 | 3/178  |
| GO:0032835 | glomerulus development                                                  | 3  | 178 | 15/3649  | 3.37e-02 | 3.37e-02 | 3.66e-01 | 2 | ADIPOQ; MEF2C                                              | 1 | ACTA2                                                     | 2/178 | 1/178 | 3/178  |
| GO:0055007 | cardiac muscle cell differentiation                                     | 3  | 178 | 15/3649  | 3.37e-02 | 3.37e-02 | 3.66e-01 | 2 | MEF2C; PI16                                                | 1 | ACADM                                                     | 2/178 | 1/178 | 3/178  |
| GO:0061333 | renal tubule morphogenesis                                              | 3  | 178 | 15/3649  | 3.37e-02 | 3.37e-02 | 3.66e-01 | 2 | FGF2; MEF2C                                                | 1 | COL4A1                                                    | 2/178 | 1/178 | 3/178  |
| GO:0070167 | regulation of biomineral tissue development                             | 3  | 178 | 15/3649  | 3.37e-02 | 3.37e-02 | 3.66e-01 | 1 | MEF2C                                                      | 2 | ASPN; MGP                                                 | 1/178 | 2/178 | 3/178  |
| GO:0110149 | regulation of biomineralization                                         | 3  | 178 | 15/3649  | 3.37e-02 | 3.37e-02 | 3.66e-01 | 1 | MEF2C                                                      | 2 | ASPN; MGP                                                 | 1/178 | 2/178 | 3/178  |
| GO:1902653 | secondary alcohol biosynthetic process                                  | 3  | 178 | 15/3649  | 3.37e-02 | 3.37e-02 | 3.66e-01 | 3 | CYP51A1; LSS; PMVK                                         | 0 | 0                                                         | 3/178 | 0/178 | 3/178  |
| GO:0008015 | blood circulation                                                       | 8  | 178 | 78/3649  | 3.47e-02 | 3.47e-02 | 3.74e-01 | 3 | ADIPOQ; NPR3; TGFB2                                        | 5 | ACTA2; AGTR1; MAP2K6; SCN3B; SCN4B                        | 3/178 | 5/178 | 8/178  |
| GO:0072006 | nephron development                                                     | 4  | 178 | 26/3649  | 3.53e-02 | 3.53e-02 | 3.78e-01 | 3 | ADIPOQ; FGF2; MEF2C                                        | 1 | ACTA2                                                     | 3/178 | 1/178 | 4/178  |
| GO:0043062 | extracellular structure organization                                    | 5  | 178 | 38/3649  | 3.55e-02 | 3.55e-02 | 3.78e-01 | 4 | LUM; MYF5; OLFML2B; TGFB2                                  | 1 | COL4A1                                                    | 4/178 | 1/178 | 5/178  |

|            |                                                                          |    |     |          |          |          |          |    |                                                                    |    |                                                                          |        |        |        |
|------------|--------------------------------------------------------------------------|----|-----|----------|----------|----------|----------|----|--------------------------------------------------------------------|----|--------------------------------------------------------------------------|--------|--------|--------|
| GO:0030855 | epithelial cell differentiation                                          | 9  | 178 | 93/3649  | 3.59e-02 | 3.59e-02 | 3.80e-01 | 5  | ADIPOQ; FGF2; MEF2C; PTER; TDRD7                                   | 4  | ACADVL; ACTA2; RILPL2; TAGLN                                             | 5/178  | 4/178  | 9/178  |
| GO:0045859 | regulation of protein kinase activity                                    | 10 | 178 | 109/3649 | 3.82e-02 | 3.82e-02 | 3.91e-01 | 4  | ADIPOQ; FABP4; PRKAG3; TGFB2                                       | 6  | CDK5R1; CHORDC1; CKS2; DNAJA1; GADD45A; MAP2K6                           | 4/178  | 6/178  | 10/178 |
| GO:0001655 | urogenital system development                                            | 6  | 178 | 52/3649  | 3.91e-02 | 3.91e-02 | 3.91e-01 | 3  | ADIPOQ; FGF2; MEF2C                                                | 3  | ACTA2; AGTR1; COL4A1                                                     | 3/178  | 3/178  | 6/178  |
| GO:0007178 | transmembrane receptor protein serine/threonine kinase signaling pathway | 6  | 178 | 52/3649  | 3.91e-02 | 3.91e-02 | 3.91e-01 | 2  | INHBB; TGFB2                                                       | 4  | ASPEN; HSP90AB1; NCEH1; NRROS                                            | 2/178  | 4/178  | 6/178  |
| GO:0001654 | eye development                                                          | 5  | 178 | 39/3649  | 3.91e-02 | 3.91e-02 | 3.91e-01 | 4  | FGF2; MYF5; TDRD7; TGFB2                                           | 1  | COL4A1                                                                   | 4/178  | 1/178  | 5/178  |
| GO:0009306 | protein secretion                                                        | 5  | 178 | 39/3649  | 3.91e-02 | 3.91e-02 | 3.91e-01 | 5  | ANKRD1; INHBB; NR1D1; RHBDF1; TGFB2                                | 0  | 0                                                                        | 5/178  | 0/178  | 5/178  |
| GO:0031330 | negative regulation of cellular catabolic process                        | 5  | 178 | 39/3649  | 3.91e-02 | 3.91e-02 | 3.91e-01 | 0  | 0                                                                  | 5  | ALAD; BCL2; HSP90AB1; LAPTM4B; PLIN5                                     | 0/178  | 5/178  | 5/178  |
| GO:0035592 | establishment of protein localization to extracellular region            | 5  | 178 | 39/3649  | 3.91e-02 | 3.91e-02 | 3.91e-01 | 5  | ANKRD1; INHBB; NR1D1; RHBDF1; TGFB2                                | 0  | 0                                                                        | 5/178  | 0/178  | 5/178  |
| GO:0051092 | positive regulation of NF-kappaB transcription factor activity           | 4  | 178 | 27/3649  | 3.99e-02 | 3.99e-02 | 3.91e-01 | 1  | CLU                                                                | 3  | MAP3K13; PRL; RAB7B                                                      | 1/178  | 3/178  | 4/178  |
| GO:1904950 | negative regulation of establishment of protein localization             | 4  | 178 | 27/3649  | 3.99e-02 | 3.99e-02 | 3.91e-01 | 3  | ADIPOQ; INHBB; RHBDF1                                              | 1  | DNAJA1                                                                   | 3/178  | 1/178  | 4/178  |
| GO:0016126 | sterol biosynthetic process                                              | 3  | 178 | 16/3649  | 4.00e-02 | 4.00e-02 | 3.91e-01 | 3  | CYP51A1; LSS; PMVK                                                 | 0  | 0                                                                        | 3/178  | 0/178  | 3/178  |
| GO:0035725 | sodium ion transmembrane transport                                       | 3  | 178 | 16/3649  | 4.00e-02 | 4.00e-02 | 3.91e-01 | 0  | 0                                                                  | 3  | SCN3B; SCN4B; SLC4A4                                                     | 0/178  | 3/178  | 3/178  |
| GO:0051899 | membrane depolarization                                                  | 3  | 178 | 16/3649  | 4.00e-02 | 4.00e-02 | 3.91e-01 | 1  | MLLT11                                                             | 2  | SCN3B; SCN4B                                                             | 1/178  | 2/178  | 3/178  |
| GO:2000573 | positive regulation of DNA biosynthetic process                          | 3  | 178 | 16/3649  | 4.00e-02 | 4.00e-02 | 3.91e-01 | 1  | FGF2                                                               | 2  | CCT3; MYC                                                                | 1/178  | 2/178  | 3/178  |
| GO:0006469 | negative regulation of protein kinase activity                           | 5  | 178 | 40/3649  | 4.30e-02 | 4.30e-02 | 4.18e-01 | 2  | ADIPOQ; FABP4                                                      | 3  | CHORDC1; DNAJA1; GADD45A                                                 | 2/178  | 3/178  | 5/178  |
| GO:0016311 | dephosphorylation                                                        | 8  | 178 | 82/3649  | 4.48e-02 | 4.48e-02 | 4.23e-01 | 4  | MEF2C; NT5E; PPM1K; TGFB2                                          | 4  | CASZ1; CPPED1; FBP2; NCEH1                                               | 4/178  | 4/178  | 8/178  |
| GO:0009266 | response to temperature stimulus                                         | 4  | 178 | 28/3649  | 4.48e-02 | 4.48e-02 | 4.23e-01 | 0  | 0                                                                  | 4  | ACADM; ACADVL; CHORDC1; DNAJA1                                           | 0/178  | 4/178  | 4/178  |
| GO:0032869 | cellular response to insulin stimulus                                    | 4  | 178 | 28/3649  | 4.48e-02 | 4.48e-02 | 4.23e-01 | 2  | ADIPOQ; INHBB                                                      | 2  | IGF1R; SLC39A14                                                          | 2/178  | 2/178  | 4/178  |
| GO:0009888 | tissue development                                                       | 20 | 178 | 276/3649 | 4.53e-02 | 4.53e-02 | 4.23e-01 | 10 | ADIPOQ; ANKRD1; FGF2; MEF2C; MYF5; PI16; PTER; TDRD7; TGFB2; TUFT1 | 10 | ACADM; ACADVL; ACTA2; ASPN; COL4A1; MGP; RILPL2; RIPOR2; SLC39A14; TAGLN | 10/178 | 10/178 | 20/178 |
| GO:0051348 | negative regulation of transferase activity                              | 6  | 178 | 54/3649  | 4.58e-02 | 4.58e-02 | 4.23e-01 | 3  | ADIPOQ; FABP4; ORMDL3                                              | 3  | CHORDC1; DNAJA1; GADD45A                                                 | 3/178  | 3/178  | 6/178  |
| GO:0001503 | ossification                                                             | 7  | 178 | 68/3649  | 4.60e-02 | 4.60e-02 | 4.23e-01 | 4  | FGF2; MEF2C; MYF5; TGFB2                                           | 3  | ASPEN; MAP2K6; MGP                                                       | 4/178  | 3/178  | 7/178  |
| GO:0050673 | epithelial cell proliferation                                            | 7  | 178 | 68/3649  | 4.60e-02 | 4.60e-02 | 4.23e-01 | 4  | FGF2; MEF2C; NR1D1; TGFB2                                          | 3  | AGTR1; MYC; THAP1                                                        | 4/178  | 3/178  | 7/178  |
| GO:0045833 | negative regulation of lipid metabolic process                           | 3  | 178 | 17/3649  | 4.69e-02 | 4.69e-02 | 4.23e-01 | 0  | 0                                                                  | 3  | ACADVL; BRCA1; PLIN5                                                     | 0/178  | 3/178  | 3/178  |
| GO:0051261 | protein depolymerization                                                 | 3  | 178 | 17/3649  | 4.69e-02 | 4.69e-02 | 4.23e-01 | 1  | MAP6D1                                                             | 2  | HSPA8; MICAL3                                                            | 1/178  | 2/178  | 3/178  |
| GO:0061326 | renal tubule development                                                 | 3  | 178 | 17/3649  | 4.69e-02 | 4.69e-02 | 4.23e-01 | 2  | FGF2; MEF2C                                                        | 1  | COL4A1                                                                   | 2/178  | 1/178  | 3/178  |
| GO:1905954 | positive regulation of lipid localization                                | 3  | 178 | 17/3649  | 4.69e-02 | 4.69e-02 | 4.23e-01 | 1  | ADIPOQ                                                             | 2  | FITM2; PLIN5                                                             | 1/178  | 2/178  | 3/178  |
| GO:0048880 | sensory system development                                               | 5  | 178 | 41/3649  | 4.72e-02 | 4.72e-02 | 4.23e-01 | 4  | FGF2; MYF5; TDRD7; TGFB2                                           | 1  | COL4A1                                                                   | 4/178  | 1/178  | 5/178  |
| GO:0071375 | cellular response to peptide hormone stimulus                            | 5  | 178 | 41/3649  | 4.72e-02 | 4.72e-02 | 4.23e-01 | 2  | ADIPOQ; INHBB                                                      | 3  | AGTR1; IGF1R; SLC39A14                                                   | 2/178  | 3/178  | 5/178  |
| GO:0150063 | visual system development                                                | 5  | 178 | 41/3649  | 4.72e-02 | 4.72e-02 | 4.23e-01 | 4  | FGF2; MYF5; TDRD7; TGFB2                                           | 1  | COL4A1                                                                   | 4/178  | 1/178  | 5/178  |
| GO:0003013 | circulatory system process                                               | 8  | 178 | 83/3649  | 4.76e-02 | 4.76e-02 | 4.24e-01 | 3  | ADIPOQ; NPR3; TGFB2                                                | 5  | ACTA2; AGTR1; MAP2K6; SCN3B; SCN4B                                       | 3/178  | 5/178  | 8/178  |

|            |                   |   |     |         |          |          |          |   |                                                       |   |                    |       |       |       |
|------------|-------------------|---|-----|---------|----------|----------|----------|---|-------------------------------------------------------|---|--------------------|-------|-------|-------|
| GO:0007507 | heart development | 7 | 178 | 69/3649 | 4.92e-02 | 4.92e-02 | 4.36e-01 | 6 | <i>ANKRD1; ECE2;<br/>FGF2; MEF2C; PI16;<br/>TGFB2</i> | 2 | <i>ACADM; ECE2</i> | 6/178 | 2/178 | 7/178 |
|------------|-------------------|---|-----|---------|----------|----------|----------|---|-------------------------------------------------------|---|--------------------|-------|-------|-------|

---
