# Supplementary material for: Early Weaning Possibly Increases the Activity of Lipogenic and Adipogenic Pathways in Intramuscular Adipose Tissue of Nellore Calves
Source: MDPI journal article supplement (doi:10.3390/metabo13091028), 2023-09-21
Supplement: s1 [file s1]

# 1. Prospected DEGs to EW vs CW into Time 1

| ENSEMBL             | SYMBOL              | ENTREZID  | GENETYPE       | logFC      | logCPM     | F          | PValue   | FDR        |
|---------------------|---------------------|-----------|----------------|------------|------------|------------|----------|------------|
| ENSBTAG00000014197  | <i>SLC38A4</i>      | 527476    | protein-coding | 1.96760862 | 1.31931627 | 47.1604889 | 6.78E-08 | 0.00095419 |
| ENSBTAG00000008313  | <i>KLF15</i>        | 407241    | protein-coding | -1.3340748 | 3.58758725 | 32.5671916 | 2.11E-06 | 0.01063183 |
| ENSBTAG000000038397 | <i>BOLA-DRB2</i>    | 538700    | protein-coding | 4.82883661 | -0.1292263 | 32.0992771 | 2.38E-06 | 0.01063183 |
| ENSBTAG00000001879  | <i>PER2</i>         | 512237    | protein-coding | -1.1155324 | 4.19762175 | 29.6931973 | 4.55E-06 | 0.01063183 |
| ENSBTAG00000011617  | <i>MAMSTR</i>       | 505540    | protein-coding | 1.18628229 | 5.28737126 | 29.3653218 | 4.98E-06 | 0.01063183 |
| ENSBTAG00000008573  | <i>ZFP36</i>        | 282127    | protein-coding | 1.70977905 | 6.84759534 | 29.1909431 | 5.23E-06 | 0.01063183 |
| ENSBTAG00000016580  | <i>TEF</i>          | 616076    | protein-coding | -0.7705148 | 4.84639851 | 29.0510743 | 5.44E-06 | 0.01063183 |
| ENSBTAG00000006320  | <i>DBT</i>          | 280759    | protein-coding | -0.8022455 | 4.25959176 | 28.4311146 | 6.46E-06 | 0.01063183 |
| ENSBTAG00000004997  | <i>CTNNAL1</i>      | 515749    | protein-coding | -0.5779569 | 4.38934478 | 28.2504124 | 6.80E-06 | 0.01063183 |
| ENSBTAG000000037644 | <i>HBB</i>          | 280813    | protein-coding | 2.747092   | 1.38130493 | 27.3140321 | 8.86E-06 | 0.01247563 |
| ENSBTAG00000016444  | <i>RETREG1</i>      | 540068    | protein-coding | -1.4121939 | 5.55079677 | 26.639511  | 1.08E-05 | 0.01376688 |
| ENSBTAG00000002216  | <i>MYOD1</i>        | 281938    | protein-coding | 1.2456536  | 4.97894654 | 24.4335899 | 2.06E-05 | 0.02232196 |
| ENSBTAG000000054844 | <i>HBA1</i>         | 100140149 | protein-coding | 2.84118762 | -0.0496511 | 22.16739   | 4.14E-05 | 0.04159066 |
| ENSBTAG00000008564  | <i>LOC511161</i>    | 511161    | protein-coding | -2.3382612 | 1.11506481 | 21.3269542 | 5.40E-05 | 0.04410225 |
| ENSBTAG00000010502  | <i>SERTAD3</i>      | 767935    | protein-coding | 0.51812042 | 4.42123942 | 21.1571445 | 5.70E-05 | 0.04410225 |
| ENSBTAG000000039794 | <i>CSNK1B</i>       | 785423    | protein-coding | -0.5565634 | 2.54151174 | 21.0588369 | 5.88E-05 | 0.04410225 |
| ENSBTAG00000008057  | <i>PARVG</i>        | 790892    | protein-coding | 1.38889939 | 0.56873845 | 20.9238249 | 6.14E-05 | 0.04410225 |
| ENSBTAG00000012774  | <i>RAB7B</i>        | 538050    | protein-coding | 0.76092977 | 3.11049423 | 20.8416548 | 6.31E-05 | 0.04410225 |
| ENSBTAG00000011921  | <i>TIGIT</i>        | 100140801 | protein-coding | 3.35154312 | -0.6351425 | 20.3894445 | 7.30E-05 | 0.04410225 |
| ENSBTAG00000025550  | <i>PRR22</i>        | 616551    | protein-coding | -1.0220893 | 1.16540463 | 20.3791173 | 7.33E-05 | 0.04410225 |
| ENSBTAG00000001143  | <i>LOC512486</i>    | 512486    | protein-coding | 1.02085294 | 4.09341919 | 20.192599  | 7.79E-05 | 0.04410225 |
| ENSBTAG000000054661 | <i>MIR2887-1</i>    | 100498812 | ncRNA          | -4.2944742 | -0.992082  | 20.1740803 | 7.83E-05 | 0.04410225 |
| ENSBTAG00000027204  | <i>LOC100300510</i> | 100300510 | protein-coding | 1.56590918 | 1.37476048 | 19.7408816 | 9.03E-05 | 0.0488852  |

## 2. Prospected DEGs to EW vs CW into Time 2

| ENSEMBL            | SYMBOL   | ENTREZID  | GENETYPE       | logFC      | logCPM     | F          | PValue   | FDR        |
|--------------------|----------|-----------|----------------|------------|------------|------------|----------|------------|
| ENSBTAG00000018352 | ABRA     | 539379    | protein-coding | -1.67359   | 5.00194902 | 65.5984173 | 2.00E-09 | 1.55E-05   |
| ENSBTAG00000032534 | RHOF     | 617894    | protein-coding | -0.969409  | 4.59044253 | 65.0272227 | 2.20E-09 | 1.55E-05   |
| ENSBTAG00000023745 | BANP     | 513446    | protein-coding | -0.8385521 | 3.6340194  | 49.3524359 | 4.28E-08 | 0.00020076 |
| ENSBTAG00000055207 | SCD      | 280924    | protein-coding | 1.70030698 | 6.29933393 | 43.1166075 | 1.64E-07 | 0.00057722 |
| ENSBTAG00000001027 | SERPINH1 | 510850    | protein-coding | -0.8794851 | 6.48306976 | 40.8459749 | 2.75E-07 | 0.00066496 |
| ENSBTAG00000032996 | P4HA1    | 518288    | protein-coding | -0.5864958 | 4.79769172 | 40.7188043 | 2.83E-07 | 0.00066496 |
| ENSBTAG00000000874 | CAST     | 281039    | protein-coding | 0.56327682 | 7.236706   | 38.828792  | 4.42E-07 | 0.00088869 |
| ENSBTAG00000010927 | CBFA2T3  | 523815    | protein-coding | -0.9551136 | 4.90245873 | 34.7191396 | 1.21E-06 | 0.00179167 |
| ENSBTAG00000043567 |          |           |                | -0.9343654 | 9.69991559 | 34.5259962 | 1.27E-06 | 0.00179167 |
| ENSBTAG00000001748 | TRIM45   | 539091    | protein-coding | -0.8488774 | 4.23992508 | 33.6781043 | 1.58E-06 | 0.00202283 |
| ENSBTAG00000043570 |          |           |                | -1.0750833 | 10.6998651 | 33.2937532 | 1.75E-06 | 0.00204754 |
| ENSBTAG00000022294 | FADS1    | 533107    | protein-coding | 1.0265584  | 3.28921006 | 31.8723289 | 2.53E-06 | 0.00274163 |
| ENSBTAG00000020060 | TXNIP    | 506790    | protein-coding | 0.94341066 | 10.6402975 | 30.6160055 | 3.54E-06 | 0.00298461 |
| ENSBTAG00000017567 | ACACA    | 281590    | protein-coding | 0.8341368  | 3.87684792 | 30.6040313 | 3.55E-06 | 0.00298461 |
| ENSBTAG00000014265 | SREBF2   | 507102    | protein-coding | 0.68165355 | 5.43772898 | 30.5119957 | 3.64E-06 | 0.00298461 |
| ENSBTAG00000016070 | LINGO2   | 539968    | protein-coding | -3.9863699 | -0.5669052 | 30.0950116 | 4.08E-06 | 0.00298461 |
| ENSBTAG00000013926 | FCGRT    | 338062    | protein-coding | -0.6564832 | 7.08418064 | 30.003316  | 4.18E-06 | 0.00298461 |
| ENSBTAG00000016316 | ZZEF1    | 508144    | protein-coding | 0.54433281 | 5.3755685  | 29.8475704 | 4.37E-06 | 0.00298461 |
| ENSBTAG00000032223 | COG7     | 504790    | protein-coding | 0.61891904 | 3.50092031 | 29.775482  | 4.45E-06 | 0.00298461 |
| ENSBTAG00000000172 | PFKFB1   | 282304    | protein-coding | -0.5004347 | 5.37531359 | 29.238232  | 5.16E-06 | 0.00330274 |
| ENSBTAG00000011034 | ANGPT2   | 282141    | protein-coding | -1.0985205 | 2.13647254 | 28.5407942 | 6.27E-06 | 0.00367525 |
| ENSBTAG00000007884 | SREBF1   | 539361    | protein-coding | 0.89745757 | 6.48331898 | 27.9996685 | 7.30E-06 | 0.00375312 |
| ENSBTAG00000001061 | PRKCA    | 282001    | protein-coding | 0.81372544 | 3.83184413 | 27.9956468 | 7.30E-06 | 0.00375312 |
| ENSBTAG00000012178 | NR1D1    | 768225    | protein-coding | 0.98181212 | 4.73723832 | 27.9832057 | 7.33E-06 | 0.00375312 |
| ENSBTAG00000007993 | CORO1C   | 515798    | protein-coding | -0.5292733 | 4.32832386 | 27.9178915 | 7.47E-06 | 0.00375312 |
| ENSBTAG00000017416 | KPNA4    | 535090    | protein-coding | 0.52652786 | 6.43722542 | 27.6133128 | 8.14E-06 | 0.0039348  |
| ENSBTAG00000018936 | LSS      | 615906    | protein-coding | 0.71298561 | 2.83633693 | 27.5079976 | 8.39E-06 | 0.0039348  |
| ENSBTAG00000017258 | ACSL3    | 100138312 | protein-coding | 0.77229314 | 4.73843427 | 27.3733624 | 8.71E-06 | 0.00395681 |
| ENSBTAG00000002126 | PFKFB2   | 287019    | protein-coding | -0.8526011 | 4.1299211  | 27.1955581 | 9.17E-06 | 0.00403296 |
| ENSBTAG00000000698 | MYO18B   | 540437    | protein-coding | 0.51680621 | 8.34917908 | 27.0269313 | 9.62E-06 | 0.00410441 |
| ENSBTAG00000037735 | C5AR2    | 522144    | protein-coding | 1.78825232 | 2.68082591 | 26.5490255 | 1.10E-05 | 0.0043053  |
| ENSBTAG00000003215 | KIF3B    | 508404    | protein-coding | 0.52733228 | 3.24870746 | 26.4711334 | 1.13E-05 | 0.0043053  |
| ENSBTAG00000015511 | FADS3    | 515925    | protein-coding | -0.7770949 | 4.0465563  | 26.449456  | 1.14E-05 | 0.0043053  |
| ENSBTAG00000017542 | PPARD    | 353106    | protein-coding | -1.3622515 | 4.68360399 | 26.443017  | 1.14E-05 | 0.0043053  |
| ENSBTAG00000004709 | MAPK9    | 534125    | protein-coding | 0.55277053 | 3.72541888 | 25.7649    | 1.39E-05 | 0.00476524 |
| ENSBTAG00000043979 | H1-9     | 615867    | protein-coding | -0.9283654 | 2.80727203 | 25.3361101 | 1.57E-05 | 0.00527838 |
| ENSBTAG00000016048 | CPT1B    | 509459    | protein-coding | -0.5633775 | 6.07723072 | 24.6492795 | 1.93E-05 | 0.00618163 |
| ENSBTAG00000007767 | TBX15    | 521974    | protein-coding | 0.52886668 | 6.82483376 | 24.4028952 | 2.08E-05 | 0.00641653 |
| ENSBTAG00000007246 | TMEM204  | 615464    | protein-coding | -0.7263684 | 3.83722251 | 24.3771077 | 2.10E-05 | 0.00641653 |
| ENSBTAG00000014396 | KLF10    | 522795    | protein-coding | 1.37831211 | 7.62884858 | 23.6890782 | 2.58E-05 | 0.00742018 |
| ENSBTAG00000009451 | JDP2     | 531476    | protein-coding | -0.7338472 | 2.58513589 | 23.5617115 | 2.69E-05 | 0.00746244 |

|                    |           |           |                |            |            |            |            |            |
|--------------------|-----------|-----------|----------------|------------|------------|------------|------------|------------|
| ENSBTAG00000015185 | MRGPRF    | 615886    | protein-coding | -0.6840597 | 2.31711123 | 23.5333249 | 2.71E-05   | 0.00746244 |
| ENSBTAG00000012004 | TGFB3     | 538957    | protein-coding | -1.1036339 | 2.65678485 | 23.4760578 | 2.76E-05   | 0.00746244 |
| ENSBTAG00000015202 | DMAC2L    | 493709    | protein-coding | -0.5326851 | 3.82847429 | 23.1847034 | 3.01E-05   | 0.0080069  |
| ENSBTAG00000050814 | CFAP70    | 529891    | protein-coding | -0.8738044 | 1.92829515 | 23.0545112 | 3.14E-05   | 0.00809125 |
| ENSBTAG00000007553 | KCNA5     | 508960    | protein-coding | -1.0601482 | 2.58344716 | 23.0306058 | 3.16E-05   | 0.00809125 |
| ENSBTAG00000011530 | CDH15     | 522202    | protein-coding | -0.6134909 | 4.02924144 | 22.7918752 | 3.40E-05   | 0.00848371 |
| ENSBTAG00000012504 | GAS2L1    | 518935    | protein-coding | -0.8158262 | 2.25565151 | 22.4849838 | 3.75E-05   | 0.00893143 |
| ENSBTAG00000000088 | ALCAM     | 281614    | protein-coding | 1.32245675 | 2.87227277 | 22.266171  | 4.01E-05   | 0.00918384 |
| ENSBTAG00000009679 | PLEKHG1   | 525772    | protein-coding | -0.8605992 | 3.82674798 | 22.0769087 | 4.26E-05   | 0.00936247 |
| ENSBTAG00000051572 | ZNF646    | 783820    | protein-coding | 0.51483982 | 3.34241771 | 22.076206  | 4.26E-05   | 0.00936247 |
| ENSBTAG00000012805 | TSPAN13   | 526460    | protein-coding | -0.512014  | 6.20661429 | 22.0266882 | 4.32E-05   | 0.00936322 |
| ENSBTAG00000015164 | SLC27A5   | 533016    | protein-coding | -0.9716295 | 1.41465392 | 21.8687329 | 4.54E-05   | 0.00969235 |
| ENSBTAG00000010652 | PDE4C     | 524624    | protein-coding | -0.8130089 | 5.66632179 | 21.7788198 | 4.68E-05   | 0.00982297 |
| ENSBTAG00000029906 | MIR133A-2 | 100313253 | ncRNA          | -0.8484847 | 4.54766606 | 21.5197775 | 5.08E-05   | 0.01035516 |
| ENSBTAG00000051090 | KLF13     | 789710    | protein-coding | -0.9581861 | 2.01089512 | 21.469219  | 5.16E-05   | 0.01037277 |
| ENSBTAG00000015599 | PRKD2     | 782793    | protein-coding | -0.5711914 | 4.36989469 | 21.0216475 | 5.95E-05   | 0.01180027 |
| ENSBTAG00000008350 | KLHL21    | 506632    | protein-coding | -0.6161633 | 6.37956486 | 20.8971747 | 6.20E-05   | 0.01192071 |
| ENSBTAG00000011864 |           |           |                | -0.6402114 | 3.8590172  | 20.8049094 | 6.38E-05   | 0.01192071 |
| ENSBTAG00000006832 | SLC5A6    | 516021    | protein-coding | -0.7598421 | 3.37733    | 20.7515777 | 6.49E-05   | 0.01192071 |
| ENSBTAG00000047836 | LOC785629 | 785629    | pseudo         | -0.6495887 | 2.27718264 | 20.7261186 | 6.55E-05   | 0.01192071 |
| ENSBTAG00000013406 | CSRP2     | 539381    | protein-coding | -0.8710917 | 2.20165045 | 20.7099061 | 6.58E-05   | 0.01192071 |
| ENSBTAG00000024605 | DYNLL1    | 404151    | protein-coding | -0.5901687 | 3.19108492 | 20.3161313 | 7.48E-05   | 0.0129953  |
| ENSBTAG00000024509 | TMEM52    | 617403    | protein-coding | -0.9651804 | 2.18952828 | 20.1349567 | 7.93E-05   | 0.01361888 |
| ENSBTAG00000009418 | FAM131B   | 617268    | protein-coding | -1.9164568 | 0.1056641  | 19.9907839 | 8.32E-05   | 0.01410534 |
| ENSBTAG00000027635 | PLPP5     | 616337    | protein-coding | -0.6482454 | 2.82246623 | 19.7960011 | 8.87E-05   | 0.0148588  |
| ENSBTAG00000011617 | MAMSTR    | 505540    | protein-coding | -0.9202103 | 5.28737126 | 19.5594227 | 9.59E-05   | 0.01533552 |
| ENSBTAG00000003130 | CHRNA3    | 282702    | protein-coding | 1.24667456 | 1.52878788 | 19.3773033 | 0.00010184 | 0.01610701 |
| ENSBTAG00000015980 | FASN      | 281152    | protein-coding | 1.16193952 | 5.18927207 | 19.2450339 | 0.00010642 | 0.0164616  |
| ENSBTAG00000011803 | MYH3      | 281338    | protein-coding | 0.60141853 | 6.20151445 | 18.9601576 | 0.00011705 | 0.01771601 |
| ENSBTAG00000016294 | ZNF438    | 510512    | protein-coding | 0.59723488 | 1.8868881  | 18.6508383 | 0.00012988 | 0.01904331 |
| ENSBTAG00000025942 | HPGD      | 512259    | protein-coding | -0.9407792 | 1.94850966 | 18.610419  | 0.00013166 | 0.01910581 |
| ENSBTAG00000050406 |           |           |                | -0.9436442 | 1.22196418 | 18.3046322 | 0.00014603 | 0.02055503 |
| ENSBTAG00000049358 | ZNF287    | 514947    | protein-coding | 0.54095709 | 2.4770329  | 18.2362137 | 0.00014947 | 0.02079801 |
| ENSBTAG00000012314 | LDLR      | 281276    | protein-coding | 1.19670777 | 2.66185065 | 18.0401029 | 0.0001598  | 0.02102255 |
| ENSBTAG00000004893 | ACOX3     | 510065    | protein-coding | -0.5935566 | 4.3671705  | 17.8048855 | 0.00017322 | 0.02215845 |
| ENSBTAG00000017560 | CEBPG     | 617530    | protein-coding | 0.50034488 | 3.49592912 | 17.779477  | 0.00017474 | 0.02215845 |
| ENSBTAG00000017528 | SNAI3     | 526694    | protein-coding | -1.5604398 | 2.72648565 | 17.7459328 | 0.00017676 | 0.02217799 |
| ENSBTAG00000001762 | RFXANK    | 100125917 | protein-coding | -0.5225187 | 3.74122443 | 17.7249881 | 0.00017804 | 0.02217799 |
| ENSBTAG00000052146 | MSANTD3   | 534309    | protein-coding | 0.79755163 | 1.57485374 | 17.6253516 | 0.00018426 | 0.02262449 |
| ENSBTAG00000002531 | ARHGAP10  | 510704    | protein-coding | 0.51805397 | 5.00162767 | 17.5350144 | 0.0001901  | 0.02286993 |
| ENSBTAG00000003512 | MYH7B     | 521764    | protein-coding | -0.6732295 | 7.71129595 | 17.4661107 | 0.00019468 | 0.02307321 |
| ENSBTAG00000001835 | GJA1      | 281193    | protein-coding | -0.6767206 | 2.72424799 | 17.0888496 | 0.00022195 | 0.02503165 |
| ENSBTAG00000038397 | BOLA-DRB2 | 538700    | protein-coding | 2.44291715 | -0.1292263 | 17.0413714 | 0.00022566 | 0.02503165 |

|                     |           |           |                |            |            |            |            |            |
|---------------------|-----------|-----------|----------------|------------|------------|------------|------------|------------|
| ENSBTAG00000007816  | LOC787045 | 787045    | pseudo         | -1.5020387 | 3.4291056  | 17.0233421 | 0.00022709 | 0.02503165 |
| ENSBTAG00000003049  | MICALL2   | 510644    | protein-coding | -0.5720565 | 3.48722919 | 16.9943174 | 0.0002294  | 0.02503165 |
| ENSBTAG000000043545 |           |           |                | -0.9338317 | 2.57688579 | 16.7112111 | 0.00025336 | 0.02686489 |
| ENSBTAG000000025424 | NOTCH4    | 536128    | protein-coding | -0.5638943 | 5.14049173 | 16.6718336 | 0.00025689 | 0.02692734 |
| ENSBTAG000000008854 | RFX1      | 789747    | protein-coding | -0.6322931 | 3.01719206 | 16.6568469 | 0.00025825 | 0.02692734 |
| ENSBTAG000000008921 | NEXN      | 504819    | protein-coding | 0.6393117  | 8.67976771 | 16.5993433 | 0.00026354 | 0.02727683 |
| ENSBTAG000000020829 | PTPRK     | 509657    | protein-coding | -0.5453659 | 2.91828756 | 16.5298932 | 0.00027009 | 0.0273626  |
| ENSBTAG000000006349 | EXTL1     | 511060    | protein-coding | -0.965311  | 3.96425233 | 16.4959245 | 0.00027335 | 0.0273626  |
| ENSBTAG000000025337 | MYH13     | 511687    | protein-coding | 0.60064985 | 6.96722339 | 16.4926996 | 0.00027366 | 0.0273626  |
| ENSBTAG000000018156 | KRTCAP3   | 508550    | protein-coding | -0.8331398 | 1.65161356 | 16.293486  | 0.00029369 | 0.02812755 |
| ENSBTAG000000049218 |           |           |                | -1.1016792 | 1.91725337 | 16.2752344 | 0.0002956  | 0.02812755 |
| ENSBTAG000000003120 | ZNF385B   | 613328    | protein-coding | 1.01159137 | 1.85641527 | 16.2081053 | 0.00030274 | 0.02823099 |
| ENSBTAG000000007888 | EFR3B     | 517590    | protein-coding | -0.8987772 | 1.8326351  | 16.1655415 | 0.00030736 | 0.02827749 |
| ENSBTAG000000048982 |           |           |                | -0.6177871 | 3.86743951 | 16.1093237 | 0.00031359 | 0.02847776 |
| ENSBTAG000000003541 | ZNF614    | 100137855 | protein-coding | 0.5937067  | 2.62800478 | 16.0809421 | 0.00031678 | 0.02858327 |
| ENSBTAG000000002644 | KCNQ4     | 528741    | protein-coding | -0.5626554 | 5.7925016  | 16.0524077 | 0.00032002 | 0.02869212 |
| ENSBTAG000000049453 | OR51A25   | 785036    | protein-coding | -1.9187211 | -0.1866385 | 15.9616119 | 0.00033059 | 0.02875958 |
| ENSBTAG000000018562 | LDAF1     | 784639    | protein-coding | 0.82602236 | 5.32968079 | 15.891963  | 0.00033894 | 0.0292694  |
| ENSBTAG000000021538 | MYO1E     | 523485    | protein-coding | -0.683684  | 3.97209178 | 15.7395945 | 0.00035801 | 0.03028359 |
| ENSBTAG000000012126 | PNPLA7    | 536255    | protein-coding | -0.5053372 | 2.98286663 | 15.7296579 | 0.00035929 | 0.03028359 |
| ENSBTAG000000047801 | CRELD2    | 515222    | protein-coding | -0.7718869 | 1.77290842 | 15.6968085 | 0.00036356 | 0.0304615  |
| ENSBTAG000000052213 | ADIPOQ    | 282865    | protein-coding | 2.94594398 | 1.51973568 | 15.6488527 | 0.0003699  | 0.03080916 |
| ENSBTAG000000021407 | LOC788915 | 788915    | protein-coding | -0.9891909 | 3.20872595 | 15.6238342 | 0.00037326 | 0.03090557 |
| ENSBTAG000000015343 | DYNC2I2   | 531489    | protein-coding | -0.5960553 | 2.23120486 | 15.5650607 | 0.00038126 | 0.03121392 |
| ENSBTAG000000011896 | GRIP2     | 509537    | protein-coding | -0.8146321 | 4.13042848 | 15.5135941 | 0.00038842 | 0.03142194 |
| ENSBTAG000000000658 |           |           |                | -0.6937541 | 3.21030276 | 15.4618117 | 0.00039577 | 0.03165261 |
| ENSBTAG000000003152 | IFI27     | 507138    | protein-coding | -1.2353106 | 4.69779431 | 15.397245  | 0.00040514 | 0.03221902 |
| ENSBTAG000000020289 | ZNF214    | 100140999 | protein-coding | 1.51003855 | -0.7913046 | 15.355249  | 0.00041136 | 0.03238721 |
| ENSBTAG000000027654 | EIF4EBP1  | 509613    | protein-coding | -0.5271392 | 5.33164861 | 15.3210375 | 0.00041651 | 0.03257082 |
| ENSBTAG000000018527 | HDGFL3    | 784070    | protein-coding | -0.5060757 | 3.239157   | 15.2154154 | 0.00043282 | 0.03359143 |
| ENSBTAG000000023179 | TRIB1     | 521857    | protein-coding | -0.6233215 | 5.81052352 | 15.1345552 | 0.00044578 | 0.03400561 |
| ENSBTAG000000004039 | DHX35     | 513148    | protein-coding | 0.56792531 | 2.59559779 | 15.0985001 | 0.00045168 | 0.03400561 |
| ENSBTAG000000024815 | ANKRD28   | 529062    | protein-coding | 0.50043949 | 4.46554042 | 15.0924409 | 0.00045268 | 0.03400561 |
| ENSBTAG000000012079 | MYLK4     | 518025    | protein-coding | -0.9743884 | 3.38755201 | 14.9863994 | 0.00047059 | 0.03486316 |
| ENSBTAG000000021938 | ARHGAP44  | 509257    | protein-coding | -0.8340587 | 1.93662899 | 14.9321296 | 0.00048004 | 0.03537733 |
| ENSBTAG000000014616 | SEPSECS   | 518874    | protein-coding | 0.60974445 | 2.85811339 | 14.8812588 | 0.00048909 | 0.03560313 |
| ENSBTAG000000054572 | PEG3      | 444864    | protein-coding | -0.6891016 | 3.7269962  | 14.8537508 | 0.00049405 | 0.03560313 |
| ENSBTAG000000010365 | SQOR      | 507858    | protein-coding | -0.504968  | 3.5438604  | 14.7231647 | 0.00051838 | 0.03612206 |
| ENSBTAG000000010457 | NUAK1     | 519892    | protein-coding | 0.54508037 | 2.98497029 | 14.7084584 | 0.00052119 | 0.03613952 |
| ENSBTAG000000019577 | ACKR4     | 281672    | protein-coding | -0.8931528 | 0.87882967 | 14.5878169 | 0.00054494 | 0.03705562 |
| ENSBTAG000000048771 |           |           |                | -0.7387928 | 1.75797531 | 14.541086  | 0.00055444 | 0.03718702 |
| ENSBTAG000000032869 | RNASE10   | 100140137 | protein-coding | 1.0964689  | 1.38473508 | 14.5400515 | 0.00055465 | 0.03718702 |
| ENSBTAG000000012854 | GSDMB     | 509296    | protein-coding | -0.7591873 | 1.94351893 | 14.4698896 | 0.00056926 | 0.03742637 |

|                     |           |           |                |            |            |            |            |            |
|---------------------|-----------|-----------|----------------|------------|------------|------------|------------|------------|
| ENSBTAG00000015274  | PRL       | 280901    | protein-coding | -2.0532795 | -0.6367476 | 14.4302779 | 0.00057769 | 0.03742637 |
| ENSBTAG00000013569  | CD38      | 327677    | protein-coding | -0.9117996 | 1.6931239  | 14.3913916 | 0.00058609 | 0.03749915 |
| ENSBTAG00000015490  | HS1BP3    | 526092    | protein-coding | -0.6778832 | 2.75631986 | 14.274218  | 0.00061221 | 0.03864321 |
| ENSBTAG00000000510  | ATG101    | 513049    | protein-coding | -0.6636382 | 4.64676997 | 14.2304051 | 0.00062229 | 0.03910422 |
| ENSBTAG00000008509  | SLC38A3   | 326576    | protein-coding | -0.7261662 | 1.17555339 | 14.2051119 | 0.00062819 | 0.03924106 |
| ENSBTAG00000052883  | NANOS1    | 786356    | protein-coding | 0.79754931 | 1.57933327 | 14.1579914 | 0.00063934 | 0.03924106 |
| ENSBTAG00000020745  | HIVEP3    | 509866    | protein-coding | 0.82538825 | 1.41622359 | 14.130451  | 0.00064596 | 0.03924106 |
| ENSBTAG00000025129  | MNT       | 618576    | protein-coding | -0.7716143 | 3.18886214 | 13.9879423 | 0.00068138 | 0.0404624  |
| ENSBTAG00000044185  | SOX6      | 534321    | protein-coding | 0.57685554 | 4.45175684 | 13.9772385 | 0.00068412 | 0.0404624  |
| ENSBTAG00000049862  |           |           |                | 1.66659859 | -0.6179587 | 13.829165  | 0.00072329 | 0.04207034 |
| ENSBTAG00000001592  | INSIG1    | 511899    | protein-coding | 0.72066002 | 2.89509642 | 13.7262262 | 0.00075193 | 0.04302479 |
| ENSBTAG00000011534  | RAMP1     | 617017    | protein-coding | -0.5346011 | 3.55439022 | 13.7020512 | 0.00075882 | 0.04324375 |
| ENSBTAG00000001086  | FHL2      | 510008    | protein-coding | -1.1785084 | 0.22594739 | 13.6540852 | 0.00077271 | 0.04365544 |
| ENSBTAG00000002914  | GALNT18   | 614203    | protein-coding | -0.784265  | 3.05875961 | 13.6440445 | 0.00077565 | 0.04365544 |
| ENSBTAG00000014319  | DNM3      | 506315    | protein-coding | -0.8474463 | 0.71016824 | 13.634525  | 0.00077845 | 0.04365544 |
| ENSBTAG00000053188  |           |           |                | -0.5735116 | 1.77358404 | 13.6228796 | 0.00078189 | 0.04367433 |
| ENSBTAG00000020626  | ERCC6L2   | 508357    | protein-coding | 0.50277215 | 3.28398104 | 13.5739142 | 0.00079653 | 0.04386339 |
| ENSBTAG00000021357  | ZNF518A   | 524691    | protein-coding | 0.51286249 | 3.23121921 | 13.5607462 | 0.00080052 | 0.04386339 |
| ENSBTAG00000000256  |           |           |                | -0.5727529 | 4.31768973 | 13.5576017 | 0.00080148 | 0.04386339 |
| ENSBTAG00000018204  | MYH1      | 281337    | protein-coding | 0.51292107 | 15.0968718 | 13.505309  | 0.00081754 | 0.04418419 |
| ENSBTAG00000006081  | PPM1J     | 100848925 | protein-coding | -0.5352886 | 4.93492318 | 13.4966147 | 0.00082025 | 0.04418419 |
| ENSBTAG000000005012 | HSPH1     | 507165    | protein-coding | -0.6074174 | 5.28098267 | 13.4875878 | 0.00082306 | 0.04418419 |
| ENSBTAG000000005928 | MINPP1    | 541067    | protein-coding | 0.50963669 | 3.15416506 | 13.4727237 | 0.00082773 | 0.04418419 |
| ENSBTAG00000019432  | LOC616254 | 616254    | protein-coding | -0.5121051 | 3.99156939 | 13.4262083 | 0.0008425  | 0.04475097 |
| ENSBTAG00000024407  | LOC787530 | 787530    | pseudo         | -0.5721467 | 2.92578335 | 13.3798133 | 0.00085751 | 0.04511587 |
| ENSBTAG00000043961  | MPDZ      | 536863    | protein-coding | -0.5092575 | 6.99785008 | 13.3753161 | 0.00085898 | 0.04511587 |
| ENSBTAG00000010564  | ELOVL6    | 533333    | protein-coding | 1.43170578 | 1.28516024 | 13.1961465 | 0.00091981 | 0.04674111 |
| ENSBTAG00000051791  | MIR29D    | 100313025 | ncRNA          | -0.8943442 | 0.38388725 | 13.1255059 | 0.00094504 | 0.04767902 |
| ENSBTAG00000051333  | ARID5B    | 783538    | protein-coding | -1.4129229 | 5.91096226 | 13.0922097 | 0.00095719 | 0.04796262 |
| ENSBTAG00000002858  | ACBD7     | 508284    | protein-coding | 1.37371482 | 0.29742214 | 13.0360036 | 0.00097808 | 0.04796262 |
| ENSBTAG000000005583 | HYI       | 515954    | protein-coding | -0.5485477 | 2.59283138 | 13.0286742 | 0.00098084 | 0.04796262 |
| ENSBTAG00000037794  | MYH4      | 408020    | protein-coding | 0.55750545 | 11.4082534 | 13.0074122 | 0.00098889 | 0.04796262 |
| ENSBTAG00000051936  |           |           |                | -0.6272081 | 2.89906994 | 12.9827411 | 0.00099832 | 0.04812445 |
| ENSBTAG00000048659  |           |           |                | 0.95346911 | 1.13017522 | 12.9712695 | 0.00100274 | 0.04817244 |
| ENSBTAG00000002144  | ADRB2     | 281605    | protein-coding | -0.6236252 | 4.40983118 | 12.8852977 | 0.00103652 | 0.04929051 |
| ENSBTAG00000027080  | SLC8A3    | 540307    | protein-coding | 0.5478509  | 4.95633001 | 12.8573121 | 0.00104777 | 0.04965801 |
| ENSBTAG00000009599  | LCN1      | 511158    | protein-coding | -3.4937919 | 0.41140639 | 12.819728  | 0.00106309 | 0.04997437 |
| ENSBTAG00000037526  | FABP4     | 281759    | protein-coding | 2.65514508 | 2.1718995  | 12.8148549 | 0.0010651  | 0.04997437 |

### 3. Prospected DEGs to T2 vs T1 in Conventional Weaning group

| ENSEMBL             | SYMBOL           | ENTREZID  | GENETYPE       | logFC      | logCPM     | F          | PValue   | FDR      |
|---------------------|------------------|-----------|----------------|------------|------------|------------|----------|----------|
| ENSBTAG00000002126  | <i>PFKFB2</i>    | 287019    | protein-coding | 1.66346812 | 4.1299211  | 89.7241145 | 4.85E-11 | 6.82E-07 |
| ENSBTAG000000021970 | <i>EYA4</i>      | 538786    | protein-coding | -1.329733  | 6.82448232 | 80.1049911 | 1.94E-10 | 1.14E-06 |
| ENSBTAG00000003512  | <i>MYH7B</i>     | 521764    | protein-coding | 1.50880945 | 7.71129595 | 78.5895369 | 2.44E-10 | 1.14E-06 |
| ENSBTAG000000048271 | <i>MICAL3</i>    | 532244    | protein-coding | -1.0587176 | 6.4044722  | 71.7033178 | 7.19E-10 | 2.53E-06 |
| ENSBTAG000000010786 | <i>TACC2</i>     | 533768    | protein-coding | -0.9785381 | 8.37452628 | 67.1239714 | 1.54E-09 | 4.33E-06 |
| ENSBTAG000000016411 | <i>RNF122</i>    | 510037    | protein-coding | 1.13205066 | 4.86033306 | 64.3915494 | 2.46E-09 | 5.77E-06 |
| ENSBTAG000000015543 | <i>ARHGAP35</i>  | 540310    | protein-coding | -0.8976848 | 6.83932883 | 62.5035446 | 3.43E-09 | 6.90E-06 |
| ENSBTAG000000017528 | <i>SNAI3</i>     | 526694    | protein-coding | 3.19978614 | 2.72648565 | 61.5232383 | 4.09E-09 | 7.20E-06 |
| ENSBTAG00000000698  | <i>MYO18B</i>    | 540437    | protein-coding | -0.7776952 | 8.34917908 | 57.4447858 | 8.67E-09 | 1.36E-05 |
| ENSBTAG000000043961 | <i>MPDZ</i>      | 536863    | protein-coding | 1.10301688 | 6.99785008 | 56.7397574 | 9.90E-09 | 1.39E-05 |
| ENSBTAG000000015888 | <i>PDE7B</i>     | 522509    | protein-coding | -0.8824184 | 4.07166774 | 54.6654606 | 1.47E-08 | 1.89E-05 |
| ENSBTAG000000022058 | <i>UNG</i>       | 511381    | protein-coding | -1.2356837 | 7.9015851  | 53.955633  | 1.69E-08 | 1.97E-05 |
| ENSBTAG000000031439 | <i>CDC14A</i>    | 614777    | protein-coding | -1.0750704 | 3.89863622 | 53.5938431 | 1.82E-08 | 1.97E-05 |
| ENSBTAG000000006189 | <i>ACTG1</i>     | 404122    | protein-coding | 0.75313939 | 8.2761483  | 52.6490082 | 2.19E-08 | 2.20E-05 |
| ENSBTAG000000003514 | <i>HSF4</i>      | 614788    | protein-coding | 0.9250284  | 4.74972679 | 51.8325816 | 2.58E-08 | 2.30E-05 |
| ENSBTAG000000021920 | <i>SEMA4C</i>    | 526028    | protein-coding | 0.88790628 | 4.13611933 | 51.6357375 | 2.68E-08 | 2.30E-05 |
| ENSBTAG000000007895 | <i>SLC20A1</i>   | 514255    | protein-coding | 1.49781031 | 5.69488037 | 51.0668363 | 3.01E-08 | 2.30E-05 |
| ENSBTAG000000010392 | <i>ESRRG</i>     | 536732    | protein-coding | -2.6387879 | 1.19031337 | 51.0362248 | 3.03E-08 | 2.30E-05 |
| ENSBTAG000000021294 | <i>VWAI</i>      | 505917    | protein-coding | 1.16991132 | 3.1358257  | 50.9193093 | 3.10E-08 | 2.30E-05 |
| ENSBTAG000000008921 | <i>NEXN</i>      | 504819    | protein-coding | -1.1434548 | 8.67976771 | 49.5294485 | 4.12E-08 | 2.90E-05 |
| ENSBTAG000000012854 | <i>GSDMB</i>     | 509296    | protein-coding | 1.4741565  | 1.94351893 | 49.1245449 | 4.49E-08 | 3.01E-05 |
| ENSBTAG000000032534 | <i>RHOF</i>      | 617894    | protein-coding | 0.88711866 | 4.59044253 | 48.6050971 | 5.00E-08 | 3.20E-05 |
| ENSBTAG000000037449 | <i>ACSM5</i>     | 100298888 | protein-coding | 1.04796437 | 4.93712704 | 47.9140997 | 5.78E-08 | 3.34E-05 |
| ENSBTAG000000015119 | <i>SIK3</i>      | 506539    | protein-coding | -0.8283015 | 5.50892163 | 47.6588621 | 6.10E-08 | 3.34E-05 |
| ENSBTAG000000005754 | <i>PPMIK</i>     | 540329    | protein-coding | 1.40867956 | 5.35383935 | 47.645196  | 6.12E-08 | 3.34E-05 |
| ENSBTAG000000014420 | <i>AGER</i>      | 280986    | protein-coding | 1.58197388 | 1.52424487 | 47.6056104 | 6.17E-08 | 3.34E-05 |
| ENSBTAG000000050814 | <i>CFAP70</i>    | 529891    | protein-coding | 1.40383837 | 1.92829515 | 47.2910748 | 6.59E-08 | 3.44E-05 |
| ENSBTAG000000046664 | <i>TSC22D1</i>   | 510359    | protein-coding | -0.8882267 | 5.72630658 | 47.0829405 | 6.89E-08 | 3.46E-05 |
| ENSBTAG000000001609 | <i>MAP2K6</i>    | 286883    | protein-coding | -1.077206  | 6.11989122 | 46.4006615 | 7.98E-08 | 3.87E-05 |
| ENSBTAG000000026199 | <i>ACTB</i>      | 280979    | protein-coding | 0.68748308 | 8.92285982 | 45.7757192 | 9.13E-08 | 4.28E-05 |
| ENSBTAG000000007214 | <i>ELL2</i>      | 782605    | protein-coding | 1.56485488 | 4.19328693 | 45.2825428 | 1.02E-07 | 4.55E-05 |
| ENSBTAG000000020457 | <i>TGFB1</i>     | 282089    | protein-coding | 0.98406842 | 3.49158712 | 45.2015556 | 1.03E-07 | 4.55E-05 |
| ENSBTAG000000005857 | <i>SLC6A1</i>    | 407118    | protein-coding | 1.3199162  | 4.86457922 | 44.9423416 | 1.09E-07 | 4.67E-05 |
| ENSBTAG000000021134 | <i>DPP9</i>      | 521100    | protein-coding | -0.5578257 | 5.12847709 | 44.6476449 | 1.17E-07 | 4.82E-05 |
| ENSBTAG000000043979 | <i>H1-9</i>      | 615867    | protein-coding | 1.3331957  | 2.80727203 | 44.5320355 | 1.20E-07 | 4.82E-05 |
| ENSBTAG000000001143 | <i>LOC512486</i> | 512486    | protein-coding | 1.47475751 | 4.09341919 | 44.3587456 | 1.24E-07 | 4.86E-05 |
| ENSBTAG000000016220 | <i>WIPF3</i>     | 786606    | protein-coding | -0.973471  | 4.21942509 | 43.8018027 | 1.41E-07 | 5.35E-05 |
| ENSBTAG000000037735 | <i>C5AR2</i>     | 522144    | protein-coding | -2.3537189 | 2.68082591 | 43.4833822 | 1.51E-07 | 5.60E-05 |
| ENSBTAG000000051572 | <i>ZNF646</i>    | 783820    | protein-coding | -0.7340699 | 3.34241771 | 42.8575285 | 1.74E-07 | 6.28E-05 |
| ENSBTAG000000051759 |                  |           |                | -0.6901826 | 4.09858522 | 42.2229596 | 2.01E-07 | 7.06E-05 |
| ENSBTAG000000020658 | <i>LNX1</i>      | 540694    | protein-coding | -1.18291   | 2.5475883  | 40.6908996 | 2.85E-07 | 9.79E-05 |

|                    |                  |           |                |            |            |            |          |            |
|--------------------|------------------|-----------|----------------|------------|------------|------------|----------|------------|
| ENSBTAG00000052248 |                  |           |                | -1.4874289 | 2.17192557 | 40.4808621 | 3.00E-07 | 0.00010039 |
| ENSBTAG00000008509 | <i>SLC38A3</i>   | 326576    | protein-coding | 1.31547877 | 1.17555339 | 40.3357969 | 3.10E-07 | 0.00010043 |
| ENSBTAG00000018770 | <i>HSDL1</i>     | 505213    | protein-coding | 0.88184347 | 2.2021102  | 40.1761556 | 3.22E-07 | 0.00010043 |
| ENSBTAG00000010543 | <i>FGFR4</i>     | 317696    | protein-coding | 1.0882867  | 3.39138072 | 40.1598712 | 3.23E-07 | 0.00010043 |
| ENSBTAG00000001027 | <i>SERPINH1</i>  | 510850    | protein-coding | 0.94265512 | 6.48306976 | 40.0894426 | 3.28E-07 | 0.00010043 |
| ENSBTAG00000046282 | <i>VGLL2</i>     | 541260    | protein-coding | 1.24102421 | 6.47862384 | 39.9448072 | 3.40E-07 | 0.00010168 |
| ENSBTAG00000015511 | <i>FADS3</i>     | 515925    | protein-coding | 0.97586287 | 4.0465563  | 38.942245  | 4.30E-07 | 0.00012357 |
| ENSBTAG00000018238 | <i>ABTB1</i>     | 507417    | protein-coding | 0.67506839 | 5.03545884 | 38.2739002 | 5.05E-07 | 0.00013962 |
| ENSBTAG00000011896 | <i>GRIP2</i>     | 509537    | protein-coding | 1.34368397 | 4.13042848 | 38.2595031 | 5.06E-07 | 0.00013962 |
| ENSBTAG00000051791 | <i>MIR29D</i>    | 100313025 | ncRNA          | 1.66275004 | 0.38388725 | 38.1830489 | 5.16E-07 | 0.00013962 |
| ENSBTAG00000018562 | <i>LDAF1</i>     | 784639    | protein-coding | -1.2854062 | 5.32968079 | 37.1267435 | 6.66E-07 | 0.0001705  |
| ENSBTAG00000019302 | <i>BCL2</i>      | 281020    | protein-coding | -1.3865576 | 2.14262997 | 37.0337342 | 6.82E-07 | 0.00017131 |
| ENSBTAG00000015599 | <i>PRKD2</i>     | 782793    | protein-coding | 0.80959272 | 4.36989469 | 36.6732013 | 7.44E-07 | 0.00018385 |
| ENSBTAG00000014215 | <i>CCDC86</i>    | 540913    | protein-coding | -0.9135105 | 3.39966444 | 36.3769128 | 8.01E-07 | 0.00019436 |
| ENSBTAG00000025129 | <i>MNT</i>       | 618576    | protein-coding | 1.26978341 | 3.18886214 | 36.1329493 | 8.51E-07 | 0.00020295 |
| ENSBTAG00000015580 | <i>TLE3</i>      | 514326    | protein-coding | 0.981724   | 3.5147095  | 35.9723858 | 8.85E-07 | 0.00020768 |
| ENSBTAG00000009050 | <i>ADIPOR2</i>   | 407234    | protein-coding | -0.9701998 | 6.01592529 | 35.8932494 | 9.03E-07 | 0.00020833 |
| ENSBTAG00000044202 | <i>CNKSR2</i>    | 534112    | protein-coding | -0.9621799 | 3.71216559 | 35.6546383 | 9.58E-07 | 0.00021539 |
| ENSBTAG00000001762 | <i>RFXANK</i>    | 100125917 | protein-coding | 0.76512315 | 3.74122443 | 35.6231878 | 9.66E-07 | 0.00021539 |
| ENSBTAG00000012861 | <i>KIF4A</i>     | 537127    | protein-coding | 1.24913546 | 2.63058813 | 35.5669736 | 9.79E-07 | 0.00021539 |
| ENSBTAG00000036363 | <i>MIR133A-1</i> | 100313361 | ncRNA          | 1.62305847 | 1.47350077 | 35.4537561 | 1.01E-06 | 0.00021597 |
| ENSBTAG00000008688 | <i>HEYL</i>      | 538609    | protein-coding | 0.75469759 | 5.19982095 | 35.3941873 | 1.02E-06 | 0.00021597 |
| ENSBTAG00000016532 | <i>MAPKAPK3</i>  | 615215    | protein-coding | -0.5751995 | 5.59402952 | 35.3730765 | 1.03E-06 | 0.00021597 |
| ENSBTAG00000015509 | <i>NAMPT</i>     | 520472    | protein-coding | -1.2630636 | 6.65944432 | 35.2376628 | 1.06E-06 | 0.00021883 |
| ENSBTAG00000000172 | <i>PFKFB1</i>    | 282304    | protein-coding | 0.59485085 | 5.37531359 | 35.2033716 | 1.07E-06 | 0.00021883 |
| ENSBTAG00000009579 | <i>CEP85</i>     | 517520    | protein-coding | -0.860725  | 6.36001922 | 34.6124913 | 1.25E-06 | 0.00024477 |
| ENSBTAG00000008940 | <i>NPTX1</i>     | 513538    | protein-coding | -2.5216339 | 2.238817   | 34.60096   | 1.25E-06 | 0.00024477 |
| ENSBTAG00000020736 | <i>CD40</i>      | 286849    | protein-coding | 1.59817787 | 1.59892572 | 34.5909606 | 1.25E-06 | 0.00024477 |
| ENSBTAG00000053346 | <i>SPSB2</i>     | 613651    | protein-coding | 0.86180516 | 3.5438641  | 34.4270868 | 1.31E-06 | 0.00025168 |
| ENSBTAG00000008348 | <i>NOL4L</i>     | 785034    | protein-coding | 1.2179769  | 2.48798346 | 34.2743373 | 1.36E-06 | 0.00025716 |
| ENSBTAG00000002271 | <i>CDADC1</i>    | 512184    | protein-coding | -0.615911  | 4.76604252 | 34.2363942 | 1.37E-06 | 0.00025716 |
| ENSBTAG00000020944 | <i>PIEZO1</i>    | 789183    | protein-coding | 0.64164212 | 5.35326695 | 33.8385175 | 1.52E-06 | 0.00028096 |
| ENSBTAG00000017597 | <i>ESCO1</i>     | 535035    | protein-coding | -0.6583404 | 4.40303912 | 33.3178411 | 1.73E-06 | 0.00031305 |
| ENSBTAG00000032996 | <i>P4HA1</i>     | 518288    | protein-coding | 0.55293508 | 4.79769172 | 33.2403693 | 1.77E-06 | 0.00031535 |
| ENSBTAG00000002315 | <i>RNF34</i>     | 506764    | protein-coding | -0.520975  | 5.27007697 | 33.1374691 | 1.82E-06 | 0.00031982 |
| ENSBTAG00000001851 | <i>LOC508916</i> | 508916    | protein-coding | 2.33450697 | 2.41501041 | 32.9837087 | 1.89E-06 | 0.00032874 |
| ENSBTAG00000025372 | <i>RIOX1</i>     | 511031    | protein-coding | -0.6831767 | 2.53621325 | 32.7045057 | 2.03E-06 | 0.00034924 |
| ENSBTAG00000019061 | <i>ELF4</i>      | 504514    | protein-coding | 0.95312986 | 3.58320498 | 32.4364752 | 2.18E-06 | 0.00037011 |
| ENSBTAG00000008411 | <i>PLEKHO2</i>   | 613696    | protein-coding | 0.66295141 | 3.69697939 | 32.0305009 | 2.43E-06 | 0.00040214 |
| ENSBTAG00000006960 | <i>DHX16</i>     | 506405    | protein-coding | -0.5039179 | 4.70226688 | 31.9640849 | 2.47E-06 | 0.00040394 |
| ENSBTAG00000014151 | <i>RCSD1</i>     | 512205    | protein-coding | 0.63780309 | 6.41129436 | 31.9255439 | 2.50E-06 | 0.00040394 |
| ENSBTAG00000013666 | <i>SLC25A29</i>  | 507686    | protein-coding | 0.91030545 | 3.0706802  | 31.8245471 | 2.56E-06 | 0.00041017 |
| ENSBTAG00000013855 | <i>ORMDL3</i>    | 615368    | protein-coding | 0.62124953 | 4.99591042 | 31.3798958 | 2.89E-06 | 0.00045644 |

|                     |                                    |           |                |            |            |            |          |            |
|---------------------|------------------------------------|-----------|----------------|------------|------------|------------|----------|------------|
| ENSBTAG00000046337  | <i>TUBB6</i>                       | 534206    | protein-coding | 1.01996415 | 4.0969528  | 31.222134  | 3.01E-06 | 0.0004708  |
| ENSBTAG00000018352  | <i>ABRA</i>                        | 539379    | protein-coding | 1.24865039 | 5.00194902 | 31.0982454 | 3.11E-06 | 0.00047483 |
| ENSBTAG00000002527  | <i>ZSWIM4</i>                      | 781514    | protein-coding | -1.1126854 | 2.89742256 | 31.0649042 | 3.14E-06 | 0.00047483 |
| ENSBTAG00000019315  | <i>PLA2G7</i>                      | 282311    | protein-coding | -1.1660494 | 3.71616605 | 31.0223275 | 3.18E-06 | 0.00047483 |
| ENSBTAG00000018663  | <i>GPRC5C</i>                      | 535664    | protein-coding | 0.69863758 | 5.88936435 | 30.989818  | 3.20E-06 | 0.00047483 |
| ENSBTAG00000007767  | <i>TBX15</i>                       | 521974    | protein-coding | -0.6128449 | 6.82483376 | 30.9885116 | 3.20E-06 | 0.00047483 |
| ENSBTAG00000004553  | <i>TPM4</i>                        | 535277    | protein-coding | 0.90099937 | 6.19028934 | 30.9363479 | 3.25E-06 | 0.00047651 |
| ENSBTAG00000014724  | <i>EIF4A2</i>                      | 286819    | protein-coding | -0.5375516 | 8.79584183 | 30.6844451 | 3.48E-06 | 0.00049955 |
| ENSBTAG00000002321  | <i>AMT</i>                         | 280719    | protein-coding | 0.6249744  | 4.52500815 | 30.3543612 | 3.80E-06 | 0.00053528 |
| ENSBTAG00000014782  | <i>STAB1</i>                       | 505543    | protein-coding | 0.86597536 | 4.32708212 | 30.2533029 | 3.91E-06 | 0.00053963 |
| ENSBTAG00000011034  | <i>ANGPT2</i>                      | 282141    | protein-coding | 1.15126387 | 2.13647254 | 30.251594  | 3.91E-06 | 0.00053963 |
| ENSBTAG00000052678  | <i>MIR29C</i>                      | 791043    | ncRNA          | 1.4115451  | 1.60037987 | 30.0634885 | 4.12E-06 | 0.00056246 |
| ENSBTAG00000003510  | <i>MMRN2</i>                       | 512308    | protein-coding | 0.85431139 | 4.47623494 | 29.8956438 | 4.31E-06 | 0.0005794  |
| ENSBTAG00000003721  | <i>CHST1</i>                       | 506932    | protein-coding | 0.89493255 | 3.43501149 | 29.8843545 | 4.32E-06 | 0.0005794  |
| ENSBTAG00000003876  | <i>MCU</i>                         | 536656    | protein-coding | -0.6450128 | 5.38453111 | 29.7490673 | 4.49E-06 | 0.00059558 |
| ENSBTAG00000048659  |                                    |           |                | -1.487631  | 1.13017522 | 29.7055088 | 4.54E-06 | 0.00059711 |
| ENSBTAG00000018603  | <i>RGMA</i>                        | 518756    | protein-coding | 0.83314516 | 3.92513225 | 29.5733172 | 4.71E-06 | 0.00061344 |
| ENSBTAG00000019585  | <i>MYOM1</i>                       | 538404    | protein-coding | -0.5141212 | 10.3223038 | 29.3978971 | 4.94E-06 | 0.00063354 |
| ENSBTAG00000017860  | <i>HIPK2</i>                       | 510158    | protein-coding | -1.1197403 | 3.58659217 | 29.3595659 | 4.99E-06 | 0.00063354 |
| ENSBTAG00000018975  | <i>KCNT1</i>                       | 529468    | protein-coding | 0.74858425 | 3.80232538 | 29.3566566 | 5.00E-06 | 0.00063354 |
| ENSBTAG00000020060  | <i>TXNIP</i>                       | 506790    | protein-coding | -0.9296964 | 10.6402975 | 28.6046083 | 6.16E-06 | 0.0007733  |
| ENSBTAG00000003215  | <i>KIF3B</i>                       | 508404    | protein-coding | -0.5635884 | 3.24870746 | 28.4605358 | 6.41E-06 | 0.00079131 |
| ENSBTAG00000015839  | <i>MAP4</i>                        | 281295    | protein-coding | -0.5602146 | 9.36785856 | 28.3624641 | 6.59E-06 | 0.00080629 |
| ENSBTAG00000037729  | <i>CERS1</i>                       | 615296    | protein-coding | 0.60819133 | 3.00000023 | 28.286613  | 6.73E-06 | 0.00081654 |
| ENSBTAG000000051239 |                                    |           |                | 0.55076996 | 5.34565346 | 28.2471069 | 6.80E-06 | 0.00081859 |
| ENSBTAG00000019604  | <i>VASP</i>                        | 514902    | protein-coding | 0.5923565  | 4.3872949  | 28.086328  | 7.12E-06 | 0.00084388 |
| ENSBTAG00000012450  | <i>RAPGEF2</i>                     | 100139484 | protein-coding | -0.8733091 | 6.00635017 | 28.078813  | 7.13E-06 | 0.00084388 |
| ENSBTAG00000012172  | <i>MIDN</i>                        | 523615    | protein-coding | 1.17129181 | 5.0338681  | 28.0482118 | 7.20E-06 | 0.00084409 |
| ENSBTAG00000014508  | <i>FBXO40</i>                      | 613597    | protein-coding | -1.1114037 | 7.54329817 | 27.8895341 | 7.53E-06 | 0.00087548 |
| ENSBTAG00000003885  | <i>PEX2</i>                        | 512677    | protein-coding | -0.6706478 | 2.97822877 | 27.7849183 | 7.75E-06 | 0.00088641 |
| ENSBTAG00000015698  | <i>FYCO1</i>                       | 100139246 | protein-coding | -0.5683737 | 7.42253838 | 27.7301997 | 7.87E-06 | 0.00088641 |
| ENSBTAG00000012370  | <i>MGP</i>                         | 282660    | protein-coding | -0.8373798 | 5.65136816 | 27.7031443 | 7.93E-06 | 0.00088641 |
| ENSBTAG00000018114  | <i>ACVR2A</i>                      | 281598    | protein-coding | -0.5539023 | 4.24008406 | 27.6609325 | 8.03E-06 | 0.00088994 |
| ENSBTAG00000040206  | <i>ZNF770</i>                      | 786537    | protein-coding | -0.6022032 | 4.32149864 | 27.532392  | 8.33E-06 | 0.00090551 |
| ENSBTAG00000005666  | <i>LRRC20</i>                      | 521721    | protein-coding | 0.58246894 | 5.98310186 | 27.517188  | 8.36E-06 | 0.00090551 |
| ENSBTAG00000012302  | <i>RTN4RL1</i>                     | 539358    | protein-coding | 1.33558157 | 2.0175335  | 27.5003028 | 8.40E-06 | 0.00090551 |
| ENSBTAG00000014479  | <i>TUBGCP4</i>                     | 510865    | protein-coding | -0.6377373 | 3.28378436 | 27.4908344 | 8.43E-06 | 0.00090551 |
| ENSBTAG00000011467  | <i>BATF2</i><br><i>LOC10033745</i> | 522469    | protein-coding | 1.51944616 | 2.33919754 | 27.3974628 | 8.65E-06 | 0.00092288 |
| ENSBTAG00000047605  | <i>7</i>                           | 100337457 | protein-coding | -0.9783935 | 4.24304455 | 27.3673737 | 8.73E-06 | 0.00092384 |
| ENSBTAG00000052909  | <i>C8G</i>                         | 517356    | protein-coding | 0.7118863  | 3.42797568 | 27.3005401 | 8.90E-06 | 0.00093461 |
| ENSBTAG00000019805  | <i>RHBDF1</i>                      | 529167    | protein-coding | 0.75930078 | 4.49216785 | 27.2410133 | 9.05E-06 | 0.00094361 |
| ENSBTAG00000000053  | <i>FILIP1</i>                      | 514193    | protein-coding | -0.7973362 | 6.01615451 | 27.1282013 | 9.35E-06 | 0.00096478 |
| ENSBTAG00000039190  | <i>SLC9A5</i>                      | 512686    | protein-coding | 1.21116334 | 5.27380074 | 27.0834272 | 9.47E-06 | 0.00096478 |



|                    |                  |           |                |            |            |            |          |            |
|--------------------|------------------|-----------|----------------|------------|------------|------------|----------|------------|
| ENSBTAG00000016282 | <i>EIF5</i>      | 504752    | protein-coding | -0.595405  | 8.18958866 | 27.080076  | 9.48E-06 | 0.00096478 |
| ENSBTAG00000018823 | <i>GRN</i>       | 767942    | protein-coding | 0.60077546 | 5.04166258 | 27.0548539 | 9.55E-06 | 0.00096478 |
| ENSBTAG00000018156 | <i>KRTCAP3</i>   | 508550    | protein-coding | 1.15277756 | 1.65161356 | 27.0197439 | 9.64E-06 | 0.00096478 |
| ENSBTAG00000025494 | <i>PAQR8</i>     | 531018    | protein-coding | -1.0687848 | 1.98609242 | 26.9856874 | 9.74E-06 | 0.00096478 |
| ENSBTAG00000006870 | <i>RASGEF1A</i>  | 514877    | protein-coding | 1.19825541 | 1.77533818 | 26.9583287 | 9.81E-06 | 0.00096478 |
| ENSBTAG00000010637 | <i>ARSG</i>      | 513067    | protein-coding | -1.6026112 | 2.75580936 | 26.9555713 | 9.82E-06 | 0.00096478 |
| ENSBTAG00000038316 | <i>GPATCH8</i>   | 534759    | protein-coding | 0.57155829 | 6.58935871 | 26.9385395 | 9.87E-06 | 0.00096478 |
| ENSBTAG00000009183 | <i>SHISA5</i>    | 616861    | protein-coding | 0.68830315 | 4.00963183 | 26.8777643 | 1.00E-05 | 0.00097503 |
| ENSBTAG00000017071 | <i>CIQTNF3</i>   | 531659    | protein-coding | 0.92231051 | 4.53285159 | 26.7908699 | 1.03E-05 | 0.00099289 |
| ENSBTAG00000050314 |                  |           |                | 1.73552821 | 0.5728727  | 26.7500205 | 1.04E-05 | 0.00099782 |
| ENSBTAG00000051340 |                  |           |                | -2.5719316 | 1.24945426 | 26.6095927 | 1.09E-05 | 0.00102518 |
| ENSBTAG00000002402 | <i>IGF2R</i>     | 281849    | protein-coding | -0.7461911 | 7.03267572 | 26.5717101 | 1.10E-05 | 0.00102956 |
| ENSBTAG00000009042 | <i>ATXN7L2</i>   | 541097    | protein-coding | 0.88523136 | 3.91236319 | 26.472816  | 1.13E-05 | 0.00104631 |
| ENSBTAG00000009679 | <i>PLEKHG1</i>   | 525772    | protein-coding | 0.99068494 | 3.82674798 | 26.4702585 | 1.13E-05 | 0.00104631 |
| ENSBTAG00000005259 | <i>UCP3</i>      | 281563    | protein-coding | -1.5359258 | 8.34374545 | 26.4142258 | 1.15E-05 | 0.0010565  |
| ENSBTAG00000005408 | <i>CLK1</i>      | 613808    | protein-coding | 0.50378614 | 7.11612677 | 26.3615621 | 1.17E-05 | 0.00106016 |
| ENSBTAG00000004039 | <i>DHX35</i>     | 513148    | protein-coding | -0.7533174 | 2.59559779 | 26.3575804 | 1.17E-05 | 0.00106016 |
| ENSBTAG00000019327 | <i>NRAP</i>      | 532640    | protein-coding | -0.9917438 | 10.778737  | 26.2872875 | 1.19E-05 | 0.00106705 |
| ENSBTAG00000025898 | <i>TBC1D8</i>    | 527162    | protein-coding | -0.7168983 | 3.82474485 | 26.2837925 | 1.19E-05 | 0.00106705 |
| ENSBTAG00000000111 | <i>UGP2</i>      | 281565    | protein-coding | -0.7098667 | 7.98697257 | 26.0952792 | 1.26E-05 | 0.00111551 |
| ENSBTAG00000001576 | <i>TMEM140</i>   | 515475    | protein-coding | -0.9669927 | 4.55723336 | 26.0333047 | 1.28E-05 | 0.00112878 |
| ENSBTAG00000005847 | <i>ROCK2</i>     | 282041    | protein-coding | -1.1086925 | 7.71001158 | 26.0118035 | 1.29E-05 | 0.00112884 |
| ENSBTAG00000015345 | <i>BNIP1</i>     | 614493    | protein-coding | 1.70686025 | 0.19100621 | 25.9255465 | 1.32E-05 | 0.00115054 |
| ENSBTAG00000018838 | <i>IQCA1L</i>    | 101903592 | protein-coding | 1.91847    | 3.93250363 | 25.8758862 | 1.34E-05 | 0.00115316 |
| ENSBTAG00000029906 | <i>MIR133A-2</i> | 100313253 | ncRNA          | 0.97816031 | 4.54766606 | 25.8416813 | 1.36E-05 | 0.00115772 |
| ENSBTAG00000035844 | <i>PLAAT1</i>    | 540539    | protein-coding | 0.51428626 | 5.98718757 | 25.820394  | 1.37E-05 | 0.00115795 |
| ENSBTAG00000001865 | <i>SGCG</i>      | 506155    | protein-coding | 0.92151034 | 6.34002917 | 25.7565419 | 1.39E-05 | 0.00117278 |
| ENSBTAG00000023745 | <i>BANP</i>      | 513446    | protein-coding | 0.60923907 | 3.6340194  | 25.5473283 | 1.48E-05 | 0.00121976 |
| ENSBTAG00000010191 | <i>PAK1</i>      | 533729    | protein-coding | 0.74724105 | 4.80209477 | 25.5447765 | 1.48E-05 | 0.00121976 |
| ENSBTAG00000012605 | <i>GPR157</i>    | 538468    | protein-coding | 1.22327654 | 3.43286632 | 25.5425754 | 1.48E-05 | 0.00121976 |
| ENSBTAG00000003209 | <i>BLCAP</i>     | 281649    | protein-coding | 0.50997637 | 6.60015165 | 25.4631335 | 1.52E-05 | 0.00122098 |
| ENSBTAG00000054434 |                  |           |                | -0.9087144 | 1.80328314 | 25.4519164 | 1.52E-05 | 0.00122098 |
| ENSBTAG00000001987 | <i>SWAP70</i>    | 533720    | protein-coding | 0.59368513 | 4.17210985 | 25.4426632 | 1.53E-05 | 0.00122098 |
| ENSBTAG00000013306 | <i>ZBTB7C</i>    | 614110    | protein-coding | 0.94667431 | 1.85832752 | 25.4414931 | 1.53E-05 | 0.00122098 |
| ENSBTAG00000036297 | <i>RBFA</i>      | 510927    | protein-coding | -0.6375721 | 3.07591559 | 25.327498  | 1.58E-05 | 0.00124614 |
| ENSBTAG00000018307 | <i>SEMA3F</i>    | 531141    | protein-coding | 0.63454092 | 3.37226012 | 25.3153442 | 1.58E-05 | 0.00124614 |
| ENSBTAG00000015596 | <i>SLCO2B1</i>   | 317704    | protein-coding | 0.69249758 | 4.47735896 | 25.2953436 | 1.59E-05 | 0.00124657 |
| ENSBTAG00000006370 | <i>CCT3</i>      | 504735    | protein-coding | -0.5097758 | 6.44522562 | 25.1618019 | 1.66E-05 | 0.00128266 |
| ENSBTAG00000001823 | <i>STC2</i>      | 540573    | protein-coding | 3.23498363 | 0.40207964 | 25.039651  | 1.72E-05 | 0.00129999 |
| ENSBTAG00000025458 | <i>DPF3</i>      | 787359    | protein-coding | -0.9408093 | 2.72668686 | 25.0090251 | 1.74E-05 | 0.00129999 |
| ENSBTAG00000017616 | <i>ADSSI</i>     | 784089    | protein-coding | 0.50193831 | 8.05901062 | 24.9702928 | 1.76E-05 | 0.00130752 |
| ENSBTAG00000050008 |                  |           |                | 0.64733156 | 4.7384194  | 24.914391  | 1.79E-05 | 0.00132249 |
| ENSBTAG00000032055 | <i>VPS39</i>     | 520990    | protein-coding | -0.5110998 | 4.49728044 | 24.8538357 | 1.82E-05 | 0.00133954 |

|                    |                  |           |                |            |            |            |          |            |
|--------------------|------------------|-----------|----------------|------------|------------|------------|----------|------------|
| ENSBTAG00000022799 | <i>NOTCH1</i>    | 767866    | protein-coding | 0.7471118  | 5.55997429 | 24.7890579 | 1.85E-05 | 0.00134459 |
| ENSBTAG00000012504 | <i>GAS2L1</i>    | 518935    | protein-coding | 0.87560419 | 2.25565151 | 24.7526406 | 1.87E-05 | 0.00135234 |
| ENSBTAG00000023472 | <i>PPP1R14A</i>  | 615348    | protein-coding | -0.9621832 | 2.19380515 | 24.7288655 | 1.89E-05 | 0.00135442 |
| ENSBTAG00000021505 | <i>USP36</i>     | 504581    | protein-coding | -0.5930246 | 3.54361593 | 24.7052917 | 1.90E-05 | 0.00135442 |
| ENSBTAG00000054931 | <i>CACNG4</i>    | 519331    | protein-coding | 1.16336649 | 3.58805924 | 24.6964651 | 1.91E-05 | 0.00135442 |
| ENSBTAG00000048140 | <i>DNAAF5</i>    | 100300875 | protein-coding | -0.5145969 | 3.74604032 | 24.5285235 | 2.00E-05 | 0.0014172  |
| ENSBTAG00000009703 | <i>MYH7</i>      | 282714    | protein-coding | -0.7036243 | 12.6664818 | 24.4472076 | 2.05E-05 | 0.00143781 |
| ENSBTAG00000012720 | <i>ANKRD2</i>    | 100847218 | protein-coding | -1.7281639 | 6.61374099 | 24.406986  | 2.08E-05 | 0.00144002 |
| ENSBTAG00000023445 | <i>SIAH2</i>     | 785659    | protein-coding | 0.5351026  | 4.29739413 | 24.4055164 | 2.08E-05 | 0.00144002 |
| ENSBTAG00000000312 | <i>GRINA</i>     | 510225    | protein-coding | 0.5235859  | 4.17845577 | 24.3904867 | 2.09E-05 | 0.00144002 |
| ENSBTAG00000007782 | <i>MYOT</i>      | 507884    | protein-coding | -0.5972156 | 11.4351307 | 24.3766032 | 2.10E-05 | 0.00144002 |
| ENSBTAG00000014081 | <i>NBAS</i>      | 521982    | protein-coding | -0.5652412 | 4.19263875 | 24.3502562 | 2.11E-05 | 0.00144373 |
| ENSBTAG00000012147 | <i>ARRDC1</i>    | 786098    | protein-coding | 0.81499236 | 3.32233375 | 24.3235578 | 2.13E-05 | 0.00144373 |
| ENSBTAG00000016593 | <i>FMNL3</i>     | 540105    | protein-coding | 0.61311114 | 4.15596051 | 24.3198435 | 2.13E-05 | 0.00144373 |
| ENSBTAG00000009903 | <i>PTCH1</i>     | 520994    | protein-coding | -0.5888013 | 3.49023292 | 24.2671135 | 2.17E-05 | 0.00145986 |
| ENSBTAG00000005967 | <i>UBR2</i>      | 527153    | protein-coding | -0.5362523 | 6.96046734 | 24.1887612 | 2.22E-05 | 0.00148769 |
| ENSBTAG00000053952 |                  |           |                | -1.1844687 | 3.40408693 | 24.1038688 | 2.28E-05 | 0.00151218 |
| ENSBTAG00000020030 | <i>FITM2</i>     | 518159    | protein-coding | -0.7839278 | 4.86539871 | 24.1034199 | 2.28E-05 | 0.00151218 |
| ENSBTAG00000044150 | <i>UCK2</i>      | 541028    | protein-coding | -1.08241   | 1.34428754 | 23.8877332 | 2.43E-05 | 0.00159187 |
| ENSBTAG00000021407 | <i>LOC788915</i> | 788915    | protein-coding | 1.32274111 | 3.20872595 | 23.6810215 | 2.59E-05 | 0.00167379 |
| ENSBTAG00000025848 | <i>RBM3</i>      | 509771    | protein-coding | 0.64612675 | 5.12694798 | 23.6773932 | 2.59E-05 | 0.00167379 |
| ENSBTAG00000002869 | <i>ARL4A</i>     | 767906    | protein-coding | 0.71348783 | 3.40494112 | 23.6427181 | 2.62E-05 | 0.00168114 |
| ENSBTAG00000031950 | <i>RAB3IP</i>    | 533284    | protein-coding | 0.80513898 | 2.29162741 | 23.6282664 | 2.63E-05 | 0.00168114 |
| ENSBTAG00000011617 | <i>MAMSTR</i>    | 505540    | protein-coding | 1.06841295 | 5.28737126 | 23.6182641 | 2.64E-05 | 0.00168114 |
| ENSBTAG00000011224 | <i>CITED2</i>    | 521378    | protein-coding | -0.8711487 | 4.28860316 | 23.5261444 | 2.71E-05 | 0.00172137 |
| ENSBTAG00000002145 | <i>MMP17</i>     | 513072    | protein-coding | 1.53193069 | 0.38122602 | 23.5019163 | 2.74E-05 | 0.0017264  |
| ENSBTAG00000002382 | <i>DDX10</i>     | 528483    | protein-coding | -0.7189886 | 1.93088253 | 23.3786903 | 2.84E-05 | 0.00176125 |
| ENSBTAG00000008010 | <i>FLCN</i>      | 526652    | protein-coding | 0.76792439 | 4.53967829 | 23.3192853 | 2.89E-05 | 0.00178579 |
| ENSBTAG00000002216 | <i>MYOD1</i>     | 281938    | protein-coding | 1.20768264 | 4.97894654 | 23.152757  | 3.04E-05 | 0.0018543  |
| ENSBTAG00000002566 | <i>PGPEP1</i>    | 615089    | protein-coding | 0.62398414 | 4.39529601 | 23.1495195 | 3.05E-05 | 0.0018543  |
| ENSBTAG00000019091 | <i>RNPC3</i>     | 768060    | protein-coding | 0.54891112 | 4.43856048 | 23.0320164 | 3.16E-05 | 0.00188896 |
| ENSBTAG00000012004 | <i>TGFB3</i>     | 538957    | protein-coding | 1.16644722 | 2.65678485 | 23.018054  | 3.17E-05 | 0.00188896 |
| ENSBTAG00000031231 | <i>IRF1</i>      | 789216    | protein-coding | 0.90195358 | 5.05933373 | 23.0112795 | 3.18E-05 | 0.00188896 |
| ENSBTAG00000017666 | <i>ABCC5</i>     | 511769    | protein-coding | 0.8312507  | 6.71263389 | 22.9627375 | 3.23E-05 | 0.00190946 |
| ENSBTAG00000017743 | <i>XIRP2</i>     | 506090    | protein-coding | -1.2026779 | 11.272415  | 22.9170728 | 3.27E-05 | 0.00192049 |
| ENSBTAG00000006671 | <i>DDX27</i>     | 514567    | protein-coding | -0.5179752 | 4.06137807 | 22.8928864 | 3.30E-05 | 0.00192689 |
| ENSBTAG00000022084 |                  |           |                | -0.657891  | 2.53624098 | 22.8374115 | 3.36E-05 | 0.00194416 |
| ENSBTAG00000010284 | <i>ETNPPL</i>    | 515186    | protein-coding | 0.58152208 | 5.90488622 | 22.7697653 | 3.43E-05 | 0.00196918 |
| ENSBTAG00000012969 | <i>DDK2</i>      | 541161    | protein-coding | 1.16487716 | 1.69430926 | 22.707785  | 3.49E-05 | 0.00199929 |
| ENSBTAG00000013744 | <i>SYNPO</i>     | 533531    | protein-coding | -0.5146019 | 10.5826683 | 22.6484123 | 3.56E-05 | 0.0020283  |
| ENSBTAG00000049747 |                  |           |                | 1.37260341 | 2.32422844 | 22.617155  | 3.59E-05 | 0.00203986 |
| ENSBTAG00000004732 | <i>SPTB</i>      | 527711    | protein-coding | -0.6714702 | 7.89725762 | 22.5037266 | 3.72E-05 | 0.00210477 |
| ENSBTAG00000015457 | <i>FGFR1</i>     | 281768    | protein-coding | 0.55377773 | 4.45021557 | 22.4884119 | 3.74E-05 | 0.0021064  |

|                    |                     |           |                |            |            |            |          |            |
|--------------------|---------------------|-----------|----------------|------------|------------|------------|----------|------------|
| ENSBTAG00000047955 | <i>ZNF774</i>       | 100125278 | protein-coding | -1.1297788 | 3.04824857 | 22.4447535 | 3.79E-05 | 0.00212562 |
| ENSBTAG00000008862 | <i>GOLGB1</i>       | 532923    | protein-coding | -0.5520886 | 5.35232065 | 22.4338005 | 3.81E-05 | 0.00212562 |
| ENSBTAG00000016161 | <i>FLII</i>         | 514446    | protein-coding | -0.5294514 | 7.15744245 | 22.3250147 | 3.94E-05 | 0.00216145 |
| ENSBTAG00000004005 | <i>WDR7</i>         | 536469    | protein-coding | -0.6040378 | 4.15446097 | 22.3175219 | 3.95E-05 | 0.00216145 |
| ENSBTAG00000000981 | <i>KLHDC8B</i>      | 527321    | protein-coding | 0.74712054 | 2.41840362 | 22.2670555 | 4.01E-05 | 0.00218738 |
| ENSBTAG00000018382 | <i>SMS</i>          | 615950    | protein-coding | -0.5116069 | 5.30002678 | 22.2478589 | 4.03E-05 | 0.00219209 |
| ENSBTAG00000038124 | <i>FCGR2A</i>       | 782652    | protein-coding | 3.10483693 | -0.4697056 | 22.2103697 | 4.08E-05 | 0.00220949 |
| ENSBTAG00000006832 | <i>SLC5A6</i>       | 516021    | protein-coding | 0.83137883 | 3.37733    | 22.1308769 | 4.18E-05 | 0.0022469  |
| ENSBTAG00000011266 | <i>ZBTB16</i>       | 534401    | protein-coding | -1.1090452 | 5.77516961 | 22.1136772 | 4.21E-05 | 0.0022469  |
| ENSBTAG00000052420 | <i>MIR12060</i>     | 114482212 | ncRNA          | 1.22259848 | 0.64064534 | 22.103921  | 4.22E-05 | 0.0022469  |
| ENSBTAG00000014828 | <i>CACNA1A</i>      | 282648    | protein-coding | 0.81577955 | 2.0494841  | 22.0741068 | 4.26E-05 | 0.0022469  |
| ENSBTAG00000053162 |                     |           |                | -0.5075523 | 5.73037353 | 22.0723647 | 4.26E-05 | 0.0022469  |
| ENSBTAG00000001146 | <i>HIVEP2</i>       | 540396    | protein-coding | -0.7647712 | 7.0037666  | 22.0226858 | 4.33E-05 | 0.00226948 |
| ENSBTAG00000025931 | <i>NEU3</i>         | 281349    | protein-coding | -0.8489044 | 4.05783798 | 22.0122296 | 4.34E-05 | 0.00226948 |
| ENSBTAG00000040055 | <i>CAB39</i>        | 511451    | protein-coding | -0.5390979 | 7.1534487  | 22.0051122 | 4.35E-05 | 0.00226948 |
| ENSBTAG00000005617 | <i>SLC41A3</i>      | 524085    | protein-coding | 0.89102586 | 3.02221482 | 21.9719777 | 4.40E-05 | 0.00228484 |
| ENSBTAG00000021210 | <i>HES2</i>         | 516433    | protein-coding | 1.14788622 | 2.51203347 | 21.8182499 | 4.62E-05 | 0.00236778 |
| ENSBTAG00000051920 | <i>MIR29E</i>       | 100313099 | ncRNA          | 1.73418541 | 0.15571823 | 21.8126177 | 4.63E-05 | 0.00236778 |
| ENSBTAG00000045954 | <i>LRRC14B</i>      | 100301203 | protein-coding | 0.79757929 | 3.79543694 | 21.7287065 | 4.75E-05 | 0.0024107  |
| ENSBTAG00000008849 | <i>SORT1</i>        | 511591    | protein-coding | -0.8508383 | 4.95774758 | 21.7215765 | 4.76E-05 | 0.0024107  |
| ENSBTAG00000000815 | <i>EPHA2</i>        | 512798    | protein-coding | 0.69132823 | 3.37551024 | 21.6875897 | 4.81E-05 | 0.0024183  |
| ENSBTAG00000019347 | <i>PLXDC1</i>       | 536989    | protein-coding | 1.18754713 | 3.1863339  | 21.6824119 | 4.82E-05 | 0.0024183  |
| ENSBTAG00000003650 | <i>NR4A2</i>        | 540245    | protein-coding | 2.44285027 | 2.9237212  | 21.6777744 | 4.83E-05 | 0.0024183  |
| ENSBTAG00000011368 | <i>NOC3L</i>        | 510425    | protein-coding | -0.5238862 | 3.52751562 | 21.6364834 | 4.89E-05 | 0.00244149 |
| ENSBTAG00000004659 | <i>COQ10B</i>       | 514221    | protein-coding | 1.53005926 | 3.30852664 | 21.5809532 | 4.98E-05 | 0.00246058 |
| ENSBTAG00000012863 | <i>GDPD2</i>        | 514673    | protein-coding | 1.36573256 | 1.74049512 | 21.5786219 | 4.98E-05 | 0.00246058 |
| ENSBTAG00000048660 | <i>C19H17orf113</i> | 116601118 | protein-coding | -1.8675407 | -0.1607789 | 21.4257424 | 5.23E-05 | 0.00254026 |
| ENSBTAG00000053073 |                     |           |                | 1.60302116 | 1.3347069  | 21.4237893 | 5.23E-05 | 0.00254026 |
| ENSBTAG00000013392 | <i>PLD2</i>         | 522159    | protein-coding | 0.52082142 | 3.67239929 | 21.4007112 | 5.27E-05 | 0.00255022 |
| ENSBTAG00000046162 | <i>ZNF385C</i>      | 100298918 | protein-coding | -2.2617723 | 0.49763085 | 21.3780734 | 5.31E-05 | 0.0025599  |
| ENSBTAG00000020393 | <i>METTL21C</i>     | 519447    | protein-coding | 1.81713145 | 2.83448417 | 21.3180651 | 5.41E-05 | 0.00259164 |
| ENSBTAG00000011397 | <i>UNC13B</i>       | 530692    | protein-coding | 0.5327443  | 4.47733664 | 21.1559507 | 5.70E-05 | 0.00269803 |
| ENSBTAG00000002028 | <i>DIPK1A</i>       | 541171    | protein-coding | 0.65868012 | 3.71539476 | 21.1556097 | 5.70E-05 | 0.00269803 |
| ENSBTAG00000047420 | <i>BTNL9</i>        | 100125313 | protein-coding | -0.9959889 | 5.22809644 | 21.1500393 | 5.71E-05 | 0.00269803 |
| ENSBTAG00000001244 | <i>PLAT</i>         | 281407    | protein-coding | 0.72719207 | 4.58343806 | 21.0727121 | 5.86E-05 | 0.00274732 |
| ENSBTAG00000024509 | <i>TMEM52</i>       | 617403    | protein-coding | 1.0706995  | 2.18952828 | 20.9822458 | 6.03E-05 | 0.00278982 |
| ENSBTAG00000049058 | <i>INHBB</i>        | 530430    | protein-coding | 1.20184652 | 1.90727396 | 20.9811838 | 6.03E-05 | 0.00278982 |
| ENSBTAG00000012441 | <i>SMAD7</i>        | 535916    | protein-coding | 1.14994834 | 3.04231853 | 20.978893  | 6.03E-05 | 0.00278982 |
| ENSBTAG00000003985 | <i>CCDC15</i>       | 512305    | protein-coding | 0.70842998 | 3.7772687  | 20.9689715 | 6.05E-05 | 0.00278982 |
| ENSBTAG00000044022 | <i>KIAA1671</i>     | 533883    | protein-coding | -1.0405471 | 3.98969782 | 20.9632799 | 6.06E-05 | 0.00278982 |
| ENSBTAG00000046121 | <i>LOC100196897</i> | 100196897 | protein-coding | 1.47660668 | 2.59006198 | 20.8893066 | 6.21E-05 | 0.00283848 |
| ENSBTAG00000015384 | <i>PHF13</i>        | 540889    | protein-coding | 0.97394666 | 1.08716982 | 20.8785601 | 6.23E-05 | 0.0028391  |
| ENSBTAG00000021538 | <i>MYO1E</i>        | 523485    | protein-coding | 0.81579537 | 3.97209178 | 20.819657  | 6.35E-05 | 0.00287393 |

|                    |                |           |                |            |            |            |            |            |
|--------------------|----------------|-----------|----------------|------------|------------|------------|------------|------------|
| ENSBTAG00000016354 | <i>IER2</i>    | 525380    | protein-coding | 0.87930119 | 3.77668803 | 20.810768  | 6.37E-05   | 0.00287393 |
| ENSBTAG00000012194 | <i>DENND2C</i> | 522279    | protein-coding | 1.05039186 | 1.79085761 | 20.7442575 | 6.51E-05   | 0.00292691 |
| ENSBTAG00000010389 | <i>STBD1</i>   | 513376    | protein-coding | 1.14591448 | 6.7890088  | 20.7008731 | 6.60E-05   | 0.00295878 |
| ENSBTAG00000019090 | <i>PLEKHH3</i> | 541100    | protein-coding | 1.32422433 | 3.91335589 | 20.6739641 | 6.66E-05   | 0.00297516 |
| ENSBTAG00000050914 | <i>CYYR1</i>   | 768230    | protein-coding | -0.5163914 | 5.48795179 | 20.5816983 | 6.86E-05   | 0.00302694 |
| ENSBTAG00000031824 | <i>RBM19</i>   | 507065    | protein-coding | -0.5038114 | 3.15054617 | 20.5263803 | 6.98E-05   | 0.00307209 |
| ENSBTAG00000019843 | <i>HAUS6</i>   | 538833    | protein-coding | -0.604353  | 3.88758457 | 20.4960681 | 7.05E-05   | 0.0030928  |
| ENSBTAG00000013616 | <i>AP4E1</i>   | 536144    | protein-coding | -0.5001321 | 4.53852549 | 20.3826266 | 7.32E-05   | 0.00319367 |
| ENSBTAG00000015938 | <i>ARAP3</i>   | 112447442 | protein-coding | 0.50093656 | 5.44387469 | 20.35397   | 7.39E-05   | 0.00319507 |
| ENSBTAG00000009976 |                |           |                | -0.5332932 | 4.44082918 | 20.3509617 | 7.39E-05   | 0.00319507 |
| ENSBTAG00000001133 | <i>VWA8</i>    | 524159    | protein-coding | -0.6773705 | 4.56655003 | 20.348458  | 7.40E-05   | 0.00319507 |
| ENSBTAG00000010843 | <i>PGRMC2</i>  | 534021    | protein-coding | 0.5588735  | 6.16404876 | 20.3026392 | 7.51E-05   | 0.00321773 |
| ENSBTAG00000046814 | <i>ACOT2</i>   | 511033    | protein-coding | -1.1748048 | 2.129367   | 20.2990912 | 7.52E-05   | 0.00321773 |
| ENSBTAG00000008131 | <i>RNF115</i>  | 614061    | protein-coding | -0.7749904 | 4.78604328 | 20.2704755 | 7.59E-05   | 0.00323758 |
| ENSBTAG00000015060 | <i>GBP5</i>    | 516949    | protein-coding | 1.10946496 | 3.39888806 | 20.2448054 | 7.65E-05   | 0.00325494 |
| ENSBTAG00000016229 | <i>KLF9</i>    | 539139    | protein-coding | -0.8305906 | 5.81364668 | 20.2327844 | 7.68E-05   | 0.00325789 |
| ENSBTAG00000027696 | <i>TTC30B</i>  | 538713    | protein-coding | -1.390292  | 0.17444364 | 20.1660119 | 7.85E-05   | 0.00330386 |
| ENSBTAG00000001773 |                |           |                | -0.7204334 | 3.73216048 | 20.1623414 | 7.86E-05   | 0.00330386 |
| ENSBTAG00000030348 | <i>ZNF582</i>  | 790311    | protein-coding | -0.9053058 | 1.61410873 | 20.1165311 | 7.98E-05   | 0.00334375 |
| ENSBTAG00000015251 | <i>ALG13</i>   | 515282    | protein-coding | 0.87975108 | 2.92272785 | 20.0946448 | 8.04E-05   | 0.00335777 |
| ENSBTAG00000025337 | <i>MYH13</i>   | 511687    | protein-coding | -0.6751467 | 6.96722339 | 20.0856081 | 8.06E-05   | 0.00335777 |
| ENSBTAG00000014472 | <i>LCMT2</i>   | 538825    | protein-coding | -1.5178502 | 0.17022578 | 20.0545906 | 8.15E-05   | 0.00338204 |
| ENSBTAG00000039695 | <i>PPP1R18</i> | 539829    | protein-coding | 0.5536275  | 3.6156489  | 20.0190584 | 8.24E-05   | 0.00339325 |
| ENSBTAG00000011808 | <i>MSTN</i>    | 281187    | protein-coding | 1.97802362 | 3.39475405 | 20.017608  | 8.24E-05   | 0.00339325 |
| ENSBTAG00000018214 | <i>SHISA2</i>  | 617336    | protein-coding | 1.30660345 | 5.82186987 | 19.9252818 | 8.50E-05   | 0.0034672  |
| ENSBTAG00000017680 | <i>NOS3</i>    | 287024    | protein-coding | 0.99797829 | 4.76799538 | 19.8904814 | 8.60E-05   | 0.00349694 |
| ENSBTAG00000053238 | <i>KALRN</i>   | 540675    | protein-coding | -0.7494676 | 3.41858537 | 19.8260874 | 8.78E-05   | 0.00353496 |
| ENSBTAG00000015424 | <i>WDR12</i>   | 528209    | protein-coding | -0.5684612 | 3.15501018 | 19.8220616 | 8.79E-05   | 0.00353496 |
| ENSBTAG00000053836 | <i>CCDC71L</i> | 112446372 | protein-coding | -1.6638059 | 0.6758319  | 19.8011713 | 8.85E-05   | 0.00353496 |
| ENSBTAG00000021090 | <i>ABCC1</i>   | 281588    | protein-coding | -0.7153737 | 5.70063419 | 19.7950101 | 8.87E-05   | 0.00353496 |
| ENSBTAG00000004895 | <i>AFAP1L2</i> | 615436    | protein-coding | 0.56966185 | 3.69092831 | 19.7888022 | 8.89E-05   | 0.00353496 |
| ENSBTAG00000008832 | <i>CCL1</i>    | 786156    | protein-coding | 1.17496337 | 2.61890427 | 19.725373  | 9.08E-05   | 0.00358857 |
| ENSBTAG00000009210 | <i>ZBTB44</i>  | 540532    | protein-coding | -0.5445238 | 4.49970722 | 19.665361  | 9.26E-05   | 0.0036399  |
| ENSBTAG00000000332 | <i>ERF</i>     | 789798    | protein-coding | 0.83126874 | 3.31259869 | 19.6333515 | 9.36E-05   | 0.00366834 |
| ENSBTAG00000003822 | <i>CROCC</i>   | 530641    | protein-coding | 0.56897502 | 3.75775442 | 19.558494  | 9.59E-05   | 0.00374661 |
| ENSBTAG00000043567 |                |           |                | 0.7221252  | 9.69991559 | 19.5527148 | 9.61E-05   | 0.00374661 |
| ENSBTAG00000000423 | <i>RBM4B</i>   | 505756    | protein-coding | 0.50906667 | 3.31178632 | 19.4675249 | 9.88E-05   | 0.00384051 |
| ENSBTAG00000039283 |                |           |                | -2.2564853 | -0.1393763 | 19.3734385 | 0.00010197 | 0.00392241 |
| ENSBTAG00000008652 | <i>STYXL2</i>  | 100124500 | protein-coding | -0.5783386 | 7.8890971  | 19.3314996 | 0.0001034  | 0.0039552  |
| ENSBTAG00000019967 | <i>RASA3</i>   | 282532    | protein-coding | 0.57678541 | 4.48727442 | 19.301645  | 0.00010444 | 0.00397308 |
| ENSBTAG00000054250 |                |           |                | 0.78066346 | 2.68683351 | 19.2924413 | 0.00010476 | 0.00397452 |
| ENSBTAG00000000731 | <i>WFIKK2</i>  | 531979    | protein-coding | 0.73998573 | 4.30286228 | 19.2054013 | 0.00010784 | 0.00404779 |
| ENSBTAG00000009145 | <i>SLC7A4</i>  | 504923    | protein-coding | 1.03264304 | 2.5527491  | 19.1944987 | 0.00010823 | 0.00405173 |

|                    |                    |           |                |            |            |            |            |            |
|--------------------|--------------------|-----------|----------------|------------|------------|------------|------------|------------|
| ENSBTAG00000003165 | <i>ADAMTS9</i>     | 537051    | protein-coding | 0.81186334 | 4.86348459 | 19.1801723 | 0.00010875 | 0.00405802 |
| ENSBTAG00000011358 | <i>IER3</i>        | 505455    | protein-coding | 1.03215939 | 3.84879201 | 19.1409097 | 0.00011018 | 0.0040814  |
| ENSBTAG00000000507 | <i>NR4A1</i>       | 528390    | protein-coding | 1.35061788 | 7.39380534 | 19.1264086 | 0.00011072 | 0.00409045 |
| ENSBTAG00000017266 | <i>ITGA6</i>       | 535043    | protein-coding | 0.68531926 | 6.37037262 | 19.0815132 | 0.00011239 | 0.00410707 |
| ENSBTAG00000007732 | <i>ARPP21</i>      | 618648    | protein-coding | -0.6288124 | 5.59048772 | 19.0649471 | 0.00011301 | 0.00410707 |
| ENSBTAG00000003015 | <i>SESNI</i>       | 538226    | protein-coding | -0.9220632 | 5.9984065  | 19.0647143 | 0.00011302 | 0.00410707 |
| ENSBTAG00000019052 | <i>ANK3</i>        | 511203    | protein-coding | 0.68096708 | 7.03864575 | 19.0636911 | 0.00011306 | 0.00410707 |
| ENSBTAG00000027425 | <i>CCDC190</i>     | 617478    | protein-coding | 1.35827044 | 2.14871309 | 19.0546501 | 0.0001134  | 0.00410707 |
| ENSBTAG00000009451 | <i>JDP2</i>        | 531476    | protein-coding | 0.68181378 | 2.58513589 | 19.0444168 | 0.00011379 | 0.00410707 |
| ENSBTAG00000006542 | <i>RABEP2</i>      | 511736    | protein-coding | 1.32804322 | 4.55254435 | 18.9509131 | 0.00011741 | 0.00422686 |
| ENSBTAG00000031548 | <i>LOC514257</i>   | 514257    | protein-coding | -0.7651879 | 5.62425071 | 18.9260496 | 0.0001184  | 0.004239   |
| ENSBTAG00000030247 | <i>NSMF</i>        | 615854    | protein-coding | 0.67471267 | 3.7767503  | 18.9195624 | 0.00011865 | 0.004239   |
| ENSBTAG00000009788 | <i>ACOT2</i>       | 785383    | protein-coding | -1.3697119 | 0.22037739 | 18.9090174 | 0.00011907 | 0.00424325 |
| ENSBTAG00000015821 | <i>AMPD3</i>       | 519803    | protein-coding | -1.7633225 | 3.01225221 | 18.8296714 | 0.00012229 | 0.00433586 |
| ENSBTAG00000011969 | <i>HSPB1</i>       | 516099    | protein-coding | -0.918784  | 8.80952526 | 18.7211682 | 0.00012684 | 0.00446447 |
| ENSBTAG00000019409 | <i>GNPTAB</i>      | 509610    | protein-coding | -0.7588462 | 4.8256365  | 18.7169677 | 0.00012701 | 0.00446447 |
| ENSBTAG00000012674 | <i>CNKSR3</i>      | 506781    | protein-coding | 0.72438707 | 2.91396797 | 18.7129943 | 0.00012718 | 0.00446447 |
| ENSBTAG00000005470 | <i>BIN3</i>        | 507115    | protein-coding | -0.700386  | 2.20210316 | 18.6635615 | 0.00012932 | 0.00450577 |
| ENSBTAG00000001835 | <i>GJA1</i>        | 281193    | protein-coding | 0.74051967 | 2.72424799 | 18.5967302 | 0.00013227 | 0.0045491  |
| ENSBTAG00000053806 | <i>LOC618737</i>   | 618737    | protein-coding | 1.31849693 | 2.16392991 | 18.5943716 | 0.00013238 | 0.0045491  |
| ENSBTAG00000000671 | <i>PARP3</i>       | 507426    | protein-coding | 1.67813726 | 2.06730287 | 18.5867281 | 0.00013272 | 0.0045491  |
| ENSBTAG00000020073 | <i>NCEH1</i>       | 534212    | protein-coding | -0.8042928 | 3.06442967 | 18.56436   | 0.00013373 | 0.00455768 |
| ENSBTAG00000004585 |                    |           |                | 0.60778059 | 3.11434686 | 18.5411734 | 0.00013478 | 0.00457432 |
| ENSBTAG00000049022 | <i>MIR12048</i>    | 114483693 | ncRNA          | 2.7023475  | -0.7411765 | 18.5255696 | 0.00013549 | 0.00457432 |
| ENSBTAG00000017310 | <i>EVA1C</i>       | 516536    | protein-coding | 1.12016068 | 0.54801375 | 18.5217717 | 0.00013566 | 0.00457432 |
| ENSBTAG00000015988 | <i>MYH11</i>       | 530050    | protein-coding | -1.1076493 | 5.20740978 | 18.5195818 | 0.00013577 | 0.00457432 |
| ENSBTAG00000015751 | <i>MEOX1</i>       | 529059    | protein-coding | 0.97698143 | 2.30875201 | 18.5091314 | 0.00013625 | 0.00457432 |
| ENSBTAG00000047502 | <i>FKBP5</i>       | 535704    | protein-coding | -1.4513221 | 7.45698684 | 18.5081293 | 0.00013629 | 0.00457432 |
| ENSBTAG00000009199 | <i>GLIS2</i>       | 527935    | protein-coding | 0.8001422  | 3.14673212 | 18.5038815 | 0.00013649 | 0.00457432 |
| ENSBTAG00000007246 | <i>TMEM204</i>     | 615464    | protein-coding | 0.65241213 | 3.83722251 | 18.4936576 | 0.00013696 | 0.00457927 |
| ENSBTAG00000039861 | <i>OAS1Y</i>       | 654488    | protein-coding | 1.3876696  | 4.55054756 | 18.4563805 | 0.0001387  | 0.0046155  |
| ENSBTAG00000003808 | <i>HDAC9</i>       | 535415    | protein-coding | 1.23413752 | 3.02290874 | 18.422553  | 0.0001403  | 0.0046577  |
| ENSBTAG00000014818 | <i>MYLK3</i>       | 526379    | protein-coding | 1.42131795 | 3.59631271 | 18.3909832 | 0.00014181 | 0.00469675 |
| ENSBTAG00000047155 | <i>C28H10orf71</i> | 540418    | protein-coding | -0.6978139 | 7.8478661  | 18.3762081 | 0.00014252 | 0.00470927 |
| ENSBTAG00000006081 | <i>PPM1J</i>       | 100848925 | protein-coding | 0.66657818 | 4.93492318 | 18.2604425 | 0.00014824 | 0.00484134 |
| ENSBTAG00000020414 | <i>DHX37</i>       | 529207    | protein-coding | -0.5904195 | 3.29172193 | 18.241629  | 0.00014919 | 0.00486115 |
| ENSBTAG00000013869 | <i>SH3BP4</i>      | 520462    | protein-coding | -0.6453565 | 4.11701964 | 18.1946255 | 0.0001516  | 0.0049168  |
| ENSBTAG00000002878 | <i>CHRD</i>        | 509942    | protein-coding | 0.77538425 | 2.79173775 | 18.1250939 | 0.00015523 | 0.00499972 |
| ENSBTAG00000021661 | <i>APAF1</i>       | 537782    | protein-coding | -0.6668897 | 4.15350952 | 18.1238097 | 0.0001553  | 0.00499972 |
| ENSBTAG00000006253 | <i>FLNC</i>        | 528415    | protein-coding | -0.9981815 | 11.8151321 | 18.1186533 | 0.00015558 | 0.00499972 |
| ENSBTAG00000031715 | <i>PCMTD2</i>      | 505807    | protein-coding | -0.5626602 | 5.76961703 | 18.1039291 | 0.00015636 | 0.00501346 |
| ENSBTAG00000025424 | <i>NOTCH4</i>      | 536128    | protein-coding | 0.59974216 | 5.14049173 | 18.0372866 | 0.00015996 | 0.00510562 |
| ENSBTAG00000016746 | <i>UBE2C</i>       | 506962    | protein-coding | 0.98057339 | 1.552143   | 17.9694195 | 0.00016372 | 0.00520193 |

|                     |                     |           |                |            |            |            |            |            |
|---------------------|---------------------|-----------|----------------|------------|------------|------------|------------|------------|
| ENSBTAG00000047088  |                     |           |                | -0.7795371 | 2.30738847 | 17.9017049 | 0.00016756 | 0.00529057 |
| ENSBTAG00000016782  | <i>SLC39A10</i>     | 521004    | protein-coding | -0.5691491 | 4.59792792 | 17.9003942 | 0.00016763 | 0.00529057 |
| ENSBTAG00000001816  | <i>SLC25A42</i>     | 504608    | protein-coding | -0.6486059 | 2.99050858 | 17.838717  | 0.00017122 | 0.0053916  |
| ENSBTAG00000027766  | <i>CIQTNF5</i>      | 614671    | protein-coding | 0.96446415 | 2.24181727 | 17.8202709 | 0.0001723  | 0.00541375 |
| ENSBTAG00000007554  | <i>IFI6</i>         | 512913    | protein-coding | 1.67463523 | 3.80831786 | 17.8133507 | 0.00017271 | 0.00541454 |
| ENSBTAG00000020584  | <i>IFT81</i>        | 519602    | protein-coding | 0.7785144  | 2.31630783 | 17.8065645 | 0.00017312 | 0.00541512 |
| ENSBTAG00000006907  | <i>NEB</i>          | 407121    | protein-coding | -0.5884613 | 13.9571834 | 17.7850607 | 0.0001744  | 0.00543113 |
| ENSBTAG00000020407  | <i>MTSS1</i>        | 523498    | protein-coding | 0.50220347 | 5.35957701 | 17.6914879 | 0.00018011 | 0.00557183 |
| ENSBTAG00000015702  | <i>PITX3</i>        | 512000    | protein-coding | -1.3082987 | 2.90333734 | 17.6455075 | 0.00018298 | 0.00563603 |
| ENSBTAG00000008564  | <i>LOC511161</i>    | 511161    | protein-coding | -2.0110144 | 1.11506481 | 17.6048686 | 0.00018557 | 0.00569322 |
| ENSBTAG00000004112  | <i>GAMT</i>         | 515270    | protein-coding | 0.53313951 | 6.34658229 | 17.5928369 | 0.00018634 | 0.00569322 |
| ENSBTAG00000039601  | <i>SAP25</i>        | 100296776 | protein-coding | 0.89897865 | 1.65605658 | 17.5778092 | 0.00018731 | 0.00570676 |
| ENSBTAG00000008817  | <i>LAMA4</i>        | 529670    | protein-coding | 0.67267518 | 5.92244528 | 17.5613854 | 0.00018837 | 0.00572682 |
| ENSBTAG00000016033  | <i>HOXD9</i>        | 100295338 | protein-coding | -0.5494684 | 3.70957492 | 17.5276414 | 0.00019058 | 0.00578148 |
| ENSBTAG00000005946  | <i>USP13</i>        | 100141289 | protein-coding | -0.6819269 | 6.85134615 | 17.5035563 | 0.00019217 | 0.00581728 |
| ENSBTAG00000003219  |                     |           |                | 0.81646711 | 2.37788893 | 17.4882013 | 0.0001932  | 0.00582532 |
| ENSBTAG00000012896  | <i>METTL7B</i>      | 506952    | protein-coding | -1.1764746 | 1.17649973 | 17.4871531 | 0.00019327 | 0.00582532 |
| ENSBTAG00000030521  | <i>IER5L</i>        | 782019    | protein-coding | 0.9433945  | 1.4965729  | 17.4662125 | 0.00019467 | 0.00584266 |
| ENSBTAG00000009292  | <i>TMEM100</i>      | 613987    | protein-coding | 0.98868483 | 2.78727508 | 17.4333316 | 0.0001969  | 0.00587422 |
| ENSBTAG00000014707  | <i>ISG15</i>        | 281871    | protein-coding | 1.70166995 | 3.169749   | 17.4322358 | 0.00019698 | 0.00587422 |
| ENSBTAG00000020125  | <i>RBFOX2</i>       | 514951    | protein-coding | 0.55479457 | 6.10246605 | 17.4144015 | 0.0001982  | 0.00588988 |
| ENSBTAG00000000625  | <i>SMAD6</i>        | 511279    | protein-coding | 1.05440287 | 1.26366651 | 17.4123452 | 0.00019834 | 0.00588988 |
| ENSBTAG00000012987  | <i>ULK1</i>         | 526310    | protein-coding | -0.5840099 | 6.65278597 | 17.4007832 | 0.00019913 | 0.00589117 |
| ENSBTAG00000046307  | <i>CEBPD</i>        | 281678    | protein-coding | -1.6032642 | 5.19570904 | 17.3995594 | 0.00019922 | 0.00589117 |
| ENSBTAG00000014608  | <i>KDM1B</i>        | 513667    | protein-coding | -0.5891441 | 3.76452021 | 17.3846051 | 0.00020025 | 0.00590937 |
| ENSBTAG00000018520  | <i>SCN1A</i>        | 529590    | protein-coding | 2.27981187 | 1.78598967 | 17.3763756 | 0.00020083 | 0.00591065 |
| ENSBTAG00000000564  | <i>NSG2</i>         | 613901    | protein-coding | 1.15841783 | 1.95603382 | 17.3719153 | 0.00020114 | 0.00591065 |
| ENSBTAG00000016169  | <i>IDI1</i>         | 497011    | protein-coding | 0.97871565 | 4.80761423 | 17.3487762 | 0.00020276 | 0.00594587 |
| ENSBTAG00000020854  | <i>BCL6B</i>        | 100138731 | protein-coding | 0.79892599 | 3.91905603 | 17.3324376 | 0.00020391 | 0.00596725 |
| ENSBTAG00000009055  | <i>RNF144B</i>      | 524166    | protein-coding | -0.6696627 | 6.78982828 | 17.2662537 | 0.00020865 | 0.00608073 |
| ENSBTAG00000008096  | <i>EDN1</i>         | 281137    | protein-coding | -1.3631616 | 0.57120187 | 17.242844  | 0.00021036 | 0.00609204 |
| ENSBTAG00000010493  | <i>SERTAD1</i>      | 539321    | protein-coding | 0.80071501 | 3.56646969 | 17.2406638 | 0.00021052 | 0.00609204 |
| ENSBTAG00000013131  | <i>FAM110D</i>      | 787384    | protein-coding | 0.81380531 | 2.0586777  | 17.2369631 | 0.00021079 | 0.00609204 |
| ENSBTAG00000013078  | <i>LOC104968411</i> | 104968411 | protein-coding | -1.1354801 | 3.57477774 | 17.1790694 | 0.00021508 | 0.00613631 |
| ENSBTAG00000006291  | <i>CYLD</i>         | 536421    | protein-coding | -0.602527  | 5.15948779 | 17.1749481 | 0.00021539 | 0.00613631 |
| ENSBTAG00000005413  | <i>NLRC5</i>        | 782441    | protein-coding | 0.56600019 | 4.75533581 | 17.1717878 | 0.00021563 | 0.00613631 |
| ENSBTAG000000050406 |                     |           |                | 0.92848304 | 1.22196418 | 17.1694712 | 0.0002158  | 0.00613631 |
| ENSBTAG00000009302  | <i>RCAN2</i>        | 525636    | protein-coding | -0.9157088 | 2.52094954 | 17.1486892 | 0.00021737 | 0.00613631 |
| ENSBTAG00000033801  | <i>VRK2</i>         | 523902    | protein-coding | -0.6796309 | 3.17649207 | 17.1467949 | 0.00021751 | 0.00613631 |
| ENSBTAG00000021911  | <i>PTPRG</i>        | 540575    | protein-coding | -0.542184  | 4.31611581 | 17.1442866 | 0.0002177  | 0.00613631 |
| ENSBTAG00000005444  | <i>UGGT1</i>        | 516332    | protein-coding | -0.5250524 | 4.34224714 | 17.1423421 | 0.00021785 | 0.00613631 |
| ENSBTAG00000043570  |                     |           |                | 0.77451059 | 10.6998651 | 17.1350098 | 0.00021841 | 0.00613631 |
| ENSBTAG00000006563  | <i>KLHL40</i>       | 514526    | protein-coding | -1.1083403 | 7.52348913 | 17.1191841 | 0.00021961 | 0.00615797 |

|                     |                 |           |                |            |            |            |            |            |
|---------------------|-----------------|-----------|----------------|------------|------------|------------|------------|------------|
| ENSBTAG00000003359  | <i>ELOVL5</i>   | 617293    | protein-coding | 0.61469986 | 3.35199085 | 17.1057486 | 0.00022065 | 0.00617459 |
| ENSBTAG00000014605  | <i>ETV6</i>     | 504512    | protein-coding | 0.55027665 | 3.96599252 | 17.0802693 | 0.00022262 | 0.00621737 |
| ENSBTAG00000049378  |                 |           |                | 1.6281474  | 2.06573774 | 16.9645418 | 0.00023181 | 0.00642302 |
| ENSBTAG00000053812  |                 |           |                | 0.89375526 | 1.83515343 | 16.9203606 | 0.00023542 | 0.00649756 |
| ENSBTAG00000018062  | <i>KIAA1522</i> | 788353    | protein-coding | -1.3584573 | 3.169349   | 16.8628918 | 0.00024021 | 0.0066168  |
| ENSBTAG00000034147  | <i>OLFML2B</i>  | 513053    | protein-coding | 0.7747999  | 3.36032047 | 16.8441278 | 0.0002418  | 0.00664749 |
| ENSBTAG00000027064  | <i>BTBD11</i>   | 539986    | protein-coding | -1.5773872 | 1.96439829 | 16.8071048 | 0.00024496 | 0.00670613 |
| ENSBTAG00000016546  | <i>PARP12</i>   | 513185    | protein-coding | 0.7508712  | 3.88640411 | 16.7451499 | 0.00025035 | 0.00681612 |
| ENSBTAG00000000125  | <i>SPATA5</i>   | 100297992 | protein-coding | -0.6999298 | 2.50259028 | 16.7390628 | 0.00025089 | 0.00681754 |
| ENSBTAG00000008192  | <i>PLPPR2</i>   | 520247    | protein-coding | 0.80584207 | 4.57685553 | 16.7075377 | 0.00025369 | 0.0068611  |
| ENSBTAG00000020267  | <i>WNT9A</i>    | 511308    | protein-coding | 0.88477423 | 1.83999075 | 16.6791001 | 0.00025624 | 0.00689638 |
| ENSBTAG00000018398  | <i>GPR4</i>     | 512876    | protein-coding | 1.09261842 | 1.31887622 | 16.6629315 | 0.0002577  | 0.00691772 |
| ENSBTAG00000046544  | <i>SLC7A10</i>  | 100126273 | protein-coding | 2.10557384 | -0.613095  | 16.6512435 | 0.00025876 | 0.00692467 |
| ENSBTAG00000013227  | <i>SNAI2</i>    | 520631    | protein-coding | 0.64479246 | 2.76947924 | 16.6356035 | 0.0002602  | 0.00694974 |
| ENSBTAG00000025450  | <i>SYNE2</i>    | 540504    | protein-coding | 0.55380968 | 7.18544583 | 16.6166643 | 0.00026194 | 0.00696985 |
| ENSBTAG00000040590  |                 |           |                | 0.98722295 | 1.66161323 | 16.6076023 | 0.00026278 | 0.00697897 |
| ENSBTAG00000038141  | <i>ADGRG1</i>   | 509703    | protein-coding | 0.52074705 | 4.97816518 | 16.5879407 | 0.00026461 | 0.00701365 |
| ENSBTAG00000006954  | <i>ZNF432</i>   | 539365    | protein-coding | -0.6615482 | 2.05613979 | 16.5828823 | 0.00026508 | 0.00701365 |
| ENSBTAG00000016908  | <i>METTL1</i>   | 511197    | protein-coding | -0.745567  | 1.96895207 | 16.5698832 | 0.0002663  | 0.00703269 |
| ENSBTAG00000023551  | <i>MOB3C</i>    | 614275    | protein-coding | 0.67702218 | 2.538149   | 16.5181055 | 0.00027121 | 0.00713573 |
| ENSBTAG00000003152  | <i>IFI27</i>    | 507138    | protein-coding | 1.38470681 | 4.69779431 | 16.4936487 | 0.00027357 | 0.00718427 |
| ENSBTAG00000010682  | <i>DDR1</i>     | 534092    | protein-coding | 0.75273996 | 3.83069288 | 16.4817093 | 0.00027473 | 0.00718786 |
| ENSBTAG00000025400  | <i>PARP4</i>    | 615359    | protein-coding | -0.5329338 | 3.79952043 | 16.4729126 | 0.00027558 | 0.00719689 |
| ENSBTAG00000008079  | <i>NRBP2</i>    | 504664    | protein-coding | 0.55264746 | 3.11743051 | 16.4494472 | 0.00027788 | 0.00723008 |
| ENSBTAG00000010366  | <i>HCRT1</i>    | 282248    | protein-coding | -1.3486883 | 1.42769624 | 16.4377225 | 0.00027904 | 0.00723424 |
| ENSBTAG00000007114  | <i>POC5</i>     | 533555    | protein-coding | -0.6741021 | 1.96234747 | 16.4374008 | 0.00027907 | 0.00723424 |
| ENSBTAG00000037794  | <i>MYH4</i>     | 408020    | protein-coding | -0.6255469 | 11.4082534 | 16.4086338 | 0.00028193 | 0.0072949  |
| ENSBTAG00000010111  | <i>TCF7L1</i>   | 515303    | protein-coding | 0.54312611 | 3.27322643 | 16.3581827 | 0.00028702 | 0.00741294 |
| ENSBTAG00000013530  | <i>DDAH2</i>    | 540386    | protein-coding | 0.664069   | 3.46924992 | 16.3518556 | 0.00028766 | 0.00741599 |
| ENSBTAG00000004679  | <i>WARS1</i>    | 281576    | protein-coding | 0.60952214 | 6.92421122 | 16.3167529 | 0.00029127 | 0.00749286 |
| ENSBTAG00000032292  | <i>CCDC159</i>  | 785202    | protein-coding | 0.8152237  | 3.2834362  | 16.3112548 | 0.00029184 | 0.00749286 |
| ENSBTAG00000000510  | <i>ATG101</i>   | 513049    | protein-coding | 0.72420674 | 4.64676997 | 16.3073706 | 0.00029224 | 0.00749286 |
| ENSBTAG00000020698  | <i>MTHFR</i>    | 497032    | protein-coding | 0.53560979 | 5.25338353 | 16.2803612 | 0.00029506 | 0.00753765 |
| ENSBTAG00000020626  | <i>ERCC6L2</i>  | 508357    | protein-coding | -0.562201  | 3.28398104 | 16.2617419 | 0.00029702 | 0.00756221 |
| ENSBTAG00000011659  | <i>PIGZ</i>     | 104968672 | protein-coding | 0.88952819 | 3.13506158 | 16.2610141 | 0.00029709 | 0.00756221 |
| ENSBTAG00000014336  | <i>WBP1L</i>    | 782651    | protein-coding | -0.7566764 | 3.78474597 | 16.0241102 | 0.00032328 | 0.0081258  |
| ENSBTAG00000009637  | <i>SLC12A2</i>  | 286845    | protein-coding | 0.67452999 | 5.03905596 | 15.9647268 | 0.00033022 | 0.00821274 |
| ENSBTAG000000051794 |                 |           |                | 0.55204084 | 2.47074638 | 15.9486382 | 0.00033213 | 0.00821274 |
| ENSBTAG00000046218  | <i>KLF11</i>    | 616730    | protein-coding | -0.9490947 | 6.22676254 | 15.944898  | 0.00033257 | 0.00821274 |
| ENSBTAG00000018682  | <i>SETD4</i>    | 540440    | protein-coding | -0.5802064 | 2.7012355  | 15.930195  | 0.00033433 | 0.00824165 |
| ENSBTAG00000014649  | <i>CPT2</i>     | 504502    | protein-coding | -0.5593965 | 4.06524667 | 15.8866816 | 0.00033958 | 0.00832745 |
| ENSBTAG00000008013  | <i>LRRC2</i>    | 541113    | protein-coding | -0.6887736 | 6.46025742 | 15.8334092 | 0.00034614 | 0.00844313 |
| ENSBTAG00000021182  | <i>DOCK4</i>    | 534227    | protein-coding | 0.55216353 | 4.68749692 | 15.8288405 | 0.0003467  | 0.00844313 |

|                    |                     |           |                |            |            |            |            |            |
|--------------------|---------------------|-----------|----------------|------------|------------|------------|------------|------------|
| ENSBTAG00000008654 | <i>HOOK2</i>        | 526516    | protein-coding | 0.56344738 | 3.79960886 | 15.8240723 | 0.0003473  | 0.00844313 |
| ENSBTAG00000051298 | <i>PVR</i>          | 526865    | protein-coding | 0.72224667 | 5.46565481 | 15.8064386 | 0.00034951 | 0.00845298 |
| ENSBTAG00000016801 | <i>RXRG</i>         | 509500    | protein-coding | 0.73680784 | 3.78627101 | 15.7928703 | 0.00035121 | 0.00847581 |
| ENSBTAG00000012143 | <i>TECPR2</i>       | 530121    | protein-coding | -0.5249413 | 3.03223542 | 15.7818961 | 0.0003526  | 0.00847747 |
| ENSBTAG00000047680 | <i>IRF7</i>         | 100125591 | protein-coding | 1.24913559 | 2.14021719 | 15.7755574 | 0.00035341 | 0.00847747 |
| ENSBTAG00000046503 | <i>NCOA7</i>        | 541071    | protein-coding | -0.6246369 | 2.79107035 | 15.7217615 | 0.00036031 | 0.00862543 |
| ENSBTAG00000007666 | <i>IGF2BP2</i>      | 519028    | protein-coding | -0.741507  | 2.69332976 | 15.6881731 | 0.0003647  | 0.00869046 |
| ENSBTAG00000004248 | <i>MLYCD</i>        | 512341    | protein-coding | -0.7310091 | 5.24311698 | 15.6820821 | 0.0003655  | 0.00869046 |
| ENSBTAG00000003825 | <i>PTPN12</i>       | 531877    | protein-coding | 0.50100169 | 4.56690443 | 15.6704526 | 0.00036703 | 0.00871224 |
| ENSBTAG00000008953 | <i>TAP1</i>         | 524959    | protein-coding | 0.63472859 | 5.24287952 | 15.6569856 | 0.00036882 | 0.00873302 |
| ENSBTAG00000012216 | <i>MLKL</i>         | 790225    | protein-coding | 0.9926757  | 1.19225542 | 15.6498475 | 0.00036977 | 0.00873302 |
| ENSBTAG00000010416 | <i>RIN3</i>         | 539951    | protein-coding | 0.57465653 | 4.0379086  | 15.637008  | 0.00037149 | 0.00875886 |
| ENSBTAG00000050737 |                     |           |                | -1.9704357 | 0.36199981 | 15.5889157 | 0.00037799 | 0.00886362 |
| ENSBTAG00000018213 | <i>TBCEL</i>        | 540781    | protein-coding | -0.5611266 | 2.8972829  | 15.5829112 | 0.00037881 | 0.00886362 |
| ENSBTAG00000003049 | <i>MICALL2</i>      | 510644    | protein-coding | 0.56716062 | 3.48722919 | 15.5516475 | 0.00038311 | 0.00889885 |
| ENSBTAG00000051225 |                     |           |                | 1.0798032  | 1.11617226 | 15.5435843 | 0.00038423 | 0.00891012 |
| ENSBTAG00000006160 | <i>SUOX</i>         | 509837    | protein-coding | -0.627066  | 3.05671684 | 15.5292291 | 0.00038623 | 0.00894176 |
| ENSBTAG00000021808 | <i>CACNB3</i>       | 282160    | protein-coding | 0.51971158 | 3.79363895 | 15.51859   | 0.00038772 | 0.00894819 |
| ENSBTAG00000037072 | <i>LOC112441908</i> | 112441908 | snRNA          | 2.83321753 | -0.6322429 | 15.5110189 | 0.00038878 | 0.00894819 |
| ENSBTAG00000001510 | <i>CDK17</i>        | 539655    | protein-coding | 0.50095538 | 3.94293606 | 15.5092339 | 0.00038903 | 0.00894819 |
| ENSBTAG00000015479 | <i>ZFPL1</i>        | 613442    | protein-coding | -0.5136269 | 2.93655405 | 15.5091119 | 0.00038905 | 0.00894819 |
| ENSBTAG00000016112 | <i>CCDC197</i>      | 617443    | protein-coding | 1.27529589 | 2.06613673 | 15.4625049 | 0.00039567 | 0.00908558 |
| ENSBTAG00000011482 | <i>SLC43A2</i>      | 511955    | protein-coding | -1.600128  | 6.1487181  | 15.42987   | 0.00040038 | 0.00915482 |
| ENSBTAG00000014270 | <i>UNC5B</i>        | 524942    | protein-coding | 0.74385159 | 4.10529465 | 15.428591  | 0.00040056 | 0.00915482 |
| ENSBTAG00000004290 | <i>DDX28</i>        | 539411    | protein-coding | -0.5391337 | 2.57288303 | 15.4280756 | 0.00040064 | 0.00915482 |
| ENSBTAG00000020084 | <i>LONRF1</i>       | 504489    | protein-coding | 0.71439939 | 2.82533009 | 15.3870492 | 0.00040664 | 0.00923209 |
| ENSBTAG00000033315 | <i>DNAJC1</i>       | 781036    | protein-coding | -0.5308336 | 3.28778936 | 15.3642223 | 0.00041003 | 0.0092939  |
| ENSBTAG00000019552 | <i>PGRMC1</i>       | 317706    | protein-coding | 0.59150649 | 4.41651097 | 15.3424575 | 0.00041328 | 0.0093027  |
| ENSBTAG00000030499 | <i>DIAPH1</i>       | 786565    | protein-coding | -0.8288405 | 6.11678716 | 15.3412988 | 0.00041345 | 0.0093027  |
| ENSBTAG00000001567 | <i>LRRK1</i>        | 513994    | protein-coding | 0.73719036 | 3.32303653 | 15.3395319 | 0.00041372 | 0.0093027  |
| ENSBTAG00000008132 | <i>SOX13</i>        | 788459    | protein-coding | 0.63429011 | 3.32140482 | 15.3200393 | 0.00041666 | 0.00935387 |
| ENSBTAG00000010943 | <i>SLC22A23</i>     | 614701    | protein-coding | -0.6895848 | 1.88023617 | 15.305369  | 0.00041889 | 0.00935909 |
| ENSBTAG00000038048 | <i>MRC1</i>         | 787578    | protein-coding | 1.40892834 | 2.74002993 | 15.2895953 | 0.00042129 | 0.009398   |
| ENSBTAG00000046862 | <i>MARCKSL1</i>     | 539555    | protein-coding | 0.79328023 | 2.25932219 | 15.266486  | 0.00042485 | 0.00944103 |
| ENSBTAG00000021508 | <i>LMOD3</i>        | 509978    | protein-coding | 0.68802982 | 8.16729715 | 15.2640001 | 0.00042524 | 0.00944103 |
| ENSBTAG00000010760 | <i>REV3L</i>        | 517422    | protein-coding | -0.6863795 | 6.76598349 | 15.2565209 | 0.00042639 | 0.00945185 |
| ENSBTAG00000012262 | <i>FBXO10</i>       | 781854    | protein-coding | -0.9254864 | 1.76832675 | 15.2338125 | 0.00042993 | 0.0095062  |
| ENSBTAG00000007390 | <i>VAT1</i>         | 510698    | protein-coding | 0.53582117 | 4.38337851 | 15.2033605 | 0.00043473 | 0.00957628 |
| ENSBTAG00000027320 | <i>KCNB1</i>        | 539528    | protein-coding | -0.9325967 | 3.89286834 | 15.1895529 | 0.00043692 | 0.00959456 |
| ENSBTAG00000016377 | <i>IPP</i>          | 785293    | protein-coding | 0.59205623 | 4.12038361 | 15.0970578 | 0.00045192 | 0.00986238 |
| ENSBTAG00000020219 | <i>MSS51</i>        | 508577    | protein-coding | 0.96214157 | 7.80728409 | 15.0834637 | 0.00045417 | 0.00988085 |
| ENSBTAG00000006846 | <i>LGALS9</i>       | 510813    | protein-coding | 0.70319495 | 4.79185545 | 15.0733809 | 0.00045585 | 0.00989525 |
| ENSBTAG00000050535 | <i>ZNF385D</i>      | 789528    | protein-coding | -1.1351157 | 3.26500537 | 15.071034  | 0.00045624 | 0.00989525 |



|                    |                |           |                |            |            |            |            |            |
|--------------------|----------------|-----------|----------------|------------|------------|------------|------------|------------|
| ENSBTAG00000012106 | <i>ADCK1</i>   | 533372    | protein-coding | -0.6845966 | 1.53646317 | 15.0507355 | 0.00045964 | 0.00993833 |
| ENSBTAG00000045789 | <i>TNNT2</i>   | 286816    | protein-coding | 0.88542632 | 1.56139266 | 15.0276048 | 0.00046354 | 0.00998409 |
| ENSBTAG00000007415 | <i>SLC7A8</i>  | 536818    | protein-coding | -1.2340511 | 6.46668273 | 15.0256095 | 0.00046388 | 0.00998409 |
| ENSBTAG00000031476 | <i>DLL1</i>    | 788775    | protein-coding | 0.54257146 | 3.59346851 | 14.9667982 | 0.00047398 | 0.01013942 |
| ENSBTAG00000010652 | <i>PDE4C</i>   | 524624    | protein-coding | 0.70060817 | 5.66632179 | 14.9429432 | 0.00047814 | 0.01021294 |
| ENSBTAG00000009493 | <i>BCL3</i>    | 531942    | protein-coding | 0.61202396 | 2.84844112 | 14.9198304 | 0.00048221 | 0.01025532 |
| ENSBTAG00000053762 |                |           |                | 1.92656897 | -0.7390427 | 14.911643  | 0.00048366 | 0.01025576 |
| ENSBTAG00000003836 | <i>ADAM19</i>  | 510907    | protein-coding | -0.61901   | 4.24696451 | 14.8851735 | 0.00048838 | 0.01032208 |
| ENSBTAG00000027694 | <i>TTC30A</i>  | 510160    | protein-coding | -0.8409003 | 1.26288876 | 14.8446218 | 0.00049571 | 0.01046128 |
| ENSBTAG00000017514 | <i>CCND1</i>   | 524530    | protein-coding | 1.24805491 | 1.36815991 | 14.835155  | 0.00049744 | 0.01046684 |
| ENSBTAG00000031135 | <i>CTXN3</i>   | 100125915 | protein-coding | 1.20427388 | 3.61735092 | 14.8350292 | 0.00049746 | 0.01046684 |
| ENSBTAG00000013556 | <i>UNC13D</i>  | 506146    | protein-coding | 0.94885039 | 1.68277576 | 14.820275  | 0.00050017 | 0.01050806 |
| ENSBTAG00000002615 | <i>LONRF3</i>  | 508189    | protein-coding | 0.88367739 | 3.20913706 | 14.8108601 | 0.00050191 | 0.0105288  |
| ENSBTAG00000011257 | <i>ASAH1</i>   | 510620    | protein-coding | 0.50167209 | 3.67634782 | 14.8052404 | 0.00050294 | 0.01053488 |
| ENSBTAG00000001814 | <i>PLXND1</i>  | 781625    | protein-coding | 0.71103069 | 5.70506784 | 14.7909209 | 0.0005056  | 0.01057479 |
| ENSBTAG00000010348 | <i>GATD1</i>   | 513454    | protein-coding | 0.50206901 | 3.51564226 | 14.7779283 | 0.00050802 | 0.01060972 |
| ENSBTAG00000039740 | <i>LY6G5B</i>  | 539236    | protein-coding | 0.6157189  | 2.38949006 | 14.7223417 | 0.00051853 | 0.0107812  |
| ENSBTAG00000010361 | <i>DLL4</i>    | 518746    | protein-coding | 0.84027057 | 3.94863489 | 14.666396  | 0.00052934 | 0.01095742 |
| ENSBTAG00000020130 | <i>CLCN3</i>   | 522719    | protein-coding | -0.5431836 | 4.27540639 | 14.6421513 | 0.0005341  | 0.0110397  |
| ENSBTAG00000040361 | <i>LFNG</i>    | 516209    | protein-coding | 0.74792369 | 3.41263755 | 14.6193695 | 0.00053862 | 0.01108417 |
| ENSBTAG00000016496 | <i>ZNF641</i>  | 538714    | protein-coding | -0.785232  | 2.11264936 | 14.5791163 | 0.00054669 | 0.01123392 |
| ENSBTAG00000007334 | <i>NFKBID</i>  | 614198    | protein-coding | 0.53958696 | 2.40503132 | 14.5747075 | 0.00054758 | 0.01123555 |
| ENSBTAG00000032933 | <i>TTC23L</i>  | 783234    | protein-coding | 1.97481717 | -0.1440398 | 14.5682312 | 0.0005489  | 0.01123555 |
| ENSBTAG00000012636 | <i>IKZF4</i>   | 540671    | protein-coding | -0.9303004 | 1.41357308 | 14.5460601 | 0.00055342 | 0.01130614 |
| ENSBTAG00000010455 | <i>INTS5</i>   | 514150    | protein-coding | -0.5308665 | 3.11271223 | 14.5413536 | 0.00055438 | 0.01130944 |
| ENSBTAG00000037533 | <i>C4A</i>     | 280678    | protein-coding | 0.87323178 | 3.49603122 | 14.5224423 | 0.00055828 | 0.01136356 |
| ENSBTAG00000045593 | <i>EARS2</i>   | 100300732 | protein-coding | -0.8830649 | 0.69477218 | 14.5206461 | 0.00055865 | 0.01136356 |
| ENSBTAG00000008240 | <i>GALNT15</i> | 618078    | protein-coding | -1.270443  | 0.61817506 | 14.5045966 | 0.00056198 | 0.01139838 |
| ENSBTAG00000015115 | <i>ACP4</i>    | 788015    | protein-coding | 0.58365115 | 2.2920015  | 14.4948433 | 0.00056402 | 0.01140694 |
| ENSBTAG00000020713 | <i>BACH2</i>   | 538296    | protein-coding | -1.353692  | 0.92906432 | 14.4948051 | 0.00056403 | 0.01140694 |
| ENSBTAG00000007704 | <i>ELOVL7</i>  | 614096    | protein-coding | 0.91443482 | 1.72423526 | 14.4711589 | 0.00056899 | 0.01149086 |
| ENSBTAG00000001864 | <i>NR4A3</i>   | 528877    | protein-coding | 3.4457912  | 5.28162809 | 14.4466433 | 0.00057419 | 0.01157922 |
| ENSBTAG00000009407 | <i>MBTD1</i>   | 511415    | protein-coding | -0.5270185 | 3.35660529 | 14.4236336 | 0.00057911 | 0.01164516 |
| ENSBTAG00000013317 | <i>RNF168</i>  | 613812    | protein-coding | -0.6643922 | 4.07449386 | 14.4179141 | 0.00058035 | 0.01165327 |
| ENSBTAG00000012966 | <i>SCRN3</i>   | 511983    | protein-coding | -0.5727412 | 3.31120247 | 14.4040875 | 0.00058333 | 0.01167692 |
| ENSBTAG00000049641 | <i>ENOX2</i>   | 100848511 | protein-coding | 0.96876133 | 3.38608241 | 14.4009564 | 0.00058401 | 0.01167692 |
| ENSBTAG00000024826 | <i>TECRL</i>   | 616643    | protein-coding | 0.65119611 | 3.2244313  | 14.3637491 | 0.00059214 | 0.01178546 |
| ENSBTAG00000005604 | <i>POPDC2</i>  | 540535    | protein-coding | 0.60575133 | 3.58952985 | 14.3561008 | 0.00059383 | 0.01178546 |
| ENSBTAG00000014885 | <i>MYOM3</i>   | 532872    | protein-coding | -0.8134698 | 7.59871706 | 14.3556393 | 0.00059393 | 0.01178546 |
| ENSBTAG00000013391 | <i>ANKH</i>    | 511800    | protein-coding | 0.67871745 | 4.37102308 | 14.3485748 | 0.00059549 | 0.01178546 |
| ENSBTAG00000021791 | <i>PARP9</i>   | 510532    | protein-coding | 0.67622455 | 3.33799024 | 14.3456642 | 0.00059614 | 0.01178546 |
| ENSBTAG00000046724 | <i>CBX6</i>    | 513830    | protein-coding | -0.5995126 | 2.2403054  | 14.3403572 | 0.00059732 | 0.01179219 |
| ENSBTAG00000001938 | <i>CKS2</i>    | 767985    | protein-coding | -0.9471078 | 1.80683198 | 14.3358705 | 0.00059831 | 0.01179535 |

|                      |                     |           |                |            |            |            |            |            |
|----------------------|---------------------|-----------|----------------|------------|------------|------------|------------|------------|
| ENSBTAG00000020166   | <i>ZNFX1</i>        | 539807    | protein-coding | 0.79767922 | 5.54559903 | 14.3251018 | 0.00060072 | 0.01182614 |
| ENSBTAG00000050196   |                     |           |                | -2.7441997 | -0.3189963 | 14.3118213 | 0.00060369 | 0.01185159 |
| ENSBTAG00000022580   | <i>INKA2</i>        | 616754    | protein-coding | 0.77540014 | 2.10574074 | 14.2551661 | 0.00061657 | 0.01205395 |
| ENSBTAG00000001274   | <i>PPM1L</i>        | 541235    | protein-coding | -0.609583  | 4.9351489  | 14.2407473 | 0.00061989 | 0.01207588 |
| ENSBTAG000000015402  | <i>GREB1</i>        | 508204    | protein-coding | -1.36044   | 1.72010374 | 14.2391384 | 0.00062027 | 0.01207588 |
| ENSBTAG000000032092  | <i>CDH11</i>        | 785475    | protein-coding | 0.57692488 | 2.81054066 | 14.2230251 | 0.000624   | 0.01211516 |
| ENSBTAG00000002922   | <i>GAB2</i>         | 529346    | protein-coding | -0.5062326 | 4.88507347 | 14.2157778 | 0.00062569 | 0.01213123 |
| ENSBTAG000000021582  | <i>NCAPG</i>        | 531234    | protein-coding | 0.87240521 | 1.50348325 | 14.1863694 | 0.0006326  | 0.01224827 |
| ENSBTAG00000000080   | <i>GRWD1</i>        | 540739    | protein-coding | -0.520365  | 3.63268438 | 14.1694128 | 0.00063662 | 0.01230915 |
| ENSBTAG000000014358  | <i>EVA1B</i>        | 618094    | protein-coding | 0.69445852 | 2.30882917 | 14.1628208 | 0.00063819 | 0.01232257 |
| ENSBTAG000000021829  | <i>GM2A</i>         | 504524    | protein-coding | 1.20954242 | 1.20218432 | 14.1522237 | 0.00064072 | 0.01234821 |
| ENSBTAG000000032301  | <i>SLC26A7</i>      | 617196    | protein-coding | 0.90356524 | 1.66705973 | 14.1499268 | 0.00064127 | 0.01234821 |
| ENSBTAG000000015405  | <i>DCHS1</i>        | 515576    | protein-coding | 0.58437715 | 4.70760952 | 14.1422983 | 0.0006431  | 0.01236655 |
| ENSBTAG00000004995   | <i>C1GALT1</i>      | 539417    | protein-coding | -0.5098319 | 2.82431655 | 14.129891  | 0.00064609 | 0.0123902  |
| ENSBTAG000000024091  | <i>MALL</i>         | 512289    | protein-coding | 0.75615921 | 2.81468492 | 14.1218817 | 0.00064803 | 0.01239426 |
| ENSBTAG000000003366  | <i>DDX58</i>        | 504760    | protein-coding | 0.7840645  | 3.76685446 | 14.1069662 | 0.00065166 | 0.01244603 |
| ENSBTAG000000012035  | <i>EXOC3L1</i>      | 526306    | protein-coding | 1.27604102 | 1.47108358 | 14.0966016 | 0.00065419 | 0.01247746 |
| ENSBTAG000000030425  | <i>ID3</i>          | 538690    | protein-coding | 0.57671351 | 4.79100566 | 14.0407497 | 0.00066802 | 0.01264635 |
| ENSBTAG000000007890  | <i>SEC14L5</i>      | 790103    | protein-coding | 1.15192443 | 1.25480478 | 14.0390788 | 0.00066843 | 0.01264635 |
| ENSBTAG000000031998  | <i>CXCL16</i>       | 511671    | protein-coding | 0.64552941 | 2.84426125 | 14.0287557 | 0.00067103 | 0.01264906 |
| ENSBTAG000000002669  | <i>RASSF4</i>       | 510549    | protein-coding | 0.74797321 | 2.70492613 | 13.992266  | 0.00068027 | 0.01278061 |
| ENSBTAG000000004165  |                     |           |                | 0.5001196  | 4.00840941 | 13.9894961 | 0.00068098 | 0.01278061 |
| ENSBTAG000000015008  | <i>CPA3</i>         | 528454    | protein-coding | 1.86001415 | 0.02468314 | 13.9791377 | 0.00068363 | 0.01281294 |
| ENSBTAG000000046122  | <i>NRARP</i>        | 100299743 | protein-coding | 1.10991952 | 0.73020767 | 13.9645064 | 0.0006874  | 0.01282385 |
| ENSBTAG000000007374  | <i>LHFPL2</i>       | 616131    | protein-coding | 0.67771765 | 3.01676629 | 13.9522298 | 0.00069057 | 0.01284081 |
| ENSBTAG000000006732  | <i>NRCAM</i>        | 534500    | protein-coding | -2.2706336 | -0.8017306 | 13.9379168 | 0.00069429 | 0.01286666 |
| ENSBTAG000000002902  | <i>ANO6</i>         | 521784    | protein-coding | -0.5559193 | 5.70308477 | 13.8672011 | 0.000713   | 0.01310215 |
| ENSBTAG000000005622  | <i>LITAF</i>        | 520564    | protein-coding | 0.59076686 | 3.84343843 | 13.853152  | 0.00071679 | 0.01314788 |
| ENSBTAG000000014286  | <i>IFT88</i>        | 514177    | protein-coding | -0.6980049 | 2.23439684 | 13.8510197 | 0.00071736 | 0.01314788 |
| ENSBTAG000000011146  | <i>RAB8B</i>        | 614242    | protein-coding | 0.61059795 | 4.09006882 | 13.8184425 | 0.00072622 | 0.0132693  |
| ENSBTAG000000015290  | <i>BAIAP2L2</i>     | 617924    | protein-coding | 1.27477411 | -0.106606  | 13.8123553 | 0.00072788 | 0.0132693  |
| ENSBTAG000000015200  | <i>L2HGDH</i>       | 514230    | protein-coding | 0.52940346 | 4.30358056 | 13.8093893 | 0.0007287  | 0.0132693  |
| ENSBTAG000000050809  | <i>GIPC3</i>        | 618265    | protein-coding | 1.2175041  | -0.0205345 | 13.8043368 | 0.00073009 | 0.01327742 |
| ENSBTAG000000007881  | <i>LOC100139670</i> | 100139670 | protein-coding | 1.33568677 | 3.38914507 | 13.7919979 | 0.00073349 | 0.01332211 |
| ENSBTAG0000000030913 | <i>MX1</i>          | 280872    | protein-coding | 1.42163977 | 5.19128531 | 13.7718824 | 0.00073908 | 0.01340627 |
| ENSBTAG000000019412  |                     |           |                | -0.5473968 | 2.46129951 | 13.7638275 | 0.00074133 | 0.01341659 |
| ENSBTAG000000000434  | <i>CRYAB</i>        | 281719    | protein-coding | -0.8620074 | 9.86607098 | 13.7630201 | 0.00074155 | 0.01341659 |
| ENSBTAG000000000727  | <i>RNF169</i>       | 525756    | protein-coding | -0.5780223 | 2.46728535 | 13.7503386 | 0.00074511 | 0.0134321  |
| ENSBTAG000000003212  | <i>NNAT</i>         | 353114    | protein-coding | 0.87852759 | 2.79808946 | 13.7497822 | 0.00074527 | 0.0134321  |
| ENSBTAG000000018810  | <i>THBS2</i>        | 338092    | protein-coding | -0.8823973 | 2.78373409 | 13.7422753 | 0.00074738 | 0.01343242 |
| ENSBTAG000000011345  | <i>SFMBT1</i>       | 511984    | protein-coding | -0.7541656 | 3.0554576  | 13.7343148 | 0.00074963 | 0.01343242 |
| ENSBTAG000000005198  | <i>FGF1</i>         | 281160    | protein-coding | -1.2115504 | 3.92153075 | 13.7336591 | 0.00074982 | 0.01343242 |
| ENSBTAG000000016332  | <i>ING3</i>         | 513000    | protein-coding | -0.5061511 | 3.04611364 | 13.7020213 | 0.00075883 | 0.01356621 |

|                    |                |           |                |            |            |            |            |            |
|--------------------|----------------|-----------|----------------|------------|------------|------------|------------|------------|
| ENSBTAG00000017086 | <i>GRB10</i>   | 407210    | protein-coding | 0.69272228 | 6.31152936 | 13.6998313 | 0.00075946 | 0.01356621 |
| ENSBTAG00000019175 | <i>SOBP</i>    | 537433    | protein-coding | 0.59453001 | 2.82825597 | 13.6856829 | 0.00076353 | 0.01361675 |
| ENSBTAG00000044160 | <i>MCCC2</i>   | 783065    | protein-coding | -0.6354122 | 2.70300257 | 13.6738459 | 0.00076696 | 0.01363094 |
| ENSBTAG00000005034 | <i>CAPN5</i>   | 536988    | protein-coding | 0.64064282 | 3.76435378 | 13.6273984 | 0.00078056 | 0.01381808 |
| ENSBTAG00000008552 |                |           |                | 0.5750931  | 2.09737144 | 13.6244966 | 0.00078141 | 0.01381808 |
| ENSBTAG00000006784 | <i>PLA2G4B</i> | 505485    | protein-coding | 0.65208694 | 2.62231481 | 13.608483  | 0.00078617 | 0.0138673  |
| ENSBTAG00000049742 |                |           |                | 1.51871949 | -0.0148054 | 13.596985  | 0.0007896  | 0.01390166 |
| ENSBTAG00000051609 | <i>PLPPR3</i>  | 100337214 | protein-coding | 1.11151314 | 0.891031   | 13.5953429 | 0.00079009 | 0.01390166 |
| ENSBTAG00000002640 | <i>KALRN</i>   | 540675    | protein-coding | -0.905888  | 1.74350017 | 13.5816212 | 0.00079421 | 0.01395669 |
| ENSBTAG00000048459 | <i>CARHSP1</i> | 506760    | protein-coding | 0.697032   | 3.1222739  | 13.565928  | 0.00079895 | 0.01402247 |
| ENSBTAG00000021773 | <i>ERCC4</i>   | 516371    | protein-coding | -0.5017006 | 3.26041107 | 13.5609623 | 0.00080046 | 0.01403141 |
| ENSBTAG00000016752 | <i>ASB10</i>   | 616286    | protein-coding | 0.53154074 | 3.90349079 | 13.5467737 | 0.00080478 | 0.01408958 |
| ENSBTAG00000002755 | <i>ANKRD12</i> | 534739    | protein-coding | 0.50849404 | 6.58602628 | 13.5375507 | 0.0008076  | 0.01411369 |
| ENSBTAG00000012251 | <i>MTR</i>     | 280869    | protein-coding | -0.5230081 | 4.20727826 | 13.5357198 | 0.00080816 | 0.01411369 |
| ENSBTAG00000016533 | <i>FOXP1</i>   | 515903    | protein-coding | 0.66074906 | 4.34933802 | 13.4799394 | 0.00082546 | 0.01427057 |
| ENSBTAG00000046104 |                |           |                | 0.66646795 | 2.12060396 | 13.4728543 | 0.00082768 | 0.01427057 |
| ENSBTAG00000003946 | <i>NECAB3</i>  | 514695    | protein-coding | 0.93992171 | 1.96430622 | 13.4725093 | 0.00082779 | 0.01427057 |
| ENSBTAG00000019146 | <i>OSBP2</i>   | 510311    | protein-coding | -1.1571001 | 1.73808192 | 13.4687693 | 0.00082897 | 0.01427057 |
| ENSBTAG00000038755 |                |           |                | -1.0088906 | 0.16932544 | 13.4646311 | 0.00083028 | 0.01427057 |
| ENSBTAG00000015635 | <i>TNFRSF4</i> | 528782    | protein-coding | 0.79356641 | 1.01434578 | 13.4617805 | 0.00083118 | 0.01427057 |
| ENSBTAG00000020737 | <i>SOX8</i>    | 530317    | protein-coding | 0.79300392 | 2.07290476 | 13.4506516 | 0.0008347  | 0.01429349 |
| ENSBTAG00000051586 | <i>ECE2</i>    | 281134    | protein-coding | -0.7410282 | 1.48493962 | 13.4403217 | 0.00083799 | 0.01433232 |
| ENSBTAG00000047706 | <i>ING2</i>    | 404141    | protein-coding | 0.63958079 | 2.72132722 | 13.4341544 | 0.00083996 | 0.01434756 |
| ENSBTAG00000039335 | <i>ARRDC2</i>  | 523285    | protein-coding | -1.231785  | 6.12542447 | 13.431148  | 0.00084092 | 0.01434756 |
| ENSBTAG00000016559 | <i>NUDT22</i>  | 533578    | protein-coding | 0.50542552 | 2.96416583 | 13.4197811 | 0.00084456 | 0.01439231 |
| ENSBTAG00000003191 | <i>FSCN1</i>   | 507342    | protein-coding | 0.71366747 | 4.74108412 | 13.3663593 | 0.00086192 | 0.01460158 |
| ENSBTAG00000020923 | <i>GDF1</i>    | 104968455 | protein-coding | 0.66939129 | 2.19690066 | 13.3506765 | 0.00086709 | 0.01463445 |
| ENSBTAG00000016155 | <i>GDPD3</i>   | 767913    | protein-coding | 0.73771156 | 1.35367648 | 13.2909611 | 0.00088707 | 0.01484709 |
| ENSBTAG00000020359 | <i>PLEKHM1</i> | 523424    | protein-coding | -0.5288477 | 4.29670662 | 13.2647552 | 0.00089599 | 0.01493476 |
| ENSBTAG00000006743 | <i>RBBP8</i>   | 512977    | protein-coding | -0.5542996 | 3.3796788  | 13.263125  | 0.00089655 | 0.01493476 |
| ENSBTAG00000021899 | <i>PDE9A</i>   | 511665    | protein-coding | -0.5468443 | 2.12869839 | 13.2505129 | 0.00090088 | 0.01495382 |
| ENSBTAG00000017697 | <i>CTF1</i>    | 514803    | protein-coding | 0.57793369 | 3.21977452 | 13.2406205 | 0.0009043  | 0.0149928  |
| ENSBTAG00000006069 | <i>CAPS</i>    | 616482    | protein-coding | 0.6640603  | 1.10759411 | 13.1117883 | 0.00095003 | 0.01560398 |
| ENSBTAG00000021298 | <i>NTMT2</i>   | 521303    | protein-coding | 1.1134182  | 2.76284192 | 13.078374  | 0.00096229 | 0.01578041 |
| ENSBTAG00000020536 | <i>HERC6</i>   | 527520    | protein-coding | 1.00102353 | 4.14027269 | 13.0387636 | 0.00097704 | 0.01593608 |
| ENSBTAG00000005433 | <i>SSUH2</i>   | 787021    | protein-coding | -1.2735738 | 0.27401203 | 13.0322502 | 0.00097949 | 0.01595753 |
| ENSBTAG00000005299 | <i>EDNRB</i>   | 281750    | protein-coding | 0.68888933 | 3.43012656 | 12.9862765 | 0.00099696 | 0.01620466 |
| ENSBTAG00000009863 | <i>BHLHE40</i> | 506945    | protein-coding | 0.83623779 | 6.30054403 | 12.9698487 | 0.00100329 | 0.01628863 |
| ENSBTAG00000013569 | <i>CD38</i>    | 327677    | protein-coding | 0.93314151 | 1.6931239  | 12.9345649 | 0.00101701 | 0.01640464 |
| ENSBTAG00000022714 | <i>HSPB3</i>   | 616007    | protein-coding | 0.54544533 | 3.17538342 | 12.9335159 | 0.00101742 | 0.01640464 |
| ENSBTAG00000016656 | <i>PARP14</i>  | 540789    | protein-coding | 0.83123487 | 4.73850283 | 12.9196028 | 0.00102289 | 0.01645514 |
| ENSBTAG00000038735 | <i>LHB</i>     | 280839    | protein-coding | 0.84824326 | 1.76103061 | 12.8912607 | 0.00103413 | 0.01657912 |
| ENSBTAG00000054239 | <i>KIF1B</i>   | 100337161 | protein-coding | -0.5409145 | 7.70308633 | 12.8796625 | 0.00103877 | 0.016613   |

|                    |                  |           |                |            |            |            |            |            |
|--------------------|------------------|-----------|----------------|------------|------------|------------|------------|------------|
| ENSBTAG00000006941 | <i>ATAT1</i>     | 786491    | protein-coding | 0.60944598 | 1.81288724 | 12.8784291 | 0.00103927 | 0.016613   |
| ENSBTAG00000035995 | <i>TNFAIP2</i>   | 786672    | protein-coding | 0.85393308 | 2.58083245 | 12.8720781 | 0.00104182 | 0.016613   |
| ENSBTAG00000008471 | <i>MX2</i>       | 280873    | protein-coding | 1.66188378 | 2.38059015 | 12.8712523 | 0.00104215 | 0.016613   |
| ENSBTAG00000017661 | <i>RFX2</i>      | 534475    | protein-coding | -1.1877472 | 2.70338079 | 12.8647905 | 0.00104475 | 0.01661519 |
| ENSBTAG00000015304 | <i>ANXA9</i>     | 528055    | protein-coding | -1.234827  | 0.35021432 | 12.8488209 | 0.00105121 | 0.01668192 |
| ENSBTAG00000002688 | <i>ATP1B1</i>    | 519758    | protein-coding | -0.534137  | 7.00629004 | 12.8127478 | 0.00106597 | 0.01689699 |
| ENSBTAG00000014171 | <i>NAPEPLD</i>   | 541291    | protein-coding | -0.5215538 | 3.48044802 | 12.8059405 | 0.00106877 | 0.01692245 |
| ENSBTAG00000011343 | <i>XAF1</i>      | 509740    | protein-coding | 0.95143948 | 2.62223063 | 12.799861  | 0.00107129 | 0.01694322 |
| ENSBTAG00000030317 | <i>PPP1R26</i>   | 618652    | protein-coding | -0.5223876 | 2.4970219  | 12.7634809 | 0.00108647 | 0.01712562 |
| ENSBTAG00000017228 | <i>TP53I11</i>   | 515682    | protein-coding | 0.61863645 | 3.73684329 | 12.7301918 | 0.00110057 | 0.01730901 |
| ENSBTAG00000039722 | <i>LOC782061</i> | 782061    | protein-coding | 1.06824454 | 0.70774198 | 12.7050994 | 0.00111132 | 0.01743725 |
| ENSBTAG00000039015 | <i>TMEM145</i>   | 513015    | protein-coding | 0.54512173 | 2.86170607 | 12.6756626 | 0.00112408 | 0.01756104 |
| ENSBTAG00000021316 | <i>COL4A3</i>    | 317711    | protein-coding | 1.25140148 | 1.37878317 | 12.6657594 | 0.0011284  | 0.01757014 |
| ENSBTAG00000033685 | <i>CCNJ</i>      | 523293    | protein-coding | -0.6456353 | 1.72219492 | 12.659788  | 0.00113102 | 0.01758777 |
| ENSBTAG00000019138 | <i>KIF3C</i>     | 777770    | protein-coding | 0.59788535 | 2.71523774 | 12.6412548 | 0.00113919 | 0.0176599  |
| ENSBTAG00000010346 | <i>ENAM</i>      | 527075    | protein-coding | -2.2588078 | -0.6174627 | 12.6333275 | 0.0011427  | 0.01769485 |
| ENSBTAG00000021942 | <i>HPS6</i>      | 511792    | protein-coding | -0.861635  | 1.06542908 | 12.5928582 | 0.00116081 | 0.01789652 |
| ENSBTAG00000051933 |                  |           |                | -1.1636103 | 1.34720511 | 12.5583334 | 0.0011765  | 0.01805932 |
| ENSBTAG00000015140 | <i>RUNDC1</i>    | 539525    | protein-coding | -0.5673674 | 2.83741841 | 12.5519222 | 0.00117944 | 0.01808471 |
| ENSBTAG00000010736 | <i>BB55</i>      | 528191    | protein-coding | -0.9157735 | 1.49807359 | 12.5439286 | 0.00118311 | 0.01810162 |
| ENSBTAG00000050453 | <i>ZNF835</i>    | 101908474 | protein-coding | -0.6275995 | 2.3020589  | 12.5280685 | 0.00119044 | 0.0181836  |
| ENSBTAG00000049158 | <i>ZNF596</i>    | 511959    | protein-coding | -0.5644583 | 2.44314964 | 12.5253429 | 0.0011917  | 0.0181836  |
| ENSBTAG00000046256 | <i>TMEM132C</i>  | 512602    | protein-coding | 1.51735891 | -0.0043319 | 12.5239603 | 0.00119235 | 0.0181836  |
| ENSBTAG00000016236 | <i>SLC12A6</i>   | 521217    | protein-coding | -0.5457286 | 3.50687468 | 12.4539124 | 0.00122535 | 0.0186281  |
| ENSBTAG00000045010 | <i>MIR2350</i>   | 100313332 | ncRNA          | 0.78181105 | 1.33185144 | 12.4536778 | 0.00122546 | 0.0186281  |
| ENSBTAG00000018151 | <i>HELQ</i>      | 539372    | protein-coding | -0.6171382 | 2.23273733 | 12.4411067 | 0.00123149 | 0.01869951 |
| ENSBTAG00000018799 | <i>GPSM1</i>     | 100139799 | protein-coding | 0.76932219 | 1.57397564 | 12.4137559 | 0.00124471 | 0.01883929 |
| ENSBTAG00000008142 | <i>IFIH1</i>     | 535490    | protein-coding | 0.69780565 | 3.45337499 | 12.4022562 | 0.00125031 | 0.01884269 |
| ENSBTAG00000009336 | <i>LXN</i>       | 781644    | protein-coding | 1.11544793 | 1.70046122 | 12.3924372 | 0.00125512 | 0.01885493 |
| ENSBTAG00000003986 | <i>CXXC5</i>     | 538485    | protein-coding | 0.5944792  | 4.98874261 | 12.3736989 | 0.00126435 | 0.01893325 |
| ENSBTAG00000024633 | <i>PIK3C2B</i>   | 537396    | protein-coding | 0.50671072 | 4.66011476 | 12.3558979 | 0.00127318 | 0.0189844  |
| ENSBTAG00000008808 | <i>CCDC17</i>    | 515836    | protein-coding | 0.67663811 | 3.29774244 | 12.3333345 | 0.00128447 | 0.01909151 |
| ENSBTAG00000009476 | <i>VEGFD</i>     | 286799    | protein-coding | 1.09643839 | 0.23403135 | 12.2832496 | 0.00130991 | 0.01932825 |
| ENSBTAG00000045868 |                  |           |                | -0.7489509 | 1.09978183 | 12.2825895 | 0.00131025 | 0.01932825 |
| ENSBTAG00000019979 | <i>CMPK2</i>     | 784304    | protein-coding | 0.72434355 | 2.99097438 | 12.2813295 | 0.0013109  | 0.01932825 |
| ENSBTAG00000014218 | <i>DKK1</i>      | 504445    | protein-coding | 1.64171181 | 1.93860436 | 12.2804642 | 0.00131134 | 0.01932825 |
| ENSBTAG00000048982 |                  |           |                | 0.57280968 | 3.86743951 | 12.2745382 | 0.00131439 | 0.0193419  |
| ENSBTAG00000049218 |                  |           |                | 1.00190411 | 1.91725337 | 12.2525667 | 0.00132577 | 0.01941882 |
| ENSBTAG00000003806 | <i>ECM1</i>      | 524222    | protein-coding | 0.94973567 | 3.15322273 | 12.189613  | 0.00135894 | 0.01982219 |
| ENSBTAG00000031441 | <i>FXYS5</i>     | 505584    | protein-coding | 0.60754959 | 3.02110822 | 12.1799956 | 0.00136408 | 0.01984073 |
| ENSBTAG00000054218 | <i>IGFBP5</i>    | 404185    | protein-coding | 1.02505752 | 6.51071927 | 12.1767065 | 0.00136585 | 0.01984073 |
| ENSBTAG00000050495 | <i>GREM1</i>     | 539079    | protein-coding | 2.0697017  | -0.6246929 | 12.1684742 | 0.00137027 | 0.01985947 |
| ENSBTAG00000010587 | <i>SH3BGRL</i>   | 614007    | protein-coding | 0.55300553 | 3.15536933 | 12.1559472 | 0.00137704 | 0.01990063 |

|                      |                  |           |                |            |            |            |            |            |
|----------------------|------------------|-----------|----------------|------------|------------|------------|------------|------------|
| ENSBTAG00000001537   | <i>TSKU</i>      | 529661    | protein-coding | 0.64993552 | 3.23722666 | 12.1389762 | 0.00138626 | 0.01996837 |
| ENSBTAG000000015132  | <i>RXFP2</i>     | 507053    | protein-coding | 1.19992795 | 0.82097364 | 12.1370803 | 0.0013873  | 0.01996837 |
| ENSBTAG000000050620  |                  |           |                | 0.60654582 | 1.9464876  | 12.1342907 | 0.00138882 | 0.01996837 |
| ENSBTAG000000051560  |                  |           |                | 1.17131024 | -0.1691287 | 12.1292466 | 0.00139158 | 0.01998762 |
| ENSBTAG000000044172  | <i>LMLN</i>      | 100337404 | protein-coding | -0.962236  | 0.64786578 | 12.1209921 | 0.00139611 | 0.02001182 |
| ENSBTAG00000007186   | <i>ARHGAP39</i>  | 532363    | protein-coding | 0.61316294 | 1.80538751 | 12.1153084 | 0.00139923 | 0.02003624 |
| ENSBTAG00000000717   | <i>PLPP2</i>     | 504545    | protein-coding | 1.42590252 | 0.24681179 | 12.0958086 | 0.00141002 | 0.02009234 |
| ENSBTAG000000055286  | <i>MACIR</i>     | 538782    | protein-coding | 0.62839456 | 1.71283293 | 12.0884464 | 0.00141411 | 0.02010207 |
| ENSBTAG000000052957  | <i>MON1B</i>     | 510379    | protein-coding | -0.5591058 | 1.79505245 | 12.0321858 | 0.00144583 | 0.02043323 |
| ENSBTAG000000017856  | <i>TSTD1</i>     | 615465    | protein-coding | 0.56347811 | 1.46623598 | 12.0212846 | 0.00145206 | 0.02048018 |
| ENSBTAG000000005275  | <i>PKIG</i>      | 404169    | protein-coding | 0.571475   | 4.31198511 | 12.0012626 | 0.00146358 | 0.02060737 |
| ENSBTAG000000039356  | <i>LOC782061</i> | 782061    | protein-coding | 1.35943838 | -0.9051686 | 11.9953618 | 0.001467   | 0.02062884 |
| ENSBTAG000000014465  | <i>SERPINE1</i>  | 281375    | protein-coding | 1.39733322 | 2.86159554 | 11.9584317 | 0.00148856 | 0.02082802 |
| ENSBTAG000000012082  | <i>TNFRSF12A</i> | 617439    | protein-coding | -1.5009526 | 5.32991376 | 11.9443897 | 0.00149685 | 0.02086103 |
| ENSBTAG000000009933  | <i>DTX3L</i>     | 515051    | protein-coding | 0.6915114  | 3.6863916  | 11.9335891 | 0.00150326 | 0.02090893 |
| ENSBTAG000000008124  | <i>GK</i>        | 505987    | protein-coding | -0.7704687 | 2.44542433 | 11.9202984 | 0.00151118 | 0.0209795  |
| ENSBTAG000000006752  | <i>PFKFB4</i>    | 534928    | protein-coding | -0.6101769 | 7.78644331 | 11.884216  | 0.00153292 | 0.02119592 |
| ENSBTAG000000003919  | <i>KIAA0408</i>  | 100140348 | protein-coding | -0.8896531 | 4.35569949 | 11.8757861 | 0.00153805 | 0.02124595 |
| ENSBTAG000000030599  | <i>SMOC1</i>     | 508379    | protein-coding | 1.02136106 | 2.65901673 | 11.8642803 | 0.00154508 | 0.02129711 |
| ENSBTAG000000008216  | <i>RRM2</i>      | 508167    | protein-coding | 1.2349805  | 1.37976363 | 11.8622982 | 0.00154629 | 0.02129711 |
| ENSBTAG000000018773  | <i>RND1</i>      | 508869    | protein-coding | 0.79943596 | 1.97465556 | 11.8562485 | 0.00155001 | 0.02130654 |
| ENSBTAG000000021377  | <i>S100A14</i>   | 618250    | protein-coding | 0.56832307 | 5.01649121 | 11.848311  | 0.00155489 | 0.02134963 |
| ENSBTAG000000013674  | <i>EDNRA</i>     | 281749    | protein-coding | -0.5258812 | 2.7693045  | 11.827604  | 0.00156771 | 0.02144306 |
| ENSBTAG000000053050  | <i>SAMD9</i>     | 514205    | protein-coding | 0.77387317 | 4.30755611 | 11.8265111 | 0.00156839 | 0.02144306 |
| ENSBTAG000000053476  | <i>WDR36</i>     | 514267    | protein-coding | -0.7259049 | 1.0444628  | 11.8187909 | 0.0015732  | 0.02145893 |
| ENSBTAG000000014628  | <i>OAS2</i>      | 529660    | protein-coding | 1.73760475 | 0.84100795 | 11.8186563 | 0.00157329 | 0.02145893 |
| ENSBTAG000000040001  | <i>MARVELD2</i>  | 541110    | protein-coding | 0.79287997 | 1.98504984 | 11.7826955 | 0.00159591 | 0.02166252 |
| ENSBTAG0000000051975 |                  |           |                | 1.16714327 | -0.5446057 | 11.7587324 | 0.00161118 | 0.02184868 |
| ENSBTAG000000016676  | <i>PTER</i>      | 782020    | protein-coding | 0.61507592 | 3.81295909 | 11.724645  | 0.00163316 | 0.02204067 |
| ENSBTAG0000000051541 |                  |           |                | 1.63370968 | -0.1819366 | 11.7017903 | 0.00164808 | 0.02217563 |
| ENSBTAG0000000054727 |                  |           |                | 0.61676885 | 1.98811623 | 11.6943522 | 0.00165297 | 0.02220156 |
| ENSBTAG000000010082  | <i>COL15A1</i>   | 100139730 | protein-coding | 0.50972711 | 8.00886228 | 11.6841846 | 0.00165968 | 0.02227037 |
| ENSBTAG000000047836  | <i>LOC785629</i> | 785629    | pseudo         | 0.51711322 | 2.27718264 | 11.6612983 | 0.00167488 | 0.02239655 |
| ENSBTAG0000000050114 | <i>SOX11</i>     | 107132954 | protein-coding | 1.52026613 | -0.0734387 | 11.6580673 | 0.00167704 | 0.02239655 |
| ENSBTAG000000000917  | <i>BMP1</i>      | 510360    | protein-coding | 0.54025609 | 3.72075833 | 11.6280684 | 0.00169721 | 0.02258033 |
| ENSBTAG000000010180  | <i>URB2</i>      | 514623    | protein-coding | -0.5596394 | 2.73915595 | 11.6181681 | 0.00170393 | 0.02261648 |
| ENSBTAG000000029926  | <i>MIR1-2</i>    | 100312988 | ncRNA          | 0.78368109 | 3.96583347 | 11.6169607 | 0.00170475 | 0.02261648 |
| ENSBTAG000000019244  | <i>P2RX6</i>     | 618262    | protein-coding | 0.78353212 | 2.69734894 | 11.6034665 | 0.00171396 | 0.02271718 |
| ENSBTAG000000010091  | <i>ARL6</i>      | 519014    | protein-coding | -0.7370225 | 1.77461908 | 11.583349  | 0.00172778 | 0.02286565 |
| ENSBTAG000000002024  | <i>ASB18</i>     | 100141009 | protein-coding | 0.79085813 | 1.98804944 | 11.5777679 | 0.00173163 | 0.02288681 |
| ENSBTAG000000021202  | <i>ACOT7</i>     | 514788    | protein-coding | 0.56984392 | 2.82385266 | 11.545324  | 0.00175423 | 0.02314199 |
| ENSBTAG000000000655  | <i>MIPOL1</i>    | 528380    | protein-coding | 0.71912086 | 1.01746846 | 11.5156299 | 0.00177518 | 0.02328749 |
| ENSBTAG000000005787  | <i>IFT57</i>     | 531436    | protein-coding | -0.5419445 | 2.31708533 | 11.4941188 | 0.00179053 | 0.02343386 |

|                    |                |        |                |            |            |            |            |            |
|--------------------|----------------|--------|----------------|------------|------------|------------|------------|------------|
| ENSBTAG00000017566 | <i>TUFT1</i>   | 282104 | protein-coding | 0.96679095 | 1.18295181 | 11.4809102 | 0.00180002 | 0.02349561 |
| ENSBTAG00000013048 | <i>NIPAL3</i>  | 616724 | protein-coding | -0.5773465 | 1.76440455 | 11.4771574 | 0.00180273 | 0.02349561 |
| ENSBTAG00000008060 | <i>SNRNP35</i> | 512142 | protein-coding | -0.5836914 | 1.79743444 | 11.4588253 | 0.00181602 | 0.02362504 |
| ENSBTAG00000007778 |                |        |                | -1.3433148 | 0.23260287 | 11.4511001 | 0.00182165 | 0.02365198 |
| ENSBTAG00000048717 |                |        |                | -0.5517037 | 2.78903402 | 11.4259077 | 0.00184014 | 0.02374139 |
| ENSBTAG00000054179 |                |        |                | 1.51656874 | -0.8198561 | 11.4217786 | 0.00184319 | 0.02375896 |
| ENSBTAG00000052504 | <i>KLF2</i>    | 520939 | protein-coding | 0.80773149 | 5.03704227 | 11.4030246 | 0.00185711 | 0.02387282 |
| ENSBTAG00000013300 | <i>KCNMA1</i>  | 282573 | protein-coding | -0.5056703 | 4.21324849 | 11.3841774 | 0.00187122 | 0.02403217 |
| ENSBTAG00000009400 | <i>FASTKD3</i> | 513260 | protein-coding | -0.5817777 | 1.9958143  | 11.3500343 | 0.00189706 | 0.02425341 |
| ENSBTAG00000002524 | <i>MRII</i>    | 534734 | protein-coding | -0.6555107 | 1.68614517 | 11.3274672 | 0.00191435 | 0.02443008 |
| ENSBTAG00000006731 | <i>SLC7A5</i>  | 282369 | protein-coding | 1.11203098 | 0.91617045 | 11.3205171 | 0.00191971 | 0.02445412 |
| ENSBTAG00000006030 | <i>MYOG</i>    | 281343 | protein-coding | 0.57266181 | 5.1041901  | 11.2923816 | 0.00194156 | 0.02462114 |
| ENSBTAG00000001110 | <i>SLC16A5</i> | 531531 | protein-coding | -0.5632761 | 4.61218298 | 11.2841306 | 0.00194802 | 0.02466498 |
| ENSBTAG00000010987 | <i>NFKBIZ</i>  | 282713 | protein-coding | 0.53507814 | 3.07211145 | 11.2672186 | 0.00196134 | 0.02478258 |
| ENSBTAG00000011586 | <i>HABP4</i>   | 514807 | protein-coding | -0.6041582 | 3.99065356 | 11.2355605 | 0.00198652 | 0.02496631 |
| ENSBTAG00000048350 |                |        |                | -1.2540093 | 3.26038179 | 11.2039092 | 0.00201204 | 0.02519381 |
| ENSBTAG00000045547 |                |        |                | 0.52753829 | 2.44897494 | 11.2020292 | 0.00201357 | 0.02519381 |
| ENSBTAG00000002880 | <i>SORBS1</i>  | 504625 | protein-coding | -0.6829286 | 7.13026993 | 11.1911199 | 0.00202246 | 0.0252204  |
| ENSBTAG00000016103 | <i>CBFB</i>    | 614678 | protein-coding | -0.5631078 | 3.36363591 | 11.1906217 | 0.00202286 | 0.0252204  |
| ENSBTAG00000030333 | <i>AOC3</i>    | 281002 | protein-coding | 0.5497111  | 6.20685887 | 11.1715812 | 0.00203848 | 0.0253477  |
| ENSBTAG00000040151 | <i>GCH1</i>    | 286815 | protein-coding | 0.74497466 | 1.89417175 | 11.1529914 | 0.00205384 | 0.02547128 |
| ENSBTAG00000039951 | <i>PRMT6</i>   | 540228 | protein-coding | -0.563399  | 1.62972065 | 11.1171601 | 0.00208381 | 0.02572017 |
| ENSBTAG00000020050 | <i>MLEC</i>    | 515309 | protein-coding | -0.5420791 | 3.68438585 | 11.1151235 | 0.00208553 | 0.02572017 |
| ENSBTAG00000003889 | <i>PER1</i>    | 516318 | protein-coding | 0.73698446 | 7.31822563 | 11.1137337 | 0.0020867  | 0.02572017 |
| ENSBTAG00000020469 | <i>TMED8</i>   | 614106 | protein-coding | -1.2916208 | -0.1350338 | 11.0862923 | 0.00211001 | 0.02591662 |
| ENSBTAG00000002647 | <i>RGS10</i>   | 614550 | protein-coding | 1.34898706 | 0.05248999 | 11.0812341 | 0.00211433 | 0.02594711 |
| ENSBTAG00000011662 | <i>SOX18</i>   | 519439 | protein-coding | 0.79195259 | 3.51656241 | 11.0760104 | 0.00211881 | 0.02597941 |
| ENSBTAG00000011554 | <i>SURF6</i>   | 511610 | protein-coding | -0.6131838 | 2.23811684 | 11.0493355 | 0.00214183 | 0.02623882 |
| ENSBTAG00000021329 | <i>ZBTB3</i>   | 508118 | protein-coding | -0.8772161 | 0.18199232 | 11.0419557 | 0.00214825 | 0.02629454 |
| ENSBTAG00000009685 | <i>ERII</i>    | 540728 | protein-coding | -0.5367198 | 1.82537591 | 11.0297482 | 0.00215891 | 0.02640204 |
| ENSBTAG00000000095 | <i>CD274</i>   | 533834 | protein-coding | 1.36120539 | 0.5729203  | 11.0139464 | 0.00217279 | 0.02651142 |
| ENSBTAG00000000928 | <i>SPECCI</i>  | 506538 | protein-coding | -0.669385  | 3.52573504 | 11.0072318 | 0.00217871 | 0.02652903 |
| ENSBTAG00000001748 | <i>TRIM45</i>  | 539091 | protein-coding | 0.50208041 | 4.23992508 | 10.9962821 | 0.00218842 | 0.02660116 |
| ENSBTAG00000011316 | <i>ZC3H12A</i> | 535344 | protein-coding | 0.52496748 | 2.18024656 | 10.9703633 | 0.00221157 | 0.02679003 |
| ENSBTAG00000003312 | <i>CHST15</i>  | 534506 | protein-coding | 0.75078556 | 2.99107974 | 10.953749  | 0.00222655 | 0.02686321 |
| ENSBTAG00000007156 | <i>AGAP2</i>   | 504833 | protein-coding | -0.5325991 | 2.32408207 | 10.9493071 | 0.00223057 | 0.0268814  |
| ENSBTAG00000051604 |                |        |                | 1.59103296 | 1.2380366  | 10.9443628 | 0.00223506 | 0.02691243 |
| ENSBTAG00000008583 | <i>PALD1</i>   | 524694 | protein-coding | 0.99605106 | 2.71604666 | 10.940112  | 0.00223892 | 0.02693594 |
| ENSBTAG00000052721 |                |        |                | -0.9459571 | 0.98911927 | 10.9091896 | 0.00226725 | 0.02716075 |
| ENSBTAG00000002127 | <i>TCP11L2</i> | 541012 | protein-coding | -0.5424717 | 4.44354686 | 10.9004495 | 0.00227533 | 0.0272112  |
| ENSBTAG00000011680 | <i>PAPLN</i>   | 614084 | protein-coding | 0.98655449 | 0.52419699 | 10.8581665 | 0.00231485 | 0.02750309 |
| ENSBTAG00000046153 |                |        |                | -0.7990038 | 3.7611653  | 10.8463917 | 0.00232598 | 0.0275826  |
| ENSBTAG00000021035 | <i>CTSK</i>    | 513038 | protein-coding | 0.51991707 | 4.68509393 | 10.8238737 | 0.00234744 | 0.027697   |

|                    |                     |           |                |            |            |            |            |            |
|--------------------|---------------------|-----------|----------------|------------|------------|------------|------------|------------|
| ENSBTAG00000012991 |                     |           |                | -1.1313131 | 3.15965656 | 10.8018828 | 0.00236859 | 0.02789984 |
| ENSBTAG00000019900 | <i>LNPEP</i>        | 521633    | protein-coding | -0.6178799 | 5.23950175 | 10.7682588 | 0.00240133 | 0.02821467 |
| ENSBTAG00000012180 | <i>BMF</i>          | 541141    | protein-coding | -0.6043167 | 2.18783614 | 10.7550539 | 0.00241432 | 0.02825216 |
| ENSBTAG00000019949 | <i>DBR1</i>         | 530188    | protein-coding | -0.5442603 | 2.5885408  | 10.7468382 | 0.00242244 | 0.02827346 |
| ENSBTAG00000018020 | <i>GNAT1</i>        | 281794    | protein-coding | 1.61191536 | 0.02143067 | 10.7419053 | 0.00242733 | 0.02828407 |
| ENSBTAG00000014058 | <i>LDB2</i>         | 617976    | protein-coding | 0.79496301 | 2.04181433 | 10.7278286 | 0.00244135 | 0.0283653  |
| ENSBTAG00000031777 | <i>GDPD5</i>        | 532719    | protein-coding | 0.61832854 | 1.88682201 | 10.7268075 | 0.00244237 | 0.0283653  |
| ENSBTAG00000016185 | <i>ENAH</i>         | 513095    | protein-coding | -0.5767998 | 4.64171817 | 10.7208103 | 0.00244836 | 0.02841152 |
| ENSBTAG00000045625 | <i>NTN3</i>         | 787961    | protein-coding | -1.858443  | -0.9914379 | 10.7074464 | 0.00246179 | 0.02854375 |
| ENSBTAG00000013152 | <i>NIPSNAP1</i>     | 614972    | protein-coding | 0.64174916 | 3.29634852 | 10.6873188 | 0.00248215 | 0.0287562  |
| ENSBTAG00000015779 | <i>PML</i>          | 100138545 | protein-coding | 0.62900358 | 3.56667643 | 10.6787084 | 0.00249092 | 0.02876357 |
| ENSBTAG00000009037 | <i>GALNT12</i>      | 508488    | protein-coding | 0.66128765 | 2.01990125 | 10.6732692 | 0.00249647 | 0.02878    |
| ENSBTAG00000008611 | <i>IGFBP4</i>       | 282262    | protein-coding | 0.65263223 | 4.50166041 | 10.6711887 | 0.0024986  | 0.02878096 |
| ENSBTAG00000038938 | <i>LOC781710</i>    | 781710    | protein-coding | 1.4816329  | 1.66740092 | 10.6622139 | 0.00250781 | 0.02886336 |
| ENSBTAG00000051176 |                     |           |                | 1.30043748 | 1.04324025 | 10.6376928 | 0.00253314 | 0.02905987 |
| ENSBTAG00000020835 | <i>KIAA0513</i>     | 507534    | protein-coding | -0.5033395 | 3.83507669 | 10.6154946 | 0.00255631 | 0.02919804 |
| ENSBTAG00000001879 | <i>PER2</i>         | 512237    | protein-coding | 0.62130995 | 4.19762175 | 10.600619  | 0.00257196 | 0.02928286 |
| ENSBTAG00000054241 | <i>LOC100300896</i> | 100300896 | protein-coding | -1.0322212 | 3.18806079 | 10.597305  | 0.00257546 | 0.02928286 |
| ENSBTAG00000030979 | <i>TUBA3E</i>       | 534900    | protein-coding | -1.1130934 | -0.3575374 | 10.5722809 | 0.00260206 | 0.0295138  |
| ENSBTAG00000003763 | <i>MYO5C</i>        | 532574    | protein-coding | 1.43961396 | 1.40242847 | 10.5610438 | 0.0026141  | 0.02960267 |
| ENSBTAG00000016486 | <i>SORBS2</i>       | 614391    | protein-coding | -0.8496461 | 2.87615934 | 10.535099  | 0.00264213 | 0.02984576 |
| ENSBTAG00000008165 | <i>ITGA2B</i>       | 515011    | protein-coding | 0.50723206 | 2.55352218 | 10.524254  | 0.00265394 | 0.02990215 |
| ENSBTAG00000012681 | <i>CORO2B</i>       | 615274    | protein-coding | 0.53376769 | 3.51890604 | 10.4994216 | 0.0026812  | 0.03014596 |
| ENSBTAG00000008545 | <i>ATF3</i>         | 515266    | protein-coding | 2.43618874 | 6.55148002 | 10.4791561 | 0.00270367 | 0.03032418 |
| ENSBTAG00000014529 | <i>GBP4</i>         | 613313    | protein-coding | 1.23844536 | 1.93163188 | 10.4756697 | 0.00270755 | 0.03034358 |
| ENSBTAG00000001029 | <i>RASGRP2</i>      | 512056    | protein-coding | 0.743557   | 3.30023401 | 10.4720821 | 0.00271156 | 0.03036428 |
| ENSBTAG00000008250 | <i>SPRY4</i>        | 504593    | protein-coding | 0.99419283 | 3.34599571 | 10.4661456 | 0.0027182  | 0.03036617 |
| ENSBTAG00000008625 | <i>PLEKHF1</i>      | 782309    | protein-coding | 0.5550919  | 2.55304353 | 10.4567935 | 0.0027287  | 0.03041102 |
| ENSBTAG00000019015 | <i>IFITM3</i>       | 282255    | protein-coding | 0.83267929 | 2.63132864 | 10.4231023 | 0.00276687 | 0.03069066 |
| ENSBTAG00000000256 |                     |           |                | 0.5228658  | 4.31768973 | 10.4128756 | 0.00277857 | 0.03077194 |
| ENSBTAG00000013405 | <i>CIBAR1</i>       | 614070    | protein-coding | -0.510162  | 2.27673391 | 10.3738767 | 0.00282367 | 0.0311478  |
| ENSBTAG00000005416 | <i>PPIL3</i>        | 615703    | protein-coding | -0.5876903 | 1.99273363 | 10.3525917 | 0.00284862 | 0.03127707 |
| ENSBTAG00000018227 | <i>SLC4A7</i>       | 510209    | protein-coding | -0.5456991 | 5.09823308 | 10.3100156 | 0.00289924 | 0.03170912 |
| ENSBTAG00000006035 | <i>PPP1R1B</i>      | 282459    | protein-coding | 0.84106886 | 1.5244466  | 10.3040501 | 0.0029064  | 0.03176284 |
| ENSBTAG00000006155 | <i>CCRL2</i>        | 515976    | protein-coding | -0.7236449 | 3.00190403 | 10.2918492 | 0.00292112 | 0.03188525 |
| ENSBTAG00000009101 | <i>SH2B3</i>        | 614726    | protein-coding | 0.54471925 | 2.95389118 | 10.2910136 | 0.00292213 | 0.03188525 |
| ENSBTAG00000015086 | <i>HSD11B1</i>      | 282589    | protein-coding | 0.89726959 | 0.52241061 | 10.2558422 | 0.00296503 | 0.03215613 |
| ENSBTAG00000011446 | <i>SEMA7A</i>       | 614707    | protein-coding | 0.61578462 | 4.15133137 | 10.2534039 | 0.00296803 | 0.03215613 |
| ENSBTAG00000029828 | <i>MIR421</i>       | 100313263 | ncRNA          | 0.62686278 | 1.83739103 | 10.212532  | 0.00301878 | 0.03250397 |
| ENSBTAG00000026408 |                     |           |                | 0.72610049 | 1.0133231  | 10.2121558 | 0.00301925 | 0.03250397 |
| ENSBTAG00000037938 | <i>LOC613444</i>    | 613444    | protein-coding | -0.5005055 | 2.26518349 | 10.1959931 | 0.00303958 | 0.03258582 |
| ENSBTAG00000002037 | <i>ATXN7L1</i>      | 534448    | protein-coding | -0.7456549 | 2.2856034  | 10.1770305 | 0.00306362 | 0.03279356 |
| ENSBTAG00000009080 | <i>ITGB6</i>        | 282644    | protein-coding | 0.63865763 | 5.03286262 | 10.1674066 | 0.0030759  | 0.03289805 |

|                     |                     |           |                |            |            |            |            |            |
|---------------------|---------------------|-----------|----------------|------------|------------|------------|------------|------------|
| ENSBTAG00000052037  | <i>LOC104973830</i> | 104973830 | ncRNA          | 0.82458899 | 1.86590821 | 10.1524811 | 0.00309504 | 0.03295803 |
| ENSBTAG00000010146  | <i>PLXNB3</i>       | 504294    | protein-coding | 1.05767487 | 0.42451239 | 10.1522232 | 0.00309538 | 0.03295803 |
| ENSBTAG00000004908  | <i>CHRNA</i>        | 281688    | protein-coding | 0.59152354 | 5.15487875 | 10.0587347 | 0.00321825 | 0.03385155 |
| ENSBTAG000000046101 | <i>ZNF470</i>       | 444866    | protein-coding | 0.73472146 | 1.5690481  | 10.0486059 | 0.00323187 | 0.03392381 |
| ENSBTAG00000010419  | <i>CYP2R1</i>       | 541302    | protein-coding | -0.7351356 | 2.33097806 | 10.0310414 | 0.00325564 | 0.03412242 |
| ENSBTAG000000045943 | <i>CHRNA</i>        | 281689    | protein-coding | 1.0061452  | 2.11684608 | 10.008045  | 0.00328705 | 0.03440034 |
| ENSBTAG00000007689  | <i>LPIN1</i>        | 537224    | protein-coding | -0.9953517 | 6.73340231 | 9.98896154 | 0.00331335 | 0.03457283 |
| ENSBTAG000000027081 | <i>ATP10A</i>       | 510723    | protein-coding | 0.79562042 | 1.30310245 | 9.98105688 | 0.00332432 | 0.03461025 |
| ENSBTAG000000032051 | <i>SULT1C4</i>      | 783020    | protein-coding | -0.9358036 | 1.110502   | 9.9751244  | 0.00333257 | 0.03464493 |
| ENSBTAG00000007780  | <i>CAMK1</i>        | 520498    | protein-coding | 0.71139829 | 1.3710448  | 9.92075047 | 0.00340924 | 0.03525973 |
| ENSBTAG00000000199  | <i>PDP1</i>         | 280891    | protein-coding | 0.52055167 | 6.00687632 | 9.90951792 | 0.00342532 | 0.03539995 |
| ENSBTAG000000017371 | <i>RELL2</i>        | 529327    | protein-coding | 0.74982337 | 0.90182582 | 9.90187596 | 0.0034363  | 0.03543174 |
| ENSBTAG000000016424 | <i>MMP25</i>        | 531092    | protein-coding | 1.311437   | 0.25569705 | 9.9017314  | 0.00343651 | 0.03543174 |
| ENSBTAG000000009854 | <i>MPHOSPH10</i>    | 531149    | protein-coding | -0.5475049 | 3.28262742 | 9.90037399 | 0.00343846 | 0.03543174 |
| ENSBTAG000000004085 | <i>ASF1B</i>        | 510538    | protein-coding | 0.89874611 | 0.79312629 | 9.89741363 | 0.00344273 | 0.0354438  |
| ENSBTAG000000010030 |                     |           |                | -0.8896121 | 1.25571839 | 9.89443161 | 0.00344703 | 0.0354438  |
| ENSBTAG000000020272 | <i>SIK2</i>         | 539570    | protein-coding | -0.5406398 | 4.36393658 | 9.84122832 | 0.0035248  | 0.03608369 |
| ENSBTAG000000011869 | <i>CSRP3</i>        | 540407    | protein-coding | -1.0834757 | 9.50158273 | 9.81633258 | 0.00356183 | 0.03640984 |
| ENSBTAG000000004272 | <i>ISG12(B)</i>     | 617420    | protein-coding | 2.87533338 | -0.8251973 | 9.80314075 | 0.00358163 | 0.03653258 |
| ENSBTAG000000007492 | <i>ADAMTSL2</i>     | 526780    | protein-coding | 0.65326795 | 2.2193413  | 9.80028357 | 0.00358593 | 0.03654997 |
| ENSBTAG000000005359 | <i>TGFB2</i>        | 534069    | protein-coding | 0.52474265 | 3.57844759 | 9.75880184 | 0.00364902 | 0.03687549 |
| ENSBTAG000000012074 | <i>MYB</i>          | 317776    | protein-coding | 1.88784395 | -1.0030062 | 9.75861682 | 0.0036493  | 0.03687549 |
| ENSBTAG000000003525 | <i>STXBP1</i>       | 282378    | protein-coding | 0.63171646 | 4.17738893 | 9.73104122 | 0.0036919  | 0.03714154 |
| ENSBTAG000000013631 | <i>GLUL</i>         | 281199    | protein-coding | -0.6500844 | 9.65137594 | 9.72885615 | 0.0036953  | 0.03714154 |
| ENSBTAG000000012566 | <i>MAP10</i>        | 781199    | protein-coding | -0.7829572 | 0.72161869 | 9.72116187 | 0.00370729 | 0.03714154 |
| ENSBTAG000000021837 | <i>RGS19</i>        | 539036    | protein-coding | 0.84765919 | 1.08974977 | 9.71420972 | 0.00371817 | 0.03722398 |
| ENSBTAG000000010068 | <i>REEP2</i>        | 532432    | protein-coding | 0.6772289  | 2.80902789 | 9.70139598 | 0.0037383  | 0.03734581 |
| ENSBTAG000000016661 | <i>USP18</i>        | 515202    | protein-coding | 1.00884909 | 2.02830642 | 9.69856643 | 0.00374276 | 0.03735942 |
| ENSBTAG000000031178 | <i>SLC9A9</i>       | 535743    | protein-coding | 0.68124156 | 1.52008046 | 9.69716559 | 0.00374497 | 0.03735942 |
| ENSBTAG000000015032 | <i>CD14</i>         | 281048    | protein-coding | 0.7599715  | 1.71932428 | 9.67822095 | 0.003775   | 0.03758876 |
| ENSBTAG000000030667 | <i>ODAD1</i>        | 617306    | protein-coding | 0.86326552 | 0.93671953 | 9.67761244 | 0.00377597 | 0.03758876 |
| ENSBTAG000000015434 | <i>DSTN</i>         | 513267    | protein-coding | -0.6298322 | 3.94658062 | 9.65871513 | 0.00380619 | 0.0378361  |
| ENSBTAG000000002425 | <i>SCN9A</i>        | 533065    | protein-coding | 1.30223662 | 0.19367975 | 9.65308681 | 0.00381524 | 0.03789931 |
| ENSBTAG000000030556 | <i>ZNF217</i>       | 507766    | protein-coding | -0.5649272 | 2.0204835  | 9.62808972 | 0.00385572 | 0.0382109  |
| ENSBTAG000000022886 | <i>RYS2</i>         | 537376    | protein-coding | -1.0926267 | 0.58354842 | 9.61659317 | 0.00387449 | 0.03835255 |
| ENSBTAG000000005278 | <i>WEE1</i>         | 540322    | protein-coding | 0.50113207 | 3.11620928 | 9.59049697 | 0.00391746 | 0.03864207 |
| ENSBTAG000000048625 |                     |           |                | -0.626593  | 1.28804681 | 9.57569153 | 0.00394207 | 0.03876041 |
| ENSBTAG000000009489 | <i>CACNA2D2</i>     | 785909    | protein-coding | 0.80273683 | 4.33401354 | 9.55962754 | 0.00396896 | 0.03890464 |
| ENSBTAG000000000892 | <i>CGAS</i>         | 782472    | protein-coding | 1.25511354 | -0.0668296 | 9.55243244 | 0.00398107 | 0.03899615 |
| ENSBTAG000000033961 | <i>RNF217</i>       | 541287    | protein-coding | -0.554362  | 3.68276877 | 9.53967119 | 0.00400263 | 0.03912575 |
| ENSBTAG000000018366 | <i>SLC15A3</i>      | 513984    | protein-coding | 0.92965226 | 0.47378785 | 9.53359092 | 0.00401296 | 0.03915935 |
| ENSBTAG000000009358 | <i>MTSS2</i>        | 521855    | protein-coding | 0.53342822 | 3.11627201 | 9.52431688 | 0.00402875 | 0.03917463 |
| ENSBTAG000000007449 | <i>HS3ST1</i>       | 538691    | protein-coding | 1.08381339 | 0.03431955 | 9.5236453  | 0.0040299  | 0.03917463 |



|                    |                  |           |                |            |            |            |            |            |
|--------------------|------------------|-----------|----------------|------------|------------|------------|------------|------------|
| ENSBTAG00000051212 | <i>TMEM86B</i>   | 518466    | protein-coding | 1.0681033  | -0.1098123 | 9.50896642 | 0.00405505 | 0.03936472 |
| ENSBTAG00000050932 |                  |           |                | -0.8016513 | 0.97747847 | 9.50677208 | 0.00405882 | 0.0393742  |
| ENSBTAG0000005445  | <i>SLC35D1</i>   | 613734    | protein-coding | -0.559224  | 2.03365397 | 9.50096787 | 0.00406882 | 0.03939735 |
| ENSBTAG00000017542 | <i>PPARD</i>     | 353106    | protein-coding | 0.81026895 | 4.68360399 | 9.50066605 | 0.00406934 | 0.03939735 |
| ENSBTAG00000005748 | <i>SOX17</i>     | 534010    | protein-coding | 0.61157355 | 2.66129697 | 9.50051439 | 0.0040696  | 0.03939735 |
| ENSBTAG00000052673 |                  |           |                | -0.5512971 | 2.49828316 | 9.45731603 | 0.00414488 | 0.03987925 |
| ENSBTAG00000015080 | <i>PHACTR3</i>   | 515071    | protein-coding | 1.46945812 | -0.6493593 | 9.45183722 | 0.00415453 | 0.03994483 |
| ENSBTAG00000012073 | <i>VOPPI</i>     | 767861    | protein-coding | -0.678079  | 2.37987641 | 9.44848452 | 0.00416045 | 0.03994944 |
| ENSBTAG00000010954 | <i>ART3</i>      | 407147    | protein-coding | -0.5838534 | 6.55115896 | 9.44606678 | 0.00416473 | 0.03994944 |
| ENSBTAG00000048237 | <i>FGF9</i>      | 613731    | protein-coding | -0.9111063 | 0.44401166 | 9.40769932 | 0.00423319 | 0.04047988 |
| ENSBTAG00000009984 | <i>SGPL1</i>     | 522515    | protein-coding | 0.55566537 | 3.14053494 | 9.39913153 | 0.00424864 | 0.04059003 |
| ENSBTAG00000013118 | <i>CD86</i>      | 414345    | protein-coding | 0.86687726 | 1.03969374 | 9.39408049 | 0.00425778 | 0.04063221 |
| ENSBTAG00000050186 |                  |           |                | 0.78432975 | 2.31209194 | 9.37414469 | 0.00429405 | 0.04086754 |
| ENSBTAG00000003521 | <i>KIAA0895L</i> | 512420    | protein-coding | 1.17312613 | -0.3048805 | 9.36862501 | 0.00430415 | 0.04093599 |
| ENSBTAG00000019459 | <i>CHAC2</i>     | 511605    | protein-coding | -0.5678938 | 2.13697312 | 9.33729736 | 0.00436197 | 0.0413565  |
| ENSBTAG00000026067 | <i>SH2D1A</i>    | 613356    | protein-coding | 1.29797781 | -0.4966977 | 9.33629296 | 0.00436384 | 0.0413565  |
| ENSBTAG00000039129 | <i>LOC510798</i> | 510798    | protein-coding | 0.81778108 | 1.2192289  | 9.31310308 | 0.00440719 | 0.04158516 |
| ENSBTAG00000014829 | <i>MYRFL</i>     | 781109    | protein-coding | 1.23011044 | -0.4951223 | 9.31274726 | 0.00440786 | 0.04158516 |
| ENSBTAG00000001324 | <i>SLCO2A1</i>   | 282468    | protein-coding | -0.6611118 | 2.67015976 | 9.29255468 | 0.00444599 | 0.04183276 |
| ENSBTAG00000009979 | <i>HOBX2</i>     | 616129    | protein-coding | 0.6413051  | 1.04313998 | 9.27063464 | 0.00448779 | 0.04204494 |
| ENSBTAG00000008499 | <i>TROAP</i>     | 505791    | protein-coding | 1.0151652  | 0.6877321  | 9.2641285  | 0.00450028 | 0.04211828 |
| ENSBTAG00000001979 | <i>TAF7L</i>     | 615711    | protein-coding | 0.93662651 | 0.86924192 | 9.25283449 | 0.00452204 | 0.04224241 |
| ENSBTAG00000030208 | <i>ERFE</i>      | 101905782 | protein-coding | 1.22650839 | 0.56443188 | 9.24262895 | 0.0045418  | 0.0423661  |
| ENSBTAG00000015104 | <i>CCDC28B</i>   | 507607    | protein-coding | 0.58014812 | 1.59858428 | 9.23143468 | 0.00456359 | 0.04251296 |
| ENSBTAG00000011234 | <i>FOXO3</i>     | 535530    | protein-coding | -0.6522105 | 4.33612861 | 9.21690442 | 0.00459203 | 0.04266558 |
| ENSBTAG00000014048 | <i>SHLD1</i>     | 615129    | protein-coding | -0.8397138 | 0.93598068 | 9.2159985  | 0.00459381 | 0.04266558 |
| ENSBTAG00000010948 | <i>CLIC2</i>     | 532777    | protein-coding | 0.57300365 | 3.66305256 | 9.19321749 | 0.00463881 | 0.04298612 |
| ENSBTAG00000002083 | <i>AUTS2</i>     | 615936    | protein-coding | -0.5057872 | 5.56097847 | 9.17569494 | 0.00467374 | 0.04323164 |
| ENSBTAG00000004641 | <i>PLEKHA6</i>   | 107133475 | protein-coding | 0.6240319  | 1.53331356 | 9.17489935 | 0.00467534 | 0.04323164 |
| ENSBTAG00000011511 | <i>IFI16</i>     | 506759    | protein-coding | 0.70747391 | 2.82040754 | 9.16161889 | 0.00470201 | 0.04342881 |
| ENSBTAG00000011578 | <i>CD44</i>      | 281057    | protein-coding | 0.65335234 | 4.0944273  | 9.15552988 | 0.0047143  | 0.043489   |
| ENSBTAG00000020764 | <i>CNN2</i>      | 539019    | protein-coding | 0.64368035 | 3.44031124 | 9.15483594 | 0.0047157  | 0.043489   |
| ENSBTAG00000010977 | <i>FRZB</i>      | 281170    | protein-coding | 0.84141029 | 5.05143446 | 9.15379739 | 0.0047178  | 0.043489   |
| ENSBTAG00000010866 | <i>BMPER</i>     | 534101    | protein-coding | 1.25191172 | -0.3137957 | 9.13803856 | 0.00474977 | 0.04373884 |
| ENSBTAG00000019708 | <i>ACSL6</i>     | 506059    | protein-coding | 0.94361702 | 0.4118797  | 9.13613108 | 0.00475366 | 0.04373884 |
| ENSBTAG00000014069 | <i>PDK4</i>      | 507367    | protein-coding | -1.5244738 | 10.9012435 | 9.12582965 | 0.00477471 | 0.04388545 |
| ENSBTAG00000017639 | <i>RPS6KA3</i>   | 511190    | protein-coding | -0.6320713 | 6.55603102 | 9.12057347 | 0.00478549 | 0.04392302 |
| ENSBTAG00000007783 | <i>MYBL2</i>     | 510420    | protein-coding | 0.64090523 | 1.38883039 | 9.099823   | 0.00482829 | 0.04418924 |
| ENSBTAG00000010549 | <i>IFRD1</i>     | 541283    | protein-coding | 0.81584003 | 5.68647851 | 9.08906762 | 0.00485064 | 0.04436492 |
| ENSBTAG00000023632 | <i>FBXL8</i>     | 614765    | protein-coding | 0.69361486 | 0.88514107 | 9.07865336 | 0.00487239 | 0.04453487 |
| ENSBTAG00000039662 | <i>LOC515551</i> | 515551    | protein-coding | -0.6767877 | 5.2715306  | 9.07364219 | 0.00488289 | 0.04460189 |
| ENSBTAG00000001104 | <i>CMTM4</i>     | 540247    | protein-coding | -1.1042824 | -0.6016284 | 9.05635812 | 0.00491929 | 0.04480465 |
| ENSBTAG00000005364 | <i>HMBS</i>      | 515614    | protein-coding | 0.61918687 | 4.99919998 | 9.05115258 | 0.00493031 | 0.04486043 |

|                    |                 |           |                |            |            |            |            |            |
|--------------------|-----------------|-----------|----------------|------------|------------|------------|------------|------------|
| ENSBTAG00000005150 | <i>HMGB3</i>    | 613729    | protein-coding | 0.91860116 | 0.43875777 | 9.03550564 | 0.0049636  | 0.04513413 |
| ENSBTAG00000013645 | <i>RFFL</i>     | 530263    | protein-coding | -0.7537936 | 1.3519845  | 9.02570226 | 0.00498458 | 0.04529563 |
| ENSBTAG00000032617 | <i>FBXO44</i>   | 785057    | protein-coding | 0.62446879 | 2.64010839 | 9.02125849 | 0.00499412 | 0.04532381 |
| ENSBTAG00000017188 | <i>ISM1</i>     | 506902    | protein-coding | -0.6254414 | 1.57768077 | 9.01889671 | 0.0049992  | 0.04532641 |
| ENSBTAG00000034501 | <i>CFI</i>      | 513197    | protein-coding | 1.71426029 | -0.7042897 | 9.01657064 | 0.00500421 | 0.04532641 |
| ENSBTAG00000018920 | <i>TRIM47</i>   | 618638    | protein-coding | 0.54377658 | 2.83495855 | 9.00145029 | 0.00503689 | 0.04547737 |
| ENSBTAG00000006471 | <i>OSBPL11</i>  | 538576    | protein-coding | -0.5610707 | 4.8109195  | 8.99776624 | 0.00504488 | 0.04552038 |
| ENSBTAG00000007020 | <i>ZNF502</i>   | 539265    | protein-coding | -0.7449861 | 0.93645098 | 8.9934484  | 0.00505427 | 0.04554672 |
| ENSBTAG00000006025 | <i>AHSA2</i>    | 531017    | protein-coding | 0.54752114 | 1.05015964 | 8.98100215 | 0.00508145 | 0.0457623  |
| ENSBTAG00000052708 | <i>RC3H1</i>    | 100336754 | protein-coding | -0.5306711 | 5.25408786 | 8.97298983 | 0.00509902 | 0.04580523 |
| ENSBTAG00000013486 | <i>KICS2</i>    | 535460    | protein-coding | -0.8855446 | 0.47509749 | 8.97141517 | 0.00510249 | 0.04580523 |
| ENSBTAG00000009686 | <i>FBXO15</i>   | 505376    | protein-coding | -0.7290609 | 1.03219422 | 8.95234814 | 0.00514461 | 0.04606582 |
| ENSBTAG00000016683 | <i>NFKBIA</i>   | 282291    | protein-coding | -0.7082118 | 5.6868504  | 8.94693391 | 0.00515663 | 0.04614417 |
| ENSBTAG00000023372 | <i>MYCN</i>     | 616888    | protein-coding | 1.59058612 | -0.3502266 | 8.93431612 | 0.00518478 | 0.04615953 |
| ENSBTAG00000002574 | <i>MYOZ2</i>    | 540487    | protein-coding | -0.526481  | 8.12023852 | 8.93381891 | 0.00518589 | 0.04615953 |
| ENSBTAG00000021130 | <i>MFSD10</i>   | 507194    | protein-coding | 0.53029271 | 3.10506996 | 8.92511918 | 0.0052054  | 0.04621534 |
| ENSBTAG00000003845 | <i>CSRNP1</i>   | 515406    | protein-coding | 1.09109396 | 3.66261395 | 8.91933246 | 0.00521842 | 0.046228   |
| ENSBTAG00000051625 |                 |           |                | 1.64346824 | -0.1550817 | 8.90162544 | 0.00525848 | 0.04643562 |
| ENSBTAG00000008739 | <i>SAMD11</i>   | 100140500 | protein-coding | 0.63163005 | 3.04453909 | 8.89901236 | 0.00526442 | 0.04645892 |
| ENSBTAG00000031614 | <i>BOLL</i>     | 527841    | protein-coding | 0.61434556 | 1.67039193 | 8.89707245 | 0.00526883 | 0.04646874 |
| ENSBTAG00000018300 | <i>TNFRSF19</i> | 768037    | protein-coding | -0.6834239 | 3.03948596 | 8.8914321  | 0.00528169 | 0.04655295 |
| ENSBTAG00000019772 | <i>OXTR</i>     | 281371    | protein-coding | 1.18881297 | -0.4839143 | 8.8865774  | 0.00529278 | 0.04659237 |
| ENSBTAG00000046752 | <i>PRRT2</i>    | 112444325 | protein-coding | 0.79608456 | 1.20700324 | 8.85551399 | 0.00536435 | 0.04701658 |
| ENSBTAG00000004780 | <i>CDKL1</i>    | 523900    | protein-coding | -1.4527835 | -0.8683909 | 8.83964775 | 0.00540131 | 0.04720388 |
| ENSBTAG00000001176 | <i>LRRN1</i>    | 539619    | protein-coding | 0.74352329 | 3.55349631 | 8.83279126 | 0.00541736 | 0.04727515 |
| ENSBTAG00000019814 | <i>PGBD2</i>    | 101907155 | protein-coding | -0.9574767 | 0.68434631 | 8.81780906 | 0.00545262 | 0.04755337 |
| ENSBTAG00000011912 | <i>SLC25A25</i> | 527786    | protein-coding | 0.60840786 | 7.35727945 | 8.81060633 | 0.00546966 | 0.04767244 |
| ENSBTAG00000003749 | <i>KCNMB4</i>   | 520448    | protein-coding | -0.654477  | 3.0055431  | 8.79559845 | 0.00550535 | 0.04791985 |
| ENSBTAG00000053310 | <i>CIQTNF9</i>  | 523616    | protein-coding | -0.5426943 | 4.74671839 | 8.79437793 | 0.00550826 | 0.04791985 |
| ENSBTAG00000013923 | <i>QPCT</i>     | 281437    | protein-coding | 0.68008617 | 1.52042334 | 8.77558724 | 0.00555332 | 0.04810375 |
| ENSBTAG00000027151 | <i>ARHGAP26</i> | 538219    | protein-coding | 0.64818743 | 2.7385088  | 8.75801789 | 0.00559582 | 0.04837183 |
| ENSBTAG00000009355 | <i>SNAP91</i>   | 516917    | protein-coding | -1.7179235 | -0.7019148 | 8.75569637 | 0.00560146 | 0.04837183 |
| ENSBTAG00000025308 | <i>STON2</i>    | 785664    | protein-coding | -0.5916584 | 3.85421473 | 8.74762311 | 0.00562112 | 0.04848215 |
| ENSBTAG00000003253 | <i>NPPC</i>     | 281356    | protein-coding | 1.51696917 | 0.82246778 | 8.73232108 | 0.00565859 | 0.04868602 |
| ENSBTAG00000019993 | <i>APLN</i>     | 282143    | protein-coding | 1.22412947 | -0.1518939 | 8.72807155 | 0.00566904 | 0.04874617 |
| ENSBTAG00000022986 | <i>TAF45</i>    | 767927    | protein-coding | -1.2080972 | 0.04124251 | 8.70302046 | 0.00573109 | 0.04918957 |
| ENSBTAG00000050339 |                 |           |                | 1.39739024 | -0.4090534 | 8.68460583 | 0.00577717 | 0.04943433 |
| ENSBTAG00000008088 | <i>KIF18B</i>   | 511170    | protein-coding | 1.16791653 | -0.0660283 | 8.67516781 | 0.00580094 | 0.04947174 |
| ENSBTAG00000001786 | <i>HYKK</i>     | 530270    | protein-coding | 0.53194788 | 2.06436908 | 8.6727167  | 0.00580713 | 0.04947174 |
| ENSBTAG00000021393 | <i>FLRT2</i>    | 539905    | protein-coding | 0.55399776 | 2.73060362 | 8.67095562 | 0.00581158 | 0.04947174 |
| ENSBTAG00000009786 | <i>SCIN</i>     | 281478    | protein-coding | 0.94018749 | 2.24209935 | 8.66527386 | 0.00582597 | 0.04950627 |
| ENSBTAG00000005073 | <i>ZNHIT2</i>   | 539138    | protein-coding | -0.8907213 | 0.3126492  | 8.65431182 | 0.00585384 | 0.04960786 |
| ENSBTAG00000011921 | <i>TIGIT</i>    | 100140801 | protein-coding | 2.21743855 | -0.6351425 | 8.63211369 | 0.00591071 | 0.04996949 |

#### 4. Prospected DEGs to T2 vs T1 in Early Weaning group

| ENSEMBL             | SYMBOL           | ENTREZID  | GENETYPE       | logFC      | logCPM     | F          | PValue   | FDR        |
|---------------------|------------------|-----------|----------------|------------|------------|------------|----------|------------|
| ENSBTAG00000025848  | <i>RBM3</i>      | 509771    | protein-coding | 1.34013659 | 5.12694798 | 110.094328 | 3.58E-12 | 5.04E-08   |
| ENSBTAG00000013926  | <i>FCGRT</i>     | 338062    | protein-coding | -1.2226647 | 7.08418064 | 102.451542 | 9.09E-12 | 6.39E-08   |
| ENSBTAG00000005754  | <i>PPM1K</i>     | 540329    | protein-coding | 2.05408662 | 5.35383935 | 89.7855003 | 4.80E-11 | 2.25E-07   |
| ENSBTAG00000010786  | <i>TACC2</i>     | 533768    | protein-coding | -1.0230238 | 8.37452628 | 74.4270842 | 4.65E-10 | 1.56E-06   |
| ENSBTAG00000015038  | <i>HADHA</i>     | 281810    | protein-coding | -0.7644256 | 7.31435248 | 72.2267162 | 6.60E-10 | 1.56E-06   |
| ENSBTAG00000022058  | <i>UNG</i>       | 511381    | protein-coding | -1.4118851 | 7.9015851  | 71.4696569 | 7.46E-10 | 1.56E-06   |
| ENSBTAG00000003512  | <i>MYH7B</i>     | 521764    | protein-coding | 1.3417343  | 7.71129595 | 71.2164579 | 7.78E-10 | 1.56E-06   |
| ENSBTAG00000014197  | <i>SLC38A4</i>   | 527476    | protein-coding | -2.4017923 | 1.31931627 | 68.5251331 | 1.21E-09 | 2.14E-06   |
| ENSBTAG00000003514  | <i>HSF4</i>      | 614788    | protein-coding | 1.00513833 | 4.74972679 | 66.4790531 | 1.72E-09 | 2.68E-06   |
| ENSBTAG00000005012  | <i>HSPH1</i>     | 507165    | protein-coding | -1.3114046 | 5.28098267 | 63.5651354 | 2.84E-09 | 4.00E-06   |
| ENSBTAG00000001879  | <i>PER2</i>      | 512237    | protein-coding | 1.55766992 | 4.19762175 | 62.8193536 | 3.24E-09 | 4.15E-06   |
| ENSBTAG00000048271  | <i>MICAL3</i>    | 532244    | protein-coding | -1.0006601 | 6.4044722  | 61.9576067 | 3.78E-09 | 4.44E-06   |
| ENSBTAG000000051759 |                  |           |                | -0.7706957 | 4.09858522 | 55.6023285 | 1.23E-08 | 1.33E-05   |
| ENSBTAG00000013152  | <i>NIPSNAP1</i>  | 614972    | protein-coding | 1.34531785 | 3.29634852 | 55.1669746 | 1.34E-08 | 1.35E-05   |
| ENSBTAG00000007480  | <i>CIRBP</i>     | 507120    | protein-coding | 1.04839177 | 6.35886071 | 53.9715329 | 1.69E-08 | 1.58E-05   |
| ENSBTAG00000016048  | <i>CPT1B</i>     | 509459    | protein-coding | -0.8171802 | 6.07723072 | 52.451342  | 2.28E-08 | 2.01E-05   |
| ENSBTAG00000003120  | <i>ZNF385B</i>   | 613328    | protein-coding | 1.86494407 | 1.85641527 | 51.5582965 | 2.73E-08 | 2.19E-05   |
| ENSBTAG00000007484  | <i>ACADS</i>     | 511222    | protein-coding | -0.6392981 | 5.90510455 | 51.106766  | 2.99E-08 | 2.19E-05   |
| ENSBTAG000000021912 | <i>DUSP7</i>     | 785016    | protein-coding | -0.6661809 | 5.18556464 | 51.004337  | 3.05E-08 | 2.19E-05   |
| ENSBTAG00000014831  | <i>PPP1R3C</i>   | 539466    | protein-coding | 1.346988   | 7.20342178 | 50.8982563 | 3.12E-08 | 2.19E-05   |
| ENSBTAG00000003072  | <i>ACADVL</i>    | 282130    | protein-coding | -0.7504063 | 8.04272919 | 49.3637854 | 4.27E-08 | 2.77E-05   |
| ENSBTAG000000022294 | <i>FADS1</i>     | 533107    | protein-coding | 1.31799008 | 3.28921006 | 49.2997038 | 4.33E-08 | 2.77E-05   |
| ENSBTAG000000021970 | <i>EYA4</i>      | 538786    | protein-coding | -0.9746681 | 6.82448232 | 47.8665096 | 5.84E-08 | 3.57E-05   |
| ENSBTAG00000002185  | <i>RNF7</i>      | 515595    | protein-coding | 0.70386991 | 5.13247922 | 47.6140786 | 6.16E-08 | 3.61E-05   |
| ENSBTAG00000046841  | <i>IRF2BP2</i>   | 781665    | protein-coding | -0.85875   | 5.85808179 | 47.1724854 | 6.76E-08 | 3.81E-05   |
| ENSBTAG00000015119  | <i>SIK3</i>      | 506539    | protein-coding | -0.797981  | 5.50892163 | 46.3212299 | 8.11E-08 | 4.39E-05   |
| ENSBTAG00000018258  | <i>SRSF2</i>     | 508312    | protein-coding | 0.52035258 | 7.27590453 | 45.9145813 | 8.86E-08 | 4.47E-05   |
| ENSBTAG00000016679  | <i>ETFDH</i>     | 768074    | protein-coding | -0.6008874 | 6.39359375 | 45.786221  | 9.11E-08 | 4.47E-05   |
| ENSBTAG00000004248  | <i>MLYCD</i>     | 512341    | protein-coding | -1.2734098 | 5.24311698 | 45.7371817 | 9.20E-08 | 4.47E-05   |
| ENSBTAG00000010002  | <i>IRF2</i>      | 337916    | protein-coding | -0.6424887 | 4.11367125 | 44.9566642 | 1.09E-07 | 5.12E-05   |
| ENSBTAG00000017697  | <i>CTF1</i>      | 514803    | protein-coding | 1.08352365 | 3.21977452 | 44.6427254 | 1.17E-07 | 5.31E-05   |
| ENSBTAG00000018248  | <i>MGLL</i>      | 505290    | protein-coding | -0.7516607 | 6.39316835 | 44.0873057 | 1.32E-07 | 5.81E-05   |
| ENSBTAG00000046664  | <i>TSC22D1</i>   | 510359    | protein-coding | -0.8166006 | 5.72630658 | 43.2765504 | 1.58E-07 | 6.75E-05   |
| ENSBTAG00000012370  | <i>MGP</i>       | 282660    | protein-coding | -0.99595   | 5.65136816 | 42.764061  | 1.78E-07 | 7.35E-05   |
| ENSBTAG00000001851  | <i>LOC508916</i> | 508916    | protein-coding | 2.50259242 | 2.41501041 | 42.2252139 | 2.01E-07 | 8.07E-05   |
| ENSBTAG00000008940  | <i>NPTX1</i>     | 513538    | protein-coding | -2.6860904 | 2.238817   | 41.5351897 | 2.35E-07 | 9.18E-05   |
| ENSBTAG000000054844 | <i>HBA1</i>      | 100140149 | protein-coding | -3.9328313 | -0.0496511 | 41.3905889 | 2.43E-07 | 9.23E-05   |
| ENSBTAG00000013306  | <i>ZBTB7C</i>    | 614110    | protein-coding | 1.14857357 | 1.85832752 | 40.8341754 | 2.76E-07 | 0.00010071 |
| ENSBTAG000000054680 | <i>ST3GAL2</i>   | 444879    | protein-coding | -0.8416521 | 5.79325056 | 40.6912225 | 2.85E-07 | 0.00010071 |
| ENSBTAG00000017071  | <i>CIQTNF3</i>   | 531659    | protein-coding | 1.05927623 | 4.53285159 | 40.6752132 | 2.86E-07 | 0.00010071 |
| ENSBTAG000000054250 |                  |           |                | 1.04072585 | 2.68683351 | 40.460766  | 3.01E-07 | 0.00010071 |

|                    |                 |           |                |            |            |            |          |            |
|--------------------|-----------------|-----------|----------------|------------|------------|------------|----------|------------|
| ENSBTAG00000014158 | <i>CCNT2</i>    | 521089    | protein-coding | 0.58731569 | 5.60589022 | 40.3816485 | 3.07E-07 | 0.00010071 |
| ENSBTAG00000007884 | <i>SREBF1</i>   | 539361    | protein-coding | 1.08865126 | 6.48331898 | 40.3663992 | 3.08E-07 | 0.00010071 |
| ENSBTAG00000052213 | <i>ADIPOQ</i>   | 282865    | protein-coding | 5.82323943 | 1.51973568 | 40.1581902 | 3.23E-07 | 0.00010312 |
| ENSBTAG00000017360 | <i>HDAC3</i>    | 404125    | protein-coding | 0.52584349 | 4.56541259 | 38.8873941 | 4.36E-07 | 0.00012781 |
| ENSBTAG00000016532 | <i>MAPKAPK3</i> | 615215    | protein-coding | -0.5971949 | 5.59402952 | 38.0264059 | 5.36E-07 | 0.00015386 |
| ENSBTAG00000053162 |                 |           |                | -0.6173936 | 5.73037353 | 37.6202447 | 5.91E-07 | 0.00016525 |
| ENSBTAG00000000251 | <i>ALAD</i>     | 510679    | protein-coding | -0.8334022 | 5.51508332 | 37.4692897 | 6.13E-07 | 0.00016525 |
| ENSBTAG00000006370 | <i>CCT3</i>     | 504735    | protein-coding | -0.613183  | 6.44522562 | 37.4344559 | 6.18E-07 | 0.00016525 |
| ENSBTAG00000032292 | <i>CCDC159</i>  | 785202    | protein-coding | 1.18373734 | 3.2834362  | 37.4073194 | 6.22E-07 | 0.00016525 |
| ENSBTAG00000055207 | <i>SCD</i>      | 280924    | protein-coding | 1.53029367 | 6.29933393 | 37.1192354 | 6.67E-07 | 0.00017398 |
| ENSBTAG00000000342 | <i>PLOD3</i>    | 514996    | protein-coding | -0.6389802 | 3.95286196 | 36.5506676 | 7.67E-07 | 0.00019466 |
| ENSBTAG00000038464 | <i>PLIN5</i>    | 531199    | protein-coding | -1.0728858 | 4.62063681 | 36.5129622 | 7.74E-07 | 0.00019466 |
| ENSBTAG00000021508 | <i>LMOD3</i>    | 509978    | protein-coding | 1.08387167 | 8.16729715 | 36.3251366 | 8.11E-07 | 0.00020032 |
| ENSBTAG00000001417 | <i>ACSM1</i>    | 282576    | protein-coding | 6.41836068 | -0.1313018 | 35.7607177 | 9.33E-07 | 0.00022584 |
| ENSBTAG00000011879 | <i>B4GALT2</i>  | 100125390 | protein-coding | 0.50128668 | 4.62132255 | 35.7029806 | 9.47E-07 | 0.00022584 |
| ENSBTAG00000025458 | <i>DPF3</i>     | 787359    | protein-coding | -1.0636372 | 2.72668686 | 35.4844495 | 1.00E-06 | 0.00023453 |
| ENSBTAG00000023891 | <i>RBM20</i>    | 525419    | protein-coding | 0.851454   | 4.99513763 | 35.4142898 | 1.02E-06 | 0.00023478 |
| ENSBTAG00000037526 | <i>FABP4</i>    | 281759    | protein-coding | 4.85687042 | 2.1718995  | 35.1879302 | 1.08E-06 | 0.00024378 |
| ENSBTAG00000003952 | <i>FBXL2</i>    | 616212    | protein-coding | 1.12264175 | 1.19474151 | 35.1357504 | 1.09E-06 | 0.00024378 |
| ENSBTAG00000011067 | <i>IL17RA</i>   | 525040    | protein-coding | -0.7397106 | 3.47343039 | 34.9781147 | 1.14E-06 | 0.00024753 |
| ENSBTAG00000052909 | <i>C8G</i>      | 517356    | protein-coding | 0.78665396 | 3.42797568 | 34.1553609 | 1.40E-06 | 0.00029833 |
| ENSBTAG00000021962 | <i>BCLAF3</i>   | 511003    | protein-coding | 0.81271015 | 3.94918414 | 33.8776917 | 1.50E-06 | 0.00031316 |
| ENSBTAG00000019379 | <i>TRARG1</i>   | 527604    | protein-coding | 6.17617152 | 0.84803778 | 33.849138  | 1.51E-06 | 0.00031316 |
| ENSBTAG00000014151 | <i>RCSD1</i>    | 512205    | protein-coding | 0.65155764 | 6.41129436 | 33.6610862 | 1.59E-06 | 0.00032389 |
| ENSBTAG00000013666 | <i>SLC25A29</i> | 507686    | protein-coding | 0.93237067 | 3.0706802  | 33.4636832 | 1.67E-06 | 0.00033593 |
| ENSBTAG00000010389 | <i>STBD1</i>    | 513376    | protein-coding | 1.45879953 | 6.7890088  | 33.2560949 | 1.76E-06 | 0.00034945 |
| ENSBTAG00000008192 | <i>PLPPR2</i>   | 520247    | protein-coding | 1.08054217 | 4.57685553 | 32.819122  | 1.97E-06 | 0.00037794 |
| ENSBTAG00000019554 | <i>FBP2</i>     | 514066    | protein-coding | -0.6368541 | 9.20058468 | 32.7742896 | 2.00E-06 | 0.00037794 |
| ENSBTAG00000016265 | <i>DNAJA1</i>   | 528862    | protein-coding | -0.664111  | 4.60442937 | 32.5528768 | 2.12E-06 | 0.00039205 |
| ENSBTAG00000037644 | <i>HBB</i>      | 280813    | protein-coding | -2.6716753 | 1.38130493 | 32.4126187 | 2.20E-06 | 0.00039756 |
| ENSBTAG00000038523 | <i>ATPIA4</i>   | 537960    | protein-coding | 1.49995095 | 3.18901863 | 32.4005361 | 2.20E-06 | 0.00039756 |
| ENSBTAG00000007993 | <i>CORO1C</i>   | 515798    | protein-coding | -0.5691867 | 4.32832386 | 31.9032142 | 2.51E-06 | 0.00044748 |
| ENSBTAG00000052243 |                 |           |                | -0.6417944 | 4.20973111 | 31.7044604 | 2.65E-06 | 0.00046003 |
| ENSBTAG00000054053 |                 |           |                | 0.59092146 | 2.85079911 | 31.4372632 | 2.84E-06 | 0.00048201 |
| ENSBTAG00000016580 | <i>TEF</i>      | 616076    | protein-coding | 0.76510693 | 4.84639851 | 31.0313441 | 3.17E-06 | 0.00053087 |
| ENSBTAG00000008409 | <i>MYC</i>      | 511077    | protein-coding | -1.2657862 | 3.20001555 | 30.9501541 | 3.24E-06 | 0.00053619 |
| ENSBTAG00000002644 | <i>KCNQ4</i>    | 528741    | protein-coding | -0.7846478 | 5.7925016  | 30.8139373 | 3.36E-06 | 0.0005449  |
| ENSBTAG00000015509 | <i>NAMPT</i>    | 520472    | protein-coding | -1.1021045 | 6.65944432 | 30.8027743 | 3.37E-06 | 0.0005449  |
| ENSBTAG00000006754 | <i>DBP</i>      | 503577    | protein-coding | 1.15988881 | 2.43657003 | 30.7612895 | 3.41E-06 | 0.0005449  |
| ENSBTAG00000016139 | <i>TMEM120A</i> | 520173    | protein-coding | -1.0889404 | 4.32015572 | 30.4936824 | 3.66E-06 | 0.00057916 |
| ENSBTAG00000019302 | <i>BCL2</i>     | 281020    | protein-coding | -1.2227831 | 2.14262997 | 30.3426965 | 3.81E-06 | 0.00059371 |
| ENSBTAG00000015543 | <i>ARHGAP35</i> | 540310    | protein-coding | -0.617735  | 6.83932883 | 30.3201426 | 3.84E-06 | 0.00059371 |
| ENSBTAG00000051176 |                 |           |                | 2.08106884 | 1.04324025 | 30.2143483 | 3.95E-06 | 0.00060438 |

|                     |                     |           |                |            |            |            |          |            |
|---------------------|---------------------|-----------|----------------|------------|------------|------------|----------|------------|
| ENSBTAG00000007969  | <i>CIDEA</i>        | 534607    | protein-coding | 4.80171821 | 1.00241546 | 30.1034159 | 4.07E-06 | 0.00060677 |
| ENSBTAG00000013961  | <i>MYSM1</i>        | 515332    | protein-coding | 0.55825102 | 5.33863332 | 30.0633185 | 4.12E-06 | 0.00060677 |
| ENSBTAG00000002348  | <i>SLC4A4</i>       | 282360    | protein-coding | -1.2616923 | 3.64431913 | 30.0115927 | 4.17E-06 | 0.00060677 |
| ENSBTAG00000004471  | <i>ST3GAL6</i>      | 444860    | protein-coding | 0.71974889 | 5.04121997 | 29.9563944 | 4.24E-06 | 0.00060677 |
| ENSBTAG000000054661 | <i>MIR2887-1</i>    | 100498812 | ncRNA          | 5.01360141 | -0.992082  | 29.9441847 | 4.25E-06 | 0.00060677 |
| ENSBTAG00000007564  | <i>BBS12</i>        | 516376    | protein-coding | -0.7251157 | 2.48690731 | 29.9307554 | 4.27E-06 | 0.00060677 |
| ENSBTAG00000017528  | <i>SNAI3</i>        | 526694    | protein-coding | 2.22183073 | 2.72648565 | 29.7912889 | 4.43E-06 | 0.00062406 |
| ENSBTAG000000024605 | <i>DYNLL1</i>       | 404151    | protein-coding | -0.7146738 | 3.19108492 | 29.6848776 | 4.56E-06 | 0.00063123 |
| ENSBTAG000000031564 | <i>GNL3L</i>        | 507679    | protein-coding | 0.51823831 | 6.0373147  | 29.6636603 | 4.59E-06 | 0.00063123 |
| ENSBTAG000000020125 | <i>RBFOX2</i>       | 514951    | protein-coding | 0.70957597 | 6.10246605 | 29.6418225 | 4.62E-06 | 0.00063123 |
| ENSBTAG000000007943 | <i>AZIN1</i>        | 532835    | protein-coding | 0.56242271 | 6.59589846 | 29.3147499 | 5.05E-06 | 0.00068405 |
| ENSBTAG00000001842  | <i>GSTM3</i>        | 615507    | protein-coding | 0.98647541 | 3.70858117 | 29.1972534 | 5.22E-06 | 0.00069989 |
| ENSBTAG000000002382 | <i>DDX10</i>        | 528483    | protein-coding | -0.7620425 | 1.93088253 | 29.0945314 | 5.37E-06 | 0.00071328 |
| ENSBTAG000000020030 | <i>FTTM2</i>        | 518159    | protein-coding | -0.8398911 | 4.86539871 | 29.0201728 | 5.48E-06 | 0.00072133 |
| ENSBTAG000000014724 | <i>EIF4A2</i>       | 286819    | protein-coding | -0.5026442 | 8.79584183 | 28.885926  | 5.69E-06 | 0.00074179 |
| ENSBTAG000000014828 | <i>CACNA1A</i>      | 282648    | protein-coding | 0.88195617 | 2.0494841  | 28.7425993 | 5.92E-06 | 0.0007649  |
| ENSBTAG000000055085 |                     |           |                | -0.5756706 | 3.9672797  | 28.6013535 | 6.16E-06 | 0.00078841 |
| ENSBTAG000000014484 | <i>TMEM26</i>       | 100125281 | protein-coding | -1.1608298 | 1.73828823 | 28.5529812 | 6.25E-06 | 0.00079194 |
| ENSBTAG000000001305 | <i>ATP2B2</i>       | 613800    | protein-coding | 1.22780793 | 4.28088822 | 28.3579289 | 6.60E-06 | 0.00082894 |
| ENSBTAG000000019818 | <i>CASZ1</i>        | 536765    | protein-coding | -0.7509619 | 4.8855454  | 28.2513919 | 6.80E-06 | 0.00084655 |
| ENSBTAG000000052420 | <i>MIR12060</i>     | 114482212 | ncRNA          | 1.31896233 | 0.64064534 | 28.1633136 | 6.97E-06 | 0.00085269 |
| ENSBTAG000000018936 | <i>LSS</i>          | 615906    | protein-coding | 0.71531286 | 2.83633693 | 28.0906317 | 7.11E-06 | 0.00086113 |
| ENSBTAG000000014459 | <i>MAP6D1</i>       | 614904    | protein-coding | 0.66223847 | 2.79279205 | 28.067131  | 7.16E-06 | 0.00086113 |
| ENSBTAG000000000111 | <i>UGP2</i>         | 281565    | protein-coding | -0.7148354 | 7.98697257 | 28.0000877 | 7.29E-06 | 0.00087013 |
| ENSBTAG000000020869 | <i>DDC</i>          | 280762    | protein-coding | -0.8465146 | 2.27247965 | 27.9510412 | 7.40E-06 | 0.00087485 |
| ENSBTAG000000046990 | <i>GON7</i>         | 505131    | protein-coding | 0.64491605 | 3.20779031 | 27.7755095 | 7.77E-06 | 0.0009042  |
| ENSBTAG000000045762 | <i>SCAMP4</i>       | 538819    | protein-coding | -0.5599034 | 3.43330316 | 27.7193052 | 7.90E-06 | 0.00090686 |
| ENSBTAG000000047441 |                     |           |                | -0.6389342 | 4.77257622 | 27.3251211 | 8.84E-06 | 0.00099236 |
| ENSBTAG000000046263 | <i>ADAMTSL5</i>     | 107131164 | protein-coding | 0.72416871 | 6.64836203 | 27.3061571 | 8.88E-06 | 0.00099236 |
| ENSBTAG000000052115 | <i>LOC100848869</i> | 100848869 | protein-coding | 0.51222434 | 8.61175081 | 27.2593114 | 9.00E-06 | 0.00099781 |
| ENSBTAG000000009637 | <i>SLC12A2</i>      | 286845    | protein-coding | 0.83243291 | 5.03905596 | 27.0367828 | 9.60E-06 | 0.00105518 |
| ENSBTAG000000014215 | <i>CCDC86</i>       | 540913    | protein-coding | -0.730682  | 3.39966444 | 26.9929027 | 9.72E-06 | 0.00106027 |
| ENSBTAG000000047265 | <i>PPP1R14B</i>     | 617154    | protein-coding | 0.61755558 | 5.63721345 | 26.9022895 | 9.97E-06 | 0.00107773 |
| ENSBTAG000000020591 | <i>VAMP4</i>        | 616923    | protein-coding | 0.56090383 | 2.81868342 | 26.860393  | 1.01E-05 | 0.00107773 |
| ENSBTAG000000019225 | <i>SLC39A14</i>     | 515437    | protein-coding | -0.7287271 | 3.87696975 | 26.7883442 | 1.03E-05 | 0.00109074 |
| ENSBTAG000000007187 | <i>INF2</i>         | 538493    | protein-coding | 0.56132806 | 4.46094331 | 26.6838179 | 1.06E-05 | 0.00111472 |
| ENSBTAG000000013615 | <i>CHORDC1</i>      | 505144    | protein-coding | -0.6146665 | 5.44973779 | 26.661251  | 1.07E-05 | 0.00111472 |
| ENSBTAG000000048350 |                     |           |                | -1.8114139 | 3.26038179 | 26.5951545 | 1.09E-05 | 0.00112787 |
| ENSBTAG000000046104 |                     |           |                | 0.90594212 | 2.12060396 | 26.5096292 | 1.12E-05 | 0.00113939 |
| ENSBTAG000000009042 | <i>ATXN7L2</i>      | 541097    | protein-coding | 0.84856531 | 3.91236319 | 26.3746992 | 1.16E-05 | 0.00116793 |
| ENSBTAG000000015578 | <i>SAP30</i>        | 781150    | protein-coding | -0.8292972 | 1.5790817  | 26.3290404 | 1.18E-05 | 0.00117513 |
| ENSBTAG000000000191 | <i>SLC25A20</i>     | 518758    | protein-coding | -0.5168249 | 5.63244504 | 26.0032418 | 1.29E-05 | 0.00128309 |
| ENSBTAG000000033315 | <i>DNAJC1</i>       | 781036    | protein-coding | -0.6769056 | 3.28778936 | 25.8275492 | 1.36E-05 | 0.00132866 |

|                     |                 |           |                |            |            |            |          |            |
|---------------------|-----------------|-----------|----------------|------------|------------|------------|----------|------------|
| ENSBTAG00000052678  | <i>MIR29C</i>   | 791043    | ncRNA          | 1.34791705 | 1.60037987 | 25.8099669 | 1.37E-05 | 0.00132866 |
| ENSBTAG00000016768  | <i>SCN3B</i>    | 540925    | protein-coding | -1.6813728 | 4.03859128 | 25.4583191 | 1.52E-05 | 0.00145461 |
| ENSBTAG00000005630  | <i>VWA7</i>     | 505555    | protein-coding | 0.53618812 | 4.34954841 | 25.4163563 | 1.54E-05 | 0.0014628  |
| ENSBTAG00000003985  | <i>CCDC15</i>   | 512305    | protein-coding | 0.75755914 | 3.7772687  | 25.3924198 | 1.55E-05 | 0.0014633  |
| ENSBTAG00000013855  | <i>ORMDL3</i>   | 615368    | protein-coding | 0.53386215 | 4.99591042 | 25.3555054 | 1.57E-05 | 0.00146949 |
| ENSBTAG00000009788  | <i>ACOT2</i>    | 785383    | protein-coding | -1.5252053 | 0.22037739 | 25.2547181 | 1.61E-05 | 0.00148418 |
| ENSBTAG00000016033  | <i>HOXD9</i>    | 100295338 | protein-coding | -0.6293738 | 3.70957492 | 25.2343264 | 1.62E-05 | 0.00148418 |
| ENSBTAG00000015214  | <i>CA3</i>      | 513212    | protein-coding | 0.72416816 | 10.8927957 | 25.2324843 | 1.62E-05 | 0.00148418 |
| ENSBTAG00000011617  | <i>MAMSTR</i>   | 505540    | protein-coding | -1.0380797 | 5.28737126 | 25.2113421 | 1.63E-05 | 0.00148418 |
| ENSBTAG00000038316  | <i>GPATCH8</i>  | 534759    | protein-coding | 0.51808068 | 6.58935871 | 25.2112075 | 1.63E-05 | 0.00148418 |
| ENSBTAG00000013226  | <i>HUS1</i>     | 514142    | protein-coding | 0.68302736 | 3.15874904 | 25.083576  | 1.70E-05 | 0.00153161 |
| ENSBTAG00000005436  | <i>SHQ1</i>     | 507486    | protein-coding | -0.6173892 | 2.27519569 | 25.0340774 | 1.72E-05 | 0.00154442 |
| ENSBTAG00000015350  | <i>PLIN1</i>    | 520598    | protein-coding | 2.5989417  | 2.26855604 | 25.0061393 | 1.74E-05 | 0.00154746 |
| ENSBTAG00000000459  | <i>POMGNT2</i>  | 497030    | protein-coding | -0.8206604 | 2.72282232 | 24.9264837 | 1.78E-05 | 0.00155861 |
| ENSBTAG00000039190  | <i>SLC9A5</i>   | 512686    | protein-coding | 1.11929109 | 5.27380074 | 24.9166898 | 1.78E-05 | 0.00155861 |
| ENSBTAG00000011666  | <i>THRSP</i>    | 515940    | protein-coding | 3.97143991 | 0.45878257 | 24.9138252 | 1.79E-05 | 0.00155861 |
| ENSBTAG00000016801  | <i>RXRG</i>     | 509500    | protein-coding | 0.85325906 | 3.78627101 | 24.8968125 | 1.79E-05 | 0.00155861 |
| ENSBTAG00000016775  | <i>SLC27A1</i>  | 513787    | protein-coding | -0.5219339 | 6.47760353 | 24.8774861 | 1.80E-05 | 0.00155861 |
| ENSBTAG00000013029  | <i>ARNTL</i>    | 530705    | protein-coding | -0.7553011 | 3.25967994 | 24.8376722 | 1.83E-05 | 0.00156557 |
| ENSBTAG00000004556  | <i>SLC2A3</i>   | 282358    | protein-coding | -0.8683995 | 3.60675024 | 24.8194862 | 1.84E-05 | 0.00156557 |
| ENSBTAG00000052788  |                 |           |                | 1.50083064 | 0.20854223 | 24.8014807 | 1.85E-05 | 0.00156557 |
| ENSBTAG00000038186  | <i>GLRX</i>     | 515416    | protein-coding | -0.6188612 | 4.58225966 | 24.7445445 | 1.88E-05 | 0.0015829  |
| ENSBTAG00000053346  | <i>SPSB2</i>    | 613651    | protein-coding | 0.71327101 | 3.5438641  | 24.6878782 | 1.91E-05 | 0.00160039 |
| ENSBTAG00000049882  |                 |           |                | 2.66322203 | -0.4536464 | 24.6393184 | 1.94E-05 | 0.00161423 |
| ENSBTAG00000003836  | <i>ADAM19</i>   | 510907    | protein-coding | -0.7948212 | 4.24696451 | 24.5162818 | 2.01E-05 | 0.00165544 |
| ENSBTAG00000050008  |                 |           |                | 0.60249415 | 4.7384194  | 24.5160726 | 2.01E-05 | 0.00165544 |
| ENSBTAG00000018024  | <i>NR1D2</i>    | 532076    | protein-coding | 0.5681516  | 5.84103026 | 24.2467957 | 2.18E-05 | 0.00178481 |
| ENSBTAG00000019091  | <i>RNPC3</i>    | 768060    | protein-coding | 0.54209645 | 4.43856048 | 24.1227833 | 2.26E-05 | 0.0018212  |
| ENSBTAG00000012844  | <i>LRSAM1</i>   | 507008    | protein-coding | 0.64608581 | 2.67085815 | 24.0471791 | 2.32E-05 | 0.00183484 |
| ENSBTAG00000024240  | <i>ACADM</i>    | 505968    | protein-coding | -0.6045961 | 5.99086422 | 24.0148031 | 2.34E-05 | 0.00183484 |
| ENSBTAG000000031295 | <i>HSDL2</i>    | 404131    | protein-coding | -0.5949123 | 5.39009294 | 24.0051158 | 2.35E-05 | 0.00183484 |
| ENSBTAG00000004367  | <i>COQ10A</i>   | 538821    | protein-coding | -0.5408475 | 7.45325023 | 23.9267931 | 2.40E-05 | 0.00186859 |
| ENSBTAG00000012896  | <i>METTL7B</i>  | 506952    | protein-coding | -1.3414956 | 1.17649973 | 23.8165548 | 2.48E-05 | 0.001912   |
| ENSBTAG00000012147  | <i>ARRDC1</i>   | 786098    | protein-coding | 0.804518   | 3.32233375 | 23.7323192 | 2.55E-05 | 0.00195015 |
| ENSBTAG00000037729  | <i>CERS1</i>    | 615296    | protein-coding | 0.53250312 | 3.00000023 | 23.6413215 | 2.62E-05 | 0.0019942  |
| ENSBTAG00000047930  | <i>UBE2E2</i>   | 784326    | protein-coding | 0.65559009 | 4.04758072 | 23.5091576 | 2.73E-05 | 0.00206524 |
| ENSBTAG00000002024  | <i>ASB18</i>    | 100141009 | protein-coding | 1.11002247 | 1.98804944 | 23.4272721 | 2.80E-05 | 0.00209516 |
| ENSBTAG00000046282  | <i>VGLL2</i>    | 541260    | protein-coding | 0.8698794  | 6.47862384 | 23.3614737 | 2.86E-05 | 0.00212656 |
| ENSBTAG00000012969  | <i>DKK2</i>     | 541161    | protein-coding | 1.14803999 | 1.69430926 | 23.2542076 | 2.95E-05 | 0.00217479 |
| ENSBTAG00000002883  | <i>RPTOR</i>    | 507056    | protein-coding | -0.5021311 | 4.45086576 | 23.2284199 | 2.97E-05 | 0.0021807  |
| ENSBTAG00000001133  | <i>VWA8</i>     | 524159    | protein-coding | -0.6637419 | 4.56655003 | 23.1687246 | 3.03E-05 | 0.00219824 |
| ENSBTAG00000000778  | <i>HSP90AB1</i> | 767874    | protein-coding | -0.5213675 | 8.56561306 | 23.0760965 | 3.12E-05 | 0.00225032 |
| ENSBTAG00000010502  | <i>SERTAD3</i>  | 767935    | protein-coding | -0.5337064 | 4.42123942 | 23.0422807 | 3.15E-05 | 0.00226233 |

|                     |                    |           |                |            |            |            |          |            |
|---------------------|--------------------|-----------|----------------|------------|------------|------------|----------|------------|
| ENSBTAG00000037456  | <i>AHDC1</i>       | 522105    | protein-coding | -0.6709208 | 5.27092127 | 22.9631691 | 3.23E-05 | 0.0022949  |
| ENSBTAG00000050785  |                    |           |                | 1.0686348  | 0.77431249 | 22.9328101 | 3.26E-05 | 0.00230491 |
| ENSBTAG00000021537  | <i>RWDD3</i>       | 614557    | protein-coding | 0.95764521 | 1.61409099 | 22.8359154 | 3.36E-05 | 0.00236325 |
| ENSBTAG00000012178  | <i>NR1D1</i>       | 768225    | protein-coding | 0.89674562 | 4.73723832 | 22.806942  | 3.39E-05 | 0.00237272 |
| ENSBTAG00000019792  | <i>SLC16A9</i>     | 539514    | protein-coding | -1.674479  | 0.3167394  | 22.7047976 | 3.50E-05 | 0.00241315 |
| ENSBTAG00000047339  | <i>BCOR</i>        | 784529    | protein-coding | -0.6902483 | 4.26889381 | 22.6140614 | 3.60E-05 | 0.00247012 |
| ENSBTAG00000014649  | <i>CPT2</i>        | 504502    | protein-coding | -0.6353239 | 4.06524667 | 22.5960603 | 3.62E-05 | 0.00247194 |
| ENSBTAG00000001609  | <i>MAP2K6</i>      | 286883    | protein-coding | -0.7389156 | 6.11989122 | 22.5420916 | 3.68E-05 | 0.00250172 |
| ENSBTAG00000025898  | <i>TBC1D8</i>      | 527162    | protein-coding | -0.6476234 | 3.82474485 | 22.5128898 | 3.71E-05 | 0.00251246 |
| ENSBTAG00000054572  | <i>PEG3</i>        | 444864    | protein-coding | -0.8398857 | 3.7269962  | 22.4799797 | 3.75E-05 | 0.00252625 |
| ENSBTAG00000047420  | <i>BTNL9</i>       | 100125313 | protein-coding | -0.9336577 | 5.22809644 | 22.3880096 | 3.86E-05 | 0.00257524 |
| ENSBTAG00000016109  | <i>DHRS12</i>      | 507276    | protein-coding | 0.72403034 | 3.53497834 | 22.304331  | 3.96E-05 | 0.00261875 |
| ENSBTAG00000018838  | <i>IQCA1L</i>      | 101903592 | protein-coding | 1.85682815 | 3.93250363 | 22.2720227 | 4.00E-05 | 0.00263303 |
| ENSBTAG00000046814  | <i>ACOT2</i>       | 511033    | protein-coding | -1.1972726 | 2.129367   | 22.1968176 | 4.10E-05 | 0.00268333 |
| ENSBTAG00000050737  |                    |           |                | -2.2774328 | 0.36199981 | 22.1735584 | 4.13E-05 | 0.00269047 |
| ENSBTAG00000044058  | <i>MFSD8</i>       | 515944    | protein-coding | 0.52196038 | 4.33987992 | 22.0426816 | 4.30E-05 | 0.00276508 |
| ENSBTAG00000025550  | <i>PRR2</i>        | 616551    | protein-coding | 1.05018051 | 1.16540463 | 22.0073427 | 4.35E-05 | 0.00278331 |
| ENSBTAG00000007245  | <i>IFT140</i>      | 100139697 | protein-coding | -1.0155087 | 0.87936705 | 21.9646278 | 4.41E-05 | 0.00280827 |
| ENSBTAG00000007988  | <i>STX2</i>        | 519148    | protein-coding | 0.51190397 | 3.0384753  | 21.9126726 | 4.48E-05 | 0.00282907 |
| ENSBTAG00000005565  | <i>CLN6</i>        | 617615    | protein-coding | 0.59206631 | 3.04015851 | 21.8663425 | 4.55E-05 | 0.00285794 |
| ENSBTAG00000013401  | <i>ARHGEF40</i>    | 527362    | protein-coding | -0.7041264 | 4.50836702 | 21.651736  | 4.87E-05 | 0.00303176 |
| ENSBTAG00000003822  | <i>CROCC</i>       | 530641    | protein-coding | 0.58104977 | 3.75775442 | 21.4443    | 5.20E-05 | 0.00319906 |
| ENSBTAG00000002012  | <i>CIAO2A</i>      | 512871    | protein-coding | 0.50994667 | 3.84774155 | 21.4412741 | 5.20E-05 | 0.00319906 |
| ENSBTAG00000021678  | <i>SLC31A1</i>     | 518976    | protein-coding | 0.73893337 | 4.63152827 | 21.4063304 | 5.26E-05 | 0.00322081 |
| ENSBTAG00000003808  | <i>HDAC9</i>       | 535415    | protein-coding | 1.26498068 | 3.02290874 | 21.3831143 | 5.30E-05 | 0.00323069 |
| ENSBTAG00000012070  | <i>INTS2</i>       | 534471    | protein-coding | 0.61501289 | 3.51666479 | 21.3598617 | 5.34E-05 | 0.00324072 |
| ENSBTAG00000044022  | <i>KIAA1671</i>    | 533883    | protein-coding | -1.0089477 | 3.98969782 | 21.2391306 | 5.55E-05 | 0.00333935 |
| ENSBTAG00000048643  |                    |           |                | 1.0234771  | 1.50977597 | 21.2033172 | 5.62E-05 | 0.00336346 |
| ENSBTAG00000037649  | <i>VIPR2</i>       | 790124    | protein-coding | 0.91591137 | 1.10523412 | 21.1256941 | 5.76E-05 | 0.00343352 |
| ENSBTAG00000020218  | <i>ANXA7</i>       | 533360    | protein-coding | 0.57150403 | 5.63626823 | 20.9336617 | 6.12E-05 | 0.00357389 |
| ENSBTAG000000051191 |                    |           |                | 0.98943355 | 8.05496575 | 20.7391655 | 6.52E-05 | 0.00373021 |
| ENSBTAG00000013162  | <i>HSPA8</i>       | 281831    | protein-coding | -0.5965628 | 10.0077127 | 20.7002209 | 6.60E-05 | 0.00374699 |
| ENSBTAG00000050076  | <i>MRLN</i>        | 101902281 | protein-coding | -0.9353925 | 4.52002419 | 20.6559313 | 6.70E-05 | 0.0037634  |
| ENSBTAG00000010351  | <i>SNX25</i>       | 533174    | protein-coding | -0.6255503 | 2.57563236 | 20.6211038 | 6.77E-05 | 0.00378312 |
| ENSBTAG00000050186  |                    |           |                | 1.14581598 | 2.31209194 | 20.5751092 | 6.87E-05 | 0.00382474 |
| ENSBTAG00000004432  | <i>CHRD1L</i>      | 100336905 | protein-coding | 0.95505843 | 3.55297895 | 20.3879159 | 7.31E-05 | 0.00403256 |
| ENSBTAG00000003100  | <i>SMTN</i>        | 528013    | protein-coding | 0.51257069 | 5.93969459 | 20.2855968 | 7.55E-05 | 0.00410481 |
| ENSBTAG00000003015  | <i>SESNI</i>       | 538226    | protein-coding | -0.8339011 | 5.9984065  | 20.2605483 | 7.61E-05 | 0.00412256 |
| ENSBTAG00000020984  | <i>RAPGEF4</i>     | 537312    | protein-coding | -0.8773369 | 1.7884974  | 20.1645895 | 7.86E-05 | 0.0042213  |
| ENSBTAG00000032617  | <i>FBXO44</i>      | 785057    | protein-coding | 0.89578048 | 2.64010839 | 20.095023  | 8.04E-05 | 0.0042788  |
| ENSBTAG00000053238  | <i>KALRN</i>       | 540675    | protein-coding | -0.7456958 | 3.41858537 | 20.0938276 | 8.04E-05 | 0.0042788  |
| ENSBTAG00000021021  | <i>C21H15orf39</i> | 784903    | protein-coding | -0.7772594 | 1.14393336 | 20.0857059 | 8.06E-05 | 0.0042788  |
| ENSBTAG00000020252  | <i>NLGN2</i>       | 787986    | protein-coding | 0.8144396  | 1.18792062 | 20.0769098 | 8.09E-05 | 0.0042788  |

|                    |                     |           |                |            |            |            |            |            |
|--------------------|---------------------|-----------|----------------|------------|------------|------------|------------|------------|
| ENSBTAG00000004908 | <i>CHRNE</i>        | 281688    | protein-coding | 0.8524249  | 5.15487875 | 20.0495521 | 8.16E-05   | 0.00430114 |
| ENSBTAG00000016401 | <i>OPTN</i>         | 534150    | protein-coding | 0.54573529 | 8.43556556 | 20.0247986 | 8.23E-05   | 0.00431792 |
| ENSBTAG00000043961 | <i>MPDZ</i>         | 536863    | protein-coding | 0.64192598 | 6.99785008 | 20.0149043 | 8.25E-05   | 0.00431792 |
| ENSBTAG00000013869 | <i>SH3BP4</i>       | 520462    | protein-coding | -0.6735441 | 4.11701964 | 19.839264  | 8.74E-05   | 0.00450729 |
| ENSBTAG00000017597 | <i>ESCO1</i>        | 535035    | protein-coding | -0.5187372 | 4.40303912 | 19.7024634 | 9.14E-05   | 0.00468081 |
| ENSBTAG00000001938 | <i>CKS2</i>         | 767985    | protein-coding | -1.0654242 | 1.80683198 | 19.6232967 | 9.39E-05   | 0.00477629 |
| ENSBTAG00000008376 | <i>SMRP1</i>        | 540767    | protein-coding | -0.5268596 | 4.65772917 | 19.6193743 | 9.40E-05   | 0.00477629 |
| ENSBTAG00000020584 | <i>IFT81</i>        | 519602    | protein-coding | 0.77871989 | 2.31630783 | 19.5235126 | 9.70E-05   | 0.00491246 |
| ENSBTAG00000010284 | <i>ETNPPL</i>       | 515186    | protein-coding | 0.50056602 | 5.90488622 | 19.4836855 | 9.83E-05   | 0.00495987 |
| ENSBTAG00000002764 | <i>IGFLR1</i>       | 617594    | protein-coding | 0.64370021 | 3.25199621 | 19.3699143 | 0.00010209 | 0.005071   |
| ENSBTAG00000010843 | <i>PGRMC2</i>       | 534021    | protein-coding | 0.52936621 | 6.16404876 | 19.324931  | 0.00010363 | 0.005071   |
| ENSBTAG00000009376 | <i>DPH1</i>         | 534099    | protein-coding | -0.5408845 | 3.05676175 | 19.3166751 | 0.00010391 | 0.005071   |
| ENSBTAG00000027425 | <i>CCDC190</i>      | 617478    | protein-coding | 1.40091395 | 2.14871309 | 19.3117226 | 0.00010409 | 0.005071   |
| ENSBTAG00000001450 | <i>APBB3</i>        | 525278    | protein-coding | 0.55897858 | 3.24614646 | 19.3102937 | 0.00010414 | 0.005071   |
| ENSBTAG00000019593 | <i>KNOP1</i>        | 511442    | protein-coding | -0.6025466 | 2.70135167 | 19.270131  | 0.00010554 | 0.00509373 |
| ENSBTAG00000018520 | <i>SCN1A</i>        | 529590    | protein-coding | 2.43798948 | 1.78598967 | 19.258254  | 0.00010596 | 0.00509373 |
| ENSBTAG00000016444 | <i>RETREG1</i>      | 540068    | protein-coding | 1.18109915 | 5.55079677 | 19.2514369 | 0.0001062  | 0.00509373 |
| ENSBTAG00000003719 | <i>TDRD7</i>        | 506702    | protein-coding | 0.55637463 | 4.01679011 | 19.2382354 | 0.00010666 | 0.00509373 |
| ENSBTAG00000004005 | <i>WDR7</i>         | 536469    | protein-coding | -0.5367852 | 4.15446097 | 19.2357437 | 0.00010675 | 0.00509373 |
| ENSBTAG00000022036 | <i>ZNRF3</i>        | 535441    | protein-coding | -0.9171652 | 0.97933264 | 19.1932663 | 0.00010827 | 0.00514132 |
| ENSBTAG00000004893 | <i>ACOX3</i>        | 510065    | protein-coding | -0.6098714 | 4.3671705  | 19.1339947 | 0.00011044 | 0.0052165  |
| ENSBTAG00000037449 | <i>ACSM5</i>        | 100298888 | protein-coding | 0.61054631 | 4.93712704 | 19.0490998 | 0.00011362 | 0.00534867 |
| ENSBTAG00000019315 | <i>PLA2G7</i>       | 282311    | protein-coding | -0.8422755 | 3.71616605 | 19.0101327 | 0.00011511 | 0.0054008  |
| ENSBTAG00000000671 | <i>PARP3</i>        | 507426    | protein-coding | 1.62728334 | 2.06730287 | 18.9895012 | 0.0001159  | 0.00542017 |
| ENSBTAG00000021026 | <i>PJA1</i>         | 786612    | protein-coding | 0.56468083 | 2.52864606 | 18.9067894 | 0.00011916 | 0.00555045 |
| ENSBTAG00000008101 | <i>PCSK5</i>        | 528098    | protein-coding | -0.7622141 | 2.5153843  | 18.8988913 | 0.00011948 | 0.00555045 |
| ENSBTAG00000016220 | <i>WIPF3</i>        | 786606    | protein-coding | -0.6079387 | 4.21942509 | 18.8748582 | 0.00012045 | 0.005577   |
| ENSBTAG00000001865 | <i>SGCG</i>         | 506155    | protein-coding | 0.7674015  | 6.34002917 | 18.8482309 | 0.00012153 | 0.00560864 |
| ENSBTAG00000020272 | <i>SIK2</i>         | 539570    | protein-coding | -0.6927205 | 4.36393658 | 18.691532  | 0.00012811 | 0.00587376 |
| ENSBTAG00000012106 | <i>ADCK1</i>        | 533372    | protein-coding | -0.7301133 | 1.53646317 | 18.6399717 | 0.00013035 | 0.00591894 |
| ENSBTAG00000043302 | <i>LOC112444957</i> | 112444957 | snoRNA         | 0.846688   | 0.86597993 | 18.5811238 | 0.00013297 | 0.00599545 |
| ENSBTAG00000010392 | <i>ESRRG</i>        | 536732    | protein-coding | -1.4742124 | 1.19031337 | 18.5734057 | 0.00013332 | 0.00599545 |
| ENSBTAG00000019402 | <i>CFAP100</i>      | 519687    | protein-coding | 2.56939575 | -0.5078763 | 18.5446926 | 0.00013462 | 0.0060267  |
| ENSBTAG00000013303 | <i>ACSS2</i>        | 506459    | protein-coding | 0.6110495  | 4.65844526 | 18.539178  | 0.00013487 | 0.0060267  |
| ENSBTAG00000014336 | <i>WBP1L</i>        | 782651    | protein-coding | -0.8153053 | 3.78474597 | 18.3526265 | 0.00014367 | 0.00635933 |
| ENSBTAG00000015310 | <i>SLC25A36</i>     | 510392    | protein-coding | 0.54403012 | 6.12507486 | 18.3184903 | 0.00014534 | 0.00638846 |
| ENSBTAG00000030208 | <i>ERFE</i>         | 101905782 | protein-coding | 1.76507283 | 0.56443188 | 18.1802492 | 0.00015234 | 0.00659806 |
| ENSBTAG00000019805 | <i>RHBDF1</i>       | 529167    | protein-coding | 0.60819078 | 4.49216785 | 18.0119664 | 0.00016135 | 0.00683718 |
| ENSBTAG00000013863 | <i>DUSP1</i>        | 539175    | protein-coding | -0.9304521 | 7.02159698 | 17.9263624 | 0.00016615 | 0.00698269 |
| ENSBTAG00000000087 | <i>HSD17B12</i>     | 789567    | protein-coding | 0.51245621 | 4.05966415 | 17.9257222 | 0.00016618 | 0.00698269 |
| ENSBTAG00000010637 | <i>ARSG</i>         | 513067    | protein-coding | -1.274859  | 2.75580936 | 17.8937299 | 0.00016802 | 0.00701777 |
| ENSBTAG00000005710 | <i>NCAM1</i>        | 281941    | protein-coding | 0.975457   | 3.60690849 | 17.8622153 | 0.00016984 | 0.00705218 |
| ENSBTAG00000036297 | <i>RBFA</i>         | 510927    | protein-coding | -0.5383366 | 3.07591559 | 17.8288444 | 0.0001718  | 0.00710828 |



|                     |                  |        |                |            |            |            |            |            |
|---------------------|------------------|--------|----------------|------------|------------|------------|------------|------------|
| ENSBTAG00000032281  | <i>LOC515547</i> | 515547 | pseudo         | -0.8137887 | 1.89698811 | 17.7727809 | 0.00017514 | 0.00720835 |
| ENSBTAG00000001511  | <i>BCL6</i>      | 539020 | protein-coding | -0.6930964 | 6.65085065 | 17.7595586 | 0.00017594 | 0.00722008 |
| ENSBTAG00000008394  | <i>MYL3</i>      | 618352 | protein-coding | -0.8029023 | 9.51870221 | 17.71811   | 0.00017846 | 0.00726194 |
| ENSBTAG00000030599  | <i>SMOC1</i>     | 508379 | protein-coding | 1.22885709 | 2.65901673 | 17.7174426 | 0.0001785  | 0.00726194 |
| ENSBTAG00000011150  | <i>PFN2</i>      | 539034 | protein-coding | 0.58673596 | 5.94133233 | 17.6825187 | 0.00018066 | 0.00728953 |
| ENSBTAG00000008370  |                  |        |                | 0.57969106 | 2.33478752 | 17.6813545 | 0.00018074 | 0.00728953 |
| ENSBTAG00000003051  | <i>FER</i>       | 536759 | protein-coding | 0.61960065 | 2.71098591 | 17.6520549 | 0.00018257 | 0.00731143 |
| ENSBTAG00000006035  | <i>PPP1R1B</i>   | 282459 | protein-coding | 1.06411792 | 1.5244466  | 17.647805  | 0.00018284 | 0.00731143 |
| ENSBTAG00000007434  | <i>CD300LG</i>   | 615388 | protein-coding | -0.5494638 | 5.79431266 | 17.5628074 | 0.00018828 | 0.00750769 |
| ENSBTAG000000040569 | <i>NLRX1</i>     | 539974 | protein-coding | 0.62275378 | 2.37986557 | 17.4815759 | 0.00019364 | 0.00763496 |
| ENSBTAG00000004599  | <i>TAGLN3</i>    | 515562 | protein-coding | 0.93559104 | 2.34319065 | 17.389004  | 0.00019995 | 0.00786167 |
| ENSBTAG00000038132  | <i>AIFM3</i>     | 526295 | protein-coding | 2.58596163 | -0.7677141 | 17.3736372 | 0.00020102 | 0.00788165 |
| ENSBTAG00000020000  | <i>RAP1GAP2</i>  | 786649 | protein-coding | -1.1212355 | 1.75337173 | 17.3531842 | 0.00020245 | 0.00788408 |
| ENSBTAG00000019733  | <i>ADGRL4</i>    | 535066 | protein-coding | -0.6124451 | 4.54302831 | 17.3472483 | 0.00020287 | 0.00788408 |
| ENSBTAG00000030593  | <i>RFTN1</i>     | 506782 | protein-coding | -0.587713  | 4.14117188 | 17.3408071 | 0.00020332 | 0.00788408 |
| ENSBTAG00000004256  | <i>ODC1</i>      | 281365 | protein-coding | -0.683307  | 6.86521458 | 17.3225105 | 0.00020461 | 0.00791251 |
| ENSBTAG00000016959  | <i>LAPTM4B</i>   | 404155 | protein-coding | -0.5205902 | 5.33512296 | 17.2813316 | 0.00020756 | 0.0080045  |
| ENSBTAG00000002402  | <i>IGF2R</i>     | 281849 | protein-coding | -0.5804229 | 7.03267572 | 17.2608664 | 0.00020904 | 0.00803962 |
| ENSBTAG00000015505  | <i>FADS2</i>     | 521822 | protein-coding | 0.74209264 | 4.2397256  | 17.2467189 | 0.00021007 | 0.00804634 |
| ENSBTAG00000017201  | <i>AP4S1</i>     | 618267 | protein-coding | 0.65675617 | 3.06648591 | 17.2349863 | 0.00021093 | 0.00804634 |
| ENSBTAG00000020417  | <i>DAPK3</i>     | 525506 | protein-coding | -0.5387016 | 5.34154406 | 17.0690614 | 0.00022349 | 0.0083666  |
| ENSBTAG00000002028  | <i>DIPK1A</i>    | 541171 | protein-coding | 0.56971399 | 3.71539476 | 17.0552317 | 0.00022457 | 0.0083848  |
| ENSBTAG00000013557  | <i>ERAP1</i>     | 514617 | protein-coding | -0.539222  | 4.43092609 | 17.0171459 | 0.00022758 | 0.00847464 |
| ENSBTAG00000020570  | <i>PRDM8</i>     | 507890 | protein-coding | 0.90345553 | 0.68416478 | 17.0086101 | 0.00022826 | 0.00847753 |
| ENSBTAG00000000387  | <i>NICN1</i>     | 614730 | protein-coding | 0.51488071 | 4.32998045 | 16.9469001 | 0.00023324 | 0.00861707 |
| ENSBTAG00000007012  | <i>ZNF3</i>      | 618141 | protein-coding | 0.58331337 | 3.2383988  | 16.8873712 | 0.00023816 | 0.00875462 |
| ENSBTAG00000020698  | <i>MTHFR</i>     | 497032 | protein-coding | 0.52010151 | 5.25338353 | 16.8855046 | 0.00023831 | 0.00875462 |
| ENSBTAG00000016520  | <i>LOC786948</i> | 786948 | protein-coding | 1.27816667 | 0.87389908 | 16.8718928 | 0.00023945 | 0.00875462 |
| ENSBTAG00000000160  | <i>CBS</i>       | 514525 | protein-coding | 0.92969206 | 1.95583763 | 16.8527215 | 0.00024107 | 0.00879085 |
| ENSBTAG000000047286 |                  |        |                | -0.577434  | 2.58249591 | 16.7581875 | 0.00024921 | 0.00904076 |
| ENSBTAG000000006432 | <i>KCNE4</i>     | 615761 | protein-coding | -1.0817176 | 0.32801146 | 16.7213365 | 0.00025246 | 0.00909176 |
| ENSBTAG000000006320 | <i>DBT</i>       | 280759 | protein-coding | 0.60071422 | 4.25959176 | 16.6808631 | 0.00025608 | 0.00919532 |
| ENSBTAG00000021527  | <i>IGF1R</i>     | 281848 | protein-coding | -0.7517978 | 3.90748974 | 16.5976028 | 0.00026371 | 0.00932744 |
| ENSBTAG000000007415 | <i>SLC7A8</i>    | 536818 | protein-coding | -1.2422296 | 6.46668273 | 16.5770689 | 0.00026562 | 0.00934731 |
| ENSBTAG00000017746  | <i>SLIT3</i>     | 615883 | protein-coding | -0.8993946 | 2.31142709 | 16.5540451 | 0.00026779 | 0.00937673 |
| ENSBTAG00000012885  | <i>ACAT1</i>     | 511082 | protein-coding | -0.5005675 | 6.81952426 | 16.536855  | 0.00026942 | 0.00939779 |
| ENSBTAG00000015361  | <i>CNTFR</i>     | 539548 | protein-coding | -1.0892623 | 3.62384674 | 16.5284701 | 0.00027022 | 0.00939779 |
| ENSBTAG00000011482  | <i>SLC43A2</i>   | 511955 | protein-coding | -1.6372112 | 6.1487181  | 16.5231789 | 0.00027073 | 0.00939779 |
| ENSBTAG00000021919  | <i>NAV1</i>      | 531974 | protein-coding | 0.56760207 | 3.83814362 | 16.519672  | 0.00027106 | 0.00939779 |
| ENSBTAG00000011847  | <i>ASPN</i>      | 507990 | protein-coding | -0.7274427 | 2.98185789 | 16.5024707 | 0.00027272 | 0.00943188 |
| ENSBTAG00000021999  | <i>CPT1A</i>     | 506812 | protein-coding | -0.9344202 | 5.09246463 | 16.478094  | 0.00027508 | 0.00949024 |
| ENSBTAG00000017832  | <i>PKD3</i>      | 510841 | protein-coding | -0.5365754 | 2.50662438 | 16.4547693 | 0.00027736 | 0.00953258 |
| ENSBTAG00000022520  | <i>BRCA1</i>     | 353120 | protein-coding | -0.5821835 | 2.14186316 | 16.3971913 | 0.00028307 | 0.00969477 |

|                    |                  |           |                |            |            |            |            |            |
|--------------------|------------------|-----------|----------------|------------|------------|------------|------------|------------|
| ENSBTAG00000015805 | <i>SIPA1L1</i>   | 787248    | protein-coding | -0.5251353 | 3.38450321 | 16.3861537 | 0.00028418 | 0.00970916 |
| ENSBTAG00000013910 | <i>POLR3GL</i>   | 505641    | protein-coding | 0.56282022 | 2.12265933 | 16.3539419 | 0.00028745 | 0.00979313 |
| ENSBTAG00000007785 | <i>PKD2L2</i>    | 521683    | protein-coding | 1.66653518 | -0.6806019 | 16.3465713 | 0.0002882  | 0.00979313 |
| ENSBTAG00000009655 | <i>TNS3</i>      | 516555    | protein-coding | -0.5707035 | 3.5730957  | 16.3346419 | 0.00028942 | 0.00979313 |
| ENSBTAG00000012139 | <i>SIX1</i>      | 511371    | protein-coding | -0.5032058 | 5.4528354  | 16.3021618 | 0.00029278 | 0.00988297 |
| ENSBTAG00000011734 | <i>ANKRD1</i>    | 510376    | protein-coding | 1.27023004 | 9.29023716 | 16.295297  | 0.0002935  | 0.0098834  |
| ENSBTAG00000020469 | <i>TMED8</i>     | 614106    | protein-coding | -1.5230286 | -0.1350338 | 16.2841388 | 0.00029466 | 0.00989898 |
| ENSBTAG00000019052 | <i>ANK3</i>      | 511203    | protein-coding | 0.61836754 | 7.03864575 | 16.2457883 | 0.00029871 | 0.00996353 |
| ENSBTAG00000007053 | <i>ZFHX2</i>     | 539758    | protein-coding | -0.6291358 | 2.47944382 | 16.2170313 | 0.00030178 | 0.01004219 |
| ENSBTAG00000039593 | <i>FAM98C</i>    | 508569    | protein-coding | 0.8463025  | 1.8848027  | 16.1814271 | 0.00030563 | 0.01011754 |
| ENSBTAG00000029926 | <i>MIR1-2</i>    | 100312988 | ncRNA          | 0.90814088 | 3.96583347 | 16.17619   | 0.0003062  | 0.01011754 |
| ENSBTAG00000010954 | <i>ART3</i>      | 407147    | protein-coding | -0.7051891 | 6.55115896 | 16.1527615 | 0.00030877 | 0.01016682 |
| ENSBTAG00000053952 |                  |           |                | -0.9781205 | 3.40408693 | 16.1494096 | 0.00030914 | 0.01016682 |
| ENSBTAG00000003510 | <i>MMRN2</i>     | 512308    | protein-coding | 0.5835573  | 4.47623494 | 16.1089734 | 0.00031363 | 0.01029045 |
| ENSBTAG00000039740 | <i>LY6G5B</i>    | 539236    | protein-coding | 0.6436634  | 2.38949006 | 16.0957924 | 0.0003151  | 0.01031387 |
| ENSBTAG00000015614 | <i>LNX2</i>      | 526424    | protein-coding | -0.5310346 | 4.29110534 | 16.0895709 | 0.00031581 | 0.01031387 |
| ENSBTAG00000011548 | <i>AMPD1</i>     | 512748    | protein-coding | 0.56917493 | 9.017041   | 16.0733341 | 0.00031764 | 0.01034981 |
| ENSBTAG00000044202 | <i>CNKSR2</i>    | 534112    | protein-coding | -0.615419  | 3.71216559 | 16.0062408 | 0.00032535 | 0.01052785 |
| ENSBTAG00000017567 | <i>ACACA</i>     | 281590    | protein-coding | 0.58427879 | 3.87684792 | 15.9407603 | 0.00033306 | 0.01074692 |
| ENSBTAG00000008363 | <i>EXD1</i>      | 617602    | protein-coding | 2.52172874 | -0.829105  | 15.9307364 | 0.00033426 | 0.01074692 |
| ENSBTAG00000020219 | <i>MSS51</i>     | 508577    | protein-coding | 0.95332295 | 7.80728409 | 15.9295008 | 0.00033441 | 0.01074692 |
| ENSBTAG00000049747 |                  |           |                | 1.16876144 | 2.32422844 | 15.9025832 | 0.00033765 | 0.01078165 |
| ENSBTAG00000017540 | <i>FAM13C</i>    | 540918    | protein-coding | -0.8745749 | 2.75913939 | 15.8707752 | 0.00034152 | 0.0108517  |
| ENSBTAG00000005259 | <i>UCP3</i>      | 281563    | protein-coding | -1.1338553 | 8.34374545 | 15.8621522 | 0.00034258 | 0.01085683 |
| ENSBTAG00000022920 | <i>RNF128</i>    | 535869    | protein-coding | 0.63784473 | 3.86572927 | 15.8569057 | 0.00034323 | 0.01085683 |
| ENSBTAG00000021294 | <i>VWA1</i>      | 505917    | protein-coding | 0.60229936 | 3.1358257  | 15.8302259 | 0.00034653 | 0.01093673 |
| ENSBTAG00000020073 | <i>NCEH1</i>     | 534212    | protein-coding | -0.6725861 | 3.06442967 | 15.806243  | 0.00034953 | 0.01100667 |
| ENSBTAG00000032450 |                  |           |                | 0.98452269 | 1.12569747 | 15.7983082 | 0.00035053 | 0.01100968 |
| ENSBTAG00000049410 | <i>PIERCE1</i>   | 618654    | protein-coding | -0.5776734 | 2.80552584 | 15.7930579 | 0.00035119 | 0.01100968 |
| ENSBTAG00000000125 | <i>SPATA5</i>    | 100297992 | protein-coding | -0.6568635 | 2.50259028 | 15.762943  | 0.00035501 | 0.01110479 |
| ENSBTAG00000054514 |                  |           |                | 0.97792506 | 3.48053497 | 15.742948  | 0.00035758 | 0.01116016 |
| ENSBTAG00000014143 | <i>ASB5</i>      | 516722    | protein-coding | 0.76335923 | 8.05611205 | 15.7075494 | 0.00036216 | 0.01123266 |
| ENSBTAG00000044106 | <i>SPIDR</i>     | 512910    | protein-coding | -0.8763887 | 2.23003416 | 15.7065407 | 0.00036229 | 0.01123266 |
| ENSBTAG00000002151 | <i>ASB15</i>     | 282591    | protein-coding | 0.79995357 | 5.6004104  | 15.6436287 | 0.0003706  | 0.01140167 |
| ENSBTAG00000003212 | <i>NNAT</i>      | 353114    | protein-coding | 0.92238902 | 2.79808946 | 15.6398554 | 0.0003711  | 0.01140167 |
| ENSBTAG00000031439 | <i>CDC14A</i>    | 614777    | protein-coding | -0.5770846 | 3.89863622 | 15.6390454 | 0.00037121 | 0.01140167 |
| ENSBTAG00000026394 | <i>UBALD1</i>    | 618672    | protein-coding | -0.5954113 | 5.69202964 | 15.6286798 | 0.0003726  | 0.01140167 |
| ENSBTAG00000013530 | <i>DDAH2</i>     | 540386    | protein-coding | 0.63316944 | 3.46924992 | 15.5077094 | 0.00038925 | 0.01180303 |
| ENSBTAG00000010939 | <i>CXHXorf58</i> | 515411    | protein-coding | 1.10670653 | 0.74383298 | 15.4540203 | 0.00039689 | 0.01193718 |
| ENSBTAG00000050010 |                  |           |                | -0.5720664 | 2.49980686 | 15.352722  | 0.00041174 | 0.01230501 |
| ENSBTAG00000002626 | <i>ARHGAP6</i>   | 100140016 | protein-coding | 0.54925803 | 2.47029394 | 15.3258749 | 0.00041578 | 0.01237811 |
| ENSBTAG00000001344 | <i>METTL21E</i>  | 513822    | protein-coding | -1.3759457 | 5.31052369 | 15.230454  | 0.00043046 | 0.01272931 |
| ENSBTAG00000007917 | <i>TSHZ2</i>     | 515677    | protein-coding | -0.5984158 | 3.26719905 | 15.2128506 | 0.00043323 | 0.01275758 |

|                    |                  |           |                |            |            |            |            |            |
|--------------------|------------------|-----------|----------------|------------|------------|------------|------------|------------|
| ENSBTAG00000019065 | <i>EEPD1</i>     | 511767    | protein-coding | 0.60790442 | 5.10692572 | 15.2027747 | 0.00043482 | 0.01277777 |
| ENSBTAG00000018453 | <i>ANKRD37</i>   | 509139    | protein-coding | 1.50295808 | 0.60362597 | 15.1247587 | 0.00044737 | 0.01302195 |
| ENSBTAG00000050809 | <i>GIPC3</i>     | 618265    | protein-coding | 1.18894932 | -0.0205345 | 15.1198407 | 0.00044818 | 0.01302195 |
| ENSBTAG00000010564 | <i>ELOVL6</i>    | 533333    | protein-coding | 1.51114087 | 1.28516024 | 15.1111107 | 0.00044961 | 0.01302195 |
| ENSBTAG00000000571 | <i>ARHGAP27</i>  | 789296    | protein-coding | -0.6278144 | 3.29154012 | 15.0923142 | 0.0004527  | 0.01308474 |
| ENSBTAG00000017218 | <i>ACER3</i>     | 615110    | protein-coding | 0.92948738 | 0.90439203 | 15.0636652 | 0.00045747 | 0.01316201 |
| ENSBTAG00000005002 | <i>GALE</i>      | 523154    | protein-coding | 0.80548755 | 0.95312793 | 15.0586757 | 0.0004583  | 0.01316201 |
| ENSBTAG00000008313 | <i>KLF15</i>     | 407241    | protein-coding | 0.87390021 | 3.58758725 | 15.049385  | 0.00045986 | 0.01316201 |
| ENSBTAG00000020900 | <i>RPUSD4</i>    | 516934    | protein-coding | -0.5305843 | 3.13461415 | 15.0292362 | 0.00046327 | 0.01316201 |
| ENSBTAG00000011461 | <i>ADORA1</i>    | 282133    | protein-coding | -1.6796608 | -0.4277579 | 15.0289057 | 0.00046332 | 0.01316201 |
| ENSBTAG00000018070 | <i>SCNM1</i>     | 505644    | protein-coding | 0.50592063 | 3.93241281 | 15.0222138 | 0.00046446 | 0.01316201 |
| ENSBTAG00000025329 | <i>IRF2BPL</i>   | 613845    | protein-coding | -0.5193616 | 4.70441572 | 15.020624  | 0.00046473 | 0.01316201 |
| ENSBTAG00000005716 | <i>CRABP2</i>    | 493998    | protein-coding | 1.56242407 | 0.00095383 | 14.9973462 | 0.00046871 | 0.01322413 |
| ENSBTAG00000020701 | <i>MEF2C</i>     | 512254    | protein-coding | 0.50475136 | 7.24861409 | 14.9967898 | 0.0004688  | 0.01322413 |
| ENSBTAG00000047801 | <i>CRELD2</i>    | 515222    | protein-coding | -0.7487925 | 1.77290842 | 14.9760104 | 0.00047238 | 0.01327197 |
| ENSBTAG00000013492 | <i>PRKAG3</i>    | 511961    | protein-coding | 0.96719497 | 5.86943544 | 14.9508398 | 0.00047676 | 0.01336827 |
| ENSBTAG00000005359 | <i>TGFB2</i>     | 534069    | protein-coding | 0.59645379 | 3.57844759 | 14.9146141 | 0.00048314 | 0.0134891  |
| ENSBTAG00000029906 | <i>MIR133A-2</i> | 100313253 | ncRNA          | 0.73039264 | 4.54766606 | 14.8232307 | 0.00049963 | 0.01375362 |
| ENSBTAG00000048486 | <i>IQANK1</i>    | 506831    | protein-coding | 0.70856837 | 2.86251512 | 14.8217948 | 0.00049989 | 0.01375362 |
| ENSBTAG00000017666 | <i>ABCC5</i>     | 511769    | protein-coding | 0.60110266 | 6.71263389 | 14.8192168 | 0.00050037 | 0.01375362 |
| ENSBTAG00000011680 | <i>PAPLN</i>     | 614084    | protein-coding | 1.15974795 | 0.52419699 | 14.8041673 | 0.00050314 | 0.01377867 |
| ENSBTAG00000009378 |                  |           |                | 0.86583407 | 0.92177626 | 14.7915897 | 0.00050548 | 0.0138157  |
| ENSBTAG00000004034 | <i>SESN3</i>     | 515914    | protein-coding | 0.70823981 | 3.01017209 | 14.7648013 | 0.00051049 | 0.01389863 |
| ENSBTAG00000033137 | <i>PSD3</i>      | 531459    | protein-coding | -0.7293191 | 3.02782466 | 14.7582442 | 0.00051172 | 0.01390533 |
| ENSBTAG00000007553 | <i>KCNA5</i>     | 508960    | protein-coding | -0.8496914 | 2.58344716 | 14.7376035 | 0.00051562 | 0.01397582 |
| ENSBTAG00000034113 | <i>GALNT10</i>   | 787200    | protein-coding | -0.6526922 | 3.08935294 | 14.7139338 | 0.00052014 | 0.01400784 |
| ENSBTAG00000012943 | <i>PPARGC1B</i>  | 514750    | protein-coding | -0.816504  | 3.80131788 | 14.7122404 | 0.00052047 | 0.01400784 |
| ENSBTAG00000020266 | <i>SLC19A2</i>   | 532860    | protein-coding | 1.03011254 | 2.38841177 | 14.6241772 | 0.00053766 | 0.01430646 |
| ENSBTAG00000013981 | <i>SPTSSA</i>    | 615641    | protein-coding | 0.75782774 | 5.6040813  | 14.5999763 | 0.00054249 | 0.01438062 |
| ENSBTAG00000004625 | <i>PYGB</i>      | 505560    | protein-coding | -0.5079384 | 2.37866001 | 14.5716777 | 0.0005482  | 0.01450458 |
| ENSBTAG00000046162 | <i>ZNF385C</i>   | 100298918 | protein-coding | -1.729483  | 0.49763085 | 14.5629595 | 0.00054997 | 0.01452414 |
| ENSBTAG00000016377 | <i>IPP</i>       | 785293    | protein-coding | 0.56026925 | 4.12038361 | 14.5238714 | 0.00055798 | 0.01468074 |
| ENSBTAG00000014642 | <i>NAPRT</i>     | 399559    | protein-coding | 0.60249182 | 3.1527675  | 14.5160767 | 0.0005596  | 0.01469571 |
| ENSBTAG00000009835 | <i>CACNA1G</i>   | 282411    | protein-coding | 1.7434124  | 0.54983531 | 14.4715123 | 0.00056892 | 0.01487492 |
| ENSBTAG00000016819 | <i>FABP3</i>     | 281758    | protein-coding | -0.6185128 | 6.80099552 | 14.4683448 | 0.00056959 | 0.01487492 |
| ENSBTAG00000014030 | <i>FGD6</i>      | 539481    | protein-coding | -0.6343589 | 3.45467517 | 14.4683144 | 0.00056959 | 0.01487492 |
| ENSBTAG00000020831 | <i>CHD1L</i>     | 524787    | protein-coding | 0.68812348 | 3.46533169 | 14.4490185 | 0.00057368 | 0.01495403 |
| ENSBTAG00000006039 | <i>ARHGDIB</i>   | 327676    | protein-coding | -0.5028834 | 5.03801484 | 14.4035997 | 0.00058344 | 0.01512428 |
| ENSBTAG00000013860 | <i>GADD45A</i>   | 505463    | protein-coding | -0.8282569 | 4.8485276  | 14.3652389 | 0.00059182 | 0.01528512 |
| ENSBTAG00000001745 | <i>LUM</i>       | 280847    | protein-coding | 0.83316386 | 4.97876499 | 14.3202377 | 0.00060181 | 0.01531539 |
| ENSBTAG00000049331 |                  |           |                | -1.372738  | 2.78942815 | 14.3165021 | 0.00060264 | 0.01531539 |
| ENSBTAG00000049058 | <i>INHBB</i>     | 530430    | protein-coding | 0.91743716 | 1.90727396 | 14.3158919 | 0.00060278 | 0.01531539 |
| ENSBTAG00000020074 | <i>NKPD1</i>     | 789234    | protein-coding | 1.31486957 | 0.05946712 | 14.2535611 | 0.00061694 | 0.01559073 |

|                    |                  |           |                |            |            |            |            |            |
|--------------------|------------------|-----------|----------------|------------|------------|------------|------------|------------|
| ENSBTAG00000012675 | <i>MYO19</i>     | 508229    | protein-coding | 0.65386129 | 3.28679816 | 14.2176724 | 0.00062525 | 0.01574762 |
| ENSBTAG00000011403 | <i>RUSC2</i>     | 507809    | protein-coding | 0.57047059 | 5.83345465 | 14.2091917 | 0.00062723 | 0.01576433 |
| ENSBTAG00000003084 | <i>GPATCH2L</i>  | 509393    | protein-coding | 0.50828579 | 5.24919139 | 14.2046923 | 0.00062829 | 0.01576433 |
| ENSBTAG00000001176 | <i>LRRN1</i>     | 539619    | protein-coding | 0.91610887 | 3.55349631 | 14.1938564 | 0.00063083 | 0.01580006 |
| ENSBTAG00000019675 | <i>ATXN1</i>     | 616399    | protein-coding | -0.5808947 | 4.42152109 | 14.1633868 | 0.00063805 | 0.0159525  |
| ENSBTAG00000012558 | <i>ADAMTS12</i>  | 525276    | protein-coding | -0.9241649 | 2.77290496 | 14.1521483 | 0.00064074 | 0.01597242 |
| ENSBTAG00000019672 | <i>LOC574091</i> | 574091    | protein-coding | -0.5094925 | 3.9682515  | 14.1505566 | 0.00064112 | 0.01597242 |
| ENSBTAG00000005244 | <i>RASL11A</i>   | 101903585 | protein-coding | -1.4091718 | 0.10640729 | 14.1402785 | 0.00064359 | 0.01600037 |
| ENSBTAG00000018807 | <i>MYBPHL</i>    | 538875    | protein-coding | 0.90751414 | 1.16666981 | 14.1364262 | 0.00064452 | 0.01600037 |
| ENSBTAG00000019409 | <i>GNPTAB</i>    | 509610    | protein-coding | -0.6656306 | 4.8256365  | 14.1151852 | 0.00064966 | 0.01608965 |
| ENSBTAG00000001455 | <i>HOXA7</i>     | 615851    | protein-coding | -0.6334077 | 1.93005311 | 14.0833307 | 0.00065745 | 0.01620704 |
| ENSBTAG00000000981 | <i>KLHDC8B</i>   | 527321    | protein-coding | 0.57722895 | 2.41840362 | 14.0280806 | 0.0006712  | 0.01645949 |
| ENSBTAG00000014602 | <i>CAMTA1</i>    | 504811    | protein-coding | 1.02940576 | 1.75906963 | 14.00743   | 0.00067641 | 0.01655858 |
| ENSBTAG00000031573 | <i>NMRK2</i>     | 780788    | protein-coding | -0.6899515 | 10.6292892 | 13.9800802 | 0.00068339 | 0.01670032 |
| ENSBTAG00000051412 | <i>HBA</i>       | 512439    | protein-coding | -3.037222  | -0.3871582 | 13.9635201 | 0.00068765 | 0.01676452 |
| ENSBTAG00000000442 | <i>RBP4</i>      | 281444    | protein-coding | 1.48351862 | 1.71506556 | 13.9606263 | 0.0006884  | 0.01676452 |
| ENSBTAG00000019194 | <i>SHLD2</i>     | 508335    | protein-coding | 0.61413597 | 2.40620371 | 13.944475  | 0.00069259 | 0.01683739 |
| ENSBTAG00000001244 | <i>PLAT</i>      | 281407    | protein-coding | 0.57374531 | 4.58343806 | 13.9327304 | 0.00069565 | 0.01688269 |
| ENSBTAG00000014915 | <i>ETV5</i>      | 541166    | protein-coding | 0.94468918 | 3.0435645  | 13.8529667 | 0.00071684 | 0.01717288 |
| ENSBTAG00000048906 | <i>AHNAK2</i>    | 527701    | protein-coding | 0.98118846 | 1.15698947 | 13.8445999 | 0.0007191  | 0.01717288 |
| ENSBTAG00000040128 | <i>FZD4</i>      | 445416    | protein-coding | -0.5538308 | 5.09176055 | 13.8200615 | 0.00072577 | 0.01725676 |
| ENSBTAG00000051586 | <i>ECE2</i>      | 281134    | protein-coding | -0.7959879 | 1.48493962 | 13.8083082 | 0.000729   | 0.01730413 |
| ENSBTAG00000002473 | <i>ANGPTL4</i>   | 509963    | protein-coding | -1.3815104 | 5.91865452 | 13.7904393 | 0.00073392 | 0.01736253 |
| ENSBTAG00000006200 | <i>SLC25A17</i>  | 506631    | protein-coding | 0.52758044 | 3.61520097 | 13.7647812 | 0.00074106 | 0.01745937 |
| ENSBTAG00000029954 |                  |           |                | 1.70364279 | -0.6832214 | 13.7623599 | 0.00074174 | 0.01745937 |
| ENSBTAG00000047997 | <i>PRPS2</i>     | 537688    | protein-coding | 0.85809444 | 0.98686106 | 13.7240588 | 0.00075254 | 0.01759596 |
| ENSBTAG00000012247 | <i>MXRA8</i>     | 522392    | protein-coding | 0.74855735 | 2.81045731 | 13.7019107 | 0.00075886 | 0.01767466 |
| ENSBTAG00000052085 |                  |           |                | -0.8661477 | 0.9451822  | 13.6697344 | 0.00076815 | 0.01784242 |
| ENSBTAG00000014614 | <i>ACTA2</i>     | 515610    | protein-coding | -0.7389112 | 6.28317246 | 13.663659  | 0.00076992 | 0.017854   |
| ENSBTAG00000017860 | <i>HIPK2</i>     | 510158    | protein-coding | -0.7394424 | 3.58659217 | 13.6324807 | 0.00077906 | 0.01803618 |
| ENSBTAG00000017677 | <i>SCG3</i>      | 525941    | protein-coding | -1.2549303 | 0.26887383 | 13.6180883 | 0.00078331 | 0.01808129 |
| ENSBTAG00000051359 |                  |           |                | 1.01643337 | 3.07581741 | 13.6081159 | 0.00078628 | 0.01808129 |
| ENSBTAG00000051307 |                  |           |                | 0.81964762 | 4.18718981 | 13.5757343 | 0.00079599 | 0.01824802 |
| ENSBTAG00000021447 | <i>SIM2</i>      | 100337422 | protein-coding | -1.4232072 | 1.05656055 | 13.5171501 | 0.00081387 | 0.01852589 |
| ENSBTAG00000012976 | <i>WLS</i>       | 528123    | protein-coding | -0.5469122 | 3.96541084 | 13.5145225 | 0.00081469 | 0.01852589 |
| ENSBTAG00000012079 | <i>MYLK4</i>     | 518025    | protein-coding | -0.906945  | 3.38755201 | 13.4819575 | 0.00082483 | 0.01863604 |
| ENSBTAG00000001920 | <i>POLQ</i>      | 535323    | protein-coding | -1.2501231 | 0.6987064  | 13.4199699 | 0.0008445  | 0.01892865 |
| ENSBTAG00000011059 | <i>CDKN2C</i>    | 505691    | protein-coding | 0.59428471 | 3.01341586 | 13.4138045 | 0.00084648 | 0.01894296 |
| ENSBTAG00000032517 | <i>BCL7A</i>     | 616240    | protein-coding | -0.7625262 | 1.22458451 | 13.3802196 | 0.00085738 | 0.0190957  |
| ENSBTAG00000000395 | <i>ADAMTS20</i>  | 536137    | protein-coding | 0.60521048 | 4.78258603 | 13.3486962 | 0.00086774 | 0.01929597 |
| ENSBTAG00000014972 | <i>PTGER4</i>    | 282331    | protein-coding | -0.532863  | 3.79451936 | 13.3421954 | 0.0008699  | 0.01931335 |
| ENSBTAG00000004641 | <i>PLEKHA6</i>   | 107133475 | protein-coding | 0.72511128 | 1.53331356 | 13.3326151 | 0.00087308 | 0.01935352 |
| ENSBTAG00000046153 |                  |           |                | -0.838     | 3.7611653  | 13.3217817 | 0.0008767  | 0.01936412 |

|                    |                     |           |                |            |            |            |            |            |
|--------------------|---------------------|-----------|----------------|------------|------------|------------|------------|------------|
| ENSBTAG00000013943 | <i>ZNF703</i>       | 782419    | protein-coding | -0.7041336 | 3.02461949 | 13.2834926 | 0.0008896  | 0.01947602 |
| ENSBTAG00000020958 | <i>LRR8D</i>        | 539204    | protein-coding | -0.7062318 | 1.98115162 | 13.2639019 | 0.00089629 | 0.01949942 |
| ENSBTAG00000007732 | <i>ARPP21</i>       | 618648    | protein-coding | -0.5229754 | 5.59048772 | 13.2594609 | 0.00089781 | 0.01950239 |
| ENSBTAG00000021316 | <i>COL4A3</i>       | 317711    | protein-coding | 1.25139588 | 1.37878317 | 13.2224852 | 0.00091059 | 0.01961436 |
| ENSBTAG00000054931 | <i>CACNG4</i>       | 519331    | protein-coding | 0.80455434 | 3.58805924 | 13.2223367 | 0.00091064 | 0.01961436 |
| ENSBTAG00000016496 | <i>ZNF641</i>       | 538714    | protein-coding | -0.7057077 | 2.11264936 | 13.2203805 | 0.00091132 | 0.01961436 |
| ENSBTAG00000007665 | <i>NPR3</i>         | 281358    | protein-coding | 1.81094455 | 3.4388718  | 13.1984475 | 0.000919   | 0.01971955 |
| ENSBTAG00000048460 |                     |           |                | -0.6674679 | 2.29705121 | 13.1946192 | 0.00092035 | 0.01971955 |
| ENSBTAG00000051102 | <i>KCNK3</i>        | 519188    | protein-coding | -2.1852701 | -0.0224362 | 13.1874492 | 0.00092288 | 0.01974235 |
| ENSBTAG00000006253 | <i>FLNC</i>         | 528415    | protein-coding | -0.8320193 | 11.8151321 | 13.1794644 | 0.00092571 | 0.01976185 |
| ENSBTAG00000012338 | <i>FAH</i>          | 508724    | protein-coding | 0.9021463  | 2.16376037 | 13.1769436 | 0.0009266  | 0.01976185 |
| ENSBTAG00000000448 | <i>BDH1</i>         | 534090    | protein-coding | 1.25118893 | 1.13645041 | 13.1711017 | 0.00092868 | 0.01977615 |
| ENSBTAG00000038978 |                     |           |                | -0.9137276 | 1.19629878 | 13.1651925 | 0.00093078 | 0.01979102 |
| ENSBTAG00000002081 | <i>BMPR1B</i>       | 407128    | protein-coding | 1.01459416 | 2.54150695 | 13.1523471 | 0.00093537 | 0.01985866 |
| ENSBTAG00000026502 | <i>CYP2D14</i>      | 282211    | protein-coding | 1.0128816  | 1.71095472 | 13.1187091 | 0.00094751 | 0.02005589 |
| ENSBTAG00000012738 | <i>ZNF827</i>       | 104974573 | protein-coding | -0.6961363 | 2.10814873 | 13.0565063 | 0.0009704  | 0.02043559 |
| ENSBTAG00000026972 | <i>MYF5</i>         | 281335    | protein-coding | 0.79548877 | 1.27195954 | 13.0425691 | 0.00097561 | 0.02046608 |
| ENSBTAG00000018165 | <i>RIPOR2</i>       | 539635    | protein-coding | -0.7586501 | 3.58515419 | 13.0323008 | 0.00097947 | 0.0204947  |
| ENSBTAG00000049287 | <i>TSPYL5</i>       | 615997    | protein-coding | -0.810532  | 1.30009911 | 13.0225613 | 0.00098314 | 0.0204947  |
| ENSBTAG00000045086 |                     |           |                | 0.68432865 | 1.99442037 | 13.0196175 | 0.00098426 | 0.0204947  |
| ENSBTAG00000019039 | <i>ZNF239</i>       | 100848535 | protein-coding | 0.63716061 | 2.51178892 | 12.9832289 | 0.00099813 | 0.02069782 |
| ENSBTAG00000003935 | <i>TMBIM1</i>       | 404134    | protein-coding | 0.51445313 | 5.95765241 | 12.9119445 | 0.00102592 | 0.02105076 |
| ENSBTAG00000012036 | <i>HR</i>           | 785815    | protein-coding | -0.6505358 | 3.32636105 | 12.8928354 | 0.00103351 | 0.02111412 |
| ENSBTAG00000011310 | <i>NALF2</i>        | 613918    | protein-coding | -0.92738   | 1.93709675 | 12.7974971 | 0.00107227 | 0.02168571 |
| ENSBTAG00000010196 | <i>NUP43</i>        | 520174    | protein-coding | 0.53394896 | 4.85081217 | 12.7361562 | 0.00109803 | 0.02197331 |
| ENSBTAG00000015780 | <i>RCN2</i>         | 512717    | protein-coding | 0.60731786 | 3.87814243 | 12.7326976 | 0.0010995  | 0.02197331 |
| ENSBTAG00000023947 | <i>AVP11</i>        | 614488    | protein-coding | -0.5486154 | 4.10496271 | 12.7309158 | 0.00110026 | 0.02197331 |
| ENSBTAG00000031583 | <i>NUPR2</i>        | 614047    | protein-coding | 0.79131875 | 0.62635    | 12.7266283 | 0.00110209 | 0.02197331 |
| ENSBTAG00000049066 | <i>LOC616957</i>    | 616957    | protein-coding | 2.47871744 | -0.8907132 | 12.7245408 | 0.00110298 | 0.02197331 |
| ENSBTAG00000015140 | <i>RUNDC1</i>       | 539525    | protein-coding | -0.5567273 | 2.83741841 | 12.7042143 | 0.00111117 | 0.02207093 |
| ENSBTAG00000048660 | <i>C19H17orf113</i> | 116601118 | protein-coding | -1.4612866 | -0.1607789 | 12.6950433 | 0.00111566 | 0.02210559 |
| ENSBTAG00000019807 | <i>COL27A1</i>      | 513668    | protein-coding | 0.6972931  | 2.30239179 | 12.6632266 | 0.00112951 | 0.02229877 |
| ENSBTAG00000007922 | <i>RNF24</i>        | 767991    | protein-coding | -1.1819249 | -0.1950703 | 12.6432154 | 0.00113832 | 0.02237847 |
| ENSBTAG00000046333 | <i>C6H4orf54</i>    | 101904203 | protein-coding | -0.6320811 | 7.09234027 | 12.6138559 | 0.00115137 | 0.02254066 |
| ENSBTAG00000008466 | <i>CCNB1IP1</i>     | 615932    | protein-coding | 0.7197951  | 1.9074892  | 12.6082875 | 0.00115387 | 0.02255749 |
| ENSBTAG00000030247 | <i>NSMF</i>         | 615854    | protein-coding | 0.53355871 | 3.7767503  | 12.6036791 | 0.00115594 | 0.02255749 |
| ENSBTAG00000045879 | <i>CALHM5</i>       | 101903708 | protein-coding | -0.6059509 | 2.1657913  | 12.6012196 | 0.00115704 | 0.02255749 |
| ENSBTAG00000016881 | <i>ANPEP</i>        | 404191    | protein-coding | 1.44042958 | 1.23743535 | 12.5339078 | 0.00118774 | 0.02312391 |
| ENSBTAG00000011908 | <i>CPQ</i>          | 540923    | protein-coding | 1.32442823 | -0.328091  | 12.5268222 | 0.00119102 | 0.02315576 |
| ENSBTAG00000051090 | <i>KLF13</i>        | 789710    | protein-coding | -0.7228879 | 2.01089512 | 12.5153676 | 0.00119634 | 0.02322721 |
| ENSBTAG00000031135 | <i>CTXN3</i>        | 100125915 | protein-coding | 1.13806132 | 3.61735092 | 12.5013464 | 0.0012029  | 0.02332227 |
| ENSBTAG00000003504 | <i>GSS</i>          | 525059    | protein-coding | 0.57934475 | 2.18021262 | 12.4951479 | 0.00120581 | 0.02334652 |
| ENSBTAG00000014069 | <i>PKD4</i>         | 507367    | protein-coding | -1.749787  | 10.9012435 | 12.4913876 | 0.00120757 | 0.02334865 |

|                     |                     |           |                |            |            |            |            |            |
|---------------------|---------------------|-----------|----------------|------------|------------|------------|------------|------------|
| ENSBTAG00000037072  | <i>LOC112441908</i> | 112441908 | snRNA          | 3.39882245 | -0.6322429 | 12.44678   | 0.00122877 | 0.02361245 |
| ENSBTAG00000046542  | <i>FAM174C</i>      | 616355    | protein-coding | -0.6662247 | 1.72451006 | 12.4450299 | 0.00122961 | 0.02361245 |
| ENSBTAG00000005240  |                     |           |                | 0.60521603 | 3.28345429 | 12.439191  | 0.00123241 | 0.02363407 |
| ENSBTAG00000017566  | <i>TUFT1</i>        | 282104    | protein-coding | 0.9443267  | 1.18295181 | 12.3792645 | 0.0012616  | 0.02396527 |
| ENSBTAG00000018214  | <i>SHISA2</i>       | 617336    | protein-coding | 0.9372947  | 5.82186987 | 12.3590509 | 0.00127161 | 0.02412289 |
| ENSBTAG00000021487  | <i>CIART</i>        | 104968463 | protein-coding | 1.02339622 | 2.63510368 | 12.3375196 | 0.00128237 | 0.02426156 |
| ENSBTAG00000011896  | <i>GRIP2</i>        | 509537    | protein-coding | 0.75783552 | 4.13042848 | 12.2892566 | 0.00130683 | 0.0245968  |
| ENSBTAG00000017103  | <i>MAP3K13</i>      | 505369    | protein-coding | -0.8343116 | 0.22843952 | 12.2887831 | 0.00130708 | 0.0245968  |
| ENSBTAG00000046724  | <i>CBX6</i>         | 513830    | protein-coding | -0.5328032 | 2.2403054  | 12.1976927 | 0.00135463 | 0.02532243 |
| ENSBTAG00000019900  | <i>LNPEP</i>        | 521633    | protein-coding | -0.6320284 | 5.23950175 | 12.1899059 | 0.00135878 | 0.02536633 |
| ENSBTAG00000008541  | <i>MGST1</i>        | 493719    | protein-coding | 0.85250778 | 2.14198421 | 12.0913394 | 0.0014125  | 0.02602408 |
| ENSBTAG00000037778  | <i>CXCL3</i>        | 613667    | protein-coding | -1.1610354 | 2.52684074 | 12.0795163 | 0.0014191  | 0.02611141 |
| ENSBTAG00000015343  | <i>DYNC2I2</i>      | 531489    | protein-coding | -0.5385146 | 2.23120486 | 12.0462679 | 0.00143782 | 0.0262841  |
| ENSBTAG00000025718  | <i>HMGCLL1</i>      | 535508    | protein-coding | 1.05758495 | 0.92488909 | 11.9973924 | 0.00146582 | 0.02658881 |
| ENSBTAG00000002361  | <i>TMCC2</i>        | 768080    | protein-coding | -0.8418045 | 0.47478958 | 11.9628843 | 0.00148594 | 0.0268845  |
| ENSBTAG00000011959  | <i>GPR19</i>        | 540647    | protein-coding | -1.2498739 | -0.2748239 | 11.9409641 | 0.00149888 | 0.02704418 |
| ENSBTAG00000019596  | <i>GPRC5B</i>       | 516334    | protein-coding | 0.56739273 | 3.36006856 | 11.9226857 | 0.00150976 | 0.02717559 |
| ENSBTAG00000038286  | <i>PPDPFL</i>       | 100126183 | protein-coding | -1.2255252 | 5.34822814 | 11.8961544 | 0.00152569 | 0.02732533 |
| ENSBTAG00000020853  | <i>SLC16A13</i>     | 538855    | protein-coding | 0.78466278 | 1.92831836 | 11.8830338 | 0.00153364 | 0.02739537 |
| ENSBTAG00000005102  | <i>PHTF2</i>        | 520774    | protein-coding | 0.51057421 | 5.74431166 | 11.8355706 | 0.00156277 | 0.02780801 |
| ENSBTAG00000013406  | <i>CSRP2</i>        | 539381    | protein-coding | -0.6431341 | 2.20165045 | 11.8302787 | 0.00156605 | 0.02780801 |
| ENSBTAG00000018737  | <i>GLMN</i>         | 504211    | protein-coding | 0.51458557 | 2.58435496 | 11.8261857 | 0.0015686  | 0.02780801 |
| ENSBTAG00000013341  | <i>GYG2</i>         | 505258    | protein-coding | 0.56060869 | 3.67676767 | 11.8074683 | 0.00158029 | 0.02789591 |
| ENSBTAG00000052977  | <i>LOC112445076</i> | 112445076 | pseudo         | -0.6370103 | 1.71805197 | 11.8024138 | 0.00158346 | 0.02789591 |
| ENSBTAG00000001390  | <i>B4GALT4</i>      | 511328    | protein-coding | 0.5391079  | 1.94026812 | 11.780095  | 0.00159756 | 0.02803897 |
| ENSBTAG00000010047  | <i>TIAM2</i>        | 100139161 | protein-coding | 0.7715401  | 2.26837298 | 11.7655053 | 0.00160685 | 0.02816682 |
| ENSBTAG000000051920 | <i>MIR29E</i>       | 100313099 | ncRNA          | 1.2752639  | 0.15571823 | 11.7623749 | 0.00160885 | 0.02816682 |
| ENSBTAG00000038733  | <i>EFS</i>          | 508559    | protein-coding | 0.81496438 | 1.03205561 | 11.7561892 | 0.00161281 | 0.02820108 |
| ENSBTAG00000005021  | <i>SEMA5A</i>       | 506636    | protein-coding | -0.508217  | 2.75037792 | 11.7327422 | 0.00162791 | 0.02832447 |
| ENSBTAG00000020679  | <i>CNTN1</i>        | 281705    | protein-coding | 1.05086702 | 0.096394   | 11.6667364 | 0.00167125 | 0.02876884 |
| ENSBTAG00000001773  |                     |           |                | -0.5193151 | 3.73216048 | 11.6606873 | 0.00167529 | 0.02876884 |
| ENSBTAG00000007629  | <i>THAP1</i>        | 538615    | protein-coding | -0.642914  | 1.78447528 | 11.6597166 | 0.00167593 | 0.02876884 |
| ENSBTAG00000030456  | <i>SPATA7</i>       | 510352    | protein-coding | 0.50857267 | 3.67281325 | 11.6453064 | 0.00168559 | 0.02886416 |
| ENSBTAG00000016716  | <i>RRS1</i>         | 510956    | protein-coding | -0.5687327 | 2.88541911 | 11.6315461 | 0.00169486 | 0.02890536 |
| ENSBTAG00000012992  | <i>CDH6</i>         | 537946    | protein-coding | -0.8954714 | 0.18039205 | 11.6261877 | 0.00169849 | 0.02890536 |
| ENSBTAG00000044071  | <i>HRH2</i>         | 521257    | protein-coding | 0.97645268 | 2.72014047 | 11.6196771 | 0.0017029  | 0.02890536 |
| ENSBTAG00000027064  | <i>BTBD11</i>       | 539986    | protein-coding | -1.2356406 | 1.96439829 | 11.6110021 | 0.00170881 | 0.02890536 |
| ENSBTAG00000014879  | <i>FAM185A</i>      | 531996    | protein-coding | -0.6726545 | 2.0535871  | 11.5899773 | 0.00172321 | 0.02904899 |
| ENSBTAG00000048059  | <i>TMEM86A</i>      | 532018    | protein-coding | -0.6997292 | 1.81052864 | 11.5682182 | 0.00173825 | 0.02925628 |
| ENSBTAG00000011934  | <i>PCK2</i>         | 282856    | protein-coding | 1.26682619 | 0.65082787 | 11.5639401 | 0.00174122 | 0.02925628 |
| ENSBTAG00000008739  | <i>SAMD11</i>       | 100140500 | protein-coding | 0.71290425 | 3.04453909 | 11.5631954 | 0.00174174 | 0.02925628 |
| ENSBTAG00000005678  | <i>AACS</i>         | 505842    | protein-coding | 0.52558074 | 2.35320392 | 11.5438214 | 0.00175528 | 0.02941879 |
| ENSBTAG00000005574  | <i>CLU</i>          | 280750    | protein-coding | 0.52167091 | 5.41613567 | 11.5433708 | 0.0017556  | 0.02941879 |

|                    |                     |           |                |            |            |            |            |            |
|--------------------|---------------------|-----------|----------------|------------|------------|------------|------------|------------|
| ENSBTAG00000009434 | <i>PAQR6</i>        | 516498    | protein-coding | 0.51679648 | 2.96503774 | 11.4370272 | 0.00183196 | 0.03058911 |
| ENSBTAG00000006548 | <i>MCCCI1</i>       | 513504    | protein-coding | 0.58696285 | 3.4560447  | 11.4101561 | 0.00185181 | 0.03075023 |
| ENSBTAG00000048699 |                     |           |                | 0.93685308 | 2.5492909  | 11.4091849 | 0.00185253 | 0.03075023 |
| ENSBTAG00000018431 | <i>NAV2</i>         | 100139508 | protein-coding | -0.7622789 | 3.7346623  | 11.4033998 | 0.00185683 | 0.03075095 |
| ENSBTAG00000014538 | <i>HPCAL4</i>       | 531339    | protein-coding | -0.8844611 | 3.00739696 | 11.3624735 | 0.0018876  | 0.03118529 |
| ENSBTAG00000004475 | <i>CDK5R1</i>       | 282173    | protein-coding | -0.7400381 | 0.59977375 | 11.3572823 | 0.00189154 | 0.03121377 |
| ENSBTAG00000046178 |                     |           |                | 0.52082664 | 2.20203815 | 11.3401119 | 0.00190464 | 0.0313564  |
| ENSBTAG00000025929 | <i>MTAP</i>         | 782907    | protein-coding | -0.596957  | 1.87394661 | 11.3371039 | 0.00190695 | 0.03135767 |
| ENSBTAG00000051406 |                     |           |                | 0.72344053 | 0.76471168 | 11.3293606 | 0.00191289 | 0.03141875 |
| ENSBTAG00000014885 | <i>MYOM3</i>        | 532872    | protein-coding | -0.7050698 | 7.59871706 | 11.3212028 | 0.00191918 | 0.03145057 |
| ENSBTAG00000009050 | <i>ADIPOR2</i>      | 407234    | protein-coding | -0.5203634 | 6.01592529 | 11.3210475 | 0.0019193  | 0.03145057 |
| ENSBTAG00000015942 | <i>DNAJA4</i>       | 528615    | protein-coding | -0.7034224 | 6.00964718 | 11.3127487 | 0.00192572 | 0.03146302 |
| ENSBTAG00000013048 | <i>NIPAL3</i>       | 616724    | protein-coding | -0.5647419 | 1.76440455 | 11.2982963 | 0.00193695 | 0.03155611 |
| ENSBTAG00000047605 | <i>LOC100337457</i> | 100337457 | protein-coding | -0.6295174 | 4.24304455 | 11.2493204 | 0.00197553 | 0.0319962  |
| ENSBTAG00000003721 | <i>CHST1</i>        | 506932    | protein-coding | 0.51294083 | 3.43501149 | 11.2412942 | 0.00198193 | 0.0319962  |
| ENSBTAG00000012849 | <i>COL4A1</i>       | 282191    | protein-coding | -0.5846816 | 9.10889617 | 11.2260012 | 0.00199419 | 0.03205849 |
| ENSBTAG00000019138 | <i>KIF3C</i>        | 777770    | protein-coding | 0.5305604  | 2.71523774 | 11.2256136 | 0.0019945  | 0.03205849 |
| ENSBTAG00000000588 | <i>CHODL</i>        | 613942    | protein-coding | 0.68954691 | 2.63761058 | 11.2248554 | 0.00199511 | 0.03205849 |
| ENSBTAG00000005525 | <i>LHX6</i>         | 541261    | protein-coding | -0.7779189 | 2.86775258 | 11.1729555 | 0.00203735 | 0.03250771 |
| ENSBTAG00000007142 | <i>CPPED1</i>       | 537938    | protein-coding | -0.629528  | 0.89196638 | 11.1718568 | 0.00203825 | 0.03250771 |
| ENSBTAG00000009620 |                     |           |                | 0.8306725  | 1.08889657 | 11.1535346 | 0.00205339 | 0.03265938 |
| ENSBTAG00000004249 | <i>TANC2</i>        | 529494    | protein-coding | 0.62037743 | 3.99008263 | 11.1495889 | 0.00205667 | 0.03267458 |
| ENSBTAG00000017660 | <i>LOC100297302</i> | 100297302 | pseudo         | 0.5203139  | 3.02911427 | 11.1418642 | 0.0020631  | 0.0326904  |
| ENSBTAG00000010877 | <i>ARMC12</i>       | 540812    | protein-coding | -1.6711347 | 2.65864154 | 11.1235531 | 0.00207843 | 0.03282932 |
| ENSBTAG00000001074 | <i>SAYSD1</i>       | 618888    | protein-coding | -0.7608401 | 0.86018103 | 11.121209  | 0.0020804  | 0.03282932 |
| ENSBTAG00000015274 | <i>PRL</i>          | 280901    | protein-coding | -1.8189585 | -0.6367476 | 11.1044366 | 0.00209457 | 0.03294336 |
| ENSBTAG00000048774 | <i>ALKAL2</i>       | 616690    | protein-coding | 1.10738398 | -0.7169816 | 11.0952438 | 0.00210237 | 0.03296765 |
| ENSBTAG00000045981 | <i>DIRAS1</i>       | 618387    | protein-coding | 1.18062863 | -0.4372124 | 11.085046  | 0.00211107 | 0.03302028 |
| ENSBTAG00000010809 | <i>HID1</i>         | 540436    | protein-coding | -0.5841042 | 3.69059026 | 11.0825656 | 0.00211319 | 0.03302028 |
| ENSBTAG00000048655 | <i>NT5E</i>         | 281363    | protein-coding | 0.79106896 | 0.97843135 | 11.0633159 | 0.00212973 | 0.03318253 |
| ENSBTAG00000009907 | <i>MAPK4</i>        | 529183    | protein-coding | 1.32406614 | 1.65155812 | 11.0539055 | 0.00213787 | 0.03321482 |
| ENSBTAG00000007702 | <i>RPP38</i>        | 511723    | protein-coding | -0.5488783 | 1.73321535 | 11.0318749 | 0.00215704 | 0.03340215 |
| ENSBTAG00000005857 | <i>SLC6A1</i>       | 407118    | protein-coding | 0.61844989 | 4.86457922 | 11.0221952 | 0.00216553 | 0.03349667 |
| ENSBTAG00000010164 | <i>ESPNL</i>        | 524380    | protein-coding | -0.6363105 | 1.63754721 | 10.9893854 | 0.00219455 | 0.03377483 |
| ENSBTAG00000012861 | <i>KIF4A</i>        | 537127    | protein-coding | 0.66014977 | 2.63058813 | 10.9877468 | 0.00219601 | 0.03377483 |
| ENSBTAG00000010123 | <i>APOE</i>         | 281004    | protein-coding | 0.72746319 | 3.06335681 | 10.978834  | 0.00220397 | 0.03379424 |
| ENSBTAG00000011682 | <i>GLI2</i>         | 510255    | protein-coding | 0.60812997 | 1.63899362 | 10.975012  | 0.0022074  | 0.0338099  |
| ENSBTAG00000017819 | <i>PMVK</i>         | 513533    | protein-coding | 0.58309501 | 1.70630084 | 10.9472986 | 0.00223239 | 0.03415556 |
| ENSBTAG00000016676 | <i>PTER</i>         | 782020    | protein-coding | 0.59743702 | 3.81295909 | 10.9344438 | 0.00224409 | 0.03426003 |
| ENSBTAG00000014252 | <i>SPTLC3</i>       | 100336940 | protein-coding | -0.6033229 | 3.05607668 | 10.9223751 | 0.00225513 | 0.03439128 |
| ENSBTAG00000007804 | <i>RILPL2</i>       | 533228    | protein-coding | -0.6848657 | 2.53913805 | 10.9083867 | 0.002268   | 0.03447549 |
| ENSBTAG00000001385 | <i>ZSCAN2</i>       | 539320    | protein-coding | -0.6780914 | 1.5662292  | 10.8938527 | 0.00228145 | 0.03456802 |
| ENSBTAG00000050978 |                     |           |                | 1.08046464 | 0.16418346 | 10.8707742 | 0.00230299 | 0.03470759 |

|                    |                     |           |                |            |            |            |            |            |
|--------------------|---------------------|-----------|----------------|------------|------------|------------|------------|------------|
| ENSBTAG00000012774 | <i>RAB7B</i>        | 538050    | protein-coding | -0.517385  | 3.11049423 | 10.8628932 | 0.0023104  | 0.03478195 |
| ENSBTAG00000006587 | <i>ZNF367</i>       | 540823    | protein-coding | 0.58563571 | 1.81322445 | 10.8419175 | 0.00233023 | 0.03500519 |
| ENSBTAG00000050814 | <i>CFAP70</i>       | 529891    | protein-coding | 0.62345779 | 1.92829515 | 10.7980548 | 0.0023723  | 0.03544844 |
| ENSBTAG00000048717 |                     |           |                | -0.5337216 | 2.78903402 | 10.7877419 | 0.0023823  | 0.03556024 |
| ENSBTAG00000036099 | <i>LOC104968656</i> | 104968656 | protein-coding | 0.55273976 | 2.32492234 | 10.7837785 | 0.00238616 | 0.0355801  |
| ENSBTAG00000010008 | <i>TTC12</i>        | 515758    | protein-coding | 1.24427011 | -0.4435512 | 10.7399116 | 0.00242931 | 0.03598448 |
| ENSBTAG00000003165 | <i>ADAMTS9</i>      | 537051    | protein-coding | 0.57193887 | 4.86348459 | 10.7344138 | 0.00243478 | 0.03599997 |
| ENSBTAG00000046307 | <i>CEBPD</i>        | 281678    | protein-coding | -1.2461796 | 5.19570904 | 10.7110714 | 0.00245814 | 0.03623115 |
| ENSBTAG00000019347 | <i>PLXDC1</i>       | 536989    | protein-coding | 0.76571035 | 3.1863339  | 10.7061508 | 0.00246309 | 0.0362662  |
| ENSBTAG00000003130 | <i>CHRNA3</i>       | 282702    | protein-coding | 0.90032353 | 1.52878788 | 10.6928741 | 0.00247651 | 0.03640408 |
| ENSBTAG00000020979 | <i>NGFR</i>         | 353110    | protein-coding | 1.15637533 | -0.0600276 | 10.6831482 | 0.00248639 | 0.03645676 |
| ENSBTAG00000017661 | <i>RFX2</i>         | 534475    | protein-coding | -1.0869111 | 2.70338079 | 10.6681203 | 0.00250175 | 0.03660558 |
| ENSBTAG00000048873 |                     |           |                | 0.63438446 | 3.22917443 | 10.6610743 | 0.00250898 | 0.03666113 |
| ENSBTAG00000051298 | <i>PVR</i>          | 526865    | protein-coding | 0.57132875 | 5.46565481 | 10.6587997 | 0.00251132 | 0.03666113 |
| ENSBTAG00000034147 | <i>OLFML2B</i>      | 513053    | protein-coding | 0.59471303 | 3.36032047 | 10.5828846 | 0.00259075 | 0.03759532 |
| ENSBTAG00000002092 | <i>PI16</i>         | 507058    | protein-coding | 0.73004129 | 3.83812259 | 10.5763912 | 0.00259767 | 0.03761815 |
| ENSBTAG00000003457 | <i>ATF5</i>         | 515654    | protein-coding | 0.89765906 | 2.45912669 | 10.5599508 | 0.00261528 | 0.0376978  |
| ENSBTAG00000036363 | <i>MIR133A-1</i>    | 100313361 | ncRNA          | 0.83988935 | 1.47350077 | 10.5588932 | 0.00261641 | 0.0376978  |
| ENSBTAG00000015535 | <i>NEK8</i>         | 532332    | protein-coding | 0.92101607 | 0.17346703 | 10.5569678 | 0.00261849 | 0.0376978  |
| ENSBTAG00000009080 | <i>ITGB6</i>        | 282644    | protein-coding | 0.62250479 | 5.03286262 | 10.556265  | 0.00261924 | 0.0376978  |
| ENSBTAG00000006507 | <i>ADAMTS3</i>      | 534082    | protein-coding | -1.4182339 | -0.2576698 | 10.5509159 | 0.00262501 | 0.03774218 |
| ENSBTAG00000003345 | <i>FAT4</i>         | 781683    | protein-coding | -0.5697304 | 4.4381335  | 10.5323939 | 0.00264507 | 0.03795316 |
| ENSBTAG00000019761 | <i>MANBA</i>        | 281909    | protein-coding | 0.81839347 | 2.13821889 | 10.5179249 | 0.00266086 | 0.03810203 |
| ENSBTAG00000001992 | <i>CYP51A1</i>      | 505060    | protein-coding | 0.66133855 | 2.53955486 | 10.5073844 | 0.00267243 | 0.03822876 |
| ENSBTAG00000001156 | <i>ST3GAL1</i>      | 282351    | protein-coding | -0.9474894 | 0.98141361 | 10.4980226 | 0.00268275 | 0.03829852 |
| ENSBTAG00000001462 | <i>FLT4</i>         | 338031    | protein-coding | 1.27917263 | 0.3836233  | 10.4753316 | 0.00270793 | 0.03853857 |
| ENSBTAG00000010682 | <i>DDR1</i>         | 534092    | protein-coding | 0.62380831 | 3.83069288 | 10.4716861 | 0.002712   | 0.03853857 |
| ENSBTAG00000018563 | <i>SFRP2</i>        | 510821    | protein-coding | -0.9911533 | 0.71274472 | 10.4684353 | 0.00271564 | 0.03853857 |
| ENSBTAG00000006067 | <i>VMAC</i>         | 515212    | protein-coding | 0.73408362 | 1.20228556 | 10.4658533 | 0.00271853 | 0.03853857 |
| ENSBTAG00000047088 |                     |           |                | -0.6172104 | 2.30738847 | 10.4632315 | 0.00272147 | 0.03853857 |
| ENSBTAG00000003815 | <i>EDEM2</i>        | 513253    | protein-coding | -0.5221897 | 2.62610235 | 10.4561235 | 0.00272945 | 0.03855464 |
| ENSBTAG00000005278 | <i>WEE1</i>         | 540322    | protein-coding | 0.51507294 | 3.11620928 | 10.4480595 | 0.00273854 | 0.03856359 |
| ENSBTAG00000014693 | <i>TMEM88</i>       | 507172    | protein-coding | -0.5231667 | 3.07941132 | 10.4432396 | 0.00274398 | 0.03856359 |
| ENSBTAG00000002817 | <i>SLC46A1</i>      | 511097    | protein-coding | 0.71633442 | 1.37462991 | 10.4408284 | 0.00274671 | 0.03856359 |
| ENSBTAG00000006703 | <i>PTGDR</i>        | 515331    | protein-coding | -0.5819958 | 4.48617569 | 10.410649  | 0.00278112 | 0.03887496 |
| ENSBTAG00000035174 | <i>THOC3</i>        | 529231    | protein-coding | -0.5209727 | 2.52598897 | 10.3907361 | 0.00280408 | 0.03904077 |
| ENSBTAG00000008836 |                     |           |                | -0.7563844 | 1.99481962 | 10.3650731 | 0.00283396 | 0.03937895 |
| ENSBTAG00000006187 | <i>MFAP4</i>        | 286766    | protein-coding | 0.71196314 | 1.72003074 | 10.3511592 | 0.00285031 | 0.03952804 |
| ENSBTAG00000003946 | <i>NECAB3</i>       | 514695    | protein-coding | 0.76782824 | 1.96430622 | 10.2952489 | 0.00291701 | 0.04004443 |
| ENSBTAG00000014390 | <i>MTMR9</i>        | 521746    | protein-coding | -0.5030502 | 2.88182564 | 10.2619032 | 0.00295759 | 0.04045778 |
| ENSBTAG00000010050 |                     |           |                | 0.65543079 | 2.05834288 | 10.2482531 | 0.00297438 | 0.04060845 |
| ENSBTAG00000001446 | <i>ABRACL</i>       | 505914    | protein-coding | -1.1077189 | 0.35404299 | 10.240037  | 0.00298453 | 0.04070757 |
| ENSBTAG00000019615 | <i>PHTF1</i>        | 536504    | protein-coding | -0.5199501 | 2.28825969 | 10.1895813 | 0.00304769 | 0.04122999 |



|                     |                  |           |                |            |            |            |            |            |
|---------------------|------------------|-----------|----------------|------------|------------|------------|------------|------------|
| ENSBTAG00000045633  | <i>AGTR1</i>     | 281607    | protein-coding | -0.5352201 | 3.10262403 | 10.1871977 | 0.00305071 | 0.04122999 |
| ENSBTAG00000031433  | <i>TEX9</i>      | 518432    | protein-coding | 0.90959895 | 1.10586888 | 10.1860833 | 0.00305212 | 0.04122999 |
| ENSBTAG00000018795  | <i>PMS1</i>      | 529491    | protein-coding | -0.5110289 | 3.66141999 | 10.1827661 | 0.00305633 | 0.04124726 |
| ENSBTAG00000051340  |                  |           |                | -1.4551872 | 1.24945426 | 10.1631556 | 0.00308134 | 0.04146551 |
| ENSBTAG00000025812  |                  |           |                | -1.2075067 | -0.163781  | 10.159877  | 0.00308554 | 0.04148241 |
| ENSBTAG00000024826  | <i>TECRL</i>     | 616643    | protein-coding | 0.5470014  | 3.2244313  | 10.1184623 | 0.00313916 | 0.04212278 |
| ENSBTAG00000010419  | <i>CYP2R1</i>    | 541302    | protein-coding | -0.7359976 | 2.33097806 | 10.089377  | 0.00317741 | 0.04235343 |
| ENSBTAG00000006563  | <i>KLHL40</i>    | 514526    | protein-coding | -0.8344872 | 7.52348913 | 10.0840655 | 0.00318445 | 0.04236199 |
| ENSBTAG00000009199  | <i>GLIS2</i>     | 527935    | protein-coding | 0.55204225 | 3.14673212 | 10.0701804 | 0.00320293 | 0.04241245 |
| ENSBTAG00000016206  | <i>MAOA</i>      | 281293    | protein-coding | -0.5428366 | 3.34844178 | 10.043109  | 0.00323929 | 0.04267893 |
| ENSBTAG00000015609  | <i>PREX1</i>     | 527410    | protein-coding | -0.6290102 | 3.10795063 | 10.0416623 | 0.00324125 | 0.04267893 |
| ENSBTAG00000006326  | <i>ALDH1L2</i>   | 516864    | protein-coding | 0.71784329 | 1.5910066  | 10.0371379 | 0.00324737 | 0.04271961 |
| ENSBTAG00000005431  | <i>LMCD1</i>     | 540474    | protein-coding | 0.54820474 | 6.87788339 | 10.0265967 | 0.00326169 | 0.04286788 |
| ENSBTAG00000018088  | <i>SETBP1</i>    | 617265    | protein-coding | 0.70182592 | 4.15076456 | 10.0129192 | 0.00328036 | 0.04303297 |
| ENSBTAG00000015980  | <i>FASN</i>      | 281152    | protein-coding | 0.81174616 | 5.18927207 | 9.99954576 | 0.00329873 | 0.04319486 |
| ENSBTAG00000044150  | <i>UCK2</i>      | 541028    | protein-coding | -0.6567515 | 1.34428754 | 9.97460997 | 0.00333329 | 0.04352442 |
| ENSBTAG00000048916  | <i>LIPG</i>      | 509808    | protein-coding | 1.14339868 | 1.71640806 | 9.94250984 | 0.00337833 | 0.04403096 |
| ENSBTAG00000005691  | <i>FGF2</i>      | 281161    | protein-coding | 0.53729945 | 2.13927607 | 9.92725186 | 0.00339998 | 0.04419026 |
| ENSBTAG00000012940  | <i>TMEM25</i>    | 504393    | protein-coding | 1.0962433  | 0.88975131 | 9.91693621 | 0.00341469 | 0.04434058 |
| ENSBTAG00000000679  | <i>PGM3</i>      | 505648    | protein-coding | 0.50149461 | 2.25690044 | 9.90193369 | 0.00343621 | 0.04450803 |
| ENSBTAG00000015104  | <i>CCDC28B</i>   | 507607    | protein-coding | 0.59254835 | 1.59858428 | 9.90115224 | 0.00343734 | 0.04450803 |
| ENSBTAG000000051880 |                  |           |                | -0.7893303 | 0.61813597 | 9.89914238 | 0.00344023 | 0.04450803 |
| ENSBTAG000000054037 |                  |           |                | 1.23888889 | -0.2143434 | 9.88846534 | 0.00345566 | 0.04458466 |
| ENSBTAG000000050436 | <i>SPAAR</i>     | 112441516 | protein-coding | -0.7322867 | 1.26533086 | 9.8705577  | 0.0034817  | 0.04476277 |
| ENSBTAG000000053608 |                  |           |                | 0.53972155 | 2.61102353 | 9.87022452 | 0.00348218 | 0.04476277 |
| ENSBTAG00000003958  | <i>TMEM220</i>   | 504970    | protein-coding | 0.59243921 | 1.07803636 | 9.8647041  | 0.00349025 | 0.04482557 |
| ENSBTAG00000011590  | <i>GLIPR1</i>    | 767905    | protein-coding | -1.5000614 | -0.6684518 | 9.85704725 | 0.00350148 | 0.04492877 |
| ENSBTAG00000000240  | <i>AKAP7</i>     | 613606    | protein-coding | 0.77229693 | 1.83829989 | 9.80752164 | 0.00357504 | 0.04568677 |
| ENSBTAG000000006937 |                  |           |                | 0.619534   | 1.23699335 | 9.80420085 | 0.00358003 | 0.04568677 |
| ENSBTAG000000050919 |                  |           |                | -1.441311  | -0.7342829 | 9.79832218 | 0.00358888 | 0.04575827 |
| ENSBTAG00000001864  | <i>NR4A3</i>     | 528877    | protein-coding | 2.60264441 | 5.28162809 | 9.76601942 | 0.00363796 | 0.04609168 |
| ENSBTAG00000005351  | <i>RFXAP</i>     | 540760    | protein-coding | -0.6247196 | 1.58589826 | 9.72791016 | 0.00369677 | 0.04651115 |
| ENSBTAG000000047426 | <i>LYPD6</i>     | 100337491 | protein-coding | 0.9419129  | 0.95966068 | 9.71914783 | 0.00371044 | 0.04651115 |
| ENSBTAG00000003304  | <i>HOXC4</i>     | 613740    | protein-coding | 0.9495482  | 0.31356831 | 9.71642395 | 0.0037147  | 0.04651115 |
| ENSBTAG00000008732  | <i>ZC3H12C</i>   | 512586    | protein-coding | 0.59673575 | 3.32073935 | 9.7122244  | 0.00372128 | 0.04651927 |
| ENSBTAG00000021364  | <i>TNK2</i>      | 280710    | protein-coding | -0.5222474 | 5.64282608 | 9.70911891 | 0.00372615 | 0.04653885 |
| ENSBTAG00000025903  | <i>GLDC</i>      | 507688    | protein-coding | 1.65897499 | -0.697718  | 9.69268162 | 0.00375205 | 0.04673794 |
| ENSBTAG00000009302  | <i>RCAN2</i>     | 525636    | protein-coding | -0.6538017 | 2.52094954 | 9.681881   | 0.00376918 | 0.0468465  |
| ENSBTAG000000053699 | <i>ZFP64</i>     | 539018    | protein-coding | -0.6698123 | 0.53515364 | 9.65769754 | 0.00380782 | 0.04719873 |
| ENSBTAG00000008763  | <i>PRR32</i>     | 783116    | protein-coding | 1.3107929  | 3.2923167  | 9.65501409 | 0.00381214 | 0.04719873 |
| ENSBTAG00000007196  | <i>TAGLN</i>     | 513463    | protein-coding | -0.6598435 | 5.49308854 | 9.65478036 | 0.00381251 | 0.04719873 |
| ENSBTAG00000014967  | <i>LOC536229</i> | 536229    | protein-coding | 0.75309408 | 1.1770692  | 9.63691188 | 0.00384138 | 0.04743095 |
| ENSBTAG00000013317  | <i>RNF168</i>    | 613812    | protein-coding | -0.5326289 | 4.07449386 | 9.63352185 | 0.00384688 | 0.04745726 |

|                     |                     |           |                |            |            |            |            |            |
|---------------------|---------------------|-----------|----------------|------------|------------|------------|------------|------------|
| ENSBTAG00000049610  |                     |           |                | 0.57536164 | 1.82849249 | 9.61762673 | 0.0038728  | 0.04773396 |
| ENSBTAG00000010647  | <i>NTRK2</i>        | 505824    | protein-coding | 0.92779235 | 0.86562738 | 9.61561347 | 0.00387609 | 0.04773396 |
| ENSBTAG00000015369  | <i>MLLT11</i>       | 539519    | protein-coding | 0.67334391 | 3.09885591 | 9.60310113 | 0.00389665 | 0.04790321 |
| ENSBTAG00000011659  | <i>PIGZ</i>         | 104968672 | protein-coding | 0.6467162  | 3.13506158 | 9.58967513 | 0.00391883 | 0.04813385 |
| ENSBTAG000000051975 |                     |           |                | 1.01469521 | -0.5446057 | 9.57880249 | 0.00393689 | 0.0481875  |
| ENSBTAG00000039340  | <i>SCN4B</i>        | 538100    | protein-coding | -0.6314247 | 7.11337639 | 9.55899404 | 0.00397002 | 0.04850872 |
| ENSBTAG000000053524 |                     |           |                | 1.09909601 | -0.4141162 | 9.55644378 | 0.00397431 | 0.04851899 |
| ENSBTAG000000053714 | <i>LOC100296900</i> | 100296900 | ncRNA          | 0.71638545 | 0.44224493 | 9.52633128 | 0.00402532 | 0.04897178 |
| ENSBTAG00000001153  | <i>TLE2</i>         | 533595    | protein-coding | 0.52647153 | 3.01829034 | 9.51225354 | 0.0040494  | 0.049126   |
| ENSBTAG000000000042 | <i>PYCR1</i>        | 539606    | protein-coding | 0.71418383 | 1.86516794 | 9.50291208 | 0.00406547 | 0.0491781  |
| ENSBTAG000000000853 |                     |           |                | -0.5157208 | 2.45463152 | 9.49157622 | 0.00408506 | 0.04927273 |
| ENSBTAG000000000271 | <i>MNS1</i>         | 532884    | protein-coding | 0.59951067 | 1.98911734 | 9.48756099 | 0.00409202 | 0.04931446 |
| ENSBTAG00000018399  | <i>MYH15</i>        | 526674    | protein-coding | 1.54428692 | -0.0417643 | 9.45525083 | 0.00414852 | 0.04978221 |
| ENSBTAG000000009614 | <i>NRROS</i>        | 510688    | protein-coding | -0.5780401 | 2.26168164 | 9.4424538  | 0.00417112 | 0.04999899 |
| ENSBTAG000000008175 | <i>ZNF713</i>       | 100126443 | protein-coding | 0.69250921 | 0.48966153 | 9.44100794 | 0.00417369 | 0.04999899 |
